# Supplementary material for: Asymmetric dearomatization of benzyl 1-naphthyl ethers via [1,3] O-to-C rearrangement
Source: Royal Society of Chemistry journal article supplement (doi:10.1039/d4cc02620a), 2024-01-01
Supplement: d4cc02620a1.pdf [file d4cc02620a1.pdf]

# Asymmetric dearomatization of benzyl 1-naphthyl ethers *via* [1,3] O-to-C rearrangement

Hongkun Zeng, Gang Wen, Lili Lin\* and Xiaoming Feng\*

Key Laboratory of Green Chemistry & Technology, Ministry of Education, College of Chemistry,  
Sichuan University, Chengdu 610064, P. R. China.

E-mail: lililin@scu.edu; xmfeng@scu.edu.cn

## Table of Contents

|                                                                                                                                                    |     |
|----------------------------------------------------------------------------------------------------------------------------------------------------|-----|
| 1. General Information .....                                                                                                                       | 2   |
| 2. Typical Procedure for the Synthesis of Substrates.....                                                                                          | 3   |
| 3. General Procedure for the Catalytic Asymmetric dearomatization.....                                                                             | 21  |
| 4. Optimization of Reaction Conditions .....                                                                                                       | 22  |
| 5. Gram-Scale Synthesis of the Product B1.....                                                                                                     | 25  |
| 6. Synthetic Transformation.....                                                                                                                   | 25  |
| 7. Kinetic Studies .....                                                                                                                           | 29  |
| 8. Unsuccessful Substrates .....                                                                                                                   | 31  |
| 9. X-ray Crystal Structures of Product B10 and Co(BF <sub>4</sub> ) <sub>2</sub> ·6H <sub>2</sub> O/L <sub>3</sub> -RaPr <sub>2</sub> Complex..... | 31  |
| 10. Spectral Characterization Data for the Products.....                                                                                           | 34  |
| 11. Copies of NMR Spectra for the Reaction Products.....                                                                                           | 79  |
| 12. Copies of NMR Spectra for the Reaction Substrates .....                                                                                        | 136 |
| 13. References .....                                                                                                                               | 192 |

## 1. General Information

Column chromatography was generally performed on silica gel (300–400 mesh) and reactions were monitored with thin-layer chromatography (TLC) using 254 nm UV light and basic  $\text{KMnO}_4$  aqueous. NMR characterization data were collected on Bruker ASCENDTM operating at 400 MHz and 600 MHz for  $^1\text{H}$  NMR, 101 MHz and 151 MHz for  $^{13}\text{C}\{^1\text{H}\}$  NMR (with complete proton decoupling), and 376 MHz and 565 MHz for  $^{19}\text{F}\{^1\text{H}\}$  NMR with complete proton decoupling, and 162 MHz or 243 MHz for  $^{31}\text{P}\{^1\text{H}\}$  NMR with complete proton decoupling.  $^1\text{H}$  NMR chemical shifts  $\delta$  were recorded in ppm relative to tetramethylsilane ( $\delta = 0.00$ ) and internally referenced to the residual solvent signal ( $\text{CDCl}_3 = 7.26$  ppm).  $^{13}\text{C}$  NMR spectra chemical shifts are reported in ppm from the tetramethylsilane with the solvent resonance as internal standard ( $\text{CDCl}_3$ ,  $\delta = 77.0$ ). Spectra were reported as follows: chemical shift ( $\delta$  ppm), multiplicity (s = singlet, d = doublet, t = triplet, q = quartet, m = multiplet), coupling constants (Hz), integration and assignment. Enantiomeric excesses (ee) were determined by supercritical fluid chromatography (SFC) analysis using the corresponding commercial chiral column as stated in the experimental procedures at 35 °C. Optical rotations were measured on Rudolph Research Analytic Automatic Polarimeter, and reported as follows:  $[\alpha]_D^{25}$  (c g/100 mL, in solvent). High-resolution mass spectra (HRMS) were performed on Thermo Q-Exactive Focus (FTMS+c ESI) and data were reported as (m/z). Infrared spectra (IR) were recorded on Bruker Tensor II spectrometer with Plantium ATR accessory and the peaks are reported as absorption maxima ( $\nu$ ,  $\text{cm}^{-1}$ ). Tetrahydrofuran (THF) and toluene were distilled from sodium benzophenone ketyl. 1,1,2,2-TCE, dichloromethane (DCM), and chloroform ( $\text{CHCl}_3$ ) were distilled over  $\text{CaH}_2$ .  $\text{Co}(\text{BF}_4)_2 \cdot 6\text{H}_2\text{O}$  was purchased from Sigma-Aldrich. The experiments requiring 1-naphthols<sup>1</sup> and chiral  $N,N'$ -dioxide ligands<sup>2</sup> were synthesized according to known procedures.

## 2. Typical Procedure for the Synthesis of Substrates

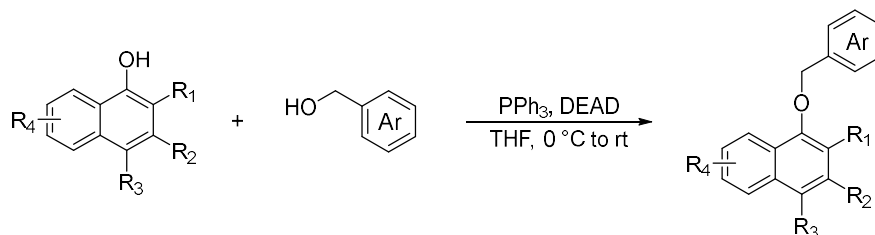

A solution of 1-naphthol (1.0 equiv), benzyl alcohol (1.2 equiv) and PPh<sub>3</sub> (1.5 equiv) in dry THF (4.0 mL/mmol of naphthol) at 0 °C, diethyl azodicarboxylate (DEAD, 1.5 equiv) was added dropwise. The reaction mixture was stirred at room temperature and detected by TLC. After removing the solvent under vacuo, the residue was subjected to flash column chromatography on silica gel and eluted with Pet/EtOAc (40:1 - 20:1, v/v) to afford the product.

### Ethyl 1-((4-methoxybenzyl)oxy)-4-phenyl-2-naphthoate (A1)

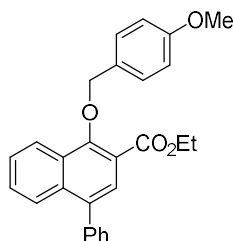

**Result:** 89% yield, white solid, Mp: 68–70 °C.

<sup>1</sup>H NMR (400 MHz, Chloroform-*d*) δ 8.45 – 8.25 (m, 1H), 8.11 – 7.76 (m, 2H), 7.62 – 7.38 (m, 9H), 6.99 (d, *J* = 8.3 Hz, 2H), 5.19 (s, 2H), 4.45 (q, *J* = 7.1 Hz, 2H), 3.86 (s, 3H), 1.41 (t, *J* = 7.1 Hz, 3H).

<sup>13</sup>C NMR (101 MHz, Chloroform-*d*) δ 166.2 , 159.6 , 156.1 , 139.8 , 136.1 , 134.8 , 130.1 , 129.9 , 129.4 , 129.0 , 128.3 , 128.2 , 127.4 , 127.4 , 126.3 , 126.2 , 124.1 , 119.5 , 113.9 , 77.5 , 61.2 , 55.3 , 14.3 .

**HRMS** (ESI) Calculated for C<sub>27</sub>H<sub>24</sub>O<sub>4</sub> ([M]<sup>+</sup>+Na<sup>+</sup>) = 435.12567, Found 435.1570.

**IR** (neat) 2979, 2317, 1720, 1613, 1513, 1412, 1392, 1225, 1151, 1033, 970, 857, 764, 634, 595 cm<sup>-1</sup>.

### Methyl 1-((4-methoxybenzyl)oxy)-4-phenyl-2-naphthoate (A2)

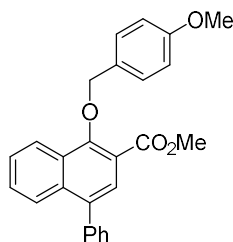

**Result:** 87% yield, white solid, Mp: 149–151 °C.

<sup>1</sup>H NMR (400 MHz, Chloroform-*d*) δ 8.41 – 8.35 (m, 1H), 7.91 (m, 1H), 7.86 (m, 1H), 7.59 – 7.45 (m, 9H), 6.99 (dd, *J* = 8.6, 2.1 Hz, 2H), 5.16 (s, 2H), 3.96 (s, 3H), 3.86 (s, 3H).

<sup>13</sup>C NMR (101 MHz, Chloroform-*d*) δ 166.6 , 159.7 , 156.2 , 139.8 , 136.2 , 134.9 , 130.1 , 130.1 , 129.3 , 129.1 , 128.3 , 127.5 , 127.4 , 126.4 , 126.3 , 124.1 , 119.1 , 114.0 , 77.7 , 55.3 , 52.3 .

**HRMS** (ESI) Calculated for C<sub>26</sub>H<sub>22</sub>O<sub>4</sub> ([M]<sup>+</sup>+Na<sup>+</sup>) = 421.1410, Found 421.1411.

**IR** (neat) 2999, 2836, 1723, 1612, 1512, 1411, 1389, 1227, 1126, 1033, 998, 824, 764, 634, 595 cm<sup>-1</sup>.

### Isopropyl 1-((4-methoxybenzyl)oxy)-4-phenyl-2-naphthoate (A3)

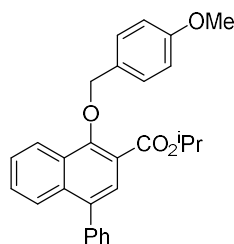

**Result:** 91% yield, white solid, Mp: 88–90 °C.

**<sup>1</sup>H NMR** (400 MHz, Chloroform-*d*) δ 8.33 (dd, *J* = 7.2, 2.4 Hz, 1H), 7.88 (m, 1H), 7.82 (d, *J* = 2.4 Hz, 1H), 7.59 – 7.45 (m, 9H), 6.98 (dd, *J* = 8.4, 1.4 Hz, 2H), 5.35 (dt, *J* = 12.7, 6.4 Hz, 1H), 5.18 (s, 2H), 3.86 (s, 3H), 1.39 (d, *J* = 6.3 Hz, 6H).

**<sup>13</sup>C NMR** (101 MHz, Chloroform-*d*) δ 165.8 , 159.6 , 155.9 , 139.9 , 136.0 , 134.7 , 130.1 , 129.8 , 129.5 , 129.0 , 128.3 , 128.1 , 127.4 , 127.4 , 126.3 , 126.2 , 124.1 , 119.9 , 113.9 , 77.4 , 68.6 , 55.3 , 22.0 .

**HRMS** (ESI) Calculated for C<sub>28</sub>H<sub>26</sub>O<sub>4</sub> ([M]+Na<sup>+</sup>) = 449.1723, Found 449.1725.

**IR** (neat) 2979, 2278, 1717, 1613, 1513, 1411, 1390, 1227, 1175, 1034, 973, 857, 764, 669, 594 cm<sup>-1</sup>.

### Benzyl 1-((4-methoxybenzyl)oxy)-4-phenyl-2-naphthoate (A4)

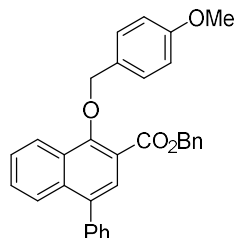

**Result:** 84% yield, white solid, Mp: 96–98 °C.

**<sup>1</sup>H NMR** (400 MHz, Chloroform-*d*) δ 8.36 (m, 1H), 7.99 – 7.79 (m, 2H), 7.59 – 7.31 (m, 14H), 6.95 (dt, *J* = 8.2, 3.9 Hz, 2H), 5.44 (s, 2H), 5.13 (s, 2H), 3.86 (s, 3H).

**<sup>13</sup>C NMR** (101 MHz, Chloroform-*d*) δ 166.1 , 159.6 , 156.3 , 139.8 , 136.2 , 135.9 , 135.0 , 130.1 , 130.0 , 129.3 , 129.1 , 128.6 , 128.5 , 128.4 , 128.3 , 127.5 , 127.4 , 126.4 , 126.3 , 124.1 , 119.2 , 113.9 , 77.6 , 67.0 , 55.3 .

**HRMS** (ESI) Calculated for C<sub>32</sub>H<sub>26</sub>O<sub>4</sub> ([M]+Na<sup>+</sup>) = 497.1723, Found 497.1731 .

**IR** (neat) 2953, 2835, 2278, 1721, 1613, 1513, 1412, 1222, 1174, 1033, 970, 857, 764, 636, 593 cm<sup>-1</sup>.

### Adamantan-1-yl 1-((4-methoxybenzyl)oxy)-4-phenyl-2-naphthoate (A5)

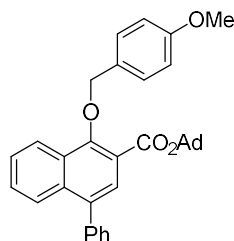

**Result:** 72% yield, white solid, Mp: 66–68 °C.

**<sup>1</sup>H NMR** (400 MHz, Chloroform-*d*) δ 8.38 – 8.18 (m, 1H), 7.86 (m, 1H), 7.73 (s, 1H), 7.56 – 7.43 (m, 9H), 6.98 (d, *J* = 8.6 Hz, 2H), 5.18 (s, 2H), 3.86 (s, 3H), 2.31 (d, *J* = 2.9 Hz, 6H), 2.23 (s, 3H), 1.80 – 1.62 (m, 6H).

**<sup>13</sup>C NMR** (101 MHz, Chloroform-*d*) δ 165.5 , 159.5 , 155.3 , 140.0 , 135.8 , 134.4 , 130.1 , 129.8 , 129.7 , 129.0 , 128.3 , 127.9 , 127.5 , 127.3 , 126.1 , 124.0 , 121.2 , 113.9 , 81.8 , 77.2 , 55.3 , 41.4 , 36.2 , 30.9 .

**HRMS** (ESI) Calculated for C<sub>35</sub>H<sub>34</sub>O<sub>4</sub> ([M]+Na<sup>+</sup>) = 541.2349, Found 541.2322.

**IR** (neat) 2999, 2283, 1713, 1612, 1512, 1410, 1317, 1227, 1173, 1034, 967, 874, 763, 639, 599 cm<sup>-1</sup>.

### Diethyl (1-((4-methoxybenzyl)oxy)-4-phenylnaphthalen-2-yl)phosphonate (A6)

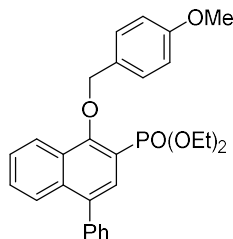

**Result:** 99% yield, colorless oil.

**<sup>1</sup>H NMR** (400 MHz, Chloroform-*d*)  $\delta$  8.35 – 8.26 (m, 1H), 7.93 (dd,  $J$  = 7.9, 1.6 Hz, 1H), 7.80 (d,  $J$  = 12.7 Hz, 1H), 7.69 (d,  $J$  = 8.6 Hz, 2H), 7.57 (m, 2H), 7.50 (m, 4H), 7.47 – 7.41 (m, 1H), 7.01 (d,  $J$  = 8.6 Hz, 2H), 5.27 (s, 2H), 4.31 – 4.20 (m, 4H), 3.86 (s, 3H), 1.36 (t,  $J$  = 7.1 Hz, 6H).

**<sup>13</sup>C NMR** (101 MHz, Chloroform-*d*)  $\delta$  159.5 , 158.5 , 158.5 , 139.7 , 136.6 , 136.5 , 135.3 , 135.3 , 130.0 , 130.0 , 129.4 , 129.2 , 129.1 , 128.3 , 128.2 , 127.4 , 126.6 , 126.3 , 123.4 , 118.5 , 116.6 , 113.8 , 77.6 , 62.3 , 62.2 , 55.2 , 16.4 , 16.3 .

**<sup>31</sup>P NMR** (162 MHz, Chloroform-*d*)  $\delta$  16.75 .

**HRMS** (ESI) Calculated for C<sub>28</sub>H<sub>29</sub>O<sub>5</sub>P ([M]<sup>+</sup>+Na<sup>+</sup>) = 499.1645, Found 469.1648.

**IR** (neat) 2981, 2281, 1739, 1613, 1514, 1444, 1355, 1248, 1173, 1050, 962, 873, 765, 682, 542 cm<sup>-1</sup>.

### 1-(1-((4-methoxybenzyl)oxy)-4-phenylnaphthalen-2-yl)ethan-1-one (A7)

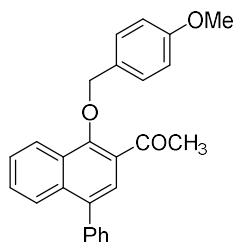

**Result:** 60% yield, white solid, Mp: 97–99 °C.

**<sup>1</sup>H NMR** (400 MHz, Chloroform-*d*)  $\delta$  8.35 (d,  $J$  = 7.5 Hz, 1H), 7.93 (d,  $J$  = 8.3 Hz, 1H), 7.68 (d,  $J$  = 3.2 Hz, 1H), 7.61 – 7.42 (m, 9H), 6.98 (d,  $J$  = 8.2 Hz, 2H), 5.07 (s, 2H), 3.86 (s, 3H), 2.75 (d,  $J$  = 1.6 Hz, 3H).

**<sup>13</sup>C NMR** (101 MHz, Chloroform-*d*)  $\delta$  200.6 , 159.8 , 155.0 , 139.7 , 136.6 , 134.9 , 130.0 , 129.9 , 128.6 , 128.3 , 128.3 , 128.2 , 127.5 , 126.5 , 126.5 , 126.1 , 123.7 , 114.1 , 78.5 , 55.3 , 31.0 .

**HRMS** (ESI) Calculated for C<sub>26</sub>H<sub>22</sub>O<sub>3</sub> ([M]<sup>+</sup>+Na<sup>+</sup>) = 405.1461, Found 405.1465

**IR** (neat) 2933, 2835, 1612, 1513, 1452, 1387, 1248, 1174, 1070, 1032, 960, 856, 765, 641, 567, cm<sup>-1</sup>.

### Ethyl 1-((4-methoxybenzyl)oxy)-3,4-diphenyl-2-naphthoate (A8)

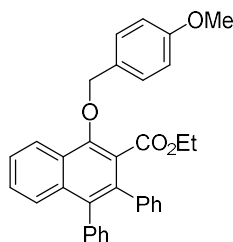

**Result:** 90% yield, white solid, Mp: 103–105 °C.

**<sup>1</sup>H NMR** (400 MHz, Chloroform-*d*)  $\delta$  8.27 (d,  $J$  = 7.2 Hz, 1H), 7.59 (d,  $J$  = 8.3 Hz, 1H), 7.51 (d,  $J$  = 7.3 Hz, 3H), 7.42 (t,  $J$  = 7.7 Hz, 1H), 7.22 (m, 3H), 7.17 – 7.04 (m, 7H), 6.99 – 6.90 (m, 2H), 5.21 (s, 2H), 4.03 – 3.91 (m, 2H), 3.81 (s, 3H), 0.88 (d,  $J$  = 5.6 Hz, 3H).

**<sup>13</sup>C NMR** (101 MHz, Chloroform-*d*)  $\delta$  167.9 , 159.6 , 151.6 , 138.9 , 138.2 , 136.2 , 135.3 , 134.2 , 131.3 , 130.2 , 129.8 , 129.4 , 127.6 , 127.3 , 127.2 , 127.2 , 127.1 , 126.7 , 126.6 , 126.2 , 125.8 , 122.6 , 113.9 , 77.8 , 61.1 , 55.2 , 13.6 .

**HRMS** (ESI) Calculated for C<sub>33</sub>H<sub>28</sub>O<sub>4</sub> ([M]<sup>+</sup>+Na<sup>+</sup>) = 511.1880, Found 511.1877.

**IR** (neat) 2979, 2335, 1725, 1612, 1514, 1442, 1352, 1248, 1175, 1033, 979, 859, 762, 664, 597 cm<sup>-1</sup>.

### Diethyl 1-((4-methoxybenzyl)oxy)-4-phenylnaphthalene-2,3-dicarboxylate (A9)

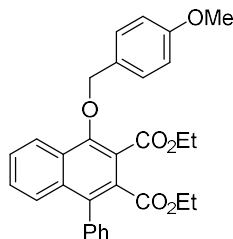

**Result:** 95% yield, white solid, Mp: 74–76 °C.

**<sup>1</sup>H NMR** (400 MHz, Chloroform-*d*) δ 8.26 (d, *J* = 8.4 Hz, 1H), 7.64 – 7.55 (m, 2H), 7.54 – 7.42 (m, 6H), 7.38 – 7.32 (m, 2H), 6.98 (d, *J* = 8.5 Hz, 2H), 5.20 (s, 2H), 4.38 (q, *J* = 7.0 Hz, 2H), 3.98 (q, *J* = 7.2 Hz, 2H), 3.85 (s, 3H), 1.34 (t, *J* = 7.1 Hz, 3H), 0.91 (t, *J* = 7.2 Hz, 3H).

**<sup>13</sup>C NMR** (101 MHz, Chloroform-*d*) δ 168.0 , 166.7 , 159.7 , 153.6 , 137.6 , 135.4 , 134.3 , 130.2 , 129.9 , 129.8 , 129.1 , 128.8 , 128.2 , 128.0 , 127.7 , 127.6 , 127.5 , 123.1 , 121.4 , 113.9 , 78.0 , 61.8 , 61.2 , 55.3 , 14.0 , 13.5 .

**HRMS** (ESI) Calculated for C<sub>30</sub>H<sub>28</sub>O<sub>6</sub> ([M]<sup>+</sup>+Na<sup>+</sup>) = 507.1778, Found 507.1783.

**IR** (neat) 2982, 2836, 1732, 1612, 1513, 1443, 1368, 1245, 1176, 1036, 953, 848, 765, 629, 516 cm<sup>-1</sup>.

### Ethyl 1-((4-methoxybenzyl)oxy)-2-naphthoate (A10)

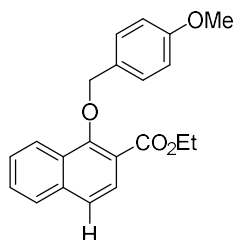

**Result:** 91% yield, colorless oil.

**<sup>1</sup>H NMR** (400 MHz, Chloroform-*d*) δ 8.27 (d, *J* = 8.4 Hz, 1H), 7.91 (d, *J* = 8.6 Hz, 1H), 7.86 (d, *J* = 7.9 Hz, 1H), 7.64 (d, *J* = 8.6 Hz, 1H), 7.61 – 7.55 (m, 1H), 7.52 (3, 3H), 6.97 (d, *J* = 8.7 Hz, 2H), 5.14 (s, 2H), 4.44 (q, *J* = 7.2 Hz, 2H), 3.84 (s, 3H), 1.42 (t, *J* = 7.1 Hz, 3H).

**<sup>13</sup>C NMR** (101 MHz, Chloroform-*d*) δ 166.3 , 159.5 , 156.6 , 136.6 , 129.8 , 129.3 , 128.7 , 128.1 , 127.7 , 126.7 , 126.4 , 123.80 , 123.6 , 120.0 , 113.8 , 77.4 , 61.1 , 55.2 , 14.3 .

**HRMS** (ESI) Calculated for C<sub>21</sub>H<sub>20</sub>O<sub>4</sub> ([M]<sup>+</sup>+Na<sup>+</sup>) = 359.1254, Found 359.1255.

**IR** (neat) 2980, 2836, 1719, 1612, 1513, 1463, 1365, 1276, 1213, 1174, 1032, 963, 849, 765, 519 cm<sup>-1</sup>.

### Ethyl 4-chloro-1-((4-methoxybenzyl)oxy)-2-naphthoate (A11)

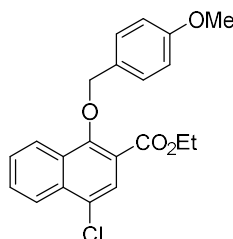

**Result:** 58% yield, white solid, Mp: 55–57 °C.

**<sup>1</sup>H NMR** (400 MHz, Chloroform-*d*) δ 8.26 (t, *J* = 8.2 Hz, 2H), 8.01 (s, 1H), 7.70 (m, 1H), 7.60 – 7.55 (m, 1H), 7.48 (d, *J* = 8.6 Hz, 2H), 6.95 (d, *J* = 8.5 Hz, 2H), 5.11 (s, 2H), 4.43 (d, *J* = 7.2 Hz, 2H), 3.84 (s, 3H), 1.41 (d, *J* = 7.1 Hz, 3H).

**<sup>13</sup>C NMR** (101 MHz, Chloroform-*d*) δ 165.1 , 159.7 , 155.8 , 133.6 , 130.0 , 129.3 , 129.0 , 127.2 , 126.9 , 126.5 , 124.7 , 124.4 , 120.1 , 113.9 , 77.8 , 61.4 , 55.3 , 14.3 .

**HRMS** (ESI) Calculated for C<sub>21</sub>H<sub>19</sub>ClO<sub>4</sub> ([M]<sup>+</sup>+Na<sup>+</sup>) = 393.0864, Found 393.0878.

**IR** (neat) 2980, 2835, 1723, 1613, 1514, 1413, 1350, 1269, 1174, 1034, 969, 856, 763, 697, 555 cm<sup>-1</sup>.

#### Ethyl 4-bromo-1-((4-methoxybenzyl)oxy)-2-naphthoate (A12)

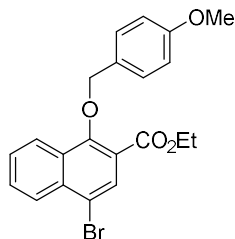

**Result:** 80% yield, white solid, Mp: 66–68 °C.

**<sup>1</sup>H NMR** (400 MHz, Chloroform-*d*) δ 8.26 (d, *J* = 8.1 Hz, 1H), 8.24 – 8.18 (m, 2H), 7.69 (td, *J* = 8.4, 6.9, 1.3 Hz, 1H), 7.57 (td, *J* = 8.2, 6.9, 1.2 Hz, 1H), 7.47 (d, *J* = 8.6 Hz, 2H), 6.95 (d, *J* = 8.7 Hz, 2H), 5.11 (s, 2H), 4.43 (q, *J* = 7.1 Hz, 2H), 3.84 (s, 3H), 1.42 (t, *J* = 7.2 Hz, 3H).

**<sup>13</sup>C NMR** (101 MHz, Chloroform-*d*) δ 164.9 , 159.7 , 156.5 , 134.8 , 130.2 , 130.1 , 130.0 , 129.6 , 128.9 , 127.3 , 127.2 , 124.4 , 120.5 , 117.2 , 113.9 , 77.8 , 61.4 , 55.3 , 14.3 .

**HRMS** (ESI) Calculated for C<sub>21</sub>H<sub>19</sub><sup>79</sup>BrO<sub>4</sub> ([M]<sup>+</sup>+Na<sup>+</sup>) = 437.0359, Found 437.0354.

**HRMS** (ESI) Calculated for C<sub>21</sub>H<sub>19</sub><sup>81</sup>BrO<sub>4</sub> ([M]<sup>+</sup>+Na<sup>+</sup>) = 439.0338, Found 439.0331.

**IR** (neat) 2980, 2835, 2316, 1723, 1613, 1513, 1411, 1325, 1267, 1174, 1034, 964, 855, 762, 582 cm<sup>-1</sup>.

#### Ethyl 1-((4-methoxybenzyl)oxy)-4-(4-methoxyphenyl)-2-naphthoate (A13)

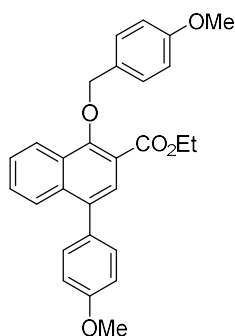

**Result:** 79% yield, white solid, Mp: 115–117 °C.

**<sup>1</sup>H NMR** (400 MHz, Chloroform-*d*) δ 8.34 (dd, *J* = 6.8, 3.0 Hz, 1H), 7.94 – 7.86 (m, 1H), 7.82 (s, 1H), 7.57 – 7.49 (m, 4H), 7.43 (d, *J* = 8.4 Hz, 2H), 7.05 (d, *J* = 8.4 Hz, 2H), 6.98 (d, *J* = 8.4 Hz, 2H), 5.16 (s, 2H), 4.43 (q, *J* = 7.1 Hz, 2H), 3.90 (s, 3H), 3.86 (s, 3H), 1.40 (t, *J* = 7.1 Hz, 3H).

**<sup>13</sup>C NMR** (101 MHz, Chloroform-*d*) δ 166.3 , 159.6 , 159.0 , 155.8 , 135.8 , 135.0 , 132.2 , 131.2 , 129.9 , 129.4 , 129.1 , 128.2 , 127.4 , 126.3 , 126.2 , 124.1 , 119.5 , 113.9 , 113.8 , 77.5 , 61.2 , 55.4 , 55.3 , 14.4 .

**HRMS** (ESI) Calculated for C<sub>28</sub>H<sub>26</sub>O<sub>5</sub> ([M]<sup>+</sup>+Na<sup>+</sup>) = 465.1672, Found 465.1680.

**IR** (neat) 2956, 2835, 2397, 1721, 1611, 1514, 1357, 1274, 1173, 1034, 970, 835, 764, 669, 594 cm<sup>-1</sup>.

#### Ethyl 4-(4-bromophenyl)-1-((4-methoxybenzyl)oxy)-2-naphthoate (A14)

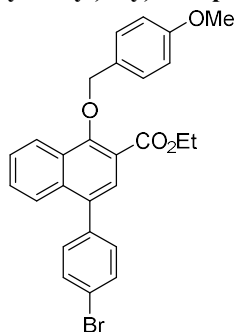

**Result:** 91% yield, white solid, Mp: 158–160 °C.

**<sup>1</sup>H NMR** (400 MHz, Chloroform-*d*) δ 8.41 – 8.28 (m, 1H), 7.93 – 7.74 (m, 2H), 7.64 (d, *J* = 8.3 Hz, 2H), 7.57 – 7.46 (m, 4H), 7.38 (d, *J* = 8.2 Hz, 2H), 6.98 (d, *J* = 8.5 Hz, 2H), 5.16 (s, 2H), 4.44 (q, *J* = 7.1 Hz, 2H), 3.86 (s, 3H), 1.40 (t, *J* = 7.1 Hz, 3H).

$^{13}\text{C}$  NMR (101 MHz, Chloroform-*d*)  $\delta$  166.1 , 159.7 , 156.4 , 138.7 , 134.8 , 134.5 , 131.7 , 131.5 , 130.0 , 129.3 , 129.1 , 128.5 , 127.5 , 126.5 , 125.9 , 124.2 , 121.7 , 119.5 , 113.9 , 77.6 , 61.3 , 55.3 , 14.4 .

HRMS (ESI) Calculated for  $\text{C}_{27}\text{H}_{23}^{79}\text{BrO}_4$  ( $[\text{M}+\text{Na}^+]$ ) = 513.0672, Found 513.0680.

HRMS (ESI) Calculated for  $\text{C}_{31}\text{H}_{25}^{81}\text{BrO}_3$  ( $[\text{M}+\text{Na}^+]$ ) = 515.0651, Found 515.0660.

IR (neat) 2980, 2835, 2280, 1721, 1613, 1513, 1487, 1174, 1034, 970, 857, 764, 593  $\text{cm}^{-1}$ .

#### Ethyl 1-((4-methoxybenzyl)oxy)-4-(thiophen-2-yl)-2-naphthoate (A15)

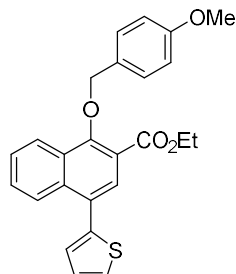

**Result:** 84% yield, white solid, Mp: 87–89 °C.

$^1\text{H}$  NMR (400 MHz, Chloroform-*d*)  $\delta$  8.33 (d,  $J$  = 8.3 Hz, 1H), 8.19 (d,  $J$  = 7.6 Hz, 1H), 7.99 (s, 1H), 7.63 – 7.51 (m, 4H), 7.45 (dd,  $J$  = 5.1, 1.2 Hz, 1H), 7.25 (dd,  $J$  = 3.5, 1.2 Hz, 1H), 7.20 (dd,  $J$  = 5.1, 3.4 Hz, 1H), 6.97 (d,  $J$  = 8.6 Hz, 2H), 5.15 (s, 2H), 4.44 (q,  $J$  = 7.1 Hz, 2H), 3.85 (s, 3H), 1.41 (t,  $J$  = 7.1 Hz, 3H).

$^{13}\text{C}$  NMR (101 MHz, Chloroform-*d*)  $\delta$  166.0 , 159.7 , 156.6 , 140.7 , 135.1 , 130.0 , 129.2 , 129.2 , 128.8 , 128.7 , 128.4 , 127.6 , 127.3 , 126.5 , 126.0 , 125.9 , 124.2 , 119.5 , 113.9 , 77.7 , 61.3 , 55.3 , 14.4 .

HRMS (ESI) Calculated for  $\text{C}_{25}\text{H}_{22}\text{O}_4\text{S}$  ( $[\text{M}+\text{Na}^+]$ ) = 441.1131, Found 441.1138.

IR (neat) 2983, 2835, 2397, 1721, 1612, 1513, 1357, 1302, 1274, 1033, 963, 826, 763, 605, 554  $\text{cm}^{-1}$ .

#### Ethyl 4-cyclopropyl-1-((4-methoxybenzyl)oxy)-2-naphthoate (A16)

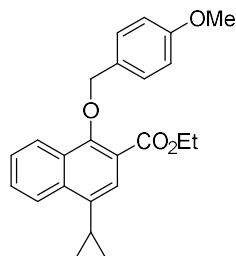

**Result:** 72% yield, white solid, Mp: 32–34 °C.

$^1\text{H}$  NMR (400 MHz, Chloroform-*d*)  $\delta$  8.42 (d,  $J$  = 8.3 Hz, 1H), 8.30 (d,  $J$  = 8.1 Hz, 1H), 7.69 (s, 1H), 7.65 (m, 1H), 7.57 – 7.50 (m, 3H), 6.97 (d,  $J$  = 8.6 Hz, 2H), 5.10 (s, 2H), 4.44 (q,  $J$  = 7.1 Hz, 2H), 3.85 (s, 3H), 2.32 – 2.25 (m, 1H), 1.42 (t,  $J$  = 7.1 Hz, 3H), 1.12 – 1.06 (m, 2H), 0.81 (td,  $J$  = 5.9, 4.2 Hz, 2H).

$^{13}\text{C}$  NMR (101 MHz, Chloroform-*d*)  $\delta$  166.6 , 159.5 , 155.2 , 136.6 , 134.9 , 129.8 , 129.4 , 128.7 , 128.0 , 126.1 , 124.6 , 124.2 , 119.4 , 113.8 , 77.4 , 61.1 , 55.2 , 14.3 , 13.0 , 6.2 .

HRMS (ESI) Calculated for  $\text{C}_{22}\text{H}_{24}\text{O}_4$  ( $[\text{M}+\text{Na}^+]$ ) = 399.1567, Found 399.1569.

IR (neat) 2998, 2835, 1720, 1613, 1571, 1372, 1269, 1174, 1034, 962, 896, 763, 668, 594  $\text{cm}^{-1}$ .



### Ethyl 1-((4-methoxybenzyl)oxy)-4-(3-phenylprop-2-yn-1-yl)-2-naphthoate (A17)

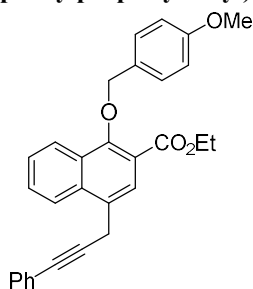

**Result:** 88% yield, white solid, Mp: 76–78 °C.

**<sup>1</sup>H NMR** (600 MHz, Chloroform-*d*) δ 8.33 (d, *J* = 8.4 Hz, 1H), 8.12 (d, *J* = 7.0 Hz, 2H), 7.67 (m, 1H), 7.56 (m, 1H), 7.52 (d, *J* = 8.4 Hz, 2H), 7.48 – 7.43 (m, 2H), 7.34 – 7.27 (m, 3H), 6.96 (d, *J* = 8.4 Hz, 2H), 5.12 (s, 2H), 4.44 (q, *J* = 7.1 Hz, 2H), 4.19 (s, 2H), 3.85 (s, 3H), 1.41 (t, *J* = 7.1 Hz, 3H).

**<sup>13</sup>C NMR** (151 MHz, Chloroform-*d*) δ 166.1 , 159.6 , 156.2 , 134.6 , 131.6 , 129.9 , 129.4 , 129.1 , 128.5 , 128.3 , 128.2 , 127.9 , 126.5 , 126.3 , 124.6 , 123.7 , 123.5 , 119.5 , 113.9 , 86.8 , 83.7 , 77.6 , 61.1 , 55.3 , 23.5 , 14.3 .

**HRMS** (ESI) Calculated for C<sub>30</sub>H<sub>26</sub>O<sub>4</sub> ([M]+Na<sup>+</sup>) = 473.1723, Found 473.1725.

**IR** (neat) 2980, 1719, 1615, 1513, 1459, 1392, 1304, 1274, 1174, 1083, 1031, 959, 823, 759 524 cm<sup>-1</sup>.

### Ethyl 1-((4-methoxybenzyl)oxy)-6-methyl-4-phenyl-2-naphthoate (A18)

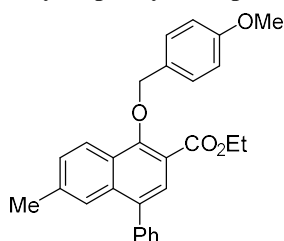

**Result:** 80% yield, white solid, Mp: 99–100 °C.

**<sup>1</sup>H NMR** (400 MHz, Chloroform-*d*) δ 8.25 (d, *J* = 8.6 Hz, 1H), 7.83 (s, 1H), 7.65 (s, 1H), 7.60 – 7.42 (m, 7H), 7.38 (d, *J* = 8.5 Hz, 1H), 6.99 (d, *J* = 8.4 Hz, 2H), 5.16 (s, 2H), 4.43 (q, *J* = 7.1 Hz, 2H), 3.86 (s, 3H), 2.45 (s, 3H), 1.40 (t, *J* = 7.1 Hz, 3H).

**<sup>13</sup>C NMR** (101 MHz, Chloroform-*d*) δ 166.2 , 159.6 , 156.3 , 140.0 , 138.5 , 135.4 , 135.1 , 130.1 , 129.9 , 129.5 , 128.5 , 128.3 , 127.7 , 127.3 , 127.2 , 125.2 , 124.0 , 118.5 , 113.9 , 77.5 , 61.1 , 55.3 , 22.0 , 14.4 .

**HRMS** (ESI) Calculated for C<sub>28</sub>H<sub>26</sub>O<sub>4</sub> ([M]+Na<sup>+</sup>) = 449.1723, Found 449.1730.

**IR** (neat) 2979, 2835, 1720, 1613, 1570, 1513, 1405, 1375, 1154, 1031, 979, 859, 797, 610, 559 cm<sup>-1</sup>.

### Ethyl 1-((4-methoxybenzyl)oxy)-4,6-diphenyl-2-naphthoate (A19)

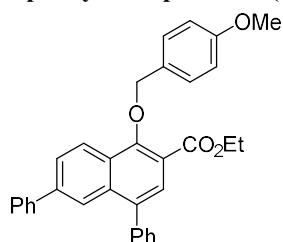

**Result:** 82% yield, White solid, Mp: 99-101 °C.

**<sup>1</sup>H NMR** (400 MHz, Chloroform-*d*) δ 8.43 (d, *J* = 8.7 Hz, 1H), 8.11 (s, 1H), 7.90 (s, 1H), 7.81 (dd, *J* = 8.7, 1.8 Hz, 1H), 7.63 – 7.51 (m, 8H), 7.46 (m, 3H), 7.37 (m, 1H), 7.00 (d, *J* = 8.4 Hz, 2H), 5.21 (s, 2H), 4.46 (q, *J* = 7.1 Hz, 2H), 3.87 (s, 3H), 1.42 (t, *J* = 7.1 Hz, 3H).

**<sup>13</sup>C NMR** (101 MHz, Chloroform-*d*) δ 166.1 , 159.6 , 156.1 , 140.9 , 140.6 , 139.8 , 136.3 , 135.1 , 130.1 , 130.0 , 129.4 , 128.9 , 128.4 , 128.2 , 128.1 , 127.7 , 127.5 , 127.5 , 126.0 , 124.8 , 124.1 , 119.4 , 113.94 , 77.6 , 61.2 , 55.3 , 14.4 .

**HRMS** (ESI) Calculated for C<sub>33</sub>H<sub>28</sub>O<sub>4</sub> ([M]+Na<sup>+</sup>) = 511.1880, Found 511.1880.

**IR** (neat) 2981, 2835, 1720, 1615, 1513, 1456, 1375, 1249, 1174, 1030, 972, 860, 763, 669, 560 cm<sup>-1</sup>.

### Ethyl 6-methoxy-1-((4-methoxybenzyl)oxy)-4-phenyl-2-naphthoate (A20)

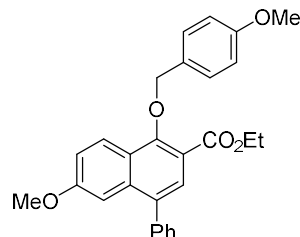

**Result:** 93% yield, white solid, Mp: 99–101 °C.

**<sup>1</sup>H NMR** (400 MHz, Chloroform-*d*) δ 8.25 (d, *J* = 9.0 Hz, 1H), 7.82 (s, 1H), 7.65 (s, 1H), 7.57 – 7.42 (m, 7H), 7.38 (d, *J* = 8.5 Hz, 1H), 6.99 (d, *J* = 7.4 Hz, 2H), 5.16 (s, 2H), 4.43 (q, *J* = 7.0 Hz, 2H), 3.86 (s, 3H), 2.45 (s, 3H), 1.45 – 1.37 (t, *J* = 7.1 Hz, 3H).

**<sup>13</sup>C NMR** (101 MHz, Chloroform-*d*) δ 166.2 , 159.6 , 156.3 , 140.1 , 138.5 , 135.4 , 135.1 , 130.1 , 129.9 , 129.5 , 128.5 , 128.3 , 127.7 , 127.3 , 127.2 , 125.2 , 124.0 , 118.54, 113.9 , 77.5 , 61.1 , 55.3 , 22.0 , 14.4 .

**HRMS** (ESI) Calculated for C<sub>28</sub>H<sub>26</sub>O<sub>5</sub> ([M]<sup>+</sup>+Na<sup>+</sup>) = 465.1672, Found 465.1679.

**IR** (neat) 2979, 2835, 1720, 1613, 1570, 1513, 1405, 1375, 1249, 1031, 979, 859, 797, 669, 559 cm<sup>-1</sup>.

### Ethyl 6-fluoro-1-((4-methoxybenzyl)oxy)-4-phenyl-2-naphthoate (A21)

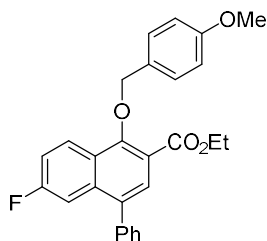

**Result:** 78% yield, white solid, Mp: 110–112 °C.

**<sup>1</sup>H NMR** (400 MHz, Chloroform-*d*) δ 8.32 (m, 1H), 7.89 (s, 1H), 7.54 – 7.41 (m, 8H), 7.29 (m, 1H), 6.97 (d, *J* = 8.5 Hz, 2H), 5.16 (s, 2H), 4.44 (q, *J* = 7.2 Hz, 2H), 3.86 (s, 3H), 1.41 (t, *J* = 7.2 Hz, 3H).

**<sup>13</sup>C NMR** (101 MHz, Chloroform-*d*) δ 166.0 , 163.7 , 161.2 , 159.7 , 156.3 , 139.3 , 136.2 , 135.5 , 130.0 , 129.9 , 129.1 , 128.8 , 128.5 , 127.7 , 127.2 , 127.1 , 126.2 , 118.7 , 116.6 , 116.4 , 113.9 , 110.1 , 109.8 , 77.8 , 61.2 , 55.3 , 14.4 .

**<sup>19</sup>F NMR** (377 MHz, Chloroform-*d*) δ -110.35 .

**HRMS** (ESI) Calculated for C<sub>27</sub>H<sub>23</sub>FO<sub>4</sub> ([M]<sup>+</sup>+Na<sup>+</sup>) = 453.1473, Found 453.1468.

**IR** (neat) 2980, 2836, 1721, 1622, 1513, 1459, 1353, 1248, 1184, 1031, 984, 863, 795, 609, 550 cm<sup>-1</sup>.

### Ethyl 6-chloro-1-((4-methoxybenzyl)oxy)-4-phenyl-2-naphthoate (A22)

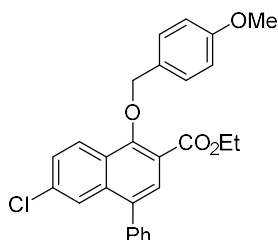

**Result:** 91% yield, white solid, Mp: 112–114 °C.

**<sup>1</sup>H NMR** (400 MHz, Chloroform-*d*) δ 8.25 (d, *J* = 9.0 Hz, 1H), 7.98 – 7.74 (m, 2H), 7.55 – 7.40 (m, 8H), 6.97 (d, *J* = 8.2 Hz, 2H), 5.15 (d, *J* = 2.4 Hz, 2H), 4.44 (q, *J* = 7.1 Hz, 2H), 3.86 (s, 3H), 1.40 (t, *J* = 7.1 Hz, 3H).

**<sup>13</sup>C NMR** (101 MHz, Chloroform-*d*) δ 165.9 , 159.7 , 156.1 , 139.1 , 135.5 , 135.3 , 134.8 , 130.0 , 123.0 , 129.1 , 128.8 , 128.5 , 127.7 , 127.5 , 127.2 , 126.0 , 125.1 , 119.6 , 114.0 , 77.9 , 61.3 , 55.3 , 14.3 .

**HRMS** (ESI) Calculated for C<sub>27</sub>H<sub>23</sub>ClO<sub>4</sub> ([M]<sup>+</sup>+Na<sup>+</sup>) = 469.1177, Found 469.1183.

**IR** (neat) 2980, 2835, 1721, 1611, 1514, 1449, 1352, 1246, 1174, 1030, 973, 883, 794, 608, 559 cm<sup>-1</sup>.

### Ethyl 6-bromo-1-((4-methoxybenzyl)oxy)-4-phenyl-2-naphthoate (A23)

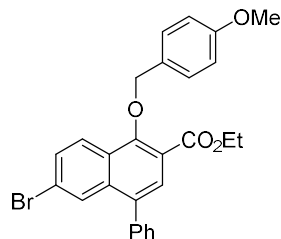

**Result:** 83% yield, white solid, Mp: 108–110 °C.

**<sup>1</sup>H NMR** (400 MHz, Chloroform-*d*) δ 8.17 (d, *J* = 10.0 Hz, 1H), 8.02 (m, 1H), 7.87 (d, *J* = 3.9 Hz, 1H), 7.59 (d, *J* = 9.0 Hz, 1H), 7.55 – 7.46 (m, 7H), 6.97 (d, *J* = 7.6 Hz, 2H), 5.15 (s, 2H), 4.43 (q, *J* = 7.2 Hz, 2H), 3.85 (s, 3H), 1.40 (t, *J* = 7.1 Hz, 3H).

**<sup>13</sup>C NMR** (101 MHz, Chloroform-*d*) δ 165.9, 159.7, 156.2, 139.1, 135.8, 135.2, 130.0, 130.0, 129.8, 129.1, 128.8, 128.6, 128.4, 127.7, 126.0, 123.4, 119.7, 114.0, 77.9, 61.3, 55.3, 14.3.

**HRMS** (ESI) Calculated for C<sub>27</sub>H<sub>23</sub><sup>79</sup>BrO<sub>4</sub> ([M]<sup>+</sup>+Na<sup>+</sup>) = 513.0672, Found 513.0683.

**HRMS** (ESI) Calculated for C<sub>27</sub>H<sub>23</sub><sup>81</sup>BrO<sub>4</sub> ([M]<sup>+</sup>+Na<sup>+</sup>) = 515.0651, Found 515.0662.

**IR** (neat) 2979, 2834, 1721, 1610, 1514, 1448, 1351, 1246, 1174, 1031, 971, 883, 793, 616, 559 cm<sup>-1</sup>.

### Ethyl 1-((4-methoxybenzyl)oxy)-4-phenyl-6-(trifluoromethoxy)-2-naphthoate (A24)

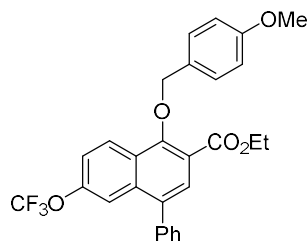

**Result:** 92% yield, white solid, Mp: 85–87 °C.

**<sup>1</sup>H NMR** (400 MHz, Chloroform-*d*) δ 8.36 (d, *J* = 9.1 Hz, 1H), 7.92 (s, 1H), 7.71 (s, 1H), 7.56 – 7.44 (m, 7H), 7.39 (d, *J* = 9.1 Hz, 1H), 6.98 (d, *J* = 8.4 Hz, 2H), 5.17 (s, 2H), 4.45 (q, *J* = 7.1 Hz, 2H), 3.86 (s, 3H), 1.41 (t, *J* = 7.1 Hz, 3H).

**<sup>13</sup>C NMR** (101 MHz, Chloroform-*d*) δ 165.9, 159.8, 156.0, 148.9, 139.0, 135.9, 135.4, 130.0, 129.9, 129.0, 129.0, 128.6, 127.8, 127.5, 126.8, 120.0, 119.8, 116.7, 114.0, 77.9, 61.4, 55.3, 14.3.

**<sup>19</sup>F NMR** (377 MHz, Chloroform-*d*) δ -57.51.

**HRMS** (ESI) Calculated for C<sub>28</sub>H<sub>23</sub>F<sub>3</sub>O<sub>5</sub> ([M]<sup>+</sup>+Na<sup>+</sup>) = 519.1390, Found 519.1396.

**IR** (neat) 2982, 2837, 1723, 1614, 1514, 1457, 1354, 1246, 1181, 962, 858, 797, 617, 521 cm<sup>-1</sup>.

### Ethyl 8-fluoro-1-((4-methoxybenzyl)oxy)-4-phenyl-2-naphthoate (A25)

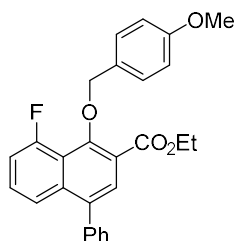

**Result:** 59% yield, white solid, Mp: 82–84 °C.

**<sup>1</sup>H NMR** (400 MHz, Chloroform-*d*) δ 7.77 (s, 1H), 7.66 (d, *J* = 8.5 Hz, 1H), 7.58 (d, *J* = 8.5 Hz, 2H), 7.51 – 7.40 (m, 6H), 7.22 (m, 1H), 7.00 – 6.94 (m, 2H), 5.14 (s, 2H), 4.39 (q, *J* = 7.1 Hz, 2H), 3.85 (s, 3H), 1.35 (t, *J* = 7.1 Hz, 3H).

**<sup>13</sup>C NMR** (101 MHz, Chloroform-*d*) δ 166.2, 160.6, 159.5, 158.1, 154.2, 139.7, 137.0, 136.3, 130.3, 130.2, 130.0, 129.3, 128.4, 128.3, 128.0, 127.9, 127.6, 122.7, 119.4, 113.8, 112.3, 112.1, 78.1, 61.4, 55.3, 14.3.

**<sup>19</sup>F NMR** (377 MHz, Chloroform-*d*) δ -114.02.

**HRMS** (ESI) Calculated for C<sub>27</sub>H<sub>23</sub>FO<sub>4</sub> ([M]<sup>+</sup>+Na<sup>+</sup>) = 453.1473, Found 453.1475.

**IR** (neat) 2981, 2835, 1725, 1614, 1514, 1463, 1373, 1248, 1176, 1045, 961, 856, 753, 670, 516 cm<sup>-1</sup>.

### Ethyl 1-((4-methoxybenzyl)oxy)-8-methyl-4-phenyl-2-naphthoate (A26)

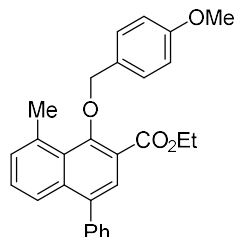

**Result:** 69% yield, white solid, Mp: 105–107 °C.

**<sup>1</sup>H NMR** (400 MHz, Chloroform-*d*) δ 7.76 (d, *J* = 4.5 Hz, 1H), 7.70 (d, *J* = 7.5 Hz, 1H), 7.53 – 7.41 (m, 7H), 7.36 (t, *J* = 7.7 Hz, 1H), 7.30 (d, *J* = 7.0 Hz, 1H), 6.96 (dd, *J* = 8.7, 2.5 Hz, 2H), 5.01 (s, 2H), 4.39 (q, *J* = 7.0 Hz, 2H), 3.85 (s, 3H), 2.92 (s, 3H), 1.35 (t, *J* = 7.1 Hz, 3H).

**<sup>13</sup>C NMR** (101 MHz, Chloroform-*d*) δ 166.8 , 159.4 , 157.6 , 140.6 , 136.7 , 136.2 , 136.1 , 130.1 , 129.9 , 129.6 , 129.1 , 128.4 , 128.3 , 127.5 , 127.3 , 124.9 , 121.0 , 113.7 , 78.4 , 61.2 , 55.3 , 24.9 , 14.3 .

**HRMS** (ESI) Calculated for C<sub>28</sub>H<sub>26</sub>O<sub>4</sub> ([M]<sup>+</sup>+Na<sup>+</sup>) = 449.1723, Found 449.1732.

**IR** (neat) 2977, 2934, 2835, 1721, 1611, 1513, 1456, 1355, 1246, 1175, 1033, 956, 861, 762, 559, cm<sup>-1</sup>.

### Ethyl 1-((4-methoxybenzyl)oxy)-5,7-dimethyl-4-phenyl-2-naphthoate (A27)

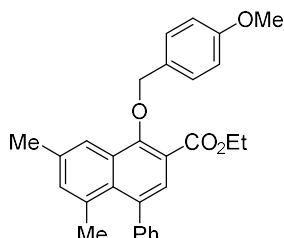

**Result:** 89% yield, white solid, Mp: 98–100 °C.

**<sup>1</sup>H NMR** (400 MHz, Chloroform-*d*) δ 8.08 (s, 1H), 7.68 (s, 1H), 7.58 (d, *J* = 8.4 Hz, 2H), 7.43 – 7.33 (m, 5H), 7.19 (s, 1H), 7.01 (d, *J* = 8.5 Hz, 2H), 5.15 (s, 2H), 4.42 (q, *J* = 6.8 Hz, 2H), 3.87 (s, 3H), 2.48 (s, 3H), 2.00 (s, 3H), 1.39 (t, *J* = 7.0 Hz, 3H).

**<sup>13</sup>C NMR** (101 MHz, Chloroform-*d*) δ 166.1 , 159.5 , 155.8 , 144.2 , 136.1 , 135.7 , 135.4 , 134.2 , 132.4 , 130.4 , 129.9 , 129.6 , 129.6 , 128.6 , 127.6 , 126.9 , 121.6 , 118.5 , 113.9 , 77.3 , 61.0 , 55.3 , 24.6 , 21.6 , 14.3 .

**HRMS** (ESI) Calculated for C<sub>29</sub>H<sub>28</sub>O<sub>4</sub> ([M]<sup>+</sup>+Na<sup>+</sup>) = 463.1880, Found 463.1881.

**IR** (neat) 2976, 2835, 1721, 1613, 1514, 1455, 1359, 1243, 1174, 1038, 985, 899, 764, 668, 518 cm<sup>-1</sup>.

### Ethyl 5,7-dibromo-1-((4-methoxybenzyl)oxy)-4-phenyl-2-naphthoate (A28)

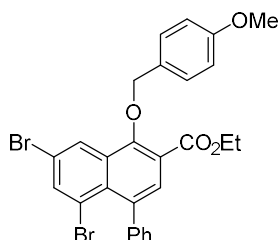

**Result:** 90% yield, white solid, Mp: 129–131 °C.

**<sup>1</sup>H NMR** (400 MHz, Chloroform-*d*) δ 8.47 (d, *J* = 2.1 Hz, 1H), 7.96 (d, *J* = 2.1 Hz, 1H), 7.84 (s, 1H), 7.48 (d, *J* = 8.4 Hz, 2H), 7.43 – 7.38 (m, 3H), 7.34 – 7.28 (m, 2H), 6.98 (d, *J* = 8.6 Hz, 2H), 5.14 (s, 2H), 4.42 (q, *J* = 7.1 Hz, 2H), 3.86 (s, 3H), 1.39 (t, *J* = 7.1 Hz, 3H).

**<sup>13</sup>C NMR** (101 MHz, Chloroform-*d*) δ 165.3 , 159.9 , 155.0 , 141.5 , 138.1 , 136.2 , 132.4 , 131.7 , 131.0 , 130.2 , 128.6 , 127.6 , 127.4 , 126.7 , 121.1 , 120.4 , 119.9 , 114.0 , 78.2 , 61.5 , 55.3 , 14.3 .

**HRMS** (ESI) Calculated for C<sub>27</sub>H<sub>22</sub><sup>79</sup>Br<sub>2</sub>O<sub>4</sub> ([M]<sup>+</sup>+Na<sup>+</sup>) = 590.9782, Found 590.0982.

**HRMS** (ESI) Calculated for C<sub>27</sub>H<sub>22</sub><sup>81</sup>Br<sub>2</sub>O<sub>4</sub> ([M]<sup>+</sup>+Na<sup>+</sup>) = 594.9736, Found 594.9744.

**HRMS** (ESI) Calculated for C<sub>27</sub>H<sub>22</sub><sup>79</sup>Br<sup>81</sup>BrO<sub>4</sub> ([M]<sup>+</sup>+Na<sup>+</sup>) = 592.9757, Found 592.9765.

**IR** (neat) 2979, 2834, 1723, 1612, 1514, 1465, 1374, 1250, 1186, 1032, 968, 864, 785, 631, 582 cm<sup>-1</sup>.

### Ethyl 5,7-dichloro-1-((4-methoxybenzyl)oxy)-4-phenyl-2-naphthoate (A29)

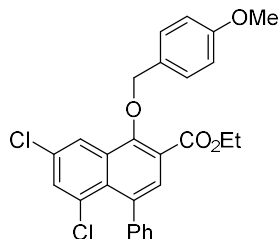

**Result:** 92% yield, white solid, Mp: 107–109 °C.

**<sup>1</sup>H NMR** (400 MHz, Chloroform-*d*) δ 8.26 (s, 1H), 7.83 – 7.77 (m, 1H), 7.56 (d, *J* = 2.2 Hz, 1H), 7.49 (d, *J* = 8.7 Hz, 2H), 7.39 (m, 3H), 7.34 – 7.29 (m, 2H), 6.97 (d, *J* = 8.6 Hz, 2H), 5.14 (s, 2H), 4.42 (q, *J* = 7.0 Hz, 2H), 3.85 (s, 3H), 1.42 – 1.36 (m, 3H).

**<sup>13</sup>C NMR** (101 MHz, Chloroform-*d*) δ 165.4 , 159.8 , 155.0 , 142.0 , 135.3 , 132.8 , 132.0 , 131.8 , 131.7 , 131.4 , 130.2 , 129.8 , 129.6 , 128.6 , 127.5 , 127.1 , 122.7 , 120.4 , 114.0 , 78.1 , 61.5 , 55.3 , 14.3 .

**HRMS** (ESI) Calculated for C<sub>27</sub>H<sub>22</sub>Cl<sub>2</sub>O<sub>4</sub> ([M]<sup>+</sup>+Na<sup>+</sup>) = 503.0787, Found 503.0778.

**IR** (neat) 2980, 2835, 1724, 1612, 1514, 1463, 1373, 1249, 1175, 1032, 956, 864, 764, 633, 592 cm<sup>-1</sup>.

### Ethyl 1-((4-methylbenzyl)oxy)-4-phenyl-2-naphthoate (A30)

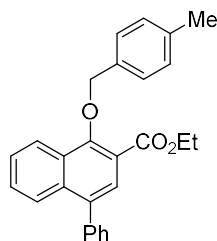

**Result:** 93% yield, white solid, Mp: 58-61 °C

**<sup>1</sup>H NMR** (400 MHz, Chloroform-*d*) δ 8.38 – 8.32 (m, 1H), 7.91 – 7.86 (m, 1H), 7.84 (s, 1H), 7.54 – 7.48 (m, 8H), 7.46 – 7.41 (m, 1H), 7.27 – 7.24 (m, 2H), 5.19 (s, 2H), 4.42 (q, *J* = 7.1 Hz, 2H), 2.40 (s, 3H), 1.38 (t, *J* = 7.2 Hz, 3H).

**<sup>13</sup>C NMR** (101 MHz, Chloroform-*d*) δ 166.3 , 156.1 , 139.8 , 137.9 , 136.1 , 134.8 , 134.2 , 130.1 , 129.2 , 129.0 , 128.3 , 128.2 , 128.2 , 127.5 , 127.4 , 126.3 , 126.2 , 124.1 , 119.5 , 77.7 , 61.2 , 21.3 , 14.3 .

**HRMS** (ESI) Calculated for C<sub>27</sub>H<sub>24</sub>O<sub>3</sub> ([M]<sup>+</sup>+Na<sup>+</sup>) = 419.1618, Found 419.1622.

**IR** (neat) 2980, 2277, 1722, 1617, 1508, 1452, 1414, 1357, 1275, 1249, 1171, 1126, 1021, 975, 805, 762, 611, 549 cm<sup>-1</sup>.

### Ethyl 1-((2-methoxybenzyl)oxy)-4-phenyl-2-naphthoate (A31)

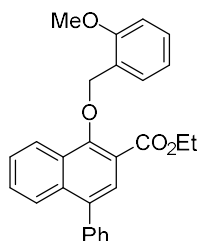

**Result:** 86% yield, white solid, Mp: 64-66 °C

**<sup>1</sup>H NMR** (400 MHz, Chloroform-*d*) δ 8.55 – 8.41 (m, 1H), 8.01 – 7.81 (m, 2H), 7.78 – 7.71 (m, 1H), 7.52 (m, 6H), 7.47 (m, 1H), 7.36 (m, 1H), 7.08 (m, 1H), 6.93 (m, 1H), 5.31 (d, *J* = 9.8 Hz, 2H), 4.42 (m, *J* = 7.3 Hz, 2H), 3.80 (d, *J* = 3.0 Hz, 3H), 1.37 (q, *J* = 6.9 Hz, 3H).

**<sup>13</sup>C NMR** (101 MHz, Chloroform-*d*) δ 166.4 , 157.2 , 156.5, 139.9 , 136.0 , 134.7 , 130.1 , 129.7 , 129.3 , 128.3 , 128.2 , 127.5 , 127.4 , 126.1 , 125.7 , 124.4 , 120.6 , 119.6 , 110.1 , 73.1 , 61.1 , 55.1 , 14.3 .

**HRMS** (ESI) Calculated for C<sub>31</sub>H<sub>26</sub>O<sub>4</sub> ([M]<sup>+</sup>+Na<sup>+</sup>) = 435.1567, Found 435.1568.

**IR** (neat) 2978, 1720, 1597, 1494, 1413, 1359, 1285, 1247, 1153, 1082, 1028, 970, 925, 866, 757, 616 cm<sup>-1</sup>.

### Ethyl 1-((4-(methylthio)benzyl)oxy)-4-phenyl-2-naphthoate (A32)

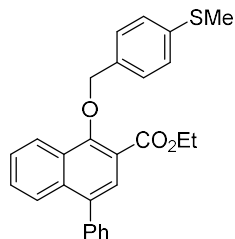

**Result:** 95% yield, white solid, Mp: 94–96 °C.

**<sup>1</sup>H NMR** (400 MHz, Chloroform-*d*) δ 8.36 – 8.29 (m, 1H), 7.92 – 7.88 (m, 1H), 7.86 (s, 1H), 7.56 – 7.49 (m, 8H), 7.48 – 7.43 (m, 1H), 7.34 (d, *J* = 8.2 Hz, 2H), 5.19 (s, 2H), 4.43 (q, *J* = 7.1 Hz, 2H), 2.53 (s, 3H), 1.39 (t, *J* = 7.1 Hz, 3H).

**<sup>13</sup>C NMR** (101 MHz, Chloroform-*d*) δ 166.2 , 156.0 , 139.8 , 138.5 , 136.3 , 134.8 , 134.1 , 130.1 , 128.9 , 128.7 , 128.3 , 128.3 , 127.5 , 127.4 , 126.6 , 126.4 , 126.3 , 123.9 , 119.5 , 77.3 , 61.2 , 15.9 , 14.3 .

**HRMS** (ESI) Calculated for C<sub>27</sub>H<sub>24</sub>O<sub>3</sub>S ([M]<sup>+</sup>+Na<sup>+</sup>) = 451.1338, Found 451.1341.

**IR** (neat) 2980, 2316, 1720, 1616, 1506, 1443, 1357, 1276, 1171, 1020, 970, 853, 766, 643, 590 cm<sup>-1</sup>.

### Ethyl 1-((3,4-dimethoxybenzyl)oxy)-4-phenyl-2-naphthoate (A33)

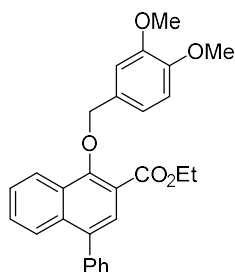

**Result:** 88% yield, white solid, Mp: 108–110 °C.

**<sup>1</sup>H NMR** (400 MHz, Chloroform-*d*) δ 8.38 – 8.32 (m, 1H), 7.95 – 7.87 (m, 1H), 7.85 (s, 1H), 7.55 – 7.44 (m, 7H), 7.20 (s, 1H), 7.11 (dd, *J* = 8.1, 2.0 Hz, 1H), 6.92 (d, *J* = 8.1 Hz, 1H), 5.18 (s, 2H), 4.43 (q, *J* = 7.1 Hz, 2H), 3.94 (d, *J* = 5.6 Hz, 6H), 1.40 (t, *J* = 7.1 Hz, 3H).

**<sup>13</sup>C NMR** (101 MHz, Chloroform-*d*) δ 166.2 , 156.0 , 149.0 , 139.8 , 136.1 , 134.8 , 130.1 , 129.8 , 129.0 , 128.3 , 128.3 , 127.4 , 127.4 , 126.3 , 126.2 , 124.1 , 120.9 , 119.4 , 111.6 , 110.9 , 77.8 , 61.1 , 55.9 , 55.9 , 14.3 .

**HRMS** (ESI) Calculated for C<sub>28</sub>H<sub>26</sub>O<sub>5</sub> ([M]<sup>+</sup>+Na<sup>+</sup>) = 465.1672, Found 465.1683.

**IR** (neat) 2935, 2834, 1720, 1613, 1569, 1462, 1357, 1248, 1156, 1028, 969, 855, 764, 634, 585 cm<sup>-1</sup>.

### Ethyl 4-phenyl-1-((3,4,5-trimethoxybenzyl)oxy)-2-naphthoate (A34)

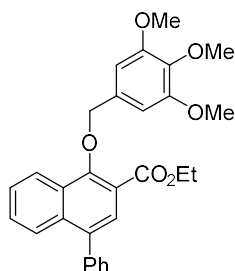

**Result:** 75% yield, white solid, Mp: 76–78 °C

**<sup>1</sup>H NMR** (400 MHz, Chloroform-*d*) δ 8.37 – 8.31 (m, 1H), 7.93 – 7.88 (m, 1H), 7.85 (s, 1H), 7.56 – 7.44 (m, 7H), 6.84 (s, 2H), 5.18 (s, 2H), 4.43 (q, *J* = 7.1 Hz, 2H), 3.91 (s, 6H), 3.89 (s, 3H), 1.39 (t, *J* = 7.1 Hz, 3H).

**<sup>13</sup>C NMR** (101 MHz, Chloroform-*d*) δ 166.1 , 155.9 , 153.3 , 139.7 , 137.7 , 136.3 , 134.8 , 132.9 , 130.0 , 129.0 , 128.3 , 128.3 , 127.5 , 127.4 , 126.3 , 126.3 , 124.0 , 119.5 , 105.1 , 77.8 , 61.2 , 60.9 , 56.1 , 14.3 .

**HRMS** (ESI) Calculated for C<sub>29</sub>H<sub>28</sub>O<sub>6</sub> ([M]<sup>+</sup>+Na<sup>+</sup>) = 495.1778, Found 495.1782.

IR (neat) 2931, 2836, 1720, 1507, 1421, 1357, 1247, 1151, 1010, 972, 834, 764, 669, 586  $\text{cm}^{-1}$ .

**Ethyl 1-((3-fluoro-4-methoxybenzyl)oxy)-4-phenyl-2-naphthoate (A35)**

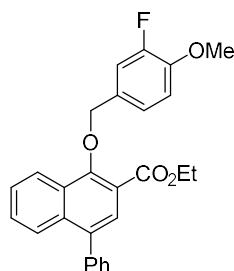

**Result:** 88% yield, white solid, Mp: 82–84 °C.

**$^1\text{H NMR}$**  (400 MHz, Chloroform-*d*)  $\delta$  8.33 (m, 1H), 7.92 – 7.88 (m, 1H), 7.86 (s, 1H), 7.57 – 7.42 (m, 8H), 7.31 (d,  $J = 8.5$  Hz, 1H), 7.02 (t,  $J = 8.4$  Hz, 1H), 5.16 (s, 2H), 4.44 (q,  $J = 7.1$  Hz, 2H), 3.94 (s, 3H), 1.40 (t,  $J = 7.1$  Hz, 3H).

**$^{13}\text{C NMR}$**  (101 MHz, Chloroform-*d*)  $\delta$  166.0 , 155.8 , 153.5 , 151.1, 147.6 , 147.5 , 139.7 , 136.3 , 134.8 , 130.2 , 130.2 , 130.1 , 128.9 , 128.3 , 128.3 , 127.5 , 127.4 , 126.4 , 126.3 , 124.2 , 124.2 , 123.8 , 119.5 , 116.3 , 116.2 , 113.2 , 113.2 , 76.7 , 61.2 , 56.3 , 14.3 .

**$^{19}\text{F NMR}$**  (377 MHz, Chloroform-*d*)  $\delta$  -135.00 .

**HRMS** (ESI) Calculated for  $\text{C}_{27}\text{H}_{23}\text{FO}_4$  ( $[\text{M}+\text{Na}^+]$ ) = 453.1473, Found 453.1475.

IR (neat) 2979, 2840, 2279, 1720, 1619, 1519, 1442, 1357, 1277, 1171, 1027, 973, 870, 761, 631  $\text{cm}^{-1}$ .

**Ethyl 1-((3-chloro-4-methoxybenzyl)oxy)-4-phenyl-2-naphthoate (A36)**

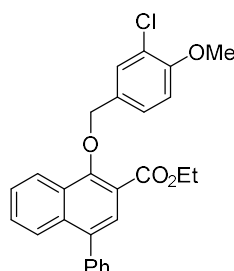

**Result:** 91% yield, white solid, Mp: 78–80 °C.

**$^1\text{H NMR}$**  (400 MHz, Chloroform-*d*)  $\delta$  8.33 (m, 1H), 7.91 (m, 1H), 7.86 (d,  $J = 2.7$  Hz, 1H), 7.68 (s, 1H), 7.58 – 7.45 (m, 8H), 7.00 (d,  $J = 8.4$  Hz, 1H), 5.15 (s, 2H), 4.44 (q,  $J = 7.2$  Hz, 2H), 3.95 (s, 3H), 1.40 (t,  $J = 7.1$  Hz, 3H).

**$^{13}\text{C NMR}$**  (101 MHz, Chloroform-*d*)  $\delta$  166.0 , 155.8 , 154.9 , 139.7 , 136.4 , 134.8 , 130.4 , 130.3 , 130.1 , 128.9 , 128.3 , 127.8 , 127.5 , 127.4 , 126.5 , 126.3 , 123.8 , 122.4 , 119.5 , 111.9 , 76.6 , 61.2 , 56.2 , 14.3 .

**HRMS** (ESI) Calculated for  $\text{C}_{27}\text{H}_{23}\text{ClO}_4$  ( $[\text{M}+\text{Na}^+]$ ) = 469.1177, Found 469.1183.

IR (neat) 2978, 2838, 1720, 1607, 1569, 1442, 1384, 1279, 1171, 1023, 973, 876, 739, 620, 564  $\text{cm}^{-1}$ .

**Ethyl 1-((3-bromo-4-methoxybenzyl)oxy)-4-phenyl-2-naphthoate (A37)**

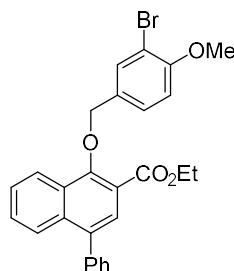

**Result:** 85% yield, white solid, Mp: 98–100 °C.

**$^1\text{H NMR}$**  (400 MHz, Chloroform-*d*)  $\delta$  8.41 – 8.23 (m, 1H), 8.00 – 7.75 (m, 3H), 7.53 (m, 8H), 6.97 (d,  $J = 7.5$  Hz, 1H), 5.14 (s, 2H), 4.56 – 4.33 (m, 2H), 3.94 (s, 3H), 1.40 (t,  $J = 5.7$  Hz, 3H).

$^{13}\text{C}$  NMR (101 MHz, Chloroform-*d*)  $\delta$  166.1 , 155.7 , 139.7 , 136.4 , 134.8 , 133.4 , 130.9 , 130.1 , 128.9 , 128.6 , 128.3 , 127.5 , 127.4 , 126.5 , 126.3 , 123.8 , 119.5 , 111.8 , 111.6 , 76.5 , 61.2 , 56.3 , 14.3.

HRMS (ESI) Calculated for  $\text{C}_{27}\text{H}_{23}^{79}\text{BrO}_4$  ( $[\text{M}]+\text{Na}^+$ ) = 513.0672, Found 513.0679.

HRMS (ESI) Calculated for  $\text{C}_{27}\text{H}_{23}^{79}\text{BrO}_4$  ( $[\text{M}]+\text{Na}^+$ ) = 513.0672, Found 513.0679.

HRMS (ESI) Calculated for  $\text{C}_{27}\text{H}_{23}^{81}\text{BrO}_4$  ( $[\text{M}]+\text{Na}^+$ ) = 515.0651, Found 515.0659.

IR (neat) 2978, 2837, 2277, 1720, 1604, 1569, 1455, 1355, 1278, 1082, 1021, 973, 899, 763, 673, 555  $\text{cm}^{-1}$ .

#### Ethyl 1-(benzofuran-5-ylmethoxy)-4-phenyl-2-naphthoate (A38)

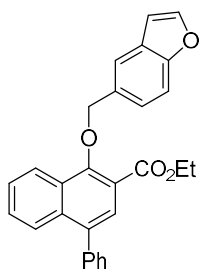

**Result:** 89% yield, white solid, Mp: 93–95 °C.

$^1\text{H}$  NMR (400 MHz, Chloroform-*d*)  $\delta$  8.42 – 8.35 (m, 1H), 7.91 (m, 3H), 7.68 (s, 1H), 7.59 (s, 2H), 7.54 (m, 6H), 7.47 (m, 1H), 6.84 (s, 1H), 5.34 (s, 2H), 4.45 (q,  $J$  = 6.4, 5.6 Hz, 2H), 1.40 (t,  $J$  = 7.1 Hz, 3H).

$^{13}\text{C}$  NMR (101 MHz, Chloroform-*d*)  $\delta$  166.2 , 156.0 , 154.8 , 145.5 , 139.8 , 136.2 , 134.8 , 131.8 , 130.1 , 129.0 , 128.3 , 128.3 , 127.6 , 127.4 , 126.4 , 126.3 , 124.9 , 124.0 , 121.3 , 119.5 , 111.4 , 106.7 , 78.0 , 61.2 , 14.3 .

HRMS (ESI) Calculated for  $\text{C}_{28}\text{H}_{22}\text{O}_4$  ( $[\text{M}]+\text{Na}^+$ ) = 445.1410, Found 445.1412.

IR (neat) 2981, 2311, 1720, 1616, 1595, 1444, 1359, 1274, 1152, 1031, 973, 885, 762, 669  $\text{cm}^{-1}$ .

#### Ethyl 1-((2,3-dihydrobenzofuran-5-yl)methoxy)-4-phenyl-2-naphthoate (A39)

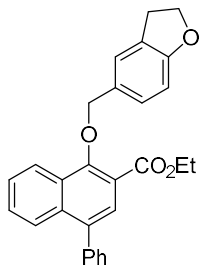

**Result:** 96% yield, white solid, Mp: 97–99 °C.

$^1\text{H}$  NMR (400 MHz, Chloroform-*d*)  $\delta$  8.38 (d,  $J$  = 9.2 Hz, 1H), 8.03 – 7.77 (m, 2H), 7.58 – 7.43 (m, 8H), 7.36 (d,  $J$  = 8.0 Hz, 1H), 6.86 (d,  $J$  = 8.0 Hz, 1H), 5.15 (s, 2H), 4.63 (t,  $J$  = 8.7 Hz, 2H), 4.46 (dd,  $J$  = 8.7, 5.4 Hz, 2H), 3.28 (t,  $J$  = 8.7 Hz, 2H), 1.42 (t,  $J$  = 7.1 Hz, 3H).

$^{13}\text{C}$  NMR (101 MHz, Chloroform-*d*)  $\delta$  166.1 , 160.2 , 156.1 , 139.8 , 136.1 , 134.8 , 130.1 , 129.2 , 129.0 , 128.8 , 128.3 , 128.2 , 127.4 , 127.4 , 126.3 , 126.2 , 125.6 , 124.1 , 119.5 , 109.1 , 77.9 , 71.4 , 61.1 , 29.6 , 14.4 .

HRMS (ESI) Calculated for  $\text{C}_{28}\text{H}_{24}\text{O}_4$  ( $[\text{M}]+\text{Na}^+$ ) = 447.1567 Found 447.1569.

IR (neat) 2918, 2896, 1720, 1615, 1568, 1444, 1356, 1249, 1171, 1021, 980, 814, 764, 673  $\text{cm}^{-1}$ .



**Ethyl 1-(benzo[d][1,3]dioxol-5-ylmethoxy)-4-phenyl-2-naphthoate (A40)**

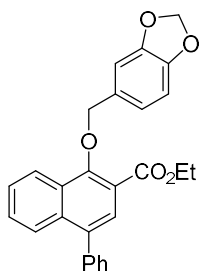

**Result:** 98% yield, white solid, Mp: 59–61 °C.

**<sup>1</sup>H NMR** (400 MHz, Chloroform-*d*) δ 8.37 – 8.32 (m, 1H), 7.93 – 7.88 (m, 1H), 7.86 (s, 1H), 7.57 – 7.49 (m, 6H), 7.48 – 7.43 (m, 1H), 7.20 (s, 1H), 7.06 (dd, *J* = 7.9, 1.7 Hz, 1H), 6.88 (d, *J* = 7.9 Hz, 1H), 6.01 (s, 2H), 5.13 (s, 2H), 4.45 (q, *J* = 7.1 Hz, 2H), 1.41 (t, *J* = 7.2 Hz, 3H).

**<sup>13</sup>C NMR** (101 MHz, Chloroform-*d*) δ 166.1 , 155.9 , 147.8 , 147.6 , 139.8 , 136.2 , 134.8 , 131.0 , 130.1 , 129.0 , 128.3 , 128.3 , 127.4 , 126.4 , 126.3 , 124.0 , 122.1 , 119.5 , 109.1 , 108.2 , 101.1 , 77.6 , 61.2 , 14.4 .

**HRMS** (ESI) Calculated for C<sub>27</sub>H<sub>22</sub>O<sub>5</sub> ([M]+Na<sup>+</sup>) = 449.1359, Found 449.1362.

**IR** (neat) 2981, 2355, 1720, 1616, 1444, 1369, 1350, 1275, 1151, 1038, 971, 864, 765, 667 cm<sup>-1</sup>.

**Ethyl 1-((2,3-dihydrobenzo[b][1,4]dioxin-6-yl)methoxy)-4-phenyl-2-naphthoate (A41)**

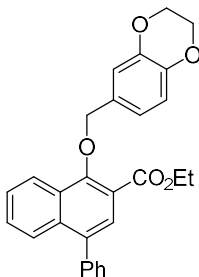

**Result:** 93% yield, colorless oil.

**<sup>1</sup>H NMR** (400 MHz, Chloroform-*d*) δ 8.37 (m, 1H), 7.90 (m, 1H), 7.86 (s, 1H), 7.58 – 7.49 (m, 6H), 7.46 (m, 1H), 7.20 (d, *J* = 2.0 Hz, 1H), 7.11 (m, 1H), 6.95 (d, *J* = 8.2 Hz, 1H), 5.12 (s, 2H), 4.45 (q, *J* = 7.1 Hz, 2H), 4.30 (s, 4H), 1.42 (t, *J* = 7.1 Hz, 3H).

**<sup>13</sup>C NMR** (101 MHz, Chloroform-*d*) δ 166.2 , 155.9 , 143.6 , 143.5 , 139.8 , 136.1 , 134.8 , 130.4 , 130.1 , 129.0 , 128.3 , 128.2 , 127.4 , 127.4 , 126.3 , 126.2 , 124.0 , 121.6 , 119.5 , 117.5 , 117.3 , 64.4 , 64.3 , 61.2 , 14.4 .

**HRMS** (ESI) Calculated for C<sub>28</sub>H<sub>24</sub>O<sub>5</sub> ([M]+Na<sup>+</sup>) = 463.1516, Found 463.1516.

**IR** (neat) 2979, 2875, 2343, 1720, 1617, 1569, 1434, 1355, 1249, 1021, 971, 887, 765, 603, 583 cm<sup>-1</sup>.

**Ethyl 1-((4-methoxynaphthalen-1-yl)methoxy)-4-phenyl-2-naphthoate (A42)**

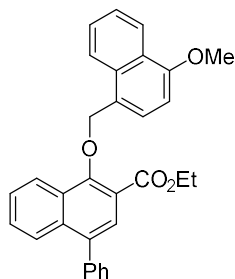

**Result:** 55% yield, white solid, Mp: 41–43 °C.

**<sup>1</sup>H NMR** (400 MHz, Chloroform-*d*) δ 8.40 – 8.35 (m, 2H), 8.26 (d, *J* = 8.1 Hz, 1H), 7.89 (d, *J* = 8.3 Hz, 1H), 7.86 (s, 1H), 7.66 – 7.61 (m, 1H), 7.57 (d, *J* = 7.9 Hz, 2H), 7.53 – 7.42 (m, 7H), 6.83 (d, *J* = 7.8 Hz, 1H), 5.64 (s, 2H), 4.37 (q, *J* = 7.1 Hz, 2H), 4.05 (s, 3H), 1.37 (t, *J* = 7.1 Hz, 3H).

**<sup>13</sup>C NMR** (101 MHz, Chloroform-*d*) δ 166.5 , 156.4 , 156.0 , 139.9 , 136.0 , 134.8 , 132.7 , 130.1 , 129.1 , 128.3 , 128.2 , 127.5 , 127.4 , 127.4 , 127.0 , 126.2 , 126.1 , 125.3 , 125.3 , 124.4 , 124.1 , 122.5 , 119.7 , 103.0 , 76.1 , 61.2 , 55.5 , 14.29 .

**HRMS** (ESI) Calculated for  $C_{27}H_{22}O_5$  ( $[M]+Na^+$ ) = 499.1359, Found 499.1362.

**IR** (neat) 2978, 2343, 1719, 1617, 1511, 1414, 1354, 1250, 1152, 1024, 996, 867, 766, 631, 585  $cm^{-1}$ .

**Ethyl 1-(furan-2-ylmethoxy)-4-phenyl-2-naphthoate (A43)**

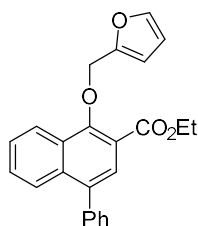

**Result:** 86% yield, white solid, Mp: 85–87 °C.

**$^1H$  NMR** (400 MHz, Chloroform-*d*)  $\delta$  8.38 (d,  $J$  = 7.3 Hz, 1H), 7.90 (m, 1H), 7.87 (s, 1H), 7.60 – 7.53 (m, 2H), 7.51 (m, 4H), 7.48 – 7.44 (m, 1H), 7.41 (m, 1H), 7.22 (m, 1H), 7.07 (dd,  $J$  = 5.1, 3.5 Hz, 1H), 5.40 (s, 2H), 4.47 (q,  $J$  = 7.2 Hz, 2H), 1.44 (t,  $J$  = 7.1 Hz, 3H).

**$^{13}C$  NMR** (101 MHz, Chloroform-*d*)  $\delta$  166.1, 155.5, 139.7, 139.2, 136.5, 134.8, 130.1, 129.0, 128.3, 127.6, 127.5, 127.4, 126.8, 126.7, 126.4, 126.2, 124.0, 119.5, 71.9, 61.3, 14.4.

**HRMS** (ESI) Calculated for  $C_{24}H_{20}O_4$  ( $[M]+Na^+$ ) = 395.1254, Found 395.1250.

**IR** (neat) 2980, 2871, 2396, 1719, 1616, 1569, 1413, 1275, 1171, 1021, 971, 856, 761, 669, 581  $cm^{-1}$ .

**Ethyl 4-phenyl-1-(thiophen-2-ylmethoxy)-2-naphthoate (A44)**

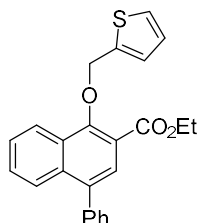

**Result:** 90% yield, white solid, Mp: 88–90 °C.

**$^1H$  NMR** (400 MHz, Chloroform-*d*)  $\delta$  8.39 (m, 1H), 8.00 – 7.76 (m, 2H), 7.53 (m, 8H), 6.45 (d,  $J$  = 30.9 Hz, 2H), 5.21 (s, 2H), 4.46 (q,  $J$  = 7.2 Hz, 2H), 1.45 (t,  $J$  = 7.2 Hz, 3H).

**$^{13}C$  NMR** (101 MHz, Chloroform-*d*)  $\delta$  166.1, 155.5, 150.7, 143.3, 139.8, 136.5, 134.8, 130.1, 129.1, 128.3, 127.4, 127.4, 126.4, 126.2, 124.1, 119.6, 110.6, 110.5, 69.2, 61.3, 14.3.

**HRMS** (ESI) Calculated for  $C_{24}H_{20}O_3S$  ( $[M]+Na^+$ ) = 411.1025, Found 411.1029.

**IR** (neat) 2981, 2354, 1720, 1616, 1568, 1413, 1383, 1275, 1152, 1017, 973, 884, 764, 601, 586  $cm^{-1}$ .

**Ethyl 1-(1-(4-methoxyphenyl)ethoxy)-2-naphthoate (A45)**

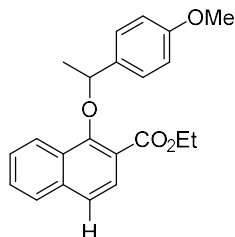

**Result:** 64% yield, colorless oil.

**$^1H$  NMR** (600 MHz, Chloroform-*d*)  $\delta$  8.22 (d,  $J$  = 8.4 Hz, 1H), 7.90 – 7.68 (m, 2H), 7.56 (d,  $J$  = 8.6 Hz, 1H), 7.52 (t,  $J$  = 7.5 Hz, 1H), 7.47 – 7.42 (m, 1H), 7.31 (d,  $J$  = 8.7 Hz, 2H), 6.83 (d,  $J$  = 8.6 Hz, 2H), 5.28 (q,  $J$  = 6.4 Hz, 1H), 4.40 – 4.29 (m, 2H), 3.77 (s, 3H), 1.66 (d,  $J$  = 6.5 Hz, 3H), 1.36 (t,  $J$  = 7.1 Hz, 3H).

**$^{13}C$  NMR** (151 MHz, Chloroform-*d*)  $\delta$  167.1, 159.3, 155.0, 136.3, 133.8, 129.5, 128.0, 127.9, 127.5, 126.5, 125.9, 124.3, 123.1, 120.6, 113.5, 83.4, 61.1, 55.2, 22.2, 14.2.

**HRMS** (ESI) Calculated for  $C_{22}H_{22}O_4$  ( $[M]+Na^+$ ) = 373.1410, Found 373.1408.

**IR** (neat) 2978, 1711, 1613, 1566, 1512, 1461, 1371, 1275, 1176, 1078, 1032, 930, 828, 767, 548  $cm^{-1}$ .

### 1-((4-methoxybenzyl)oxy)-4-phenyl-2-naphthonitrile (A46)

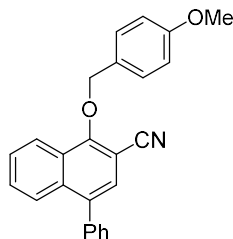

**Result:** 79% yield, white solid, Mp: 130–112 °C.

**<sup>1</sup>H NMR** (400 MHz, Chloroform-*d*) δ 8.30 (dd, *J* = 6.5, 3.2 Hz, 1H), 7.88 (dd, *J* = 6.4, 3.4 Hz, 1H), 7.64 – 7.39 (m, 10H), 6.98 (d, *J* = 8.7 Hz, 2H), 5.44 (s, 2H), 3.85 (s, 3H).

**<sup>13</sup>C NMR** (101 MHz, Chloroform-*d*) δ 160.0 , 159.4 , 138.6 , 136.7 , 134.7 , 130.5 , 129.9 , 129.3 , 128.5 , 128.1 , 127.9 , 127.4 , 127.0 , 126.5 , 123.4 , 117.7 , 114.1 , 99.3 , 55.3 .

**HRMS** (ESI) Calculated for C<sub>31</sub>H<sub>25</sub>NO<sub>3</sub> ([M]<sup>+</sup>+Na<sup>+</sup>) = 482.1727, Found 482.1728.

**IR** (neat) 3058, 2835, 2223, 1612, 1514, 1411, 1357, 1275, 1169, 1033, 966, 857, 766, 687, 555 cm<sup>-1</sup>.

### 1-((4-methoxybenzyl)oxy)-2-(methoxymethyl)-4-phenylnaphthalene (A47)

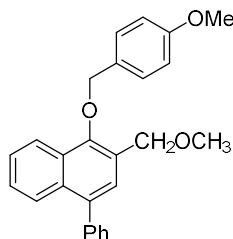

**Result:** 69% yield, white solid, Mp: 101-103 °C.

**<sup>1</sup>H NMR** (400 MHz, Chloroform-*d*) δ 8.27 (d, *J* = 9.1 Hz, 1H), 7.93 (d, *J* = 8.4 Hz, 1H), 7.58 – 7.41 (m, 10H), 7.01 (d, *J* = 8.6 Hz, 2H), 5.07 (s, 2H), 4.69 (s, 2H), 3.87 (s, 3H), 3.45 (s, 3H).

**<sup>13</sup>C NMR** (101 MHz, Chloroform-*d*) δ 159.7 , 152.4 , 140.4 , 136.6 , 132.8 , 130.1 , 129.8 , 129.5 , 128.3 , 128.2 , 128.1 , 127.1 , 126.4 , 126.4 , 126.2 , 125.8 , 122.6 , 114.0 , 77.1 , 69.5 , 58.4 , 55.3 .

**HRMS** (ESI) Calculated for C<sub>26</sub>H<sub>24</sub>O<sub>3</sub> ([M]<sup>+</sup>+Na<sup>+</sup>) = 407.1618, Found 407.1624.

**IR** (neat) 2929, 2834, 2310, 1611, 1513, 1414, 1363, 1248, 1165, 1033, 972, 892, 764, 668, 569 cm<sup>-1</sup>.

### 1-((4-methoxybenzyl)oxy)-N,4-diphenyl-2-naphthamide (A48)

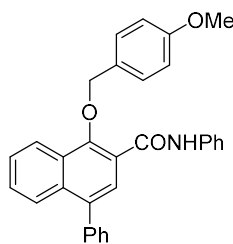

**Result:** 50% yield, white solid, Mp: 159–161 °C.

**<sup>1</sup>H NMR** (400 MHz, Chloroform-*d*) δ 9.97 (s, 1H), 8.40 (d, *J* = 7.6 Hz, 1H), 8.19 (s, 1H), 7.99 (d, *J* = 8.3 Hz, 1H), 7.65 (t, *J* = 7.0 Hz, 1H), 7.60 – 7.49 (m, 7H), 7.44 (m, 3H), 7.33 (t, *J* = 7.7 Hz, 2H), 7.15 – 7.10 (m, 1H), 6.92 (d, *J* = 8.4 Hz, 2H), 5.14 (s, 2H), 3.84 (s, 3H).

**<sup>13</sup>C NMR** (101 MHz, Chloroform-*d*) δ 163.4 , 160.2 , 153.0 , 139.6 , 138.3 , 137.4 , 134.8 , 130.5 , 130.1 , 128.9 , 128.3 , 128.1 , 128.1 , 127.6 , 127.5 , 126.7 , 126.6 , 124.0 , 123.2 , 122.3 , 119.8 , 114.2 , 78.8 , 55.3 .

**HRMS** (ESI) Calculated for C<sub>31</sub>H<sub>25</sub>NO<sub>3</sub> ([M]<sup>+</sup>+Na<sup>+</sup>) = 482.1727, Found 482.1728.

**IR** (neat) 3746, 3006, 2397, 1669, 1514, 1442, 1361, 1275, 1175, 1032, 957, 824, 763, 668, 565 cm<sup>-1</sup>.

### Ethyl 1-((4-methoxybenzyl)oxy)-4-nitro-2-naphthoate (A49)

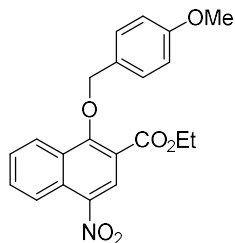

**Result:** 42% yield, yellow solid, Mp: 60-62 °C

**<sup>1</sup>H NMR** (400 MHz, Chloroform-*d*) δ 8.78 (s, 1H), 8.64 (dd, *J* = 8.9, 4.1 Hz, 1H), 8.34 (d, *J* = 8.7 Hz, 1H), 7.83 – 7.77 (m, 1H), 7.66 – 7.60 (m, 1H), 7.43 (d, *J* = 8.6 Hz, 2H), 6.93 (d, *J* = 7.8 Hz, 2H), 5.20 (s, 2H), 4.47 (q, *J* = 7.1 Hz, 2H), 3.83 (s, 3H), 1.45 (t, *J* = 7.1 Hz, 3H).

**<sup>13</sup>C NMR** (101 MHz, Chloroform-*d*) δ 164.2 , 161.5 , 159.9 , 141.6 , 131.5 , 130.2 , 129.9 , 128.1 , 128.1 , 127.8 , 126.6 , 124.8 , 123.5 , 117.9 , 114.0 , 78.6 , 61.9 , 55.3 , 14.3 .

**HRMS** (ESI) Calculated for C<sub>21</sub>H<sub>19</sub>NO<sub>6</sub> ([M]<sup>+</sup>+Na<sup>+</sup>) = 404.1105, Found 404.1109.

**IR** (neat) 2981, 2837, 2282, 1725, 1613, 1515, 1415, 1272, 1174, 1031, 996, 859, 765, 686, 565 cm<sup>-1</sup>.

### 3-Ethyl 1-methyl 4-((4-methoxybenzyl)oxy)naphthalene-1,3-dicarboxylate (A50)

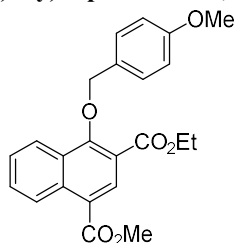

**Result:** 50% yield, white solid, Mp: 74-76 °C

**<sup>1</sup>H NMR** (400 MHz, Chloroform-*d*) δ 8.98 (d, *J* = 8.4 Hz, 1H), 8.65 (s, 1H), 8.31 (d, *J* = 8.4 Hz, 1H), 7.70 (m, 1H), 7.58 – 7.53 (m, 1H), 7.45 (d, *J* = 8.6 Hz, 2H), 6.94 (d, *J* = 8.6 Hz, 2H), 5.15 (s, 2H), 4.45 (q, *J* = 7.2 Hz, 2H), 4.01 (s, 3H), 3.83 (s, 3H), 1.43 (t, *J* = 7.1 Hz, 3H).

**<sup>13</sup>C NMR** (101 MHz, Chloroform-*d*) δ 167.1 , 165.6 , 160.4 , 159.8 , 134.5 , 132.1 , 130.0 , 130.0 , 129.4 , 128.7 , 126.7 , 126.0 , 124.3 , 122.5 , 118.6 , 113.9 , 78.0 , 61.5 , 55.3 , 52.2 , 14.4 .

**HRMS** (ESI) Calculated for C<sub>23</sub>H<sub>22</sub>O<sub>6</sub> ([M]<sup>+</sup>+Na<sup>+</sup>) = 417.1309, Found 417.1310.

**IR** (neat) 2988, 2349, 1715, 1613, 1514, 1414, 1356, 1277, 1175, 1028, 963, 859, 793, 673, 560 cm<sup>-1</sup>.

### Ethyl 1-((4-methoxybenzyl)oxy)-4-phenylanthracene-2-carboxylate (A51)

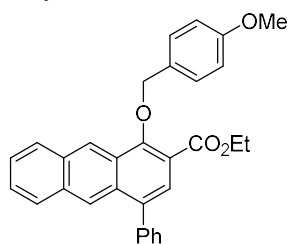

**Result:** 82% yield, yellow solid, Mp: 79-81 °C

**<sup>1</sup>H NMR** (400 MHz, Chloroform-*d*) δ 8.29 (m, 1H), 7.94 (m, 1H), 7.85 (d, *J* = 7.3 Hz, 1H), 7.78 (m, 2H), 7.58 (d, *J* = 8.4 Hz, 2H), 7.54 – 7.39 (m, 6H), 7.18 – 7.09 (m, 1H), 7.00 (d, *J* = 8.4 Hz, 2H), 5.18 (s, 2H), 4.46 (q, *J* = 7.0 Hz, 2H), 3.87 (s, 3H), 1.42 (t, *J* = 7.1 Hz, 3H).

**<sup>13</sup>C NMR** (101 MHz, Chloroform-*d*) δ 166.0 , 159.6 , 155.5 , 144.4 , 136.2 , 134.0 , 132.7 , 131.5 , 130.0 , 129.9 , 129.3 , 129.1 , 129.0 , 128.7 , 128.5 , 128.3 , 128.2 , 127.3 , 127.0 , 125.1 , 121.3 , 120.4 , 113.92 , 77.7 , 61.2 , 55.3 , 14.4 .

**HRMS** (ESI) Calculated for C<sub>31</sub>H<sub>26</sub>O<sub>4</sub> ([M]<sup>+</sup>+Na<sup>+</sup>) = 485.1723, Found 485.1724.

**IR** (neat) 2979, 2835, 1720, 1612, 1513, 1442, 1354, 1172, 1030, 967, 880, 789, 681, 565 cm<sup>-1</sup>.

### Ethyl 7-((4-methoxybenzyl)oxy)-4-phenylbenzo[b]thiophene-6-carboxylate (A52)

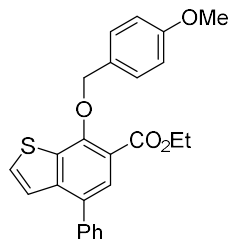

**Result:** 86% yield, white solid, Mp: 103-105 °C

**<sup>1</sup>H NMR** (400 MHz, Chloroform-*d*) δ 7.90 (s, 1H), 7.58 (m, 3H), 7.56 – 7.46 (m, 5H), 7.42 (m, 1H), 6.97 (d, *J* = 8.6 Hz, 2H), 5.24 (s, 2H), 4.45 (q, *J* = 7.1 Hz, 2H), 3.85 (s, 3H), 1.42 (t, *J* = 7.1 Hz, 3H).

**<sup>13</sup>C NMR** (101 MHz, Chloroform-*d*) δ 165.9 , 159.6 , 153.6 , 142.5 , 139.8 , 135.8 , 133.3 , 130.2 , 129.2 , 129.0 , 128.6 , 128.0 , 127.5 , 123.9 , 119.1 , 113.8 , 76.2 , 61.1 , 55.3 , 14.4 .

**HRMS** (ESI) Calculated for C<sub>25</sub>H<sub>22</sub>O<sub>4</sub>S ([M]<sup>+</sup>+Na<sup>+</sup>) = 411.1131, Found 411.1142.

**IR** (neat) 2983, 2835, 2397, 1715, 1612, 1514, 1440, 1372, 1274, 1175, 1037, 955, 861, 798, 669, 559 cm<sup>-1</sup>.

## 3. General Procedure for the Catalytic Asymmetric dearomatization

### 3.1 General procedure for the catalytic asymmetric synthesis

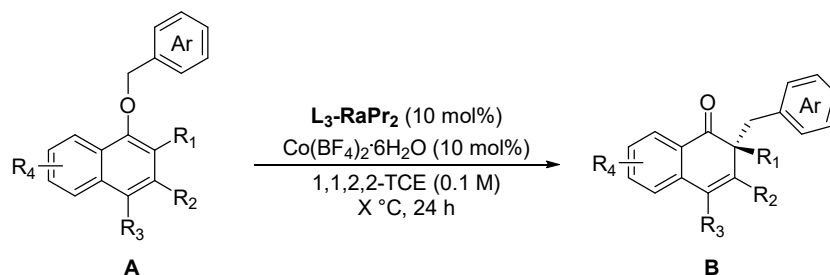

A dry reaction tube was charged with **L<sub>3</sub>-RaPr<sub>2</sub>** (7.0 mg, 10 mol%) and Co(BF<sub>4</sub>)<sub>2</sub>·6H<sub>2</sub>O (3.4 mg, 10 mol%) followed by the addition of 1,1,2,2-TCE (1.0 mL). The mixture was stirred at 35 °C for 60 min followed by addition of the substrate **A** (0.1 mmol). The reaction mixture was stirred at indicated temperature for 24 h. The reaction mixture was subjected to column chromatography on silica gel and eluted with petroleum ether/ethyl acetate (20/1 and 10/1, v/v) to afford the corresponding products **B**.

### 3.2 General procedure for the preparation of the racemic products

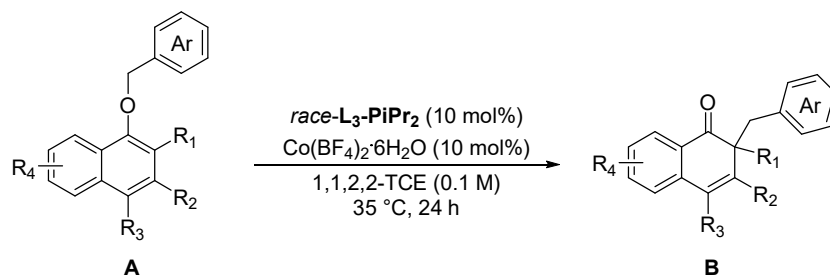

A dry reaction tube was charged with *race*-**L<sub>3</sub>-PiPr<sub>2</sub>** (6.5 mg, 10 mol%), Co(BF<sub>4</sub>)<sub>2</sub>·6H<sub>2</sub>O (3.4 mg, 10 mol%) and substrates **A** (0.1 mmol) followed by the addition of 1,1,2,2-TCE (1.0 mL). The mixture was stirred at 35 °C for 24 h. The reaction mixture was subjected to column chromatography on silica gel and eluted with petroleum ether/ethyl acetate (20/1 and 10/1, v/v) to afford the corresponding racemic products **B**.

## 4. Optimization of Reaction Conditions

**Table S1. Screening of metal salts.**

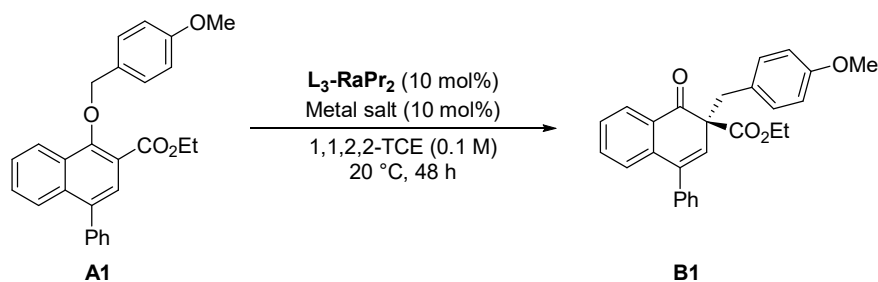

| Entry <sup>[a]</sup> | Metal salt                                           | Yield [%] <sup>[b]</sup> | Ee [%] <sup>[c]</sup> |
|----------------------|------------------------------------------------------|--------------------------|-----------------------|
| 1                    | Cu(OTf) <sub>2</sub>                                 | 41                       | 17                    |
| 2                    | Zn(OTf) <sub>2</sub>                                 | 35                       | 98                    |
| 3                    | Al(OTf) <sub>3</sub>                                 | Decomposed               | --                    |
| 4                    | Ln(OTf) <sub>3</sub>                                 | 17                       | 19                    |
| 5                    | Co(OTf) <sub>2</sub>                                 | 71                       | 96                    |
| 6                    | Mg(OTf) <sub>2</sub>                                 | 69                       | 99                    |
| 7                    | Ni(OTf) <sub>2</sub>                                 | 70                       | 96                    |
| 8                    | Fe(OTf) <sub>2</sub>                                 | N.R.                     | --                    |
| 9                    | Co(BF <sub>4</sub> ) <sub>2</sub> ·6H <sub>2</sub> O | 75                       | 98                    |

[a] Unless otherwise noted, all reactions were carried out with **A1** (0.1 mmol), **L<sub>3</sub>-RaPr<sub>2</sub>**/Metal salt (1:1, 10 mol %) in 1,1,2,2-TCE (0.1 M) at 20 °C for 48 h. [b] Yield of isolated product. [c] Determined by SFC analysis on a chiral stationary phase. 1,1,2,2-TCE = 1,1,2,2-Tetrachloroethane. N.R. = No Reaction.

**Table S2. Screening of chiral *N,N'*-dioxide ligands.**

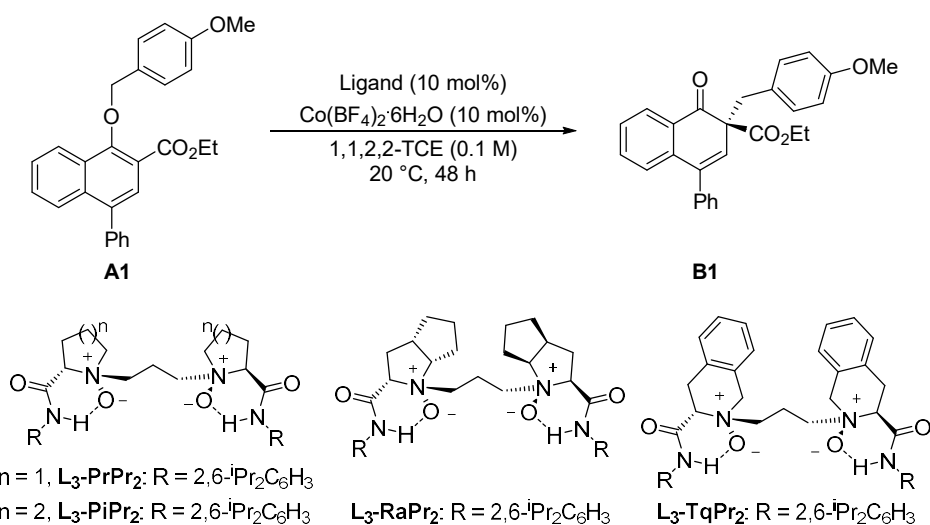

| Entry <sup>[a]</sup> | Ligand | Yield [%] <sup>[b]</sup> | Ee [%] <sup>[c]</sup> |
|----------------------|--------|--------------------------|-----------------------|
|----------------------|--------|--------------------------|-----------------------|

|   |                                       |    |    |
|---|---------------------------------------|----|----|
| 1 | <b>L<sub>3</sub>-PiPr<sub>2</sub></b> | 65 | 97 |
| 2 | <b>L<sub>3</sub>-PrPr<sub>2</sub></b> | 50 | 99 |
| 3 | <b>L<sub>3</sub>-RaPr<sub>2</sub></b> | 75 | 98 |
| 4 | <b>L<sub>3</sub>-TqPr<sub>2</sub></b> | 60 | 98 |

[a] Unless otherwise noted, all reactions were carried out with **A1** (0.1 mmol), **ligand**/Co(BF<sub>4</sub>)<sub>2</sub>·6H<sub>2</sub>O (1:1, 10 mol %) in 1,1,2,2-TCE (0.1 M) at 20 °C for 48 h. [b] Yield of isolated product. [c] Determined by SFC analysis on a chiral stationary phase. 1,1,2,2-TCE = 1,1,2,2-Tetrachloroethane.

**Table S3. Screening of the solvent.**

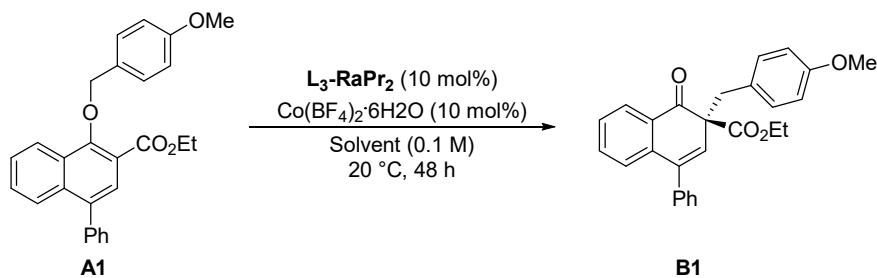

| Entry <sup>[a]</sup> | Metal salt         | Yield [%] <sup>[b]</sup> | Ee [%] <sup>[c]</sup> |
|----------------------|--------------------|--------------------------|-----------------------|
| 1                    | 1,1,2,2-TCE        | 75                       | 98                    |
| 2                    | DCM                | 69                       | 97                    |
| 3                    | DCE                | 64                       | 97                    |
| 4                    | CHCl <sub>3</sub>  | 16                       | 95                    |
| 5                    | THF                | N.R.                     | --                    |
| 6                    | CH <sub>3</sub> CN | 44                       | 67                    |
| 7                    | PhCH <sub>3</sub>  | N.R.                     | --                    |

[a] Unless otherwise noted, all reactions were carried out with **A1** (0.1 mmol), **L<sub>3</sub>-RaPr<sub>2</sub>**/Co(BF<sub>4</sub>)<sub>2</sub>·6H<sub>2</sub>O (1:1, 10 mol %) in solvent (0.1 M) at 20 °C for 48 h. [b] Yield of isolated product. [c] Determined by SFC analysis on a chiral stationary phase. 1,1,2,2-TCE = 1,1,2,2-Tetrachloroethane, DCM = Dichloromethane, DCE = 1,2-Dichloroethane, THF = Tetrahydrofuran, PhCH<sub>3</sub> = Toluene. N.R. = No Reaction.

**Table S4. Screening of the additive.**

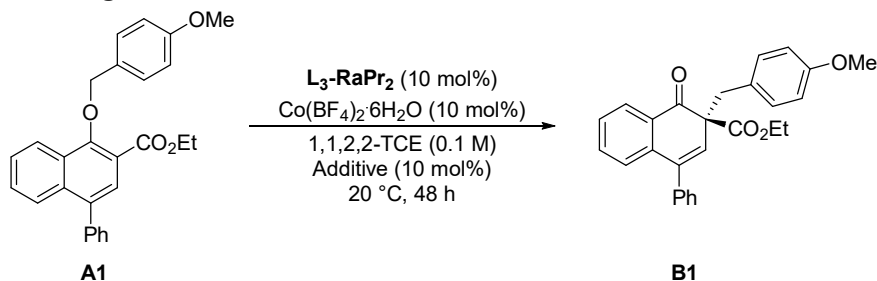

| Entry <sup>[a]</sup> | Additive | Yield [%] <sup>[b]</sup> | Ee [%] <sup>[c]</sup> |
|----------------------|----------|--------------------------|-----------------------|
| 1                    | --       | 75                       | 98                    |

|   |                                          |      |    |
|---|------------------------------------------|------|----|
| 2 | H <sub>2</sub> O (1.0 equiv.)            | 56   | 98 |
| 3 | 4Å MS (20 mg)                            | 70   | 94 |
| 4 | NaBAR <sup>F</sup> <sub>4</sub>          | 37   | 89 |
| 5 | K <sub>2</sub> CO <sub>3</sub> (20 mol%) | N.R. | -- |
| 6 | PhCO <sub>2</sub> H                      | 72   | 98 |
| 7 | DMAP                                     | 62   | 98 |

[a] Unless otherwise noted, all reactions were carried out with **A1** (0.1 mmol), **L<sub>3</sub>-RaPr<sub>2</sub>**/Co(BF<sub>4</sub>)<sub>2</sub>·6H<sub>2</sub>O (1:1, 10 mol %) in 1,1,2,2-TCE (0.1 M) at 20 °C for 48 h. [b] Yield of isolated product. [c] Determined by SFC analysis on a chiral stationary phase. 1,1,2,2-TCE = 1,1,2,2-Tetrachloroethane. N.R. = No Reaction.

**Table S5. Screening of temperature.**

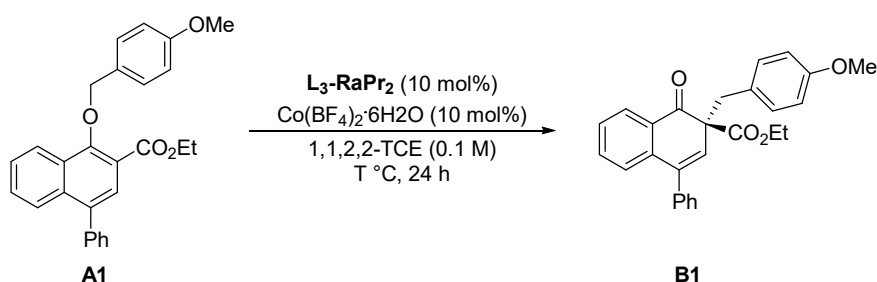

| Entry <sup>[a]</sup> | T / °C | Yield [%] <sup>[b]</sup> | Ee [%] <sup>[c]</sup> |
|----------------------|--------|--------------------------|-----------------------|
| 1 <sup>[d]</sup>     | 20     | 75                       | 98                    |
| 2                    | 30     | 80                       | 98                    |
| 3                    | 35     | 73                       | 95                    |
| 4                    | 40     | 68                       | 94                    |
| 5 <sup>[e]</sup>     | 30     | 69                       | 98                    |
| 6 <sup>[f]</sup>     | 30     | 7                        | 0                     |

[a] Unless otherwise noted, all reactions were carried out with **A1** (0.1 mmol), **L<sub>3</sub>-RaPr<sub>2</sub>**/Co(BF<sub>4</sub>)<sub>2</sub>·6H<sub>2</sub>O (1:1, 10 mol %) in 1,1,2,2-TCE (0.1 M) at 20 °C for 48 h. [b] Yield of isolated product. [c] Determined by SFC analysis on a chiral stationary phase. [d] Reaction was performed at 20 °C for 48 h. [e] **L<sub>3</sub>-RaPr<sub>2</sub>**/ Co(BF<sub>4</sub>)<sub>2</sub>·6H<sub>2</sub>O (1:1, 5 mol %). [f] without **L<sub>3</sub>-RaPr<sub>2</sub>**. 1,1,2,2-TCE = 1,1,2,2-Tetrachloroethane.

**Table S6. Investigation of reaction conditions for B10.**

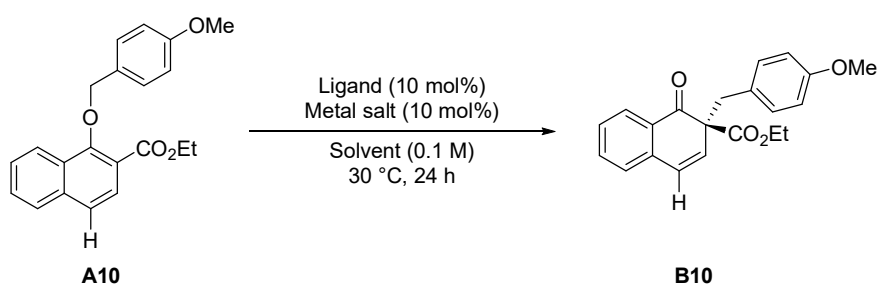

| Entry <sup>[a]</sup> | Ligand | Metal salt | Solvent | Yield [%] <sup>[b]</sup> | Ee [%] <sup>[c]</sup> |
|----------------------|--------|------------|---------|--------------------------|-----------------------|
|----------------------|--------|------------|---------|--------------------------|-----------------------|



|                  |                                       |                                                      |             |    |    |
|------------------|---------------------------------------|------------------------------------------------------|-------------|----|----|
| 1                | <b>L<sub>3</sub>-RaPr<sub>2</sub></b> | Co(BF <sub>4</sub> ) <sub>2</sub> ·6H <sub>2</sub> O | 1,1,2,2-TCE | 66 | 98 |
| 2                | <b>L<sub>3</sub>-RaPr<sub>2</sub></b> | Mg(OTf) <sub>2</sub>                                 | 1,1,2,2-TCE | 39 | 94 |
| 3                | <b>L<sub>3</sub>-RaPr<sub>2</sub></b> | Zn(OTf) <sub>2</sub>                                 | 1,1,2,2-TCE | 57 | 95 |
| 4                | <b>L<sub>3</sub>-RaPr<sub>2</sub></b> | Ni(OTf) <sub>2</sub>                                 | 1,1,2,2-TCE | 25 | 95 |
| 5                | <b>L<sub>3</sub>-PrPr<sub>2</sub></b> | Co(BF <sub>4</sub> ) <sub>2</sub> ·6H <sub>2</sub> O | 1,1,2,2-TCE | 52 | 91 |
| 6                | <b>L<sub>3</sub>-PiPr<sub>2</sub></b> | Co(BF <sub>4</sub> ) <sub>2</sub> ·6H <sub>2</sub> O | 1,1,2,2-TCE | 45 | 97 |
| 7                | <b>L<sub>3</sub>-RaPr<sub>2</sub></b> | Co(BF <sub>4</sub> ) <sub>2</sub> ·6H <sub>2</sub> O | DCM         | 53 | 98 |
| 8 <sup>[d]</sup> | <b>L<sub>3</sub>-RaPr<sub>2</sub></b> | Co(BF <sub>4</sub> ) <sub>2</sub> ·6H <sub>2</sub> O | 1,1,2,2-TCE | 63 | 98 |
| 9 <sup>[e]</sup> | <b>L<sub>3</sub>-RaPr<sub>2</sub></b> | Co(BF <sub>4</sub> ) <sub>2</sub> ·6H <sub>2</sub> O | 1,1,2,2-TCE | 43 | 96 |

[a] Unless otherwise noted, all reactions were carried out with **A10** (0.1 mmol), Ligand/Metal salt (1:1, 10 mol %) in solvent (0.1 M) at 30 °C for 24 h. [b] Yield of isolated product. [c] Determined by SFC analysis on a chiral stationary phase. [d] Reaction was performed at 20 °C for 48 h. [e] Reaction was performed at 40 °C for 24 h. 1,1,2,2-TCE = 1,1,2,2-Tetrachloroethane, DCM = Dichloromethane.

## 5. Gram-Scale Synthesis of the Product **B1**

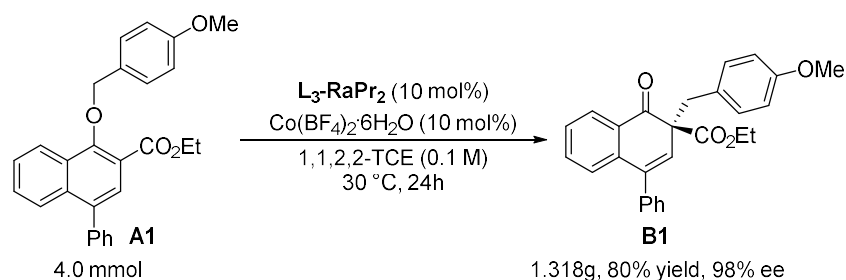

An oven dried round-bottom flask (100 mL) was charged with **L<sub>3</sub>-RaPr<sub>2</sub>** (280.4 mg, 10 mol%) and Co(BF<sub>4</sub>)<sub>2</sub>·6H<sub>2</sub>O (136.0 mg, 10 mol%) followed by the addition of 1,1,2,2-TCE (40.0 mL). The mixture was stirred at 35 °C for 60 min followed by addition of the substrate **A1** (1.648 g, 4.0 mmol). The reaction mixture was stirred at 30 °C for 24 h. The reaction mixture was subjected to column chromatography on silica gel and eluted with petroleum ether/ethyl acetate (20/1 and 10/1, v/v) to afford the corresponding product **B1** (1.318 g, 80% yield, 98% ee).

## 6. Synthetic Transformation

### 6.1 Experimental procedure for the synthesis of **C1**

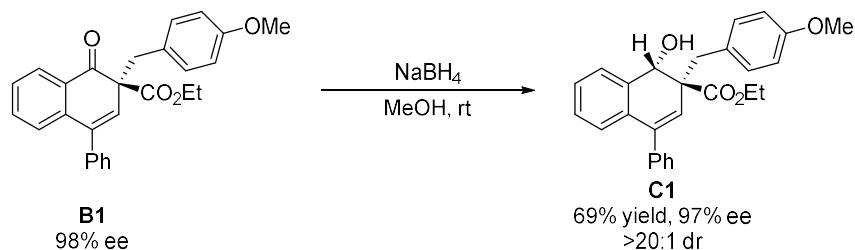

To a solution of **B1** (41.2 mg, 0.1 mmol, 98% ee) in anhydrous MeOH (2 mL) was added NaBH<sub>4</sub> (0.12 mmol, 1.2 equiv), and the reaction was then stirred at room temperature. After the reaction was complete (monitored by TLC), the reaction was quenched with H<sub>2</sub>O, and extracted with dichloromethane. The organic layers were combined and dried over Na<sub>2</sub>SO<sub>4</sub>, filtered and concentrated by rotary evaporation. Then the residue was purified by silica gel column chromatography (petroleum

ether /ethyl acetate = 8/1) to afford product **C1** (28.5 mg, 69% yield, 97% ee, >20:1 dr). The absolute configuration of **C1** was determined by NOESY NMR spectra.

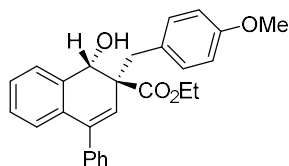

**Result:** colorless oil, 69% yield, 97% ee, >19:1 dr;  $[\alpha]^{24.8} = -191.3$  ( $c = 0.49$  in  $\text{CH}_2\text{Cl}_2$ ,  $\lambda = 589$  nm); SFC (Daicel chiralcel OZ-3,  $\text{CO}_2/\text{MeOH} = 90/10$ , flow rate = 1.5 mL/min,  $\lambda = 254$  nm),  $t_1 = 6.97$  min,  $t_2 = 11.72$  min.

**$^1\text{H}$  NMR** (600 MHz, Chloroform- $d$ )  $\delta$  7.75 (d,  $J = 7.6$  Hz, 1H), 7.42 – 7.34 (m, 6H), 7.21 (t,  $J = 7.5$  Hz, 1H), 7.04 (m, 3H), 6.79 (d,  $J = 8.3$  Hz, 2H), 6.01 (s, 1H), 5.27 (s, 1H), 4.13 (q,  $J = 7.1$  Hz, 2H), 4.04 (s, 1H), 3.79 (s, 3H), 3.21 (d,  $J = 13.6$  Hz, 1H), 2.83 (d,  $J = 13.6$  Hz, 1H), 1.15 (t,  $J = 7.1$  Hz, 3H).

**$^{13}\text{C}$  NMR** (151 MHz, Chloroform- $d$ )  $\delta$  175.9, 158.3, 139.6, 139.1, 136.3, 132.3, 131.2, 129.0, 128.7, 128.3, 127.7, 127.3, 127.2, 125.7, 125.4, 113.2, 71.9, 61.5, 55.2, 53.4, 35.4, 14.0.

**HRMS** (ESI) Calculated for  $\text{C}_{27}\text{H}_{26}\text{O}_4$  ( $[\text{M}] + \text{Na}^+$ ) = 437.1723, Found 437.1723.

**IR** (neat) 3501, 2931, 1702, 1611, 1511, 1446, 1247, 1111, 1035, 833, 771, 703, 553  $\text{cm}^{-1}$ .

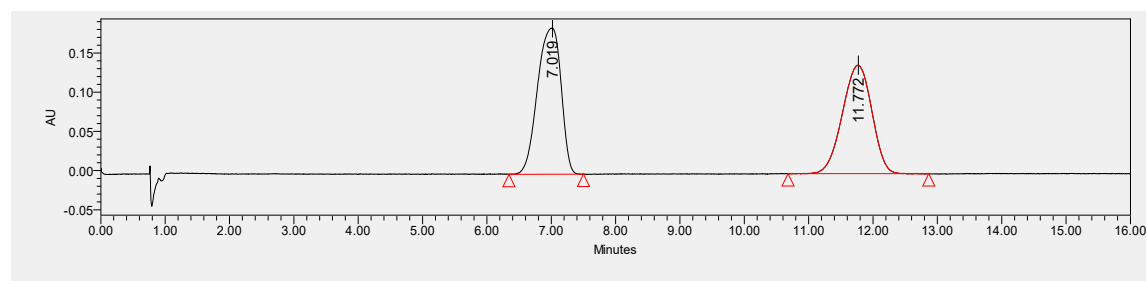

|   | Retention Time | Area    | % Area |
|---|----------------|---------|--------|
| 1 | 7.019          | 4741634 | 51.91  |
| 2 | 11.772         | 4392483 | 48.09  |

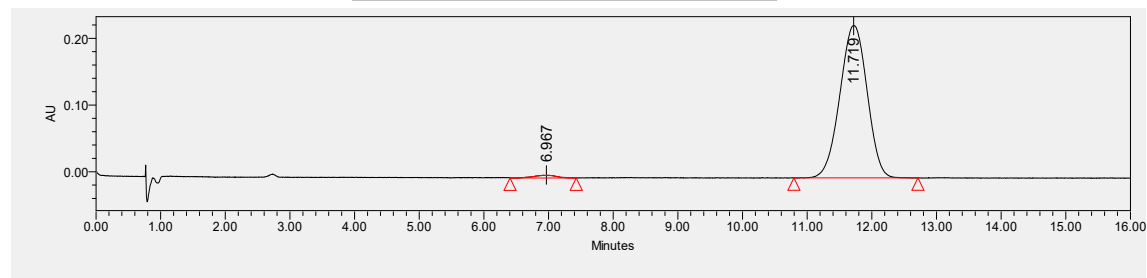

|   | Retention Time | Area    | % Area |
|---|----------------|---------|--------|
| 1 | 6.967          | 102665  | 1.52   |
| 2 | 11.719         | 6673271 | 98.48  |

## 6.2 Experimental procedure for the synthesis of **C2**

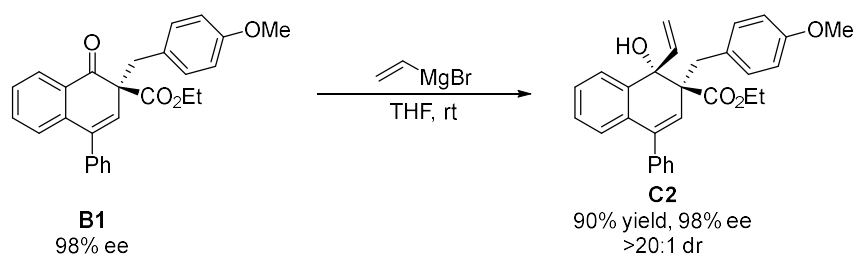

To a solution of **B1** (41.2 mg, 0.1 mmol, 98% ee) in THF (2 mL) was added vinyl magnesium bromide (0.15 mmol, 1.5 equiv) slowly, and the reaction was then stirred at room temperature. After the reaction was complete (monitored by TLC), the reaction was quenched with saturated aqueous NaHCO<sub>3</sub>, and extracted with dichloromethane. The organic layers were combined and dried over Na<sub>2</sub>SO<sub>4</sub>, filtered and concentrated by rotary evaporation. Then the residue was purified by silica gel column chromatography (petroleum ether /ethyl acetate = 8/1) to afford product **C2** (3965 mg, 90% yield, 98% ee, >20:1 dr). The absolute configuration of **C2** was determined by NOESY NMR spectra.

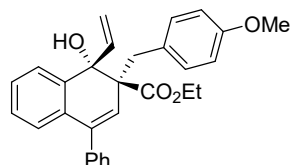

**Result:** colorless oil, 90% yield, 98% ee, >19:1 dr;  $[\alpha]^{25.4} = -338.5$  ( $c = 0.79$  in CH<sub>2</sub>Cl<sub>2</sub>,  $\lambda = 589$  nm); SFC (Daicel chiralcel OZ-3, CO<sub>2</sub>/MeOH = 95/5, flow rate = 1.5 mL/min,  $\lambda = 254$  nm),  $t_1 = 7.09$  min,  $t_2 = 8.63$  min.

**<sup>1</sup>H NMR** (600 MHz, Chloroform-*d*)  $\delta$  7.75 (d,  $J = 7.6$  Hz, 1H), 7.43 – 7.36 (m, 6H), 7.23 (t,  $J = 7.7$  Hz, 1H), 7.11 (d,  $J = 7.8$  Hz, 1H), 7.00 (d,  $J = 8.6$  Hz, 2H), 6.82 (d,  $J = 8.6$  Hz, 2H), 6.41 (dd,  $J = 17.0, 10.5$  Hz, 1H), 6.04 (s, 1H), 5.46 (d,  $J = 17.0$  Hz, 1H), 5.02 (d,  $J = 10.5$  Hz, 1H), 4.43 (s, 1H), 4.15 (q,  $J = 7.1$  Hz, 2H), 3.81 (s, 3H), 3.45 (d,  $J = 13.3$  Hz, 1H), 2.85 (d,  $J = 13.4$  Hz, 1H), 1.17 (t,  $J = 7.2$  Hz, 3H).

**<sup>13</sup>C NMR** (151 MHz, Chloroform-*d*)  $\delta$  175.2, 158.4, 139.7, 138.3, 138.2, 131.8, 131.0, 129.1, 128.9, 128.5, 128.4, 128.0, 127.7, 127.2, 126.0, 124.7, 113.5, 113.3, 78.0, 61.5, 57.0, 55.2, 37.7, 14.1.

**HRMS** (ESI) Calculated for C<sub>29</sub>H<sub>28</sub>O<sub>4</sub> ([M]<sup>+</sup>+Na<sup>+</sup>) = 463.1880, Found 463.1881.

**IR** (neat) 2984, 2361, 1699, 1611, 1511, 1445, 1249, 1179, 1038, 922, 838, 761, 702 cm<sup>-1</sup>.

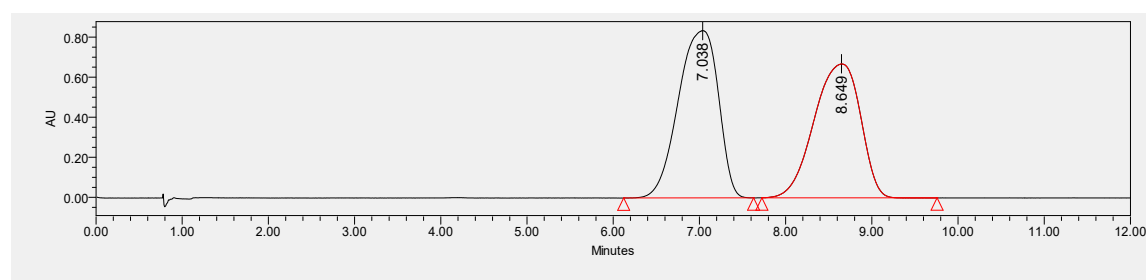

|   | Retention Time | Area     | % Area |
|---|----------------|----------|--------|
| 1 | 7.038          | 26998563 | 51.93  |
| 2 | 8.649          | 24988696 | 48.07  |

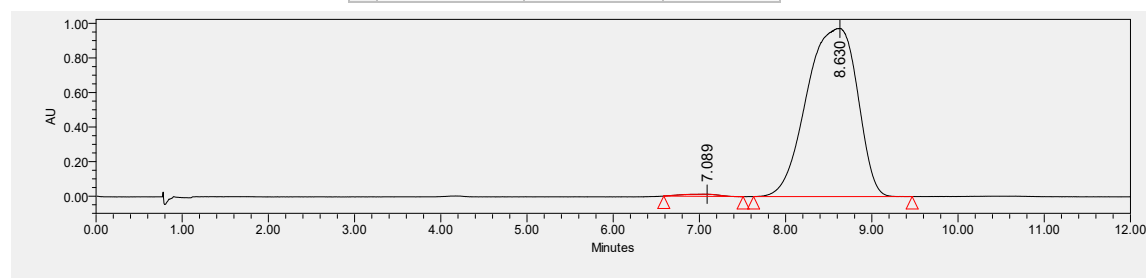

|   | Retention Time | Area     | % Area |
|---|----------------|----------|--------|
| 1 | 7.089          | 366663   | 0.91   |
| 2 | 8.630          | 39774999 | 99.09  |

### 6.3 Experimental procedure for the synthesis of C3

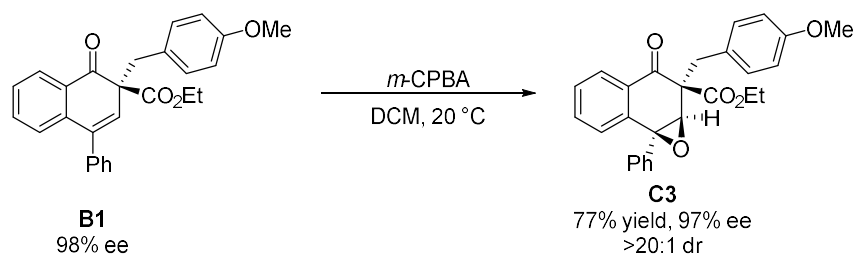

To a solution of **B1** (41.2 mg, 0.1 mmol, 98% ee) in DCM (1 mL) was added *m*-CPBA (0.20 mmol, 2.0 equiv) slowly, and the reaction was then stirred at 20 °C. After the reaction was complete (monitored by TLC), the reaction was quenched with aqueous K<sub>2</sub>CO<sub>3</sub>, and extracted with dichloromethane. The organic layers were combined and dried over Na<sub>2</sub>SO<sub>4</sub>, filtered and concentrated by rotary evaporation. Then the residue was purified by silica gel column chromatography (petroleum ether /ethyl acetate = 8/1) to afford product **C3** (32.9 mg, 77% yield, 97% ee, >20:1 dr). The absolute configuration of **C3** was determined by NOESY NMR spectra.

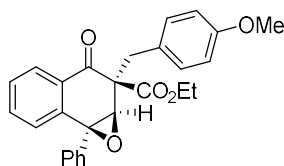

**Result:** colorless oil, 77% yield, 97% ee, >19:1 dr;  $[\alpha]_{25.6}^{25.6} = -48.8$  ( $c = 0.66$  in CH<sub>2</sub>Cl<sub>2</sub>,  $\lambda = 589$  nm); SFC (Daicel chiralcel OZ-3, CO<sub>2</sub>/MeOH = 90/10, flow rate = 1.5 mL/min,  $\lambda = 254$  nm),  $t_1 = 5.45$  min,  $t_2 = 8.33$  min.

<sup>1</sup>H NMR (600 MHz, Chloroform-*d*)  $\delta$  8.02 – 7.91 (m, 1H), 7.54 (s, 2H), 7.45 – 7.38 (m, 5H), 7.22 (d,  $J = 8.6$  Hz, 2H), 7.08 – 7.05 (m, 1H), 6.81 (d,  $J = 8.6$  Hz, 2H), 4.11 (m, 2H), 3.98 (d,  $J = 14.1$  Hz, 1H), 3.86 (s, 1H), 3.76 (s, 3H), 3.23 (d,  $J = 14.1$  Hz, 1H), 1.14 (t,  $J = 7.2$  Hz, 3H).

<sup>13</sup>C NMR (151 MHz, Chloroform-*d*)  $\delta$  190.6 , 167.7 , 158.6 , 141.0 , 136.3 , 133.2 , 131.5 , 131.3 , 129.9 , 129.0 , 128.6 , 128.4 , 127.9 , 127.6 , 113.9 , 62.1 , 62.1 , 61.4 , 60.2 , 55.1 , 36.9 , 14.0.

HRMS (ESI) Calculated for C<sub>27</sub>H<sub>24</sub>O<sub>5</sub> ([M]<sup>+</sup>+Na<sup>+</sup>) = 451.1516, Found 451.1520.

IR (neat) 2983, 1736, 1609, 1512, 1460, 1250, 1109, 1033, 917, 855, 762, 571, 526 cm<sup>-1</sup>.

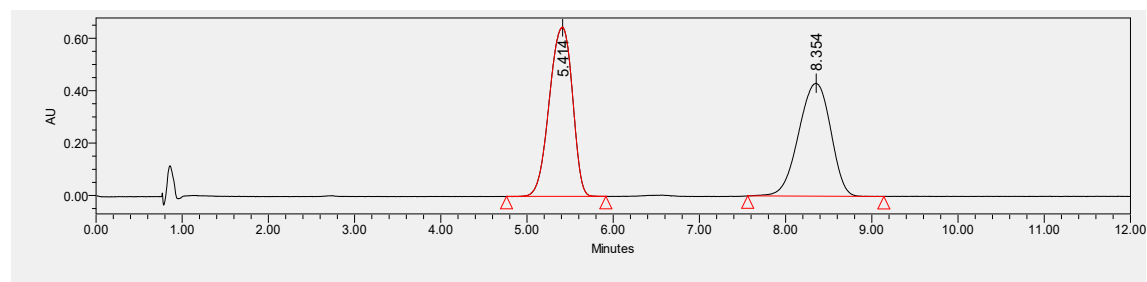

|   | Retention Time | Area     | % Area |
|---|----------------|----------|--------|
| 1 | 5.414          | 11998618 | 51.88  |
| 2 | 8.354          | 11130230 | 48.12  |

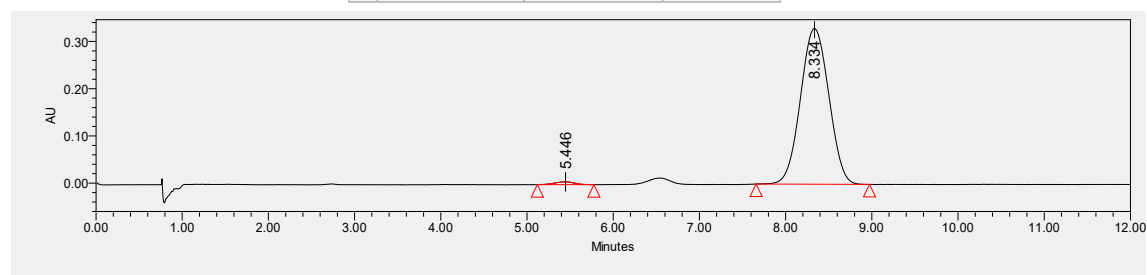

|   | Retention Time | Area    | % Area |
|---|----------------|---------|--------|
| 1 | 5.446          | 93820   | 1.23   |
| 2 | 8.334          | 7541601 | 98.77  |

## 7. Kinetic Studies

Procedure of react IR experiment for kinetic studies of **A1** and **L<sub>3</sub>-RaPr<sub>2</sub>/Co(BF<sub>4</sub>)<sub>2</sub>·6H<sub>2</sub>O** catalyst. Kinetic analysis was performed using in situ attenuated total reflectance Fouriertransform infrared (ATR FTIR) spectroscopy to track the consumption of the reactant **A1** under synthetically relevant conditions. A Mettler Toledo SW License iC IR 701L instrument was treated as main experiment equipment. All the kinetic experiments on each plot were performed using a single batch of reagents.

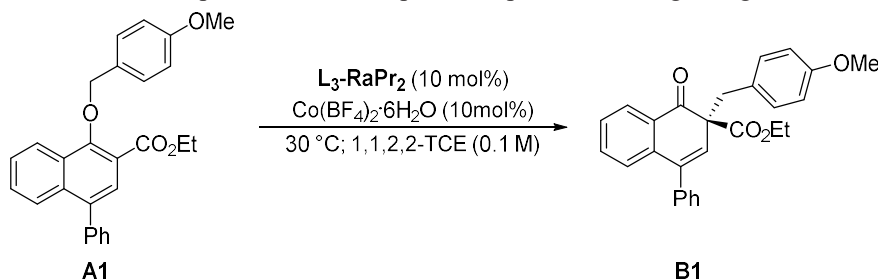

First, the infrared absorption spectra of each reactant **A1** and product **B1** in 1,1,2,2-TCE were collected. The following figure shows the absorption of each participant minus the absorption of solvent. Peak at  $1359 \text{ cm}^{-1}$  was identified as the characteristic absorption of substrate **A1**. Then **L<sub>3</sub>-RaPr<sub>2</sub>** and **Co(BF<sub>4</sub>)<sub>2</sub>·6H<sub>2</sub>O** were added to the test tube and dissolved in 1,1,2,2-TCE (3.0 mL), the mixture was stirred at  $35 \text{ } ^\circ\text{C}$  for 60 min. Finally, **A1** (dissolved in 1,1,2,2-TCE (2.0 mL)) was added to the test tube. The reaction mixture was allowed to stir at  $30 \text{ } ^\circ\text{C}$ . Reaction progression was monitored by the decreasing absorbance of **A1** at  $1359 \text{ cm}^{-1}$ .

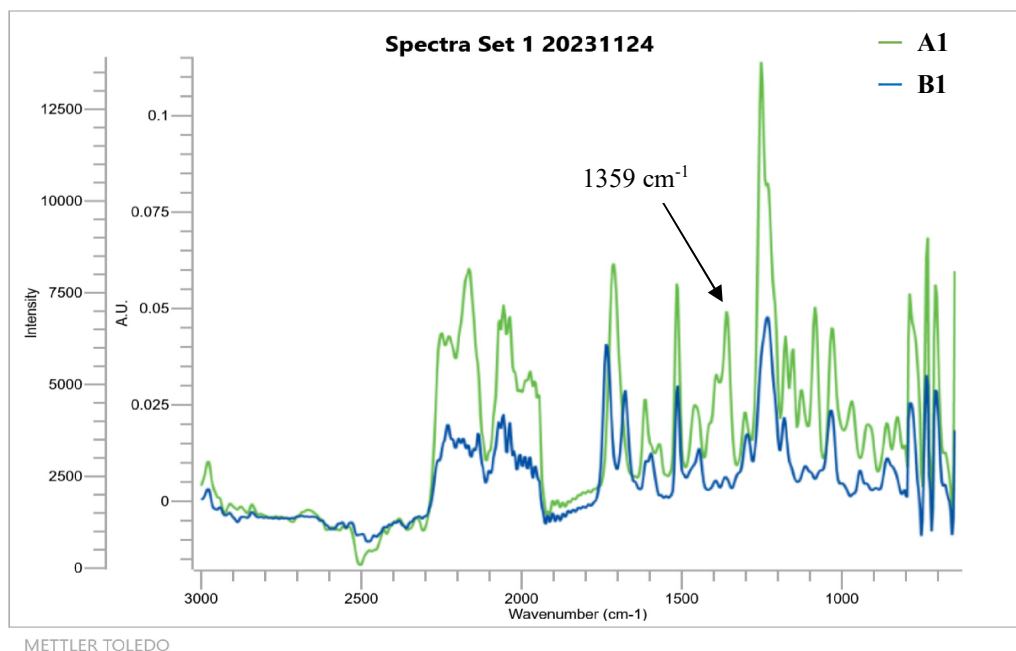

**Figure S1.** Absorption spectra of **A1** and **B1** in 1,1,2,2-TCE

### 7.1 Dependence of the reaction rate on concentration of $L_3\text{-RaPr}_2/\text{Co}(\text{BF}_4)_2 \cdot 6\text{H}_2\text{O}$ catalyst.

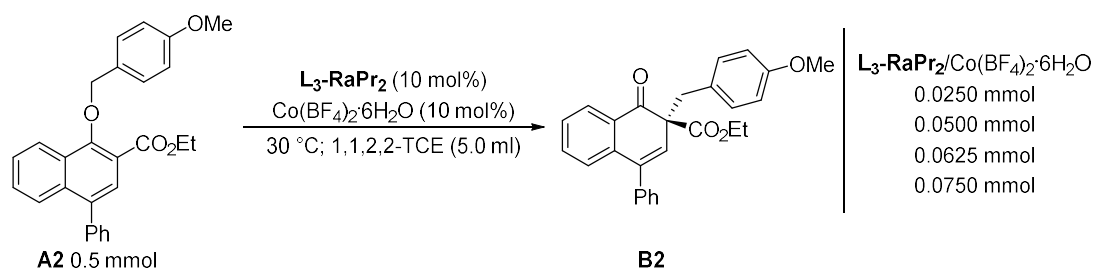

Kinetic profiles of different initial concentration of  $L_3\text{-RaPr}_2/\text{Co}(\text{BF}_4)_2 \cdot 6\text{H}_2\text{O}$  (from 0.005 M to 0.015 M), The plot of  $k_{\text{obs}}$  vs  $L_3\text{-RaPr}_2/\text{Co}(\text{BF}_4)_2 \cdot 6\text{H}_2\text{O}$  displayed a liner relationship, which indicates a first-order kinetic dependence in  $L_3\text{-RaPr}_2/\text{Co}(\text{BF}_4)_2 \cdot 6\text{H}_2\text{O}$ .

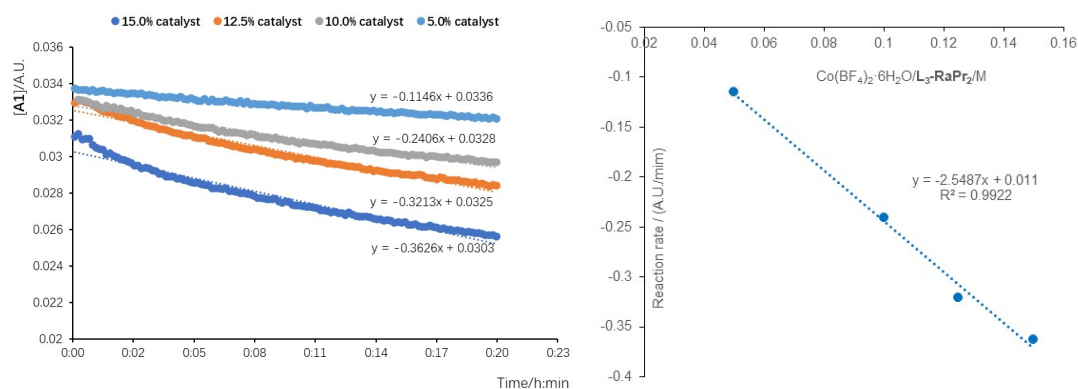

Figure S2. Dependence of the reaction rate on concentration of  $L_3\text{-RaPr}_2/\text{Co}(\text{BF}_4)_2 \cdot 6\text{H}_2\text{O}$  catalyst

### 7.2 Dependence of the reaction rate on concentration of A1.

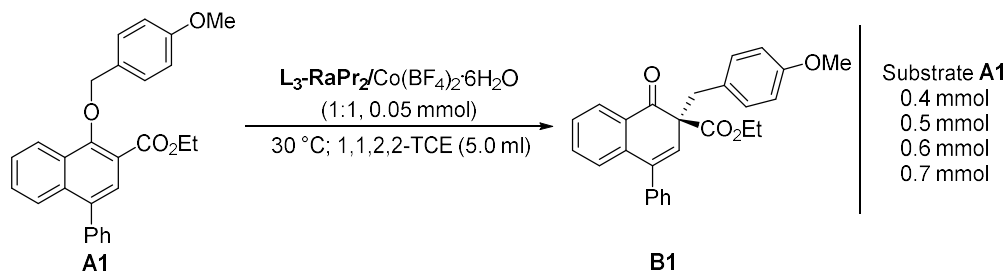

Kinetic profiles of different initial concentration of **A1** (from 0.08 M to 0.14 M), The plot of  $k_{\text{obs}}$  vs **A1** displayed a liner relationship, which indicates a first-order kinetic dependence in **A1**.

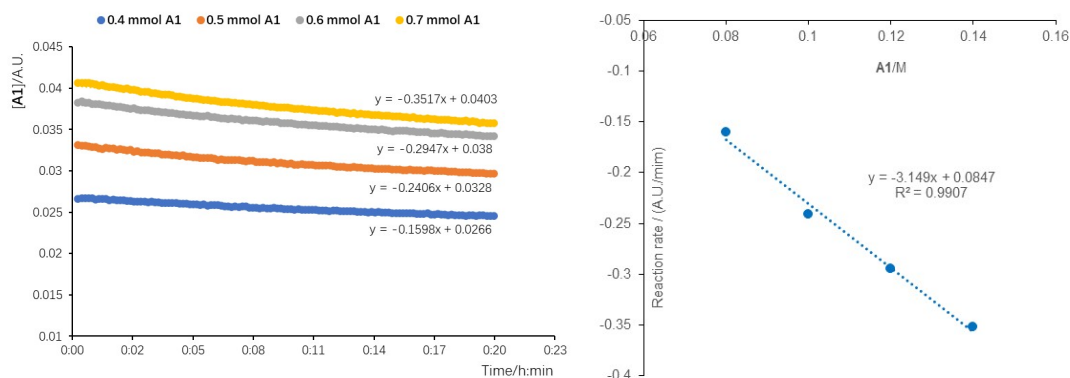

Figure S3. Dependence of the reaction rate on concentration of substrate **A1**

## 8. Unsuccessful Substrates

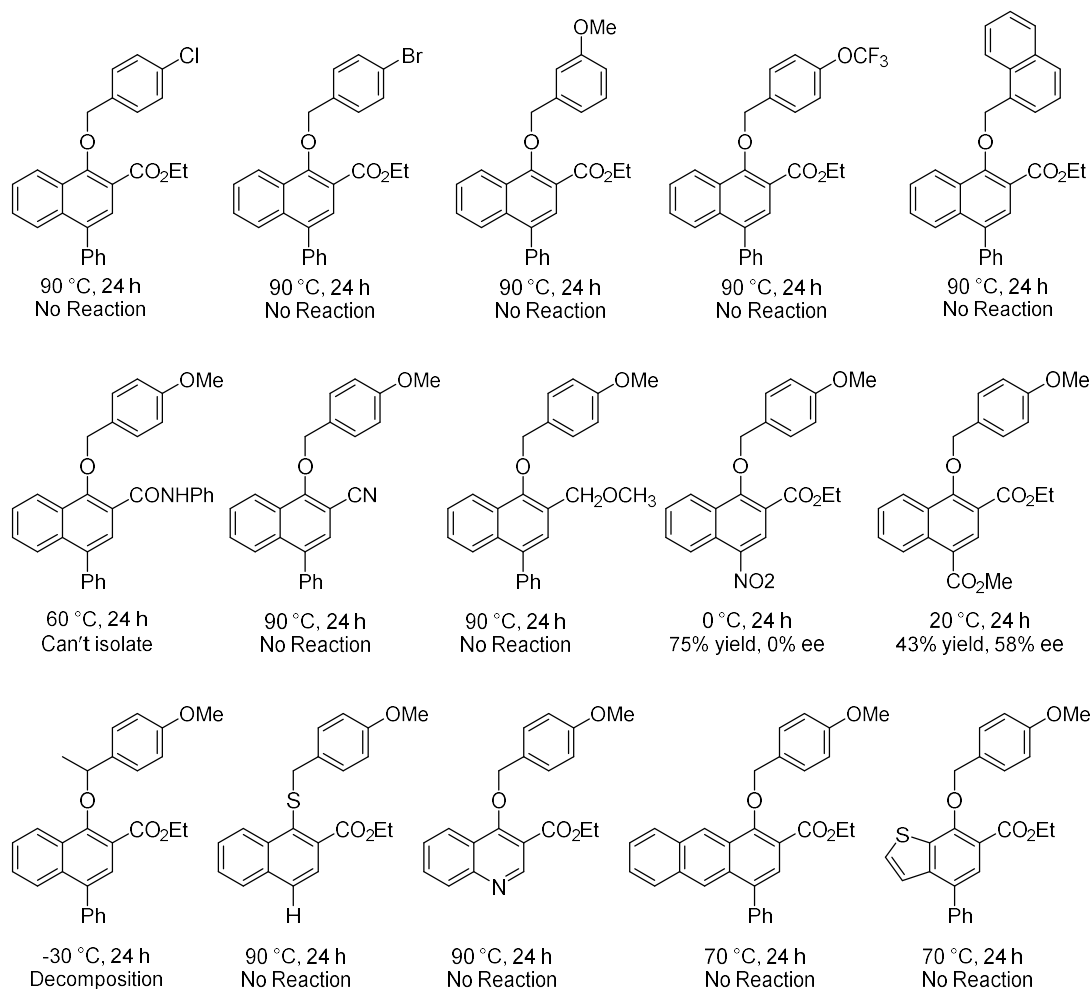

## 9. X-ray Crystal Structures of Product **B10** and $\text{Co}(\text{BF}_4)_2 \cdot 6\text{H}_2\text{O} / \text{L}_3\text{-RaPr}_2$ Complex

The structure of product **B10** was determined by X-ray chromatography analysis. A single crystal of **B10** was obtained by recrystallization in dichloromethane and petroleum ether at 0 °C. The crystal data and further details are listed in **Table S7**. CCDC 2283651 contains the supplementary crystallographic data for this paper. These data are provided free of charge by The Cambridge Crystallographic Data Centre.

The colourless crystal in block-shape, with approximate dimensions of  $0.224 \times 0.336 \times 0.495 \text{ mm}^3$ , was selected and mounted for the single-crystal X-ray diffraction. The data set was collected by Bruker D8 Venture Photon II diffractometer at 173(2)K equipped with micro-focus Cu radiation source ( $K_\alpha = 1.54178\text{\AA}$ ). Applied with face-indexed numerical absorption correction, the structure solution was solved and refinement was processed by SHELXTL (version 6.14) and OLEX 2.3 program package<sup>a, b, c</sup>. The structure was analyzed by ADDSYM routine implemented in PLATON suite and no higher symmetry was suggested<sup>c</sup>.

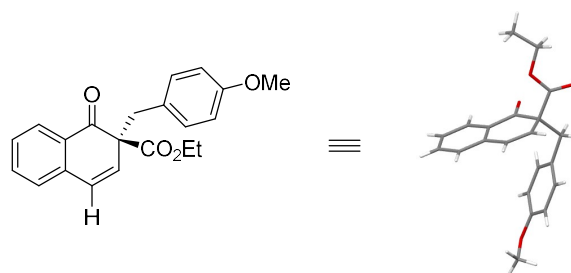

**Table S7.** Crystallographic Data for  $C_{21}H_{20}O_4$  (**B10**).

|                                                   |                   |
|---------------------------------------------------|-------------------|
| Formula                                           | $C_{21}H_{20}O_4$ |
| Formula mass (amu)                                | 446.52            |
| Space group                                       | P 21 21 21        |
| $a$ (Å)                                           | 8.5423 (2)        |
| $b$ (Å)                                           | 12.3659 (2)       |
| $c$ (Å)                                           | 16.7686 (3)       |
| $\alpha$ (deg)                                    | 90                |
| $\beta$ (deg)                                     | 90                |
| $\gamma$ (deg)                                    | 90                |
| $V$ (Å <sup>3</sup> )                             | 1771.32 (6)       |
| $Z$                                               | 4                 |
| $\lambda$ (Å)                                     | 1.54178           |
| $T$ (K)                                           | 173 K             |
| $\rho_{\text{calcd}}$ (g cm <sup>-3</sup> )       | 1.261             |
| $\mu$ (mm <sup>-1</sup> )                         | 0.704             |
| Transmission factors                              | 0.790, 0.928      |
| $2\theta_{\text{max}}$ (deg)                      | 68.281            |
| No. of unique data, including $F_o^2 < 0$         | 3236              |
| No. of unique data, with $F_o^2 > 2\sigma(F_o^2)$ | 3169              |
| No. of variables                                  | 229               |
| $R(F)$ for $F_o^2 > 2\sigma(F_o^2)$ <sup>a</sup>  | 0.0267            |
| $R_w(F_o^2)$ <sup>b</sup>                         | 0.0705            |
| Goodness of fit                                   | 1.030             |

<sup>a</sup>  $R(F) = \sum ||F_o| - |F_c|| / \sum |F_o|$ .

<sup>b</sup>  $R_w(F_o^2) = [\sum [w(F_o^2 - F_c^2)^2] / \sum wF_o^4]^{1/2}$ ;  $w^{-1} = [\sigma^2(F_o^2) + (Ap)^2 + Bp]$ , where  $p = [\max(F_o^2, 0) + 2F_c^2] / 3$ .

The structure of  $Co(BF_4)_2 \cdot 6H_2O / L_3\text{-RaPr}_2$  was obtained from its solution in tetrahydrofuran and petroleum ether. The crystal data and further details are listed in **Table S8**. CCDC 2334140 contains the supplementary crystallographic data for this paper. These data are provided free of charge by The Cambridge Crystallographic Data Centre.

The pink crystal in block-shape, with approximate dimensions of  $0.406 \times 0.758 \times 0.792$  mm<sup>3</sup>, was selected and mounted for the single-crystal X-ray diffraction. The data set was collected by Bruker D8 Venture Photon II diffractometer at 173(2)K equipped with micro-focus Mo radiation source ( $K\alpha = 0.71073$  Å). Applied with face-indexed numerical absorption correction, the structure solution was solved and refinement was processed by SHELXTL (version 6.14) and OLEX 2.3 program package<sup>a, b, c, d</sup>. The value observed herein is indicative of racemic twinning and was accommodated during the refinement (using the SHELXL TWIN instruction). In this case, the relatively large standard uncertainty indicates that the structural data alone should not be used to confirm absolute stereochemistry, but should be used in conjunction with the established stereochemistry of the precursor compound. The structure was analyzed by ADDSYM routine implemented in PLATON suite and no higher symmetry was suggested<sup>e</sup>.



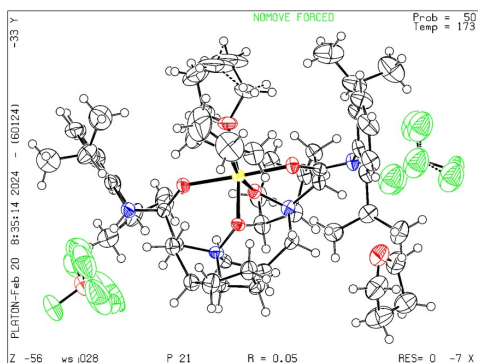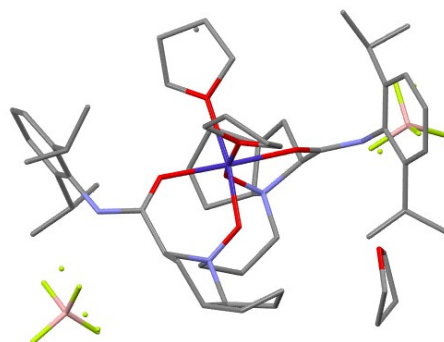

**Table S8.** Crystallographic Data for  $C_{55}H_{88}B_2CoF_8N_4O_7$ .

|                                                   |                              |
|---------------------------------------------------|------------------------------|
| Formula                                           | $C_{55}H_{88}B_2CoF_8N_4O_7$ |
| Formula mass (amu)                                | 1149.84                      |
| Space group                                       | P 21                         |
| $a$ (Å)                                           | 12.6042 (2)                  |
| $b$ (Å)                                           | 16.7477 (2)                  |
| $c$ (Å)                                           | 13.9724 (3)                  |
| $\alpha$ (deg)                                    | 90                           |
| $\beta$ (deg)                                     | 90.008 (1)                   |
| $\gamma$ (deg)                                    | 90                           |
| $V$ (Å <sup>3</sup> )                             | 2949.45 (13)                 |
| $Z$                                               | 2                            |
| $\lambda$ (Å)                                     | 0.71073                      |
| $T$ (K)                                           | 173 K                        |
| $\rho_{\text{calcd}}$ (g cm <sup>-3</sup> )       | 1.295                        |
| $\mu$ (mm <sup>-1</sup> )                         | 0.368                        |
| Transmission factors                              | 0.662, 0.745                 |
| $2\theta_{\text{max}}$ (deg)                      | 25.376                       |
| No. of unique data, including $F_o^2 < 0$         | 10767                        |
| No. of unique data, with $F_o^2 > 2\sigma(F_o^2)$ | 9937                         |
| No. of variables                                  | 741                          |
| $R(F)$ for $F_o^2 > 2\sigma(F_o^2)$ <sup>a</sup>  | 0.0453                       |
| $R_w(F_o^2)$ <sup>b</sup>                         | 0.1184                       |
| Goodness of fit                                   | 1.035                        |

<sup>a</sup>  $R(F) = \sum ||F_o| - |F_c|| / \sum |F_o|$ .

<sup>b</sup>  $R_w(F_o^2) = [\sum [w(F_o^2 - F_c^2)^2] / \sum wF_o^4]^{1/2}$ ;  $w^{-1} = [\sigma^2(F_o^2) + (Ap)^2 + Bp]$ , where  $p = [\max(F_o^2, 0) + 2F_c^2] / 3$ .

References:

<sup>a</sup> Sheldrick, G. M. *Acta Cryst.* **2008**, *A64*, 112–122.

<sup>b</sup> Sheldrick, G. M. *Acta Cryst.* **2015**, *A71*, 3–8.

<sup>c</sup> Sheldrick, G. M. *Acta Cryst.* **2015**, *C71*, 3–8.

<sup>d</sup> Dolomanov, O.V., Bourhis, L.J., Gildea, R.J., Howard, J. A. K., Puschmann, H. *J. Appl. Cryst.* **2009**, *42*, 339–341.

<sup>e</sup> Spek, A. L. *J. Appl. Cryst.* **2003**, *36*, 7–13.

## 10. Spectral Characterization Data for the Products

### Ethyl (S)-2-(4-methoxybenzyl)-1-oxo-4-phenyl-1,2-dihydronaphthalene-2-carboxylate (B1)

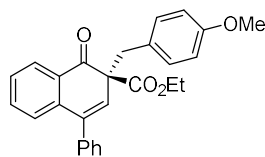

**Result:** colorless oil, 80% yield, 98% ee;  $[\alpha]^{26.6} = -72.9$  ( $c = 1.12$  in  $\text{CH}_2\text{Cl}_2$ ,  $\lambda = 589$  nm); SFC (Daicel chiralcel OZ-3,  $\text{CO}_2/\text{MeOH} = 90/10$ , flow rate = 1.5 mL/min,  $\lambda = 254$  nm),  $t_1 = 6.03$  min,  $t_2 = 7.15$  min.

**$^1\text{H NMR}$**  (400 MHz, Chloroform- $d$ )  $\delta$  8.07 (d,  $J = 7.7$  Hz, 1H), 7.41 (m, 4H), 7.32 (m, 1H), 7.25 – 7.20 (m, 2H), 7.04 (d,  $J = 8.6$  Hz, 2H), 6.96 (d,  $J = 7.7$  Hz, 1H), 6.63 (d,  $J = 8.6$  Hz, 2H), 6.04 (s, 1H), 4.19 (q,  $J = 7.1$  Hz, 2H), 3.68 (s, 3H), 3.50 (dd,  $J = 89.2, 13.4$  Hz, 2H), 1.21 (t,  $J = 7.1$  Hz, 3H).

**$^{13}\text{C NMR}$**  (101 MHz, Chloroform- $d$ )  $\delta$  196.6 , 169.9 , 158.3 , 138.8 , 138.3 , 137.9 , 134.2 , 131.3 , 130.7 , 129.2 , 128.9 , 128.4 , 128.1 , 127.8 , 127.2 , 127.2 , 126.7 , 113.0 , 61.9 , 61.9 , 55.1 , 41.8 , 14.0 .

**HRMS** (ESI) Calculated for  $\text{C}_{27}\text{H}_{24}\text{O}_4$  ( $[\text{M}]+\text{Na}^+$ ) = 435.1567, Found 435.1573.

**IR** (neat) 3746, 3060, 2981, 2328, 2054, 1988, 1738, 1641, 1593, 1443, 1364, 1254, 1217, 1179, 1036, 943, 896, 750, 576  $\text{cm}^{-1}$ .

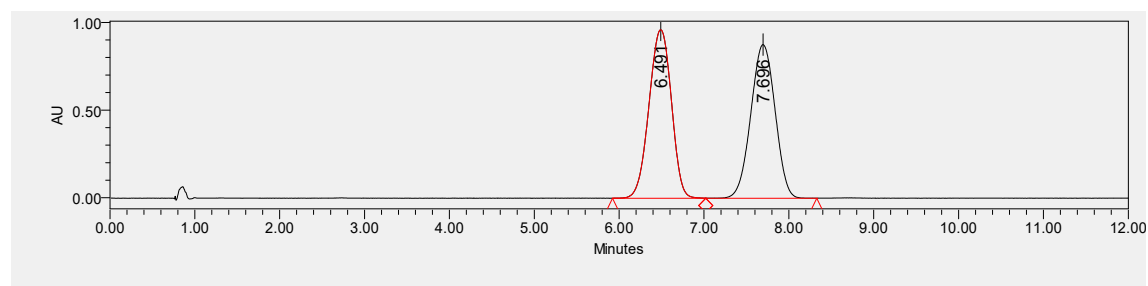

|   | Retention Time | Area     | % Area |
|---|----------------|----------|--------|
| 1 | 6.491          | 17607040 | 50.29  |
| 2 | 7.696          | 17407170 | 49.71  |

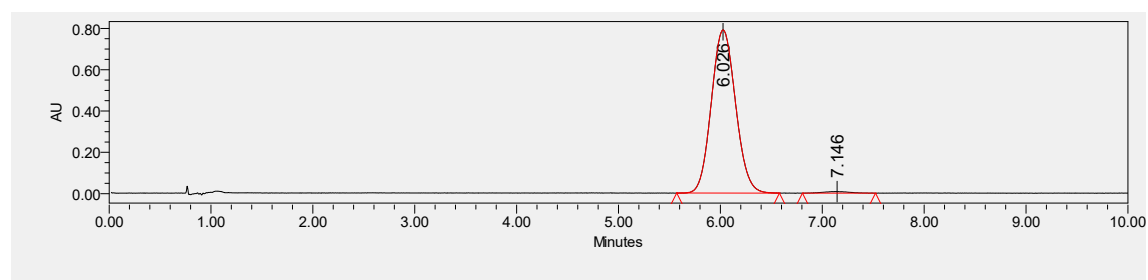

|   | Retention Time | Area     | % Area |
|---|----------------|----------|--------|
| 1 | 6.026          | 13041122 | 99.03  |
| 2 | 7.146          | 127971   | 0.97   |

### Methyl (S)-2-(4-methoxybenzyl)-1-oxo-4-phenyl-1,2-dihydronaphthalene-2-carboxylate (B2)

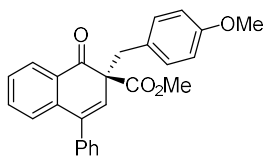

**Result:** colorless oil, 76% yield, 90% ee;  $[\alpha]^{26.7} = -80.9$  ( $c = 0.77$  in  $\text{CH}_2\text{Cl}_2$ ,  $\lambda = 589$  nm); SFC (Daicel chiralcel OZ-3,  $\text{CO}_2/\text{MeOH} = 90/10$ , flow rate = 1.5 mL/min,  $\lambda = 254$  nm),  $t_1 = 6.43$  min,  $t_2 = 7.59$  min.

**$^1\text{H}$  NMR** (400 MHz, Chloroform- $d$ )  $\delta$  8.07 (dd,  $J = 7.7, 1.6$  Hz, 1H), 7.45 – 7.38 (m, 4H), 7.32 (td,  $J = 7.5, 1.3$  Hz, 1H), 7.26 – 7.20 (m, 2H), 7.03 (d,  $J = 8.7$  Hz, 2H), 6.97 (d,  $J = 7.5$  Hz, 1H), 6.63 (d,  $J = 8.7$  Hz, 2H), 6.04 (s, 1H), 3.72 (s, 3H), 3.68 (s, 3H), 3.51 (dd,  $J = 86.2, 13.4$  Hz, 2H).

**$^{13}\text{C}$  NMR** (101 MHz, Chloroform- $d$ )  $\delta$  196.3, 170.5, 158.4, 138.7, 138.4, 137.9, 134.3, 131.3, 130.6, 129.2, 128.9, 128.4, 128.2, 127.8, 127.3, 127.1, 126.8, 113.0, 61.8, 55.10, 53.0, 42.0.

**HRMS** (ESI) Calculated for  $\text{C}_{26}\text{H}_{22}\text{O}_4$  ( $[\text{M}]+\text{Na}^+$ ) = 421.1410, Found 421.1411.

**IR** (neat) 3746, 3059, 3031, 2952, 2055, 1986, 1742, 1641, 1592, 1442, 1355, 1179, 1035, 946, 894, 775, 637, 576  $\text{cm}^{-1}$ .

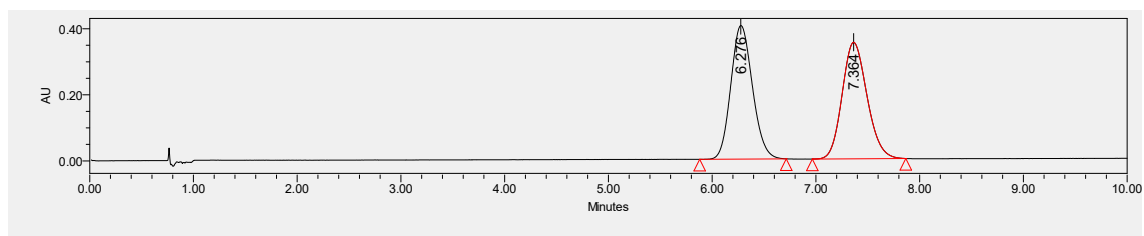

|   | Retention Time | Area    | % Area |
|---|----------------|---------|--------|
| 1 | 6.276          | 5860908 | 49.98  |
| 2 | 7.364          | 5866483 | 50.02  |

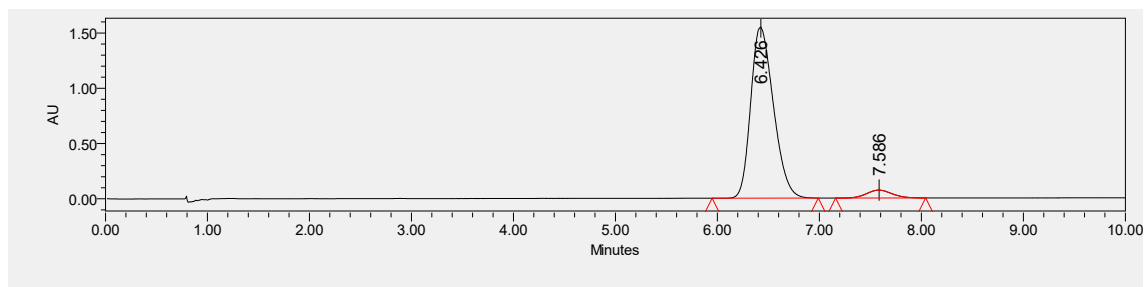

|   | Retention Time | Area     | % Area |
|---|----------------|----------|--------|
| 1 | 6.426          | 23920234 | 95.07  |
| 2 | 7.586          | 1240377  | 4.93   |

### Isopropyl (S)-2-(4-methoxybenzyl)-1-oxo-4-phenyl-1,2-dihydronaphthalene-2-carboxylate (B3)

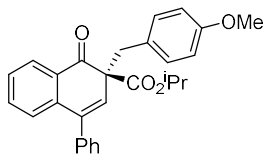

**Result:** colorless oil, 75% yield, 97% ee;  $[\alpha]^{26.7} = -36.9$  ( $c = 0.71$  in  $\text{CH}_2\text{Cl}_2$ ,  $\lambda = 589$  nm); SFC (Daicel chiralcel OZ-3,  $\text{CO}_2/\text{MeOH} = 90/10$ , flow rate = 1.5 mL/min,  $\lambda = 254$  nm),  $t_1 = 5.20$  min,  $t_2 = 6.18$  min.

**$^1\text{H}$  NMR** (400 MHz, Chloroform- $d$ )  $\delta$  8.06 (dd,  $J = 7.6, 1.5$  Hz, 1H), 7.44 – 7.37 (m, 4H), 7.31 (td,  $J = 7.5, 1.3$  Hz, 1H), 7.22 (dd,  $J = 7.7, 1.8$  Hz, 2H), 7.04 (d,  $J = 8.6$  Hz, 2H), 6.95 (d,  $J = 6.9$  Hz, 1H), 6.63 (d,  $J = 8.7$  Hz, 2H), 6.03 (s, 1H), 5.06 (hept,  $J = 6.2$  Hz, 1H), 3.68 (s, 3H), 3.49 (dd,  $J = 92.0, 13.5$  Hz, 2H), 1.18 (t,  $J = 5.9$  Hz, 6H).

**$^{13}\text{C}$  NMR** (101 MHz, Chloroform- $d$ )  $\delta$  196.5, 169.4, 158.3, 138.9, 138.3, 137.9, 134.1, 131.3, 130.9, 129.3, 128.9, 128.4, 128.0, 127.8, 127.4, 127.2, 126.7, 113.0, 69.5, 62.1, 55.1, 41.5, 21.5, 21.4.

**HRMS** (ESI) Calculated for  $\text{C}_{28}\text{H}_{26}\text{O}_4$  ( $[\text{M}] + \text{Na}^+$ ) = 449.1723, Found 449.1732.

**IR** (neat) 3746, 3060, 2982, 2835, 2055, 1736, 1641, 1443, 1374, 1276, 1179, 1035, 943, 864, 763, 637, 576  $\text{cm}^{-1}$ .

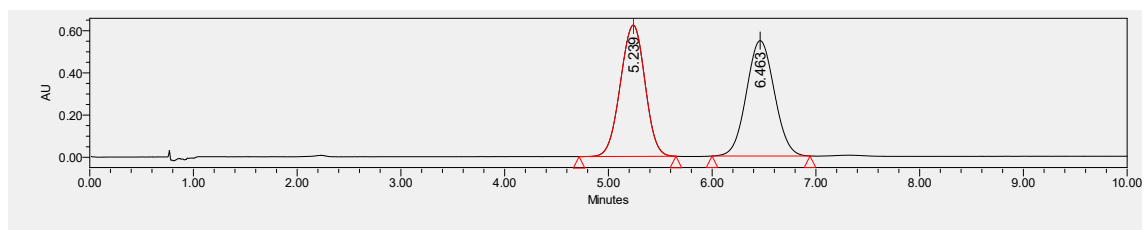

|   | Retention Time | Area     | % Area |
|---|----------------|----------|--------|
| 1 | 5.239          | 10244030 | 50.05  |
| 2 | 6.463          | 10222367 | 49.95  |

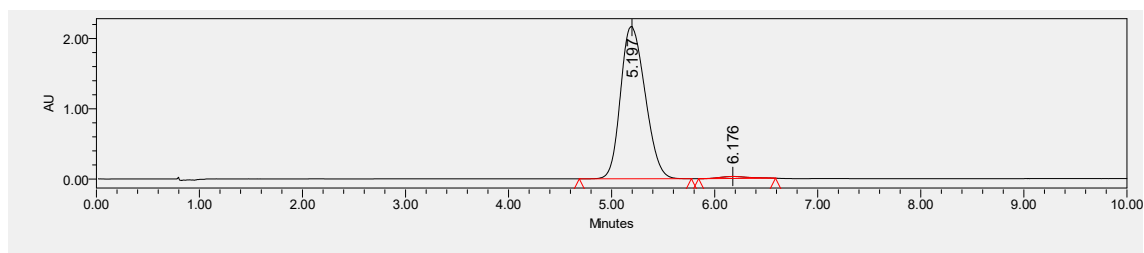

|   | Retention Time | Area     | % Area |
|---|----------------|----------|--------|
| 1 | 5.197          | 35879660 | 98.49  |
| 2 | 6.176          | 551938   | 1.51   |

### Benzyl (S)-2-(4-methoxybenzyl)-1-oxo-4-phenyl-1,2-dihydronaphthalene-2-carboxylate (B4)

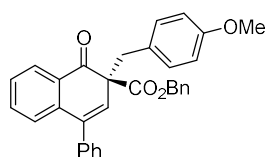

**Result:** colorless oil, 70% yield, 97% ee;  $[\alpha]^{26.1} = -9.3$  ( $c = 0.78$  in  $\text{CH}_2\text{Cl}_2$ ,  $\lambda = 589$  nm); SFC (Daicel chiralcel OZ-3,  $\text{CO}_2/\text{MeOH} = 90/10$ , flow rate = 1.5 mL/min,  $\lambda = 254$  nm),  $t_1 = 13.30$  min,  $t_2 = 16.52$  min.

**$^1\text{H}$  NMR** (400 MHz, Chloroform- $d$ )  $\delta$  8.08 (dd,  $J = 7.7, 1.6$  Hz, 1H), 7.42 – 7.38 (m, 4H), 7.36 – 7.27 (m, 4H), 7.23 (m, 2H), 7.20 – 7.16 (m, 2H), 7.03 (d,  $J = 8.7$  Hz, 2H), 6.96 (d,  $J = 7.5$  Hz, 1H), 6.63 (d,  $J = 8.7$  Hz, 2H), 6.04 (s, 1H), 5.27 – 5.11 (d, 2H), 3.67 (d,  $J = 12.7$  Hz, 4H), 3.41 (d,  $J = 13.5$  Hz, 1H).

**$^{13}\text{C}$  NMR** (101 MHz, Chloroform- $d$ )  $\delta$  196.1 , 169.6 , 158.3 , 138.7 , 138.6 , 137.9 , 135.6 , 134.3 , 131.3 , 130.5 , 129.3 , 128.8 , 128.4 , 128.2 , 128.0 , 127.8 , 127.5 , 127.3 , 127.2 , 126.8 , 113.1 , 67.2 , 62.0 , 55.1 , 41.6 .

**HRMS** (ESI) Calculated for  $\text{C}_{32}\text{H}_{26}\text{O}_4$  ( $[\text{M}]+\text{Na}^+$ ) = 497.1723, Found 497.1732.

**IR** (neat) 3746, 3062, 3006, 2835, 2349, 1990, 1742, 1676, 1512, 1443, 1276, 1178, 1035, 944, 832, 763, 659, 556  $\text{cm}^{-1}$ .

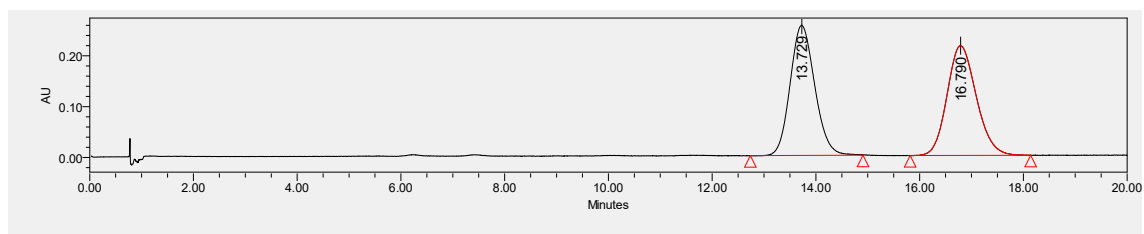

|   | Retention Time | Area    | % Area |
|---|----------------|---------|--------|
| 1 | 13.729         | 8426386 | 49.99  |
| 2 | 16.790         | 8429148 | 50.01  |

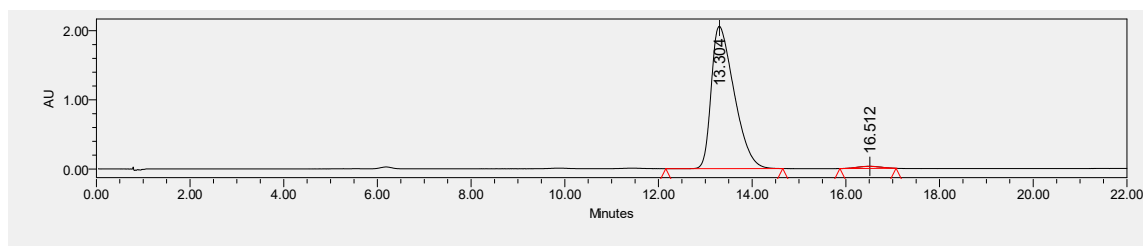

|   | Retention Time | Area     | % Area |
|---|----------------|----------|--------|
| 1 | 13.304         | 69681932 | 98.50  |
| 2 | 16.512         | 1063775  | 1.50   |

**Adamantan-1-yl (S)-2-(4-methoxybenzyl)-1-oxo-4-phenyl-1,2-dihydronaphthalene-2-carboxylate (B5)**

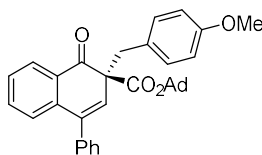

**Result:** White solid, Mp: 66-68 °C, 70% yield, 99% ee;  $[\alpha]^{26.7} = 58.4$  ( $c = 0.83$  in  $\text{CH}_2\text{Cl}_2$ ,  $\lambda = 589$  nm); SFC (Daicel chiralcel OZ-3,  $\text{CO}_2/\text{MeOH} = 80/20$ , flow rate = 1.5 mL/min,  $\lambda = 254$  nm),  $t_1 = 7.11$  min,  $t_2 = 13.34$  min.

**$^1\text{H NMR}$**  (400 MHz, Chloroform- $d$ )  $\delta$  8.06 (dd,  $J = 7.7, 1.6$  Hz, 1H), 7.44 – 7.35 (m, 4H), 7.31 (td,  $J = 7.5, 1.3$  Hz, 1H), 7.22 (dd,  $J = 7.7, 1.8$  Hz, 2H), 7.04 (d,  $J = 8.5$  Hz, 2H), 6.95 (d,  $J = 9.1$  Hz, 1H), 6.64 (d,  $J = 8.6$  Hz, 2H), 6.04 (s, 1H), 3.68 (s, 3H), 3.47 (dd,  $J = 115.7, 13.6$  Hz, 2H), 2.12 (s, 3H), 2.01 (d,  $J = 2.8$  Hz, 6H), 1.61 (s, 6H).

**$^{13}\text{C NMR}$**  (101 MHz, Chloroform- $d$ )  $\delta$  196.6, 168.2, 158.2, 139.1, 138.0, 137.9, 134.0, 131.4, 131.2, 129.4, 128.9, 128.4, 127.9, 127.8, 127.7, 127.1, 126.6, 113.0, 82.4, 62.9, 55.1, 41.0, 36.0, 30.8.

**HRMS** (ESI) Calculated for  $\text{C}_{35}\text{H}_{34}\text{O}_4$  ( $[\text{M}] + \text{Na}^+$ ) = 541.2349, Found 541.2361.

**IR** (neat) 3746, 3059, 2911, 2835, 2349, 2055, 1989, 1733, 1641, 1593, 1443, 1276, 1179, 1038, 964, 890, 763, 638, 556  $\text{cm}^{-1}$ .

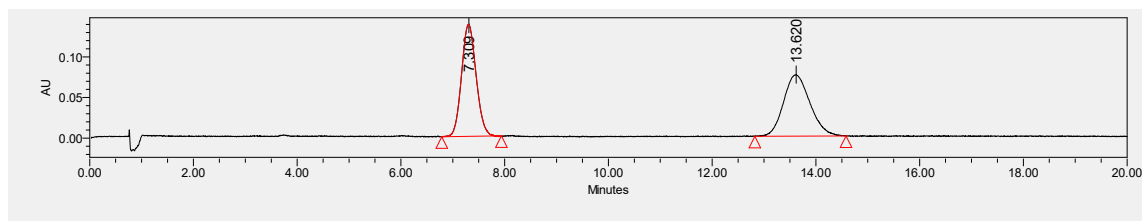

|   | Retention Time | Area    | % Area |
|---|----------------|---------|--------|
| 1 | 7.309          | 2683357 | 50.07  |
| 2 | 13.620         | 2676195 | 49.93  |

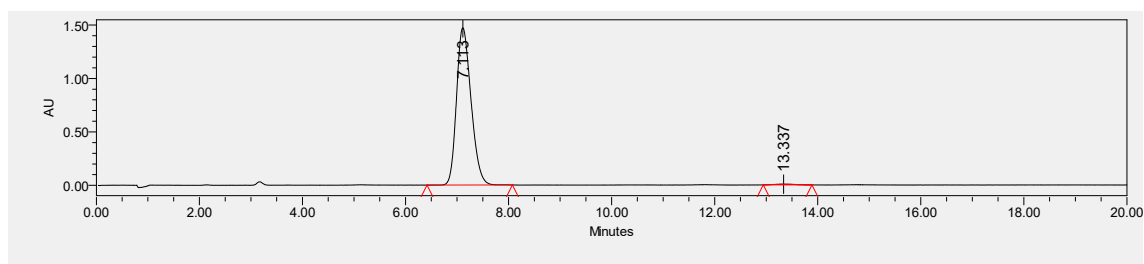

|   | Retention Time | Area     | % Area |
|---|----------------|----------|--------|
| 1 | 7.113          | 28792928 | 99.40  |
| 2 | 13.337         | 174067   | 0.60   |

**Diethyl (S)-(2-(4-methoxybenzyl)-1-oxo-4-phenyl-1,2-dihydronaphthalen-2-yl)phosphonate (B6)**

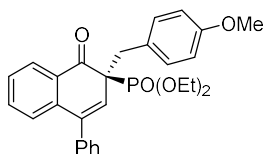

**Result:** colorless oil, 62% yield, 99% ee;  $[\alpha]^{26.5} = 101.0$  ( $c = 0.60$  in  $\text{CH}_2\text{Cl}_2$ ,  $\lambda = 589$  nm); SFC (Daicel chiralcel OZ-3,  $\text{CO}_2/\text{MeOH} = 90/10$ , flow rate = 1.5 mL/min,  $\lambda = 254$  nm),  $t_2 = 16.64$  min.

**$^1\text{H}$  NMR** (400 MHz, Chloroform-*d*)  $\delta$  8.10 (dd,  $J = 6.7$  Hz, 1H), 7.44 – 7.37 (m, 4H), 7.35 – 7.30 (m, 1H), 7.19 (d,  $J = 5.8$  Hz, 2H), 7.04 (m, 3H), 6.65 (d,  $J = 8.6$  Hz, 2H), 6.24 (d,  $J = 5.4$  Hz, 1H), 4.22 – 3.99 (m, 5H), 3.69 (s, 3H), 3.28 (dd,  $J = 13.5, 9.0$  Hz, 1H), 1.32 (t,  $J = 7.1$  Hz, 3H), 1.09 (t,  $J = 7.0$  Hz, 3H).

**$^{13}\text{C}$  NMR** (101 MHz, Chloroform-*d*)  $\delta$  195.3, 195.2, 158.2, 139.0, 138.9, 138.0, 137.9, 134.1, 130.9, 130.2, 123.0, 129.8, 128.9, 128.9, 128.6, 128.4, 128.0, 127.7, 127.2, 126.6, 113.3, 64.1, 64.0, 63.8, 63.7, 60.3, 59.1, 55.1, 38.3, 38.3, 16.4, 16.4, 16.3, 16.2.

**$^{31}\text{P}$  NMR** (162 MHz, Chloroform-*d*)  $\delta$  18.56.

**HRMS** (ESI) Calculated for  $\text{C}_{28}\text{H}_{29}\text{O}_5\text{P}$  ( $[\text{M}] + \text{Na}^+$ ) = 499.1645, Found 499.1644.

**IR** (neat) 3747, 3469, 3060, 2835, 2349, 1988, 1640, 1592, 1443, 1357, 1275, 1179, 966, 880, 777, 659, 583  $\text{cm}^{-1}$ .

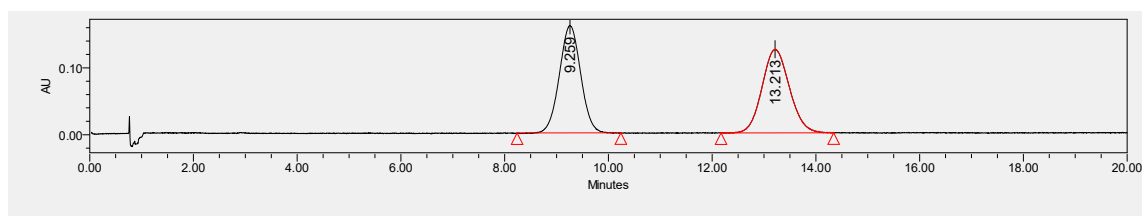

|   | Retention Time | Area    | % Area |
|---|----------------|---------|--------|
| 1 | 9.259          | 4564978 | 49.99  |
| 2 | 13.213         | 4566484 | 50.01  |

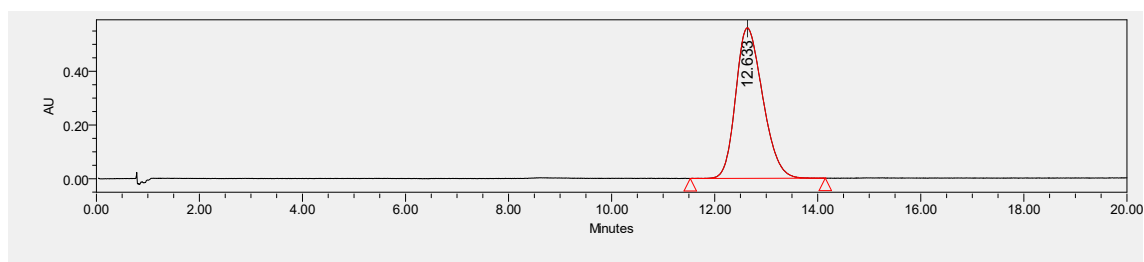

|   | Retention Time | Area     | % Area |
|---|----------------|----------|--------|
| 1 | 12.633         | 20368533 | 100.00 |

**(R)-2-acetyl-2-(4-methoxybenzyl)-4-phenylnaphthalen-1(2H)-one (B7)**

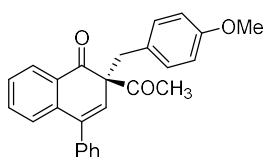

**Result:** colorless oil, 63% yield, 97% ee;  $[\alpha]^{26.7} = 102.8$  ( $c = 0.39$  in  $\text{CH}_2\text{Cl}_2$ ,  $\lambda = 589$  nm); SFC (Daicel chiralcel IG-3,  $\text{CO}_2/\text{MeOH} = 80/20$ , flow rate = 1.5 mL/min,  $\lambda = 254$  nm),  $t_1 = 7.42$  min,  $t_2 = 7.92$  min.

**$^1\text{H}$  NMR** (400 MHz, Chloroform-*d*)  $\delta$  8.09 (dd,  $J = 7.7, 1.5$  Hz, 1H), 7.46 – 7.40 (m, 4H), 7.35 (m, 1H), 7.24 – 7.19 (m, 2H), 7.01 (m, 1H), 6.97 (m, 2H), 6.61 (d,  $J = 8.7$  Hz, 2H), 5.96 (s, 1H), 3.67 (s, 3H), 3.44 (dd,  $J = 100.6, 13.6$  Hz, 2H), 2.12 (s, 3H).

**$^{13}\text{C}$  NMR** (101 MHz, Chloroform-*d*)  $\delta$  201.2, 197.71, 158.2, 139.6, 138.6, 138.1, 134.4, 131.0, 130.9, 129.6, 128.8, 128.5, 128.4, 128.0, 127.7, 127.2, 127.1, 113.0, 69.7, 55.1, 41.3, 27.9.

**HRMS** (ESI) Calculated for  $\text{C}_{26}\text{H}_{22}\text{O}_3$  ( $[\text{M}] + \text{Na}^+$ ) = 405.1461, Found 405.1465.

**IR** (neat) 3746, 3005, 2835, 2349, 2054, 1988, 1723, 1666, 1592, 1443, 1279, 1176, 1034, 941, 885, 763, 659, 563  $\text{cm}^{-1}$ .

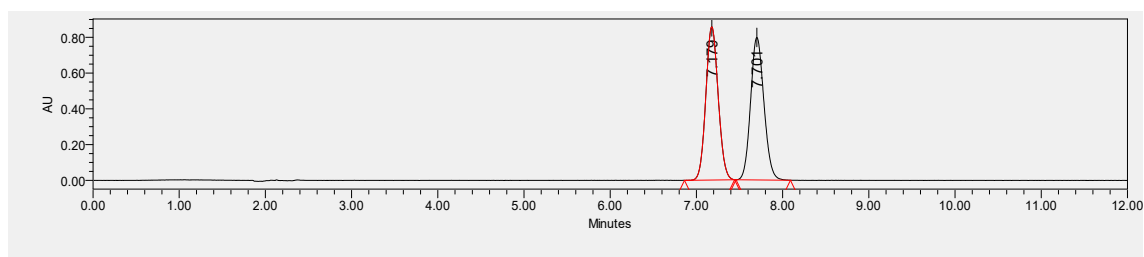

|   | Retention Time | Area    | % Area |
|---|----------------|---------|--------|
| 1 | 7.179          | 8532379 | 49.88  |
| 2 | 7.701          | 8574083 | 50.12  |

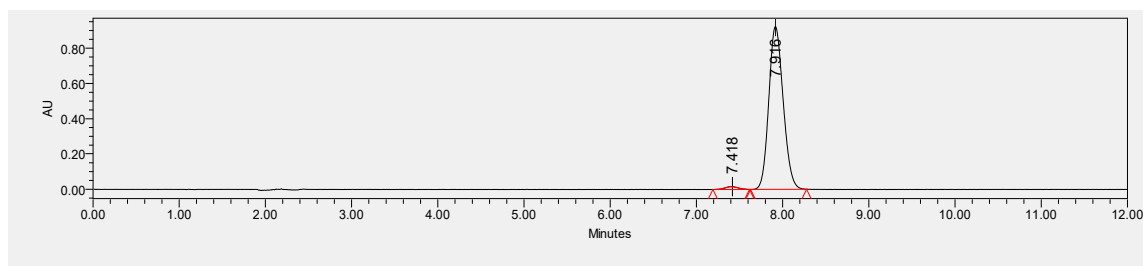

|   | Retention Time | Area     | % Area |
|---|----------------|----------|--------|
| 1 | 7.418          | 167204   | 1.54   |
| 2 | 7.916          | 10679816 | 98.46  |



### Ethyl (S)-2-(4-methoxybenzyl)-1-oxo-3,4-diphenyl-1,2-dihydronaphthalene-2-carboxylate (B8)

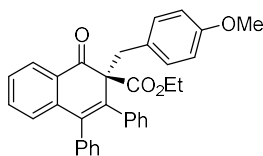

**Result:** colorless oil, 70% yield, 99% ee;  $[\alpha]^{24.5} = 31.8$  ( $c = 0.59$  in  $\text{CH}_2\text{Cl}_2$ ,  $\lambda = 589$  nm); SFC (Daicel chiralcel OZ-3,  $\text{CO}_2/\text{MeOH} = 90/10$ , flow rate = 1.5 mL/min,  $\lambda = 254$  nm),  $t_1 = 9.00$  min,  $t_2 = 12.18$  min.

$^1\text{H NMR}$  (400 MHz, Chloroform- $d$ )  $\delta$  7.9<sup>26.6</sup> (1H), 6.57 (d,  $J = 8.7$  Hz, 2H), 4.13 – 3.99 (m, 2H), 3.74 (d,  $J = 14.3$  Hz, 1H), 3.65 (s, 3H), 3.48 (d,  $J = 14.2$  Hz, 1H), 1.12 (t,  $J = 7.1$  Hz, 3H).

$^{13}\text{C NMR}$  (101 MHz, Chloroform- $d$ )  $\delta$  197.6, 170.00, 158.3, 139.7, 139.3, 137.9, 137.5, 134.2, 131.0, 130.6, 130.3, 123.0, 128.9, 127.9, 127.9, 127.8, 127.5, 127.5, 127.1, 127.0, 126.9, 126.6, 112.9, 66.2, 61.7, 55.1, 41.3, 13.8.

**HRMS** (ESI) Calculated for  $\text{C}_{33}\text{H}_{28}\text{O}_4$  ( $[\text{M}] + \text{Na}^+$ ) = 511.1880, Found 511.1888.

**IR** (neat) 3747, 3005, 2988, 2349, 1987, 1744, 1675, 1513, 1442, 1275, 1179, 1035, 923, 844, 763, 660, 574  $\text{cm}^{-1}$ .

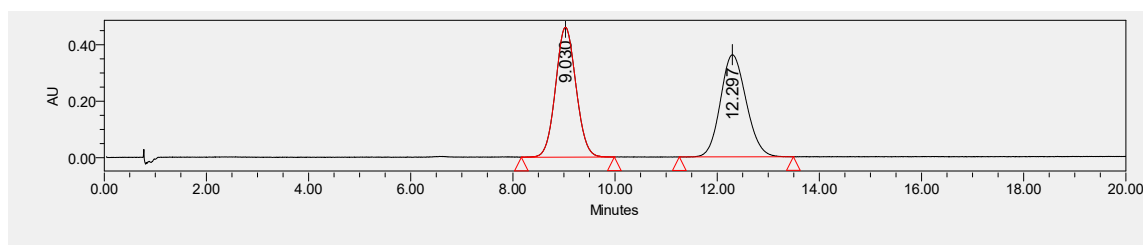

|   | Retention Time | Area     | % Area |
|---|----------------|----------|--------|
| 1 | 9.030          | 12757189 | 50.25  |
| 2 | 12.297         | 12627732 | 49.75  |

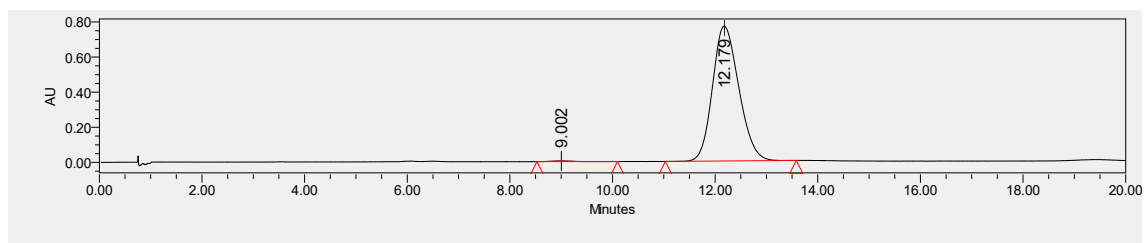

|   | Retention Time | Area     | % Area |
|---|----------------|----------|--------|
| 1 | 9.002          | 91683    | 0.33   |
| 2 | 12.179         | 27333223 | 99.67  |

**Diethyl (S)-2-(4-methoxybenzyl)-1-oxo-4-phenyl-1,2-dihydronaphthalene-2,3-dicarboxylate (B9)**

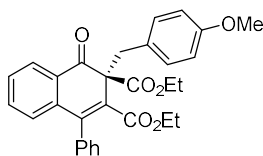

**Result:** colorless oil, 95% yield, 98% ee;  $[\alpha]_D^{26.8} = -134.1$  ( $c = 1.01$  in  $\text{CH}_2\text{Cl}_2$ ,  $\lambda = 589$  nm); SFC (Daicel chiralcel OZ-3,  $\text{CO}_2/\text{MeOH} = 90/10$ , flow rate = 1.5 mL/min,  $\lambda = 254$  nm),  $t_1 = 9.45$  min,  $t_2 = 14.97$  min.

**$^1\text{H}$  NMR** (400 MHz, Chloroform-*d*)  $\delta$  8.04 – 7.93 (dd, 1H), 7.39 (m, 3H), 7.33 – 7.27 (m, 2H), 7.15 – 7.10 (m, 1H), 7.07 (m, 1H), 6.95 (d,  $J = 8.6$  Hz, 2H), 6.63 – 6.58 (dd, 1H), 6.52 (d,  $J = 8.6$  Hz, 2H), 4.31 – 4.16 (m, 2H), 3.91 (q,  $J = 7.5, 1.0$  Hz, 2H), 3.75 (d,  $J = 13.6$  Hz, 1H), 3.62 (s, 4H), 1.22 (t,  $J = 7.1$  Hz, 3H), 0.86 (t,  $J = 7.1$  Hz, 3H).

**$^{13}\text{C}$  NMR** (101 MHz, Chloroform-*d*)  $\delta$  195.9, 169.3, 166.6, 158.3, 142.7, 138.0, 137.7, 134.3, 131.4, 130.8, 129.4, 129.3, 128.8, 128.7, 128.6, 128.2, 128.0, 127.7, 126.6, 126.6, 112.7, 63.8, 61.8, 60.8, 55.1, 42.8, 13.9, 13.4.

**HRMS** (ESI) Calculated for  $\text{C}_{30}\text{H}_{28}\text{O}_6$  ( $[\text{M}]+\text{Na}^+$ ) = 507.1778, Found 507.1783.

**IR** (neat) 3747, 3062, 2982, 2836, 1986, 1723, 1612, 1591, 1443, 1367, 1275, 1179, 1073, 929, 864, 764, 660, 599  $\text{cm}^{-1}$ .

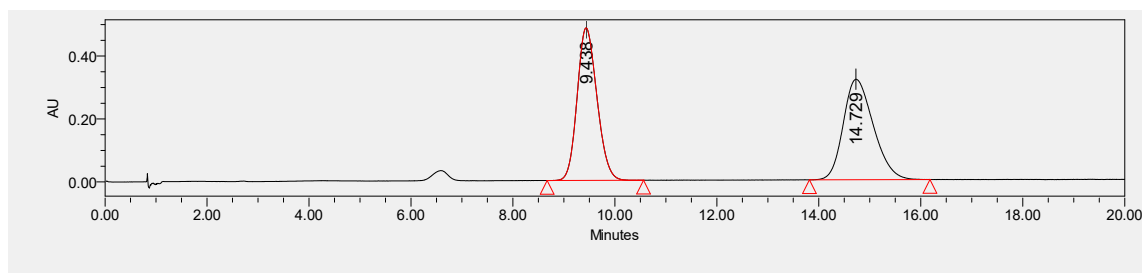

|   | Retention Time | Area     | % Area |
|---|----------------|----------|--------|
| 1 | 9.438          | 13033672 | 49.95  |
| 2 | 14.729         | 13057527 | 50.05  |

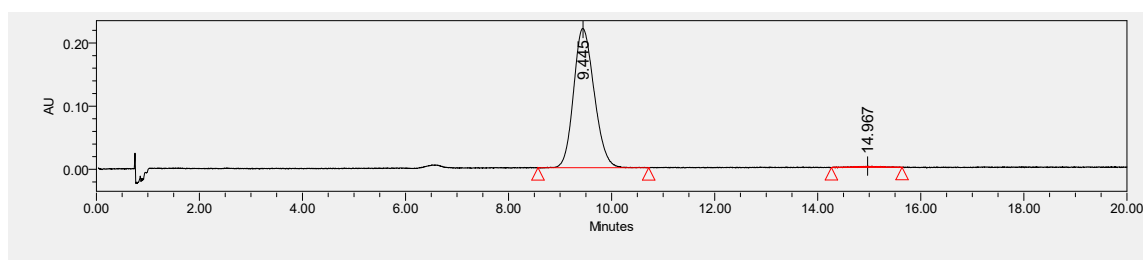

|   | Retention Time | Area    | % Area |
|---|----------------|---------|--------|
| 1 | 9.445          | 6106876 | 99.00  |
| 2 | 14.967         | 61766   | 1.00   |

### Ethyl (S)-2-(4-methoxybenzyl)-1-oxo-1,2-dihydronaphthalene-2-carboxylate (B10)

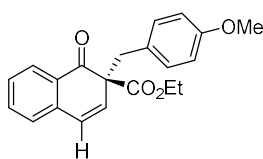

**Result:** White solid, Mp: 101-103 °C, 66% yield, 98% ee;  $[\alpha]^{26.4} = -168.8$  ( $c = 0.46$  in  $\text{CH}_2\text{Cl}_2$ ,  $\lambda = 589$  nm); SFC (Daicel chiralcel OZ-3,  $\text{CO}_2/\text{MeOH} = 90/10$ , flow rate = 1.5 mL/min,  $\lambda = 254$  nm),  $t_1 = 4.78$  min,  $t_2 = 5.48$  min.

**$^1\text{H}$  NMR** (400 MHz, Chloroform-*d*)  $\delta$  7.99 (d,  $J = 8.1$  Hz, 1H), 7.48 (td,  $J = 7.5, 1.4$  Hz, 1H), 7.31 (td,  $J = 7.6, 1.2$  Hz, 1H), 7.11 (d,  $J = 7.5$  Hz, 1H), 7.01 (d,  $J = 8.6$  Hz, 2H), 6.61 (d,  $J = 8.4$  Hz, 3H), 6.13 (d,  $J = 9.8$  Hz, 1H), 4.18 – 4.12 (m, 2H), 3.67 (s, 3H), 3.45 (dd,  $J = 87.0, 13.5$  Hz, 2H), 1.16 (t,  $J = 7.1$  Hz, 3H).

**$^{13}\text{C}$  NMR** (101 MHz, Chloroform-*d*)  $\delta$  196.3, 169.8, 158.3, 137.5, 134.6, 132.0, 131.2, 129.0, 128.3, 127.6, 127.3, 126.9, 126.8, 113.1, 62.0, 61.9, 55.0, 41.3, 13.9.

**HRMS** (ESI) Calculated for  $\text{C}_{21}\text{H}_{20}\text{O}_4$  ( $[\text{M}] + \text{Na}^+$ ) = 359.1254, Found 359.1256.

**IR** (neat) 3747, 3034, 2983, 2835, 2349, 1994, 1737, 1642, 1595, 1453, 1365, 1179, 925, 893, 794, 696, 583  $\text{cm}^{-1}$ .

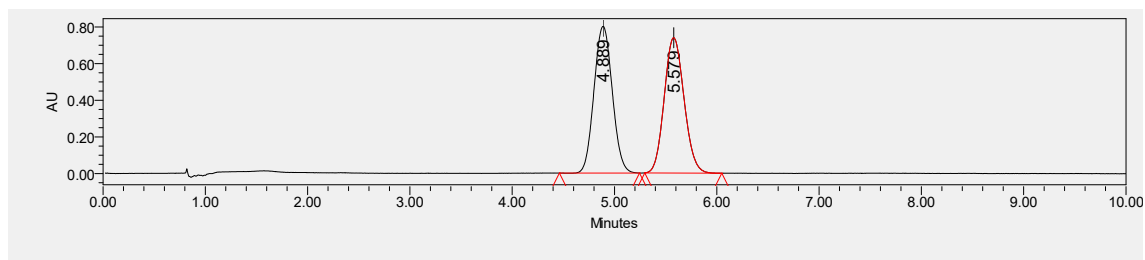

|   | Retention Time | Area    | % Area |
|---|----------------|---------|--------|
| 1 | 4.889          | 9957719 | 50.06  |
| 2 | 5.579          | 9932479 | 49.94  |

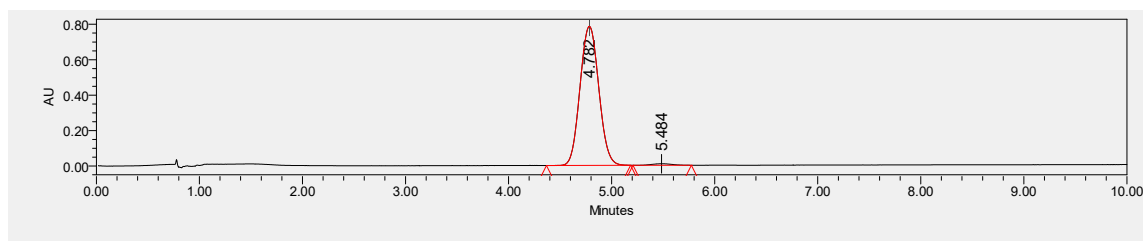

|   | Retention Time | Area    | % Area |
|---|----------------|---------|--------|
| 1 | 4.782          | 9906996 | 98.86  |
| 2 | 5.484          | 114608  | 1.14   |

### Ethyl (S)-4-chloro-2-(4-methoxybenzyl)-1-oxo-1,2-dihydronaphthalene-2-carboxylate (B11)

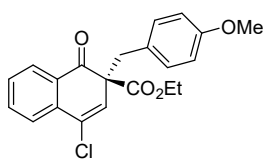

**Result:** colorless oil, 58% yield, 94% ee;  $[\alpha]_D^{26.8} = -105.0$  ( $c = 0.42$  in  $\text{CH}_2\text{Cl}_2$ ,  $\lambda = 589$  nm); SFC (Daicel chiralcel OZ-3,  $\text{CO}_2/\text{MeOH} = 90/10$ , flow rate = 1.5 mL/min,  $\lambda = 254$  nm),  $t_1 = 3.60$  min,  $t_2 = 4.23$  min.

**$^1\text{H}$  NMR** (400 MHz, Chloroform- $d$ )  $\delta$  8.00 (dd,  $J = 7.8, 1.3$  Hz, 1H), 7.64 – 7.57 (m, 2H), 7.40 (td,  $J = 7.9, 7.0, 1.6$  Hz, 1H), 6.99 (d,  $J = 8.7$  Hz, 2H), 6.63 (d,  $J = 8.7$  Hz, 2H), 6.32 (s, 1H), 4.17 (qd,  $J = 7.1, 4.8$  Hz, 2H), 3.67 (s, 3H), 3.55 – 3.33 (m, 2H), 1.18 (t,  $J = 7.1$  Hz, 3H).

**$^{13}\text{C}$  NMR** (101 MHz, Chloroform- $d$ )  $\delta$  194.4, 168.8, 158.4, 134.9, 134.7, 131.2, 129.9, 129.5, 129.3, 128.9, 127.2, 126.6, 125.5, 113.3, 63.3, 62.3, 55.1, 41.8, 13.9.

**HRMS** (ESI) Calculated for  $\text{C}_{21}\text{H}_{19}\text{ClO}_4$  ( $[\text{M}] + \text{Na}^+$ ) = 393.0864, Found 393.0865.

**IR** (neat) 3746, 2985, 2836, 2349, 2055, 1987, 1742, 1632, 1593, 1464, 1276, 1179, 964, 895, 764, 695, 590  $\text{cm}^{-1}$ .

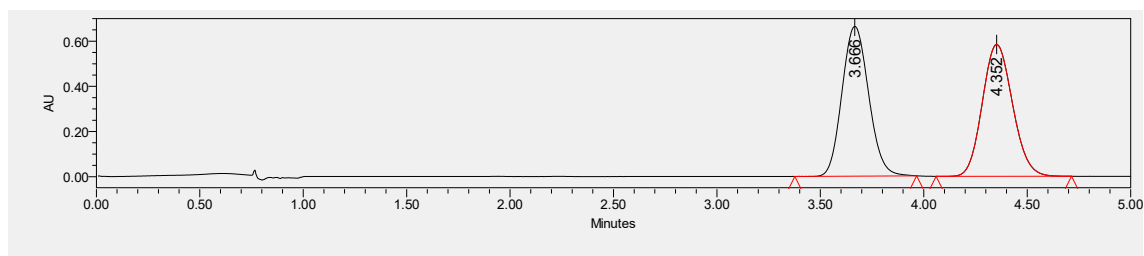

|   | Retention Time | Area    | % Area |
|---|----------------|---------|--------|
| 1 | 3.666          | 5932833 | 50.05  |
| 2 | 4.352          | 5920802 | 49.95  |

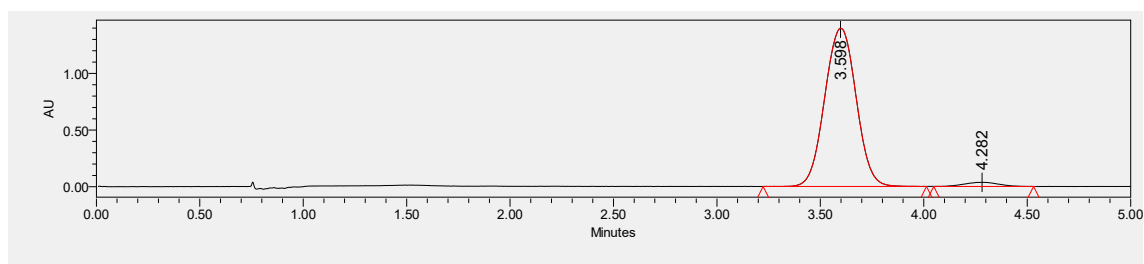

|   | Retention Time | Area     | % Area |
|---|----------------|----------|--------|
| 1 | 3.598          | 14705583 | 97.25  |
| 2 | 4.282          | 416097   | 2.75   |

### Ethyl (S)-4-bromo-2-(4-methoxybenzyl)-1-oxo-1,2-dihydronaphthalene-2-carboxylate (B12)

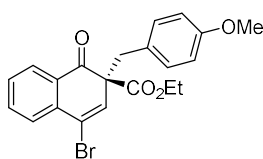

**Result:** colorless oil, 57% yield, 95% ee;  $[\alpha]^{26.8} = -75.3$  ( $c = 0.55$  in  $\text{CH}_2\text{Cl}_2$ ,  $\lambda = 589$  nm); SFC (Daicel chiralcel OZ-3,  $\text{CO}_2/\text{MeOH} = 90/10$ , flow rate = 1.5 mL/min,  $\lambda = 254$  nm),  $t_1 = 4.28$  min,  $t_2 = 5.08$  min.

**$^1\text{H}$  NMR** (400 MHz, Chloroform- $d$ )  $\delta$  7.98 (d,  $J = 7.4$  Hz, 1H), 7.60 – 7.52 (m, 2H), 7.38 (td,  $J = 8.3, 6.4, 2.3$  Hz, 1H), 6.99 (d,  $J = 8.6$  Hz, 2H), 6.63 (d,  $J = 8.5$  Hz, 2H), 6.58 (s, 1H), 4.21 – 4.14 (m, 2H), 3.67 (s, 3H), 3.53 – 3.33 (m, 2H), 1.19 (t,  $J = 7.1$  Hz, 3H).

**$^{13}\text{C}$  NMR** (101 MHz, Chloroform- $d$ )  $\delta$  194.5, 168.5, 158.5, 135.6, 134.8, 133.2, 131.2, 129.6, 129.4, 128.3, 127.1, 126.5, 120.7, 113.3, 64.5, 62.3, 55.1, 41.7, 13.9.

**HRMS** (ESI) Calculated for  $\text{C}_{21}\text{H}_{19}^{79}\text{BrO}_4$  ( $[\text{M}] + \text{Na}^+$ ) = 437.0359, Found 437.0352.

**HRMS** (ESI) Calculated for  $\text{C}_{21}\text{H}_{19}^{81}\text{BrO}_4$  ( $[\text{M}] + \text{Na}^+$ ) = 439.0338, Found 437.0345.

**IR** (neat) 3746, 2988, 2935, 2835, 2343, 1988, 1741, 1590, 1450, 1365, 1276, 1180, 1095, 914, 886, 792, 659  $\text{cm}^{-1}$ .

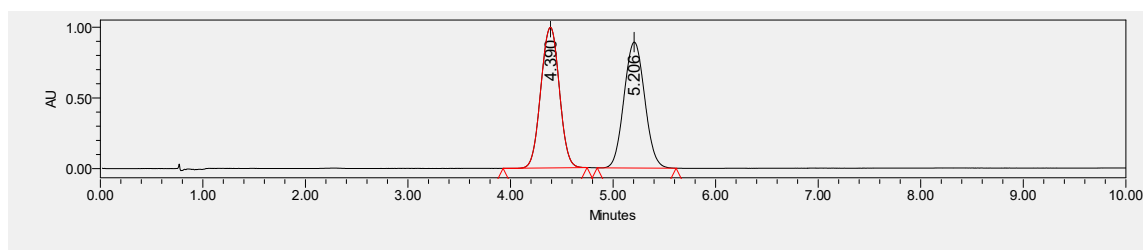

|   | Retention Time | Area     | % Area |
|---|----------------|----------|--------|
| 1 | 4.390          | 12431356 | 49.99  |
| 2 | 5.206          | 12434558 | 50.01  |

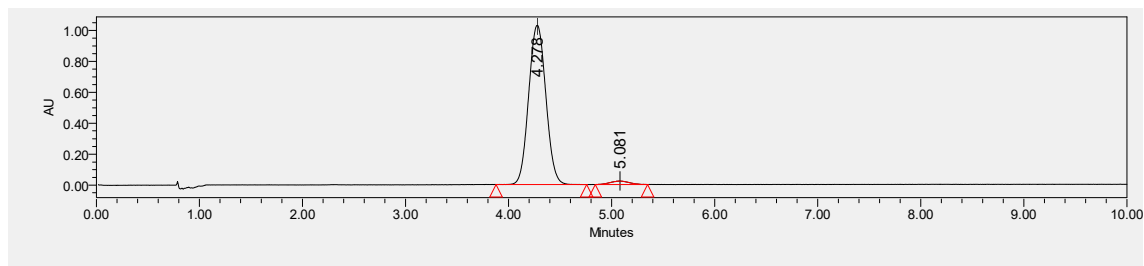

|   | Retention Time | Area     | % Area |
|---|----------------|----------|--------|
| 1 | 4.278          | 11908929 | 97.65  |
| 2 | 5.081          | 286085   | 2.35   |

**Ethyl (S)-2-(4-methoxybenzyl)-4-(4-methoxyphenyl)-1-oxo-1,2-dihydronaphthalene-2-carboxylate (B13)**

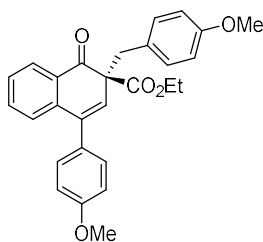

**Result:** colorless oil, 69% yield, 99% *ee*;  $[\alpha]^{26.3} = -37.0$  ( $c = 0.72$  in  $\text{CH}_2\text{Cl}_2$ ,  $\lambda = 589$  nm); SFC (Daicel chiralcel OZ-3,  $\text{CO}_2/\text{MeOH} = 90/10$ , flow rate = 1.5 mL/min,  $\lambda = 254$  nm),  $t_1 = 8.35$  min,  $t_2 = 9.83$  min.

**$^1\text{H}$  NMR** (400 MHz, Chloroform-*d*)  $\delta$  8.05 (dd,  $J = 7.7, 1.5$  Hz, 1H), 7.40 (td,  $J = 7.6, 1.5$  Hz, 1H), 7.31 (td,  $J = 7.5, 1.2$  Hz, 1H), 7.16 (d,  $J = 8.7$  Hz, 2H), 7.01 (m, 3H), 6.95 (d,  $J = 8.7$  Hz, 2H), 6.62 (d,  $J = 8.7$  Hz, 2H), 6.00 (s, 1H), 4.18 (q,  $J = 7.1$  Hz, 2H), 3.86 (s, 3H), 3.68 (s, 3H), 3.49 (dd,  $J = 85.3, 13.4$  Hz, 2H), 1.20 (t,  $J = 7.1$  Hz, 3H).

**$^{13}\text{C}$  NMR** (101 MHz, Chloroform-*d*)  $\delta$  196.5, 170.0, 159.2, 158.3, 158.2, 137.8, 134.2, 131.3, 131.1, 130.5, 130.0, 129.3, 128.0, 127.3, 127.2, 126.7, 113.8, 113.0, 62.0, 61.9, 55.3, 55.1, 41.8, 14.0.

**HRMS** (ESI) Calculated for  $\text{C}_{28}\text{H}_{26}\text{O}_5$  ( $[\text{M}]+\text{Na}^+$ ) = 465.1672, Found 465.1682.

**IR** (neat) 3746, 2989, 2836, 2054, 1987, 1738, 1676, 1641, 1592, 1389, 1276, 1034, 943, 897, 763, 659, 566  $\text{cm}^{-1}$ .

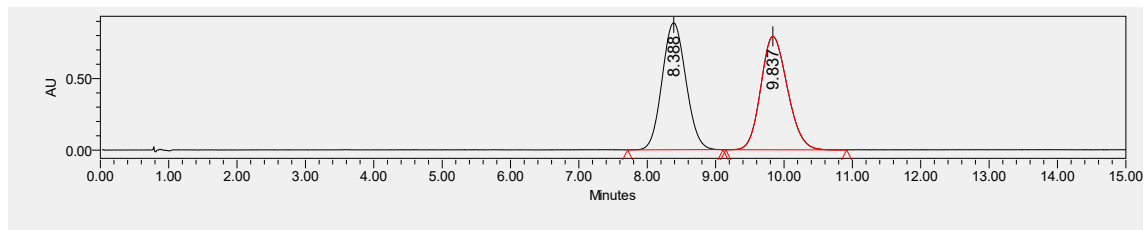

|   | Retention Time | Area     | % Area |
|---|----------------|----------|--------|
| 1 | 8.388          | 21394284 | 50.06  |
| 2 | 9.837          | 21340438 | 49.94  |

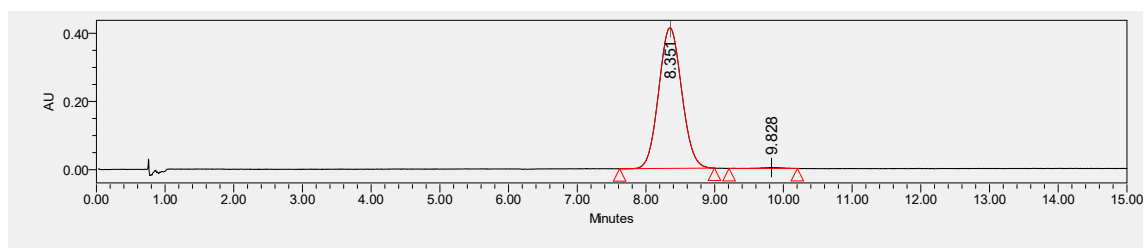

|   | Retention Time | Area    | % Area |
|---|----------------|---------|--------|
| 1 | 8.351          | 9552384 | 99.45  |
| 2 | 9.828          | 53017   | 0.55   |

**Ethyl (S)-4-(4-bromophenyl)-2-(4-methoxybenzyl)-1-oxo-1,2-dihydronaphthalene-2-carboxylate (B14)**

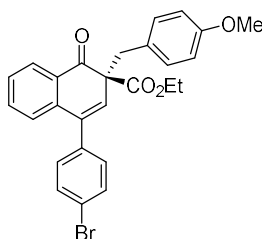

**Result:** White solid, Mp: 93-95 °C, 76% yield, 98% *ee*;  $[\alpha]^{26.7} = -29.0$  ( $c = 0.78$  in  $\text{CH}_2\text{Cl}_2$ ,  $\lambda = 589$  nm); SFC (Daicel chiralcel OZ-3,  $\text{CO}_2/\text{MeOH} = 90/10$ , flow rate = 1.5 mL/min,  $\lambda = 254$  nm),  $t_1 = 9.49$  min,  $t_2 = 10.57$  min.

**$^1\text{H}$  NMR** (400 MHz, Chloroform-*d*)  $\delta$  8.07 (dd,  $J = 7.6, 1.6$  Hz, 1H), 7.55 (d,  $J = 8.5$  Hz, 2H), 7.41 (td,  $J = 7.6, 1.6$  Hz, 1H), 7.33 (td,  $J = 7.5, 1.3$  Hz, 1H), 7.09 (d,  $J = 8.4$  Hz, 2H), 7.00 (d,  $J = 8.7$  Hz, 2H), 6.91 (d,  $J = 7.5$  Hz, 1H), 6.62 (d,  $J = 8.6$  Hz, 2H), 6.02 (s, 1H), 4.19 (d,  $J = 7.1$  Hz, 2H), 3.68 (s, 3H), 3.49 (dd,  $J = 87.8, 13.4$  Hz, 2H), 1.20 (t,  $J = 7.1$  Hz, 3H).

**$^{13}\text{C}$  NMR** (101 MHz, Chloroform-*d*)  $\delta$  196.1, 169.7, 158.4, 137.7, 137.4, 137.3, 134.3, 131.6, 131.3, 131.2, 130.6, 129.2, 128.3, 127.4, 127.2, 126.5, 121.9, 113.1, 62.0, 61.9, 55.1, 41.8, 14.0.

**HRMS** (ESI) Calculated for  $\text{C}_{27}\text{H}_{23}^{79}\text{BrO}_4$  ( $[\text{M}] + \text{Na}^+$ ) = 513.0672, Found 513.0677.

**HRMS** (ESI) Calculated for  $\text{C}_{27}\text{H}_{23}^{81}\text{BrO}_4$  ( $[\text{M}] + \text{Na}^+$ ) = 515.0651, Found 515.0648.

**IR** (neat) 3747, 2988, 2835, 2349, 2055, 1988, 1739, 1677, 1591, 1449, 1276, 1179, 1036, 936, 896, 763, 649  $\text{cm}^{-1}$ .

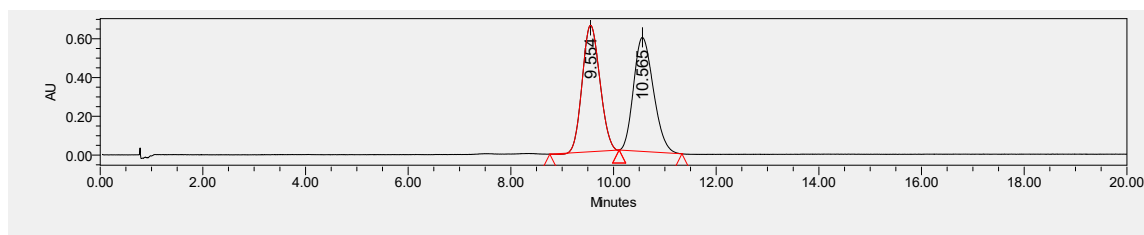

|   | Retention Time | Area     | % Area |
|---|----------------|----------|--------|
| 1 | 9.554          | 15641847 | 49.79  |
| 2 | 10.565         | 15774062 | 50.21  |

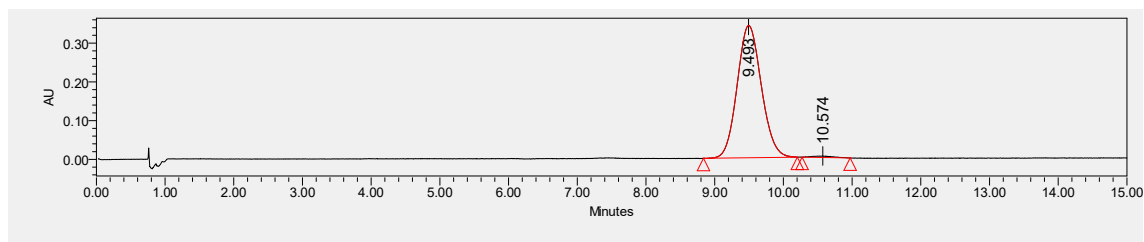

|   | Retention Time | Area    | % Area |
|---|----------------|---------|--------|
| 1 | 9.493          | 8322076 | 99.10  |
| 2 | 10.574         | 75383   | 0.90   |

**Ethyl (S)-2-(4-methoxybenzyl)-1-oxo-4-(thiophen-2-yl)-1,2-dihydronaphthalene-2-carboxylate (B15)**

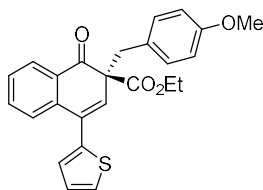

**Result:** colorless oil, 70% yield, 95% *ee*;  $[\alpha]_D^{26.6} = -100.0$  ( $c = 0.60$  in  $\text{CH}_2\text{Cl}_2$ ,  $\lambda = 589$  nm); SFC (Daicel chiralcel OZ-3,  $\text{CO}_2/\text{MeOH} = 90/10$ , flow rate = 1.5 mL/min,  $\lambda = 254$  nm),  $t_1 = 7.18$  min,  $t_2 = 8.60$  min.

**$^1\text{H}$  NMR** (400 MHz, Chloroform-*d*)  $\delta$  8.05 (dd,  $J = 7.7, 1.5$  Hz, 1H), 7.45 (td,  $J = 7.6, 1.5$  Hz, 1H), 7.41 – 7.26 (m, 3H), 7.10 (dd,  $J = 5.2, 3.5$  Hz, 1H), 7.05 – 7.00 (m, 3H), 6.62 (d,  $J = 8.6$  Hz, 2H), 6.24 (s, 1H), 4.19 (qd,  $J = 7.1, 2.1$  Hz, 2H), 3.67 (s, 3H), 3.58 – 3.37 (m, 2H), 1.20 (t,  $J = 7.1$  Hz, 3H).

**$^{13}\text{C}$  NMR** (101 MHz, Chloroform-*d*)  $\delta$  195.9, 169.9, 158.4, 139.4, 137.3, 134.4, 132.8, 131.3, 131.3, 129.1, 128.4, 127.3, 127.1, 127.0, 126.4, 125.3, 1131, 62.3, 62.0, 55.1, 41.9, 14.0.

**HRMS** (ESI) Calculated for  $\text{C}_{25}\text{H}_{22}\text{O}_4\text{S}$  ( $[\text{M}] + \text{Na}^+$ ) = 441.1131, Found 441.1133.

**IR** (neat) 3747, 3068, 2981, 2835, 2054, 1996, 1739, 1677, 1592, 1449, 1363, 1288, 1179, 1035, 939, 839, 794, 660, 570  $\text{cm}^{-1}$ .

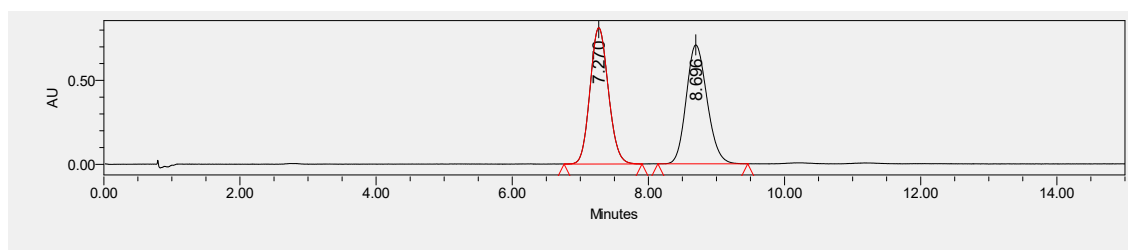

|   | Retention Time | Area     | % Area |
|---|----------------|----------|--------|
| 1 | 7.270          | 15128483 | 50.08  |
| 2 | 8.696          | 15077389 | 49.92  |

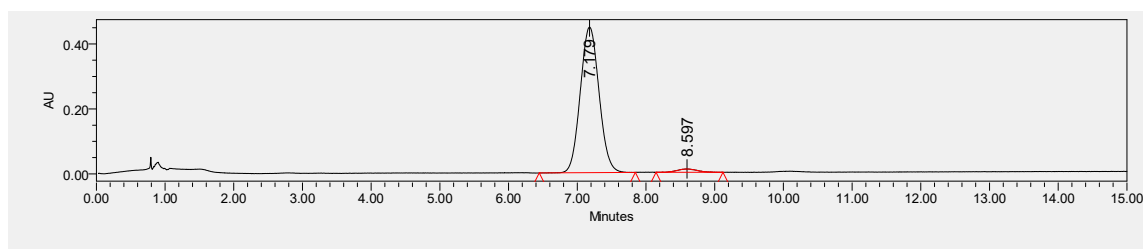

|   | Retention Time | Area    | % Area |
|---|----------------|---------|--------|
| 1 | 7.179          | 8495312 | 97.69  |
| 2 | 8.597          | 200503  | 2.31   |



### Ethyl (S)-4-cyclopropyl-2-(4-methoxybenzyl)-1-oxo-1,2-dihydronaphthalene-2-carboxylate (B16)

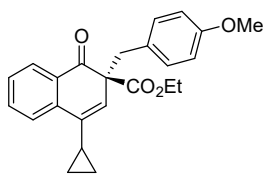

**Result:** colorless oil, 72% yield, 98% *ee*;  $[\alpha]^{26.0} = -83.0$  ( $c = 0.61$  in  $\text{CH}_2\text{Cl}_2$ ,  $\lambda = 589$  nm); SFC (Daicel chiralcel OZ-3,  $\text{CO}_2/\text{MeOH} = 90/10$ , flow rate = 1.5 mL/min,  $\lambda = 254$  nm),  $t_1 = 5.12$  min,  $t_2 = 6.89$  min.

**$^1\text{H}$  NMR** (400 MHz, Chloroform-*d*)  $\delta$  8.01 (dd,  $J = 7.8, 1.5$  Hz, 1H), 7.69 (d,  $J = 9.1$  Hz, 1H), 7.54 (td,  $J = 7.6, 1.5$  Hz, 1H), 7.33 (td,  $J = 7.5, 1.2$  Hz, 1H), 6.89 (d,  $J = 8.7$  Hz, 2H), 6.56 (d,  $J = 8.6$  Hz, 2H), 5.88 (d,  $J = 1.7$  Hz, 1H), 4.14 (qd,  $J = 7.1, 3.1$  Hz, 2H), 3.65 (s, 3H), 3.39 (dd,  $J = 83.4, 13.4$  Hz, 2H), 1.71 – 1.65 (m, 1H), 1.16 (t,  $J = 7.1$  Hz, 3H), 0.84 (m, 2H), 0.66 – 0.60 (m, 1H), 0.29 – 0.24 (m, 1H).

**$^{13}\text{C}$  NMR** (101 MHz, Chloroform-*d*)  $\delta$  196.8, 170.3, 158.2, 138.7, 135.9, 134.4, 131.2, 128.9, 127.8, 127.7, 127.3, 126.9, 124.7, 112.9, 61.8, 61.3, 55.1, 41.8, 13.9, 13.2, 5.7, 4.6.

**HRMS** (ESI) Calculated for  $\text{C}_{24}\text{H}_{24}\text{O}_4$  ( $[\text{M}] + \text{Na}^+$ ) = 399.1567, Found 399.1572.

**IR** (neat) 3744, 3004, 2836, 2349, 2055, 1989, 1738, 1675, 1594, 1448, 1387, 1275, 1179, 1036, 934, 844, 763, 750, 561  $\text{cm}^{-1}$ .

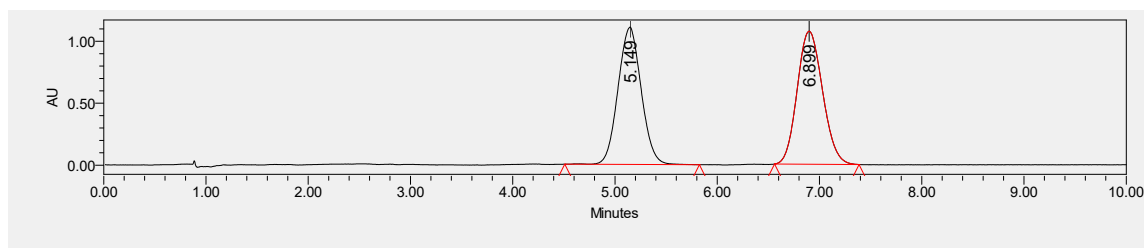

|   | Retention Time | Area     | % Area |
|---|----------------|----------|--------|
| 1 | 5.149          | 17418892 | 48.53  |
| 2 | 6.899          | 18472915 | 51.47  |

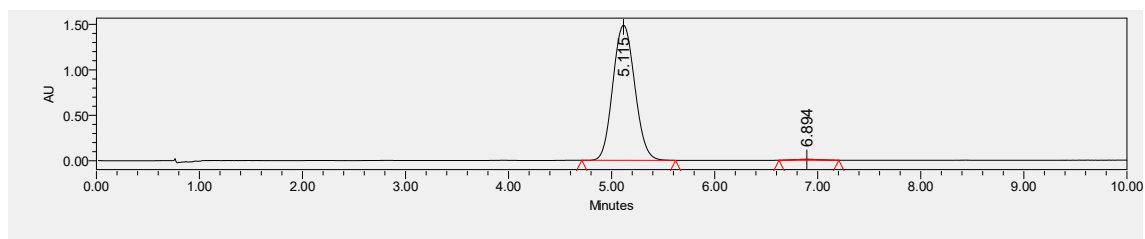

|   | Retention Time | Area     | % Area |
|---|----------------|----------|--------|
| 1 | 5.115          | 21896347 | 99.18  |
| 2 | 6.894          | 180491   | 0.82   |

**ethyl (S)-2-(4-methoxybenzyl)-1-oxo-4-(3-phenylprop-2-yn-1-yl)-1,2-dihydronaphthalene-2-carboxylate (B17)**

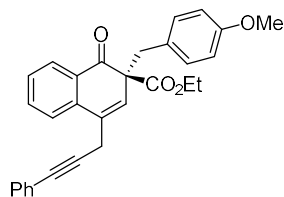

**Result:** colorless oil, 80% yield, 98% *ee*;  $[\alpha]^{25.4} = -36.4$  ( $c = 0.68$  in  $\text{CH}_2\text{Cl}_2$ ,  $\lambda = 589$  nm); SFC (Daicel chiralcel OZ-3,  $\text{CO}_2/\text{MeOH} = 90/10$ , flow rate = 1.5 mL/min,  $\lambda = 254$  nm),  $t_1 = 12.76$  min,  $t_2 = 16.68$  min.

**$^1\text{H}$  NMR** (400 MHz, Chloroform-*d*)  $\delta$  8.04 (dd,  $J = 7.7, 1.5$  Hz, 1H), 7.58 – 7.53 (m, 1H), 7.42 (m, 2H), 7.38 – 7.30 (m, 5H), 7.03 (d,  $J = 8.6$  Hz, 2H), 6.57 (d,  $J = 8.6$  Hz, 2H), 6.38 (s, 1H), 4.17 (m, 2H), 3.61 (s, 2H), 3.58 (s, 3H), 3.53 – 3.36 (m, 2H), 1.17 (t,  $J = 7.1$  Hz, 3H).

**$^{13}\text{C}$  NMR** (101 MHz, Chloroform-*d*)  $\delta$  196.3, 169.8, 158.2, 137.0, 134.5, 131.6, 131.4, 130.0, 129.9, 129.1, 128.3, 128.2, 128.1, 127.4, 127.1, 123.7, 123.3, 113.0, 85.5, 84.3, 61.9, 61.8, 54.9, 41.7, 23.5, 13.9.

**HRMS** (ESI) Calculated for  $\text{C}_{30}\text{H}_{26}\text{O}_4$  ( $[\text{M}] + \text{Na}^+$ ) = 473.1723, Found 473.1725.

**IR** (neat) 2933, 1738, 1677, 1512, 1444, 1369, 1294, 1209, 1180, 1036, 938, 824, 758, 533  $\text{cm}^{-1}$ .

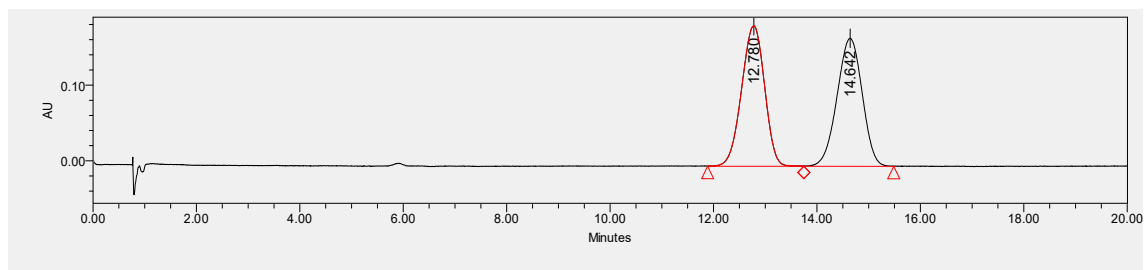

|   | Retention Time | Area    | % Area |
|---|----------------|---------|--------|
| 1 | 12.780         | 5730358 | 50.08  |
| 2 | 14.642         | 5711640 | 49.92  |

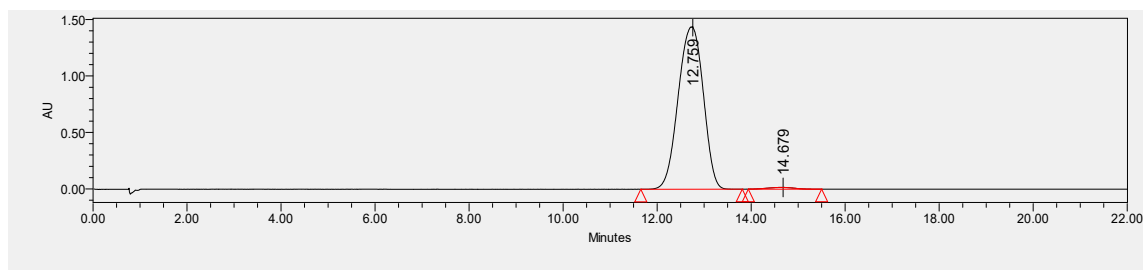

|   | Retention Time | Area     | % Area |
|---|----------------|----------|--------|
| 1 | 12.759         | 53190753 | 98.87  |
| 2 | 14.679         | 608007   | 1.13   |

**Ethyl (S)-2-(4-methoxybenzyl)-6-methyl-1-oxo-4-phenyl-1,2-dihydronaphthalene-2-carboxylate (B18)**

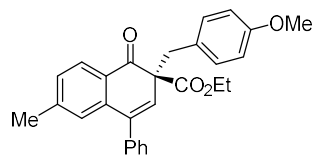

**Result:** colorless oil, 76% yield, 99% *ee*;  $[\alpha]^{26.2} = -60.5$  ( $c = 0.75$  in  $\text{CH}_2\text{Cl}_2$ ,  $\lambda = 589$  nm); SFC (Daicel chiralcel OZ-3,  $\text{CO}_2/\text{MeOH} = 90/10$ , flow rate = 1.5 mL/min,  $\lambda = 254$  nm),  $t_1 = 8.06$  min,  $t_2 = 9.31$  min.

**$^1\text{H NMR}$**  (400 MHz, Chloroform-*d*)  $\delta$  7.98 (dd,  $J = 8.0$  Hz, 1H), 7.48 – 7.39 (m, 3H), 7.25 – 7.19 (m, 2H), 7.13 (d,  $J = 7.4$  Hz, 1H), 7.03 (d,  $J = 8.6$  Hz, 2H), 6.74 (s, 1H), 6.64 (d,  $J = 8.6$  Hz, 2H), 6.01 (s, 1H), 4.18 (qd,  $J = 7.1, 1.3$  Hz, 2H), 3.69 (s, 3H), 3.49 (dd,  $J = 92.9, 13.4$  Hz, 2H), 2.24 (s, 3H), 1.20 (t,  $J = 7.1$  Hz, 3H).

**$^{13}\text{C NMR}$**  (101 MHz, Chloroform-*d*)  $\delta$  196.0, 170.0, 158.3, 145.3, 139.0, 138.3, 137.9, 131.3, 131.1, 129.0, 128.9, 128.4, 127.7, 127.5, 127.4, 127.2, 127.1, 113.0, 61.9, 61.8, 55.1, 41.8, 21.9, 14.0.

**HRMS** (ESI) Calculated for  $\text{C}_{28}\text{H}_{26}\text{O}_4$  ( $[\text{M}] + \text{Na}^+$ ) = 449.1723, Found 449.1726.

**IR** (neat) 3746, 3032, 2980, 2835, 2054, 1996, 1738, 1673, 1599, 1463, 1353, 1289, 1179, 1036, 958, 860, 761, 676, 565  $\text{cm}^{-1}$ .

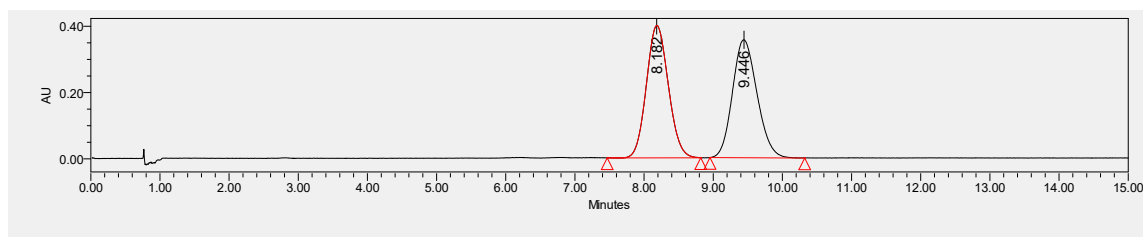

|   | Retention Time | Area    | % Area |
|---|----------------|---------|--------|
| 1 | 8.182          | 8784809 | 50.07  |
| 2 | 9.446          | 8761395 | 49.93  |

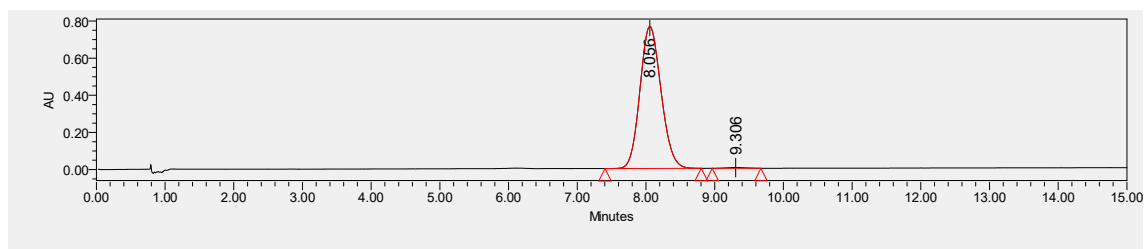

|   | Retention Time | Area     | % Area |
|---|----------------|----------|--------|
| 1 | 8.056          | 16282799 | 99.46  |
| 2 | 9.306          | 88313    | 0.54   |

### Ethyl (S)-2-(4-methoxybenzyl)-1-oxo-4,6-diphenyl-1,2-dihydronaphthalene-2-carboxylate (B19)

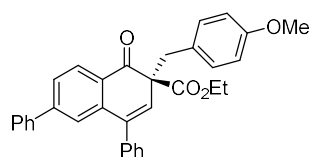

**Result:** colorless oil, 93% yield, 98% *ee*;  $[\alpha]^{26.8} = -55.8$  ( $c = 0.88$  in  $\text{CH}_2\text{Cl}_2$ ,  $\lambda = 589$  nm); SFC (Daicel chiralcel OD-3,  $\text{CO}_2/\text{MeOH} = 90/10$ , flow rate = 1.5 mL/min,  $\lambda = 254$  nm),  $t_1 = 8.84$  min,  $t_2 = 9.67$  min.

**$^1\text{H}$  NMR** (400 MHz, Chloroform-*d*)  $\delta$  8.14 (d,  $J = 8.0$  Hz, 1H), 7.54 (dd,  $J = 8.1, 1.8$  Hz, 1H), 7.47 – 7.32 (m, 8H), 7.30 – 7.25 (m, 2H), 7.18 (d,  $J = 1.8$  Hz, 1H), 7.06 (d,  $J = 8.7$  Hz, 2H), 6.65 (d,  $J = 8.7$  Hz, 2H), 6.08 (s, 1H), 4.20 (q,  $J = 7.1$  Hz, 2H), 3.66 (s, 4H), 3.41 (d,  $J = 13.5$  Hz, 1H), 1.22 (t,  $J = 7.1$  Hz, 3H).

**$^{13}\text{C}$  NMR** (101 MHz, Chloroform-*d*)  $\delta$  196.0, 169.9, 158.4, 146.9, 139.7, 138.8, 138.4, 138.3, 131.4, 131.3, 128.8, 128.5, 128.3, 128.0, 128.0, 127.9, 127.3, 127.2, 126.8, 125.4, 113.1, 61.99, 55.1, 41.8, 14.0.

**HRMS** (ESI) Calculated for  $\text{C}_{33}\text{H}_{28}\text{O}_4$  ( $[\text{M}] + \text{Na}^+$ ) = 511.1880, Found 511.1872.

**IR** (neat) 3747, 3058, 2989, 2834, 2343, 2055, 1992, 1739, 1674, 1595, 1443, 1275, 1179, 1036, 944, 849, 763, 659  $\text{cm}^{-1}$ .

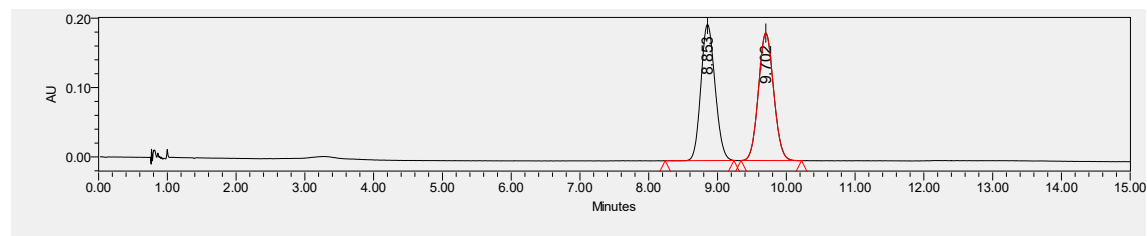

|   | Retention Time | Area    | % Area |
|---|----------------|---------|--------|
| 1 | 8.853          | 2814838 | 49.95  |
| 2 | 9.702          | 2820988 | 50.05  |

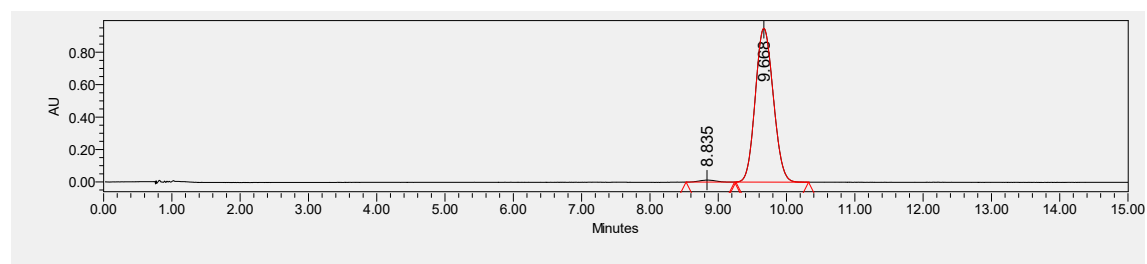

|   | Retention Time | Area     | % Area |
|---|----------------|----------|--------|
| 1 | 8.835          | 206828   | 1.18   |
| 2 | 9.668          | 17316018 | 98.82  |

**Ethyl (S)-6-methoxy-2-(4-methoxybenzyl)-1-oxo-4-phenyl-1,2-dihydronaphthalene-2-carboxylate (B20)**

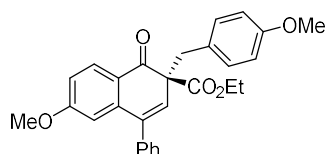

**Result:** colorless oil, 70% yield, 99% *ee*;  $[\alpha]^{26.9} = -63.5$  ( $c = 0.65$  in  $\text{CH}_2\text{Cl}_2$ ,  $\lambda = 589$  nm); SFC (Daicel chiralcel OZ-3,  $\text{CO}_2/\text{MeOH} = 90/10$ , flow rate = 1.5 mL/min,  $\lambda = 254$  nm),  $t_1 = 8.04$  min,  $t_2 = 9.31$  min.

**$^1\text{H NMR}$**  (400 MHz, Chloroform-*d*)  $\delta$  7.98 (dd,  $J = 7.9$  Hz, 1H), 7.46 – 7.39 (m, 3H), 7.22 (dd,  $J = 7.6$ , 1.9 Hz, 2H), 7.13 (d,  $J = 7.9$  Hz, 1H), 7.03 (d,  $J = 8.7$  Hz, 2H), 6.74 (s, 1H), 6.64 (d,  $J = 8.7$  Hz, 2H), 6.01 (s, 1H), 4.18 (qd,  $J = 7.1$ , 1.3 Hz, 2H), 3.69 (s, 3H), 3.49 (dd,  $J = 92.9$ , 13.4 Hz, 2H), 2.24 (s, 3H), 1.20 (t,  $J = 7.1$  Hz, 3H).

**$^{13}\text{C NMR}$**  (101 MHz, Chloroform-*d*)  $\delta$  196.0, 170.0, 158.3, 145.3, 139.0, 138.3, 137.9, 131.3, 131.1, 129.0, 128.9, 128.4, 127.7, 127.5, 127.4, 127.2, 127.1, 113.0, 61.9, 61.8, 55.1, 41.8, 21.9, 14.0.

**HRMS** (ESI) Calculated for  $\text{C}_{28}\text{H}_{26}\text{O}_5$  ( $[\text{M}] + \text{Na}^+$ ) = 465.1672, Found 465.1682.

**IR** (neat) 3746, 2987, 2835, 2349, 2054, 1994, 1738, 1673, 1599, 1443, 1276, 1179, 1036, 958, 899, 763, 649, 565  $\text{cm}^{-1}$ .

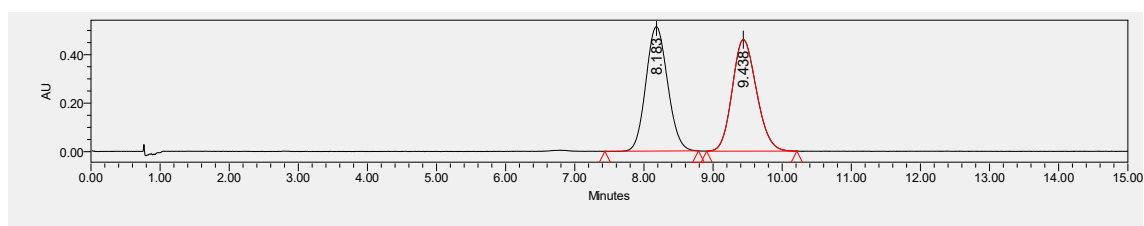

|   | Retention Time | Area     | % Area |
|---|----------------|----------|--------|
| 1 | 8.183          | 11181790 | 49.98  |
| 2 | 9.438          | 11188705 | 50.02  |

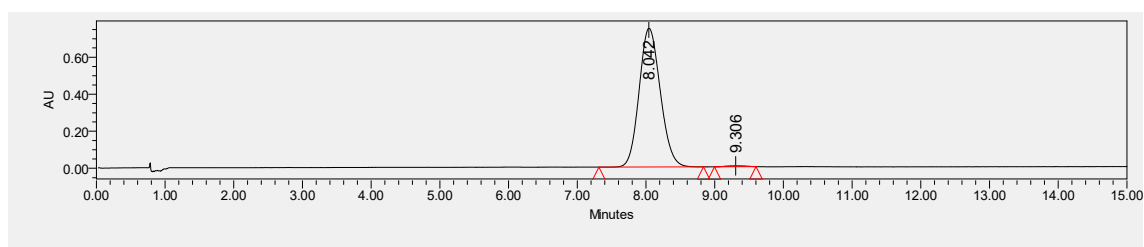

|   | Retention Time | Area     | % Area |
|---|----------------|----------|--------|
| 1 | 8.042          | 16033763 | 99.47  |
| 2 | 9.306          | 85292    | 0.53   |

**Ethyl (S)-6-fluoro-2-(4-methoxybenzyl)-1-oxo-4-phenyl-1,2-dihydronaphthalene-2-carboxylate (B21)**

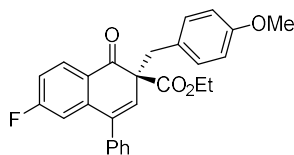

**Result:** colorless oil, 84% yield, 98% *ee*;  $[\alpha]^{26.0} = -57.8$  ( $c = 0.85$  in  $\text{CH}_2\text{Cl}_2$ ,  $\lambda = 589$  nm); SFC (Daicel chiralcel OZ-3,  $\text{CO}_2/\text{MeOH} = 90/10$ , flow rate = 1.5 mL/min,  $\lambda = 254$  nm),  $t_1 = 4.45$  min,  $t_2 = 4.95$  min.

**$^1\text{H NMR}$**  (400 MHz, Chloroform-*d*)  $\delta$  8.09 (dd,  $J = 8.7, 6.0$  Hz, 1H), 7.46 – 7.40 (m, 3H), 7.21 (dd,  $J = 7.4, 2.1$  Hz, 2H), 7.03 – 6.95 (m, 3H), 6.66 – 6.60 (m, 3H), 6.11 (s, 1H), 4.20 (q,  $J = 7.1$  Hz, 2H), 3.69 (s, 3H), 3.50 (dd,  $J = 100.0, 13.5$  Hz, 2H), 1.21 (t,  $J = 7.1$  Hz, 3H).

**$^{13}\text{C NMR}$**  (101 MHz, Chloroform-*d*)  $\delta$  194.9, 169.6, 167.8, 165.3, 158.4, 141.0 (d,  $J = 9.4$  Hz), 138.1, 137.61 (d,  $J = 2.6$  Hz), 132.4, 131.3, 131.26, 130.4 (d,  $J = 9.8$  Hz), 128.7, 128.6, 128.1, 127.0, 125.9 (d,  $J = 2.8$  Hz), 115.36 (d,  $J = 22.4$  Hz), 113.51 (d,  $J = 23.9$  Hz), 113.1, 62.1, 61.9, 55.1, 41.9, 14.0.

**$^{19}\text{F NMR}$**  (377 MHz, Chloroform-*d*)  $\delta$  -102.14.

**HRMS** (ESI) Calculated for  $\text{C}_{27}\text{H}_{23}\text{FO}_4$  ( $[\text{M}] + \text{Na}^+$ ) = 453.1473, Found 453.1476.

**IR** (neat) 3745, 2987, 2836, 2349, 2055, 1989, 1741, 1678, 1573, 1443, 1389, 1275, 1179, 1035, 970, 881, 751, 658, 564  $\text{cm}^{-1}$ .

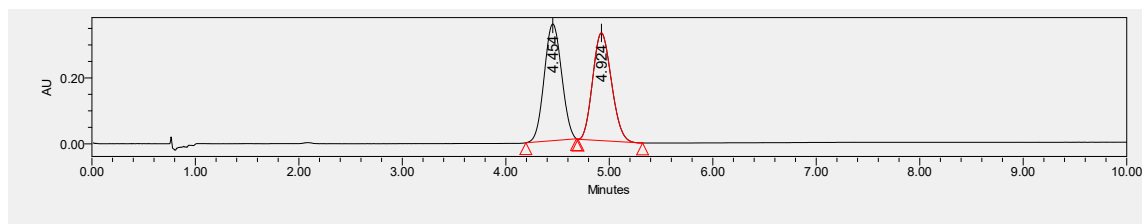

|   | Retention Time | Area    | % Area |
|---|----------------|---------|--------|
| 1 | 4.454          | 4126456 | 50.15  |
| 2 | 4.924          | 4101395 | 49.85  |

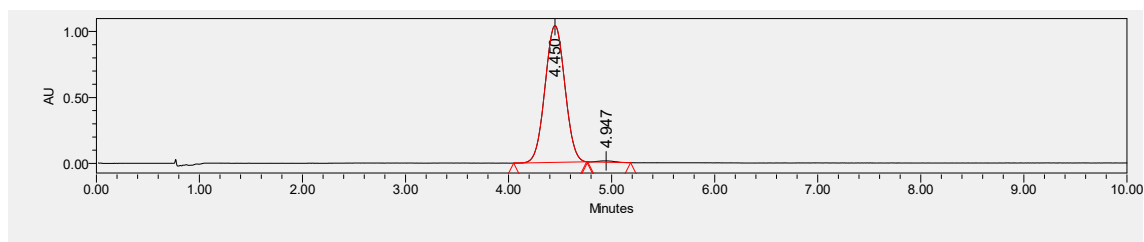

|   | Retention Time | Area     | % Area |
|---|----------------|----------|--------|
| 1 | 4.450          | 13824293 | 99.17  |
| 2 | 4.947          | 115972   | 0.83   |

**Ethyl (S)-6-chloro-2-(4-methoxybenzyl)-1-oxo-4-phenyl-1,2-dihydronaphthalene-2-carboxylate (B22)**

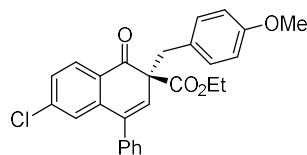

**Result:** colorless oil, 75% yield, 96% *ee*;  $[\alpha]^{26.4} = -63.9$  ( $c = 0.62$  in  $\text{CH}_2\text{Cl}_2$ ,  $\lambda = 589$  nm); SFC (Daicel chiralcel OD-3,  $\text{CO}_2/\text{MeOH} = 95/5$ , flow rate = 1.5 mL/min,  $\lambda = 254$  nm),  $t_1 = 6.85$  min,  $t_2 = 7.58$  min.

**$^1\text{H}$  NMR** (400 MHz, Chloroform-*d*)  $\delta$  8.00 (d,  $J = 8.4$  Hz, 1H), 7.46 – 7.41 (m, 3H), 7.28 (dd,  $J = 8.4, 2.1$  Hz, 1H), 7.20 (m, 2H), 7.02 – 6.98 (m, 2H), 6.92 (d,  $J = 2.1$  Hz, 1H), 6.64 (d,  $J = 8.7$  Hz, 2H), 6.09 (s, 1H), 4.19 (q,  $J = 6.9$  Hz, 2H), 3.69 (s, 3H), 3.50 (dd,  $J = 101.9, 13.4$  Hz, 2H), 1.21 (t,  $J = 7.1$  Hz, 3H).

**$^{13}\text{C}$  NMR** (101 MHz, Chloroform-*d*)  $\delta$  195.4, 169.5, 158.4, 141.0, 138.0, 137.5, 132.4, 131.2, 128.9, 128.7, 128.7, 128.3, 128.1, 127.5, 126.9, 126.7, 113.1, 62.1, 62.0, 55.1, 41.9, 14.0.

**HRMS** (ESI) Calculated for  $\text{C}_{27}\text{H}_{23}\text{ClO}_4$  ( $[\text{M}] + \text{Na}^+$ ) = 469.1177, Found 469.1171.

**IR** (neat) 3746, 3060, 2981, 2835, 2349, 2056, 1987, 1741, 1678, 1642, 1585, 1442, 1179, 1036, 939, 894, 761, 657  $\text{cm}^{-1}$ .

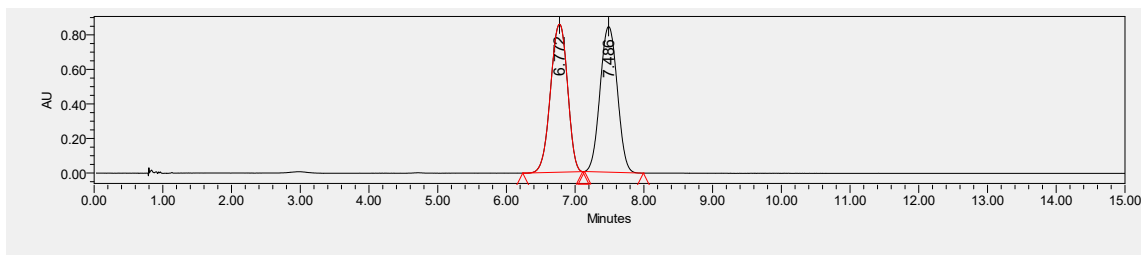

|   | Retention Time | Area     | % Area |
|---|----------------|----------|--------|
| 1 | 6.772          | 14716661 | 50.07  |
| 2 | 7.486          | 14674748 | 49.93  |

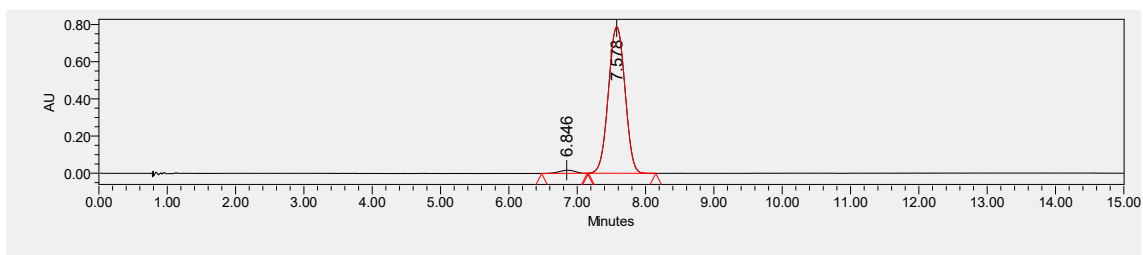

|   | Retention Time | Area     | % Area |
|---|----------------|----------|--------|
| 1 | 6.846          | 266777   | 1.97   |
| 2 | 7.578          | 13254145 | 98.03  |

**Ethyl (S)-6-bromo-2-(4-methoxybenzyl)-1-oxo-4-phenyl-1,2-dihydronaphthalene-2-carboxylate (B23)**

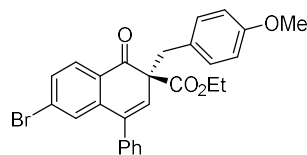

**Result:** colorless oil, 71% yield, 96% *ee*;  $[\alpha]^{26.9} = -46.5$  ( $c = 0.78$  in  $\text{CH}_2\text{Cl}_2$ ,  $\lambda = 589$  nm); SFC (Daicel chiralcel OD-3,  $\text{CO}_2/\text{MeOH} = 95/5$ , flow rate = 1.5 mL/min,  $\lambda = 254$  nm),  $t_1 = 8.36$  min,  $t_2 = 9.17$  min.

**$^1\text{H NMR}$**  (400 MHz, Chloroform-*d*)  $\delta$  7.91 (d,  $J = 8.3$  Hz, 1H), 7.44 (m, 4H), 7.23 – 7.17 (m, 2H), 7.09 (d,  $J = 2.0$  Hz, 1H), 7.00 (d,  $J = 8.6$  Hz, 2H), 6.64 (d,  $J = 8.7$  Hz, 2H), 6.09 (s, 1H), 4.19 (q,  $J = 6.9$  Hz, 2H), 3.69 (s, 3H), 3.50 (dd,  $J = 101.8, 13.5$  Hz, 2H), 1.21 (t,  $J = 7.1$  Hz, 3H).

**$^{13}\text{C NMR}$**  (101 MHz, Chloroform-*d*)  $\delta$  195.6, 169.5, 158.4, 139.5, 138.0, 137.4, 132.5, 131.3, 131.2, 120.0, 129.6, 128.9, 128.7, 128.7, 128.1, 127.9, 126.9, 113.1, 62.1, 62.0, 55.1, 41.9, 14.0.

**HRMS** (ESI) Calculated for  $\text{C}_{27}\text{H}_{23}^{79}\text{BrO}_4$  ( $[\text{M}] + \text{Na}^+$ ) = 513.0672, Found 513.0671.

**HRMS** (ESI) Calculated for  $\text{C}_{27}\text{H}_{23}^{81}\text{BrO}_4$  ( $[\text{M}] + \text{Na}^+$ ) = 515.0651, Found 515.0651.

**IR** (neat) 3746, 2988, 2835, 2349, 2054, 1995, 1741, 1678, 1580, 1275, 1179, 1036, 939, 895, 763, 659, 559  $\text{cm}^{-1}$ .

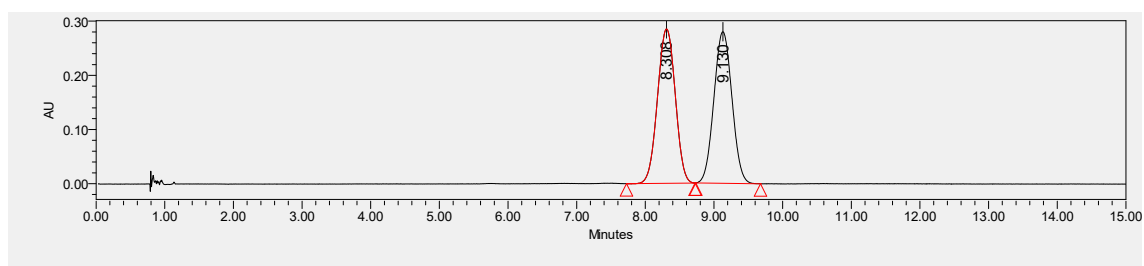

|   | Retention Time | Area    | % Area |
|---|----------------|---------|--------|
| 1 | 8.308          | 5109170 | 50.01  |
| 2 | 9.130          | 5107364 | 49.99  |

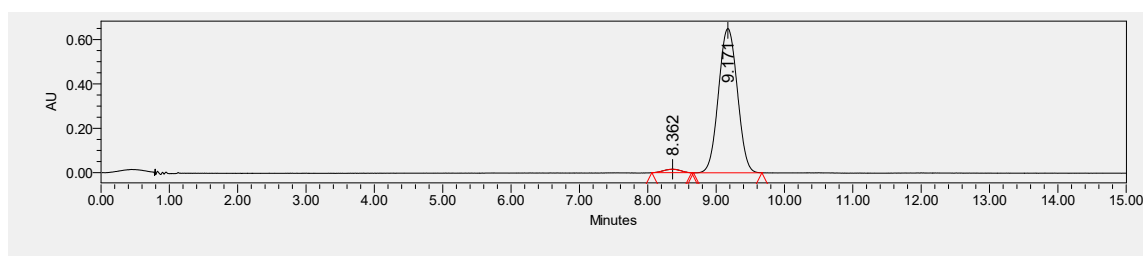

|   | Retention Time | Area     | % Area |
|---|----------------|----------|--------|
| 1 | 8.362          | 268502   | 2.12   |
| 2 | 9.171          | 12422845 | 97.88  |



**Ethyl (S)-2-(4-methoxybenzyl)-1-oxo-4-phenyl-6-(trifluoromethoxy)-1,2-dihydronaphthalene-2-carboxylate (B24)**

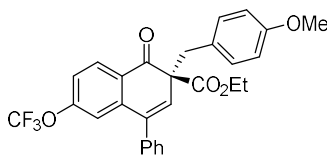

**Result:** colorless oil, 77% yield, 93% *ee*;  $[\alpha]^{25.9} = -58.0$  ( $c = 0.71$  in  $\text{CH}_2\text{Cl}_2$ ,  $\lambda = 589$  nm); SFC (Daicel chiralcel OD-3,  $\text{CO}_2/\text{iPrOH} = 95/5$ , flow rate = 1.0 mL/min,  $\lambda = 254$  nm),  $t_1 = 5.94$  min,  $t_2 = 6.88$  min.

**$^1\text{H NMR}$**  (400 MHz, Chloroform-*d*)  $\delta$  8.10 (d,  $J = 8.6$  Hz, 1H), 7.47 – 7.41 (m, 3H), 7.24 – 7.20 (m, 2H), 7.13 (m, 1H), 7.01 (d,  $J = 8.7$  Hz, 2H), 6.79 – 6.73 (s, 1H), 6.64 (d,  $J = 8.6$  Hz, 2H), 6.13 (s, 1H), 4.20 (q,  $J = 7.1$  Hz, 2H), 3.68 (s, 3H), 3.50 (dd,  $J = 97.0, 13.5$  Hz, 2H), 1.22 (t,  $J = 7.1$  Hz, 3H).

**$^{13}\text{C NMR}$**  (101 MHz, Chloroform-*d*)  $\delta$  195.0, 169.5, 158.5, 153.5, 140.3, 137.9, 137.5, 132.5, 131.3, 129.6, 128.7, 128.7, 128.2, 127.4, 126.8, 119.2, 118.3, 113.1, 62.2, 62.1, 55.1, 41.9, 14.0.

**HRMS** (ESI) Calculated for  $\text{C}_{28}\text{H}_{23}\text{F}_3\text{O}_5$  ( $[\text{M}] + \text{Na}^+$ ) = 519.1390, Found 519.1394.

**IR** (neat) 3747, 2982, 2837, 2348, 1742, 1681, 1644, 1483, 1443, 1177, 1037, 942, 895, 761, 621  $\text{cm}^{-1}$

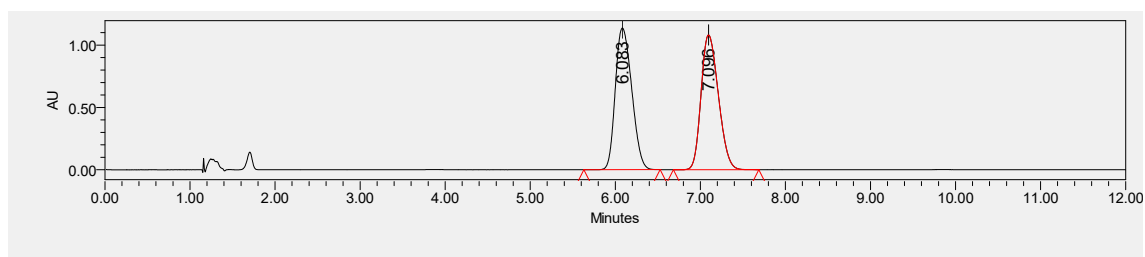

|   | Retention Time | Area     | % Area |
|---|----------------|----------|--------|
| 1 | 6.083          | 15254582 | 50.03  |
| 2 | 7.096          | 15234392 | 49.97  |

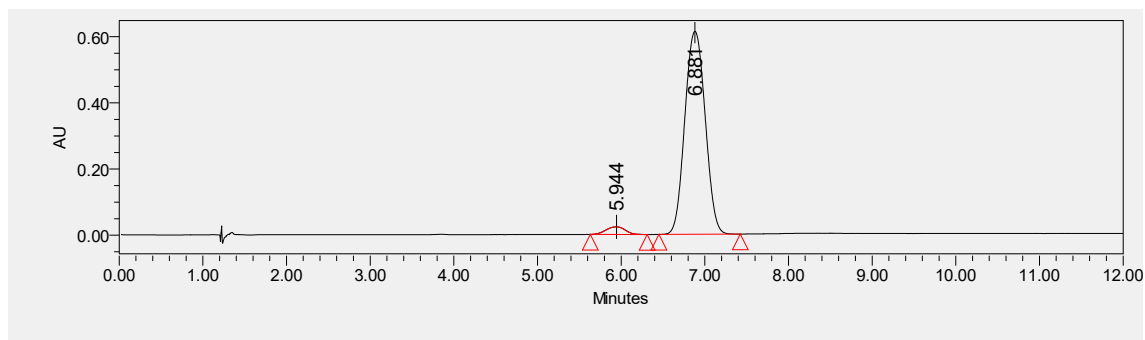

|   | Retention Time | Area     | % Area |
|---|----------------|----------|--------|
| 1 | 5.944          | 369379   | 3.44   |
| 2 | 6.881          | 10355235 | 96.56  |

**Ethyl (S)-8-fluoro-2-(4-methoxybenzyl)-1-oxo-4-phenyl-1,2-dihydronaphthalene-2-carboxylate (B25)**

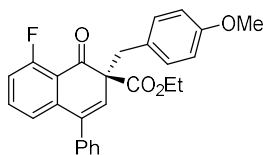

**Result:** colorless oil, 85% yield, 98% *ee*;  $[\alpha]^{26.4} = -99.0$  ( $c = 0.78$  in  $\text{CH}_2\text{Cl}_2$ ,  $\lambda = 589$  nm); SFC (Daicel chiralcel IE-3,  $\text{CO}_2/\text{MeOH} = 90/10$ , flow rate = 1.5 mL/min,  $\lambda = 254$  nm),  $t_1 = 8.88$  min,  $t_2 = 9.89$  min.

**$^1\text{H NMR}$**  (400 MHz, Chloroform-*d*)  $\delta$  7.46 – 7.37 (m, 3H), 7.32 (td,  $J = 8.1, 5.2$  Hz, 1H), 7.25 – 7.19 (m, 2H), 7.07 (d,  $J = 8.6$  Hz, 2H), 6.97 (td,  $J = 10.8, 8.3, 1.0$  Hz, 1H), 6.72 (d,  $J = 7.9$  Hz, 1H), 6.66 (d,  $J = 8.7$  Hz, 2H), 6.05 (s, 1H), 4.21 (qd,  $J = 7.2, 2.3$  Hz, 2H), 3.69 (s, 3H), 3.48 (dd,  $J = 93.0, 13.5$  Hz, 2H), 1.22 (t,  $J = 7.1$  Hz, 3H).

**$^{13}\text{C NMR}$**  (101 MHz, Chloroform-*d*)  $\delta$  194.2, 169.7, 163.0, 160.4, 158.4, 140.2, 138.6, 138.0, 135.3, 135.2, 131.4, 131.3, 128.8, 128.5, 128.0, 127.1, 122.8, 122.7, 116.7, 116.4, 113.1, 63.0, 62.0, 55.1, 41.3, 14.0.

**$^{19}\text{F NMR}$**  (377 MHz, Chloroform-*d*)  $\delta$  -111.50.

**HRMS** (ESI) Calculated for  $\text{C}_{27}\text{H}_{23}\text{FO}_4$  ( $[\text{M}] + \text{Na}^+$ ) = 453.1473, Found 453.1471.

**IR** (neat) 3747, 2988, 2836, 2349, 2054, 1986, 1740, 1681, 1642, 1569, 1444, 1389, 1276, 1179, 1037, 922, 897, 798, 659, 559  $\text{cm}^{-1}$ .

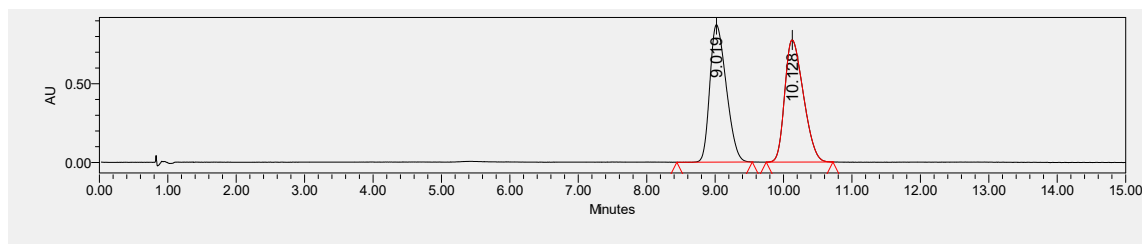

|   | Retention Time | Area     | % Area |
|---|----------------|----------|--------|
| 1 | 9.019          | 14544961 | 49.81  |
| 2 | 10.128         | 14657180 | 50.19  |

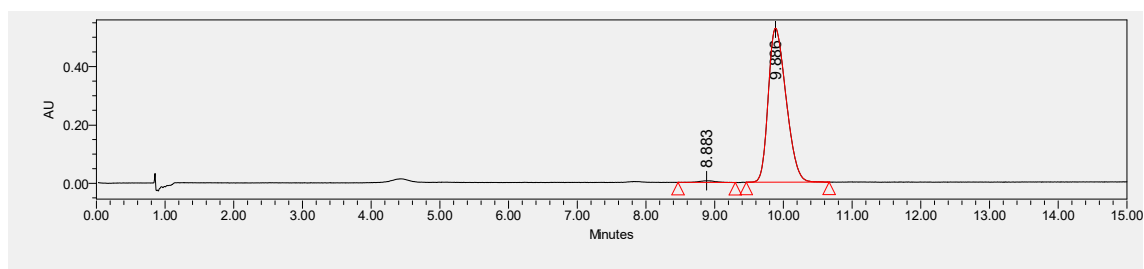

|   | Retention Time | Area    | % Area |
|---|----------------|---------|--------|
| 1 | 8.883          | 89978   | 0.94   |
| 2 | 9.886          | 9483498 | 99.06  |

**Ethyl (S)-2-(4-methoxybenzyl)-8-methyl-1-oxo-4-phenyl-1,2-dihydronaphthalene-2-carboxylate (B26)**

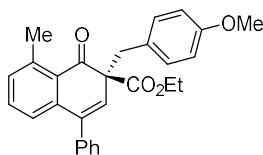

**Result:** colorless oil, 84% yield, 92% *ee*;  $[\alpha]_{26.0}^{26.0} = -140.0$  ( $c = 0.69$  in  $\text{CH}_2\text{Cl}_2$ ,  $\lambda = 589$  nm); SFC (Daicel chiralcel OD-3,  $\text{CO}_2/\text{iPrOH} = 95/5$ , flow rate = 1.0 mL/min,  $\lambda = 254$  nm),  $t_1 = 15.09$  min,  $t_2 = 16.01$  min.

**$^1\text{H NMR}$**  (400 MHz, Chloroform-*d*)  $\delta$  7.44 – 7.34 (m, 3H), 7.27 – 7.20 (m, 3H), 7.11 (d,  $J = 7.5$  Hz, 1H), 7.06 (d,  $J = 8.6$  Hz, 2H), 6.81 (d,  $J = 7.7$  Hz, 1H), 6.66 (d,  $J = 8.6$  Hz, 2H), 5.99 (s, 1H), 4.19 (qq,  $J = 6.8, 3.6$  Hz, 2H), 3.70 (s, 3H), 3.50 – 3.35 (m, 2H), 2.65 (s, 3H), 1.20 (t,  $J = 7.1$  Hz, 3H).

**$^{13}\text{C NMR}$**  (101 MHz, Chloroform-*d*)  $\delta$  198.4, 170.4, 158.4, 141.1, 139.4, 139.1, 138.7, 132.9, 131.9, 131.3, 129.8, 128.9, 128.4, 128.8, 127.7, 125.2, 113.1, 63.2, 61.8, 55.1, 40.9, 22.8, 14.0.

**HRMS** (ESI) Calculated for  $\text{C}_{28}\text{H}_{26}\text{BrO}_4$  ( $[\text{M}] + \text{Na}^+$ ) = 449.1723, Found 449.1725.

**IR** (neat) 3746, 3057, 2987, 2835, 2354, 2055, 1889, 1739, 1671, 1583, 1442, 1381, 1178, 1036, 975, 895, 796, 659, 599  $\text{cm}^{-1}$ .

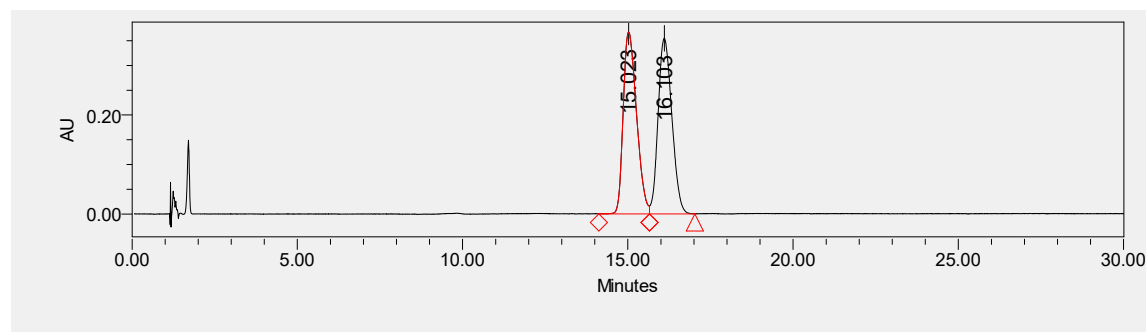

|   | Retention Time | Area     | % Area |
|---|----------------|----------|--------|
| 1 | 15.023         | 10268365 | 50.01  |
| 2 | 16.103         | 10265600 | 49.99  |

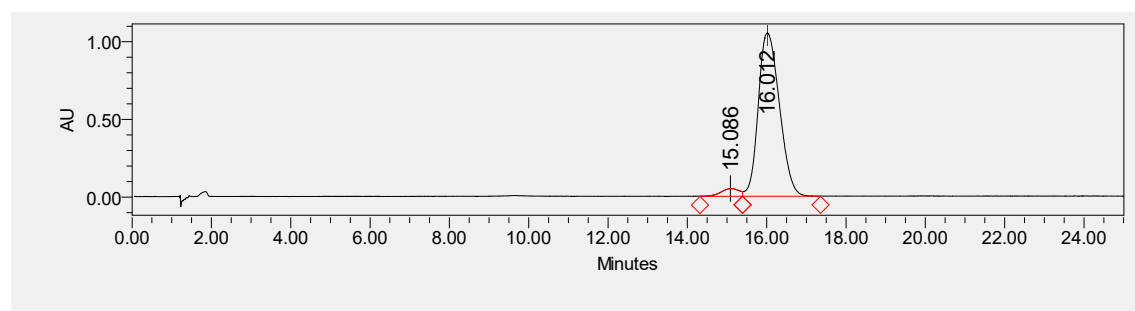

|   | Retention Time | Area     | % Area |
|---|----------------|----------|--------|
| 1 | 15.086         | 1615603  | 3.97   |
| 2 | 16.012         | 39037415 | 96.03  |

**Ethyl (S)-2-(4-methoxybenzyl)-5,7-dimethyl-1-oxo-4-phenyl-1,2-dihydronaphthalene-2-carboxylate (B27)**

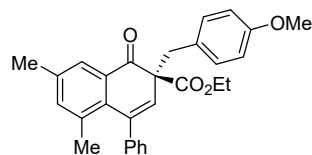

**Result:** colorless oil, 63% yield, 96% *ee*;  $[\alpha]^{25.8} = -91.7$  ( $c = 1.10$  in  $\text{CH}_2\text{Cl}_2$ ,  $\lambda = 589$  nm); SFC (Daicel chiralcel OZ-3,  $\text{CO}_2/\text{MeOH} = 90/10$ , flow rate = 1.5 mL/min,  $\lambda = 254$  nm),  $t_1 = 7.39$  min,  $t_2 = 8.54$  min.

**$^1\text{H NMR}$**  (400 MHz, Chloroform-*d*)  $\delta$  7.68 (s, 1H), 7.33 (d,  $J = 6.1$  Hz, 3H), 7.16 (m, 2H), 7.06 – 7.02 (m, 3H), 6.66 (d,  $J = 8.7$  Hz, 2H), 5.95 (s, 1H), 4.23 – 4.13 (m, 2H), 3.71 (s, 3H), 3.38 (d,  $J = 5.1$  Hz, 2H), 2.33 (s, 3H), 1.58 (s, 3H), 1.20 (t,  $J = 7.1$  Hz, 3H).

**$^{13}\text{C NMR}$**  (101 MHz, Chloroform-*d*)  $\delta$  197.6, 170.3, 158.3, 142.7, 139.1, 139.0, 137.9, 135.8, 133.4, 131.4, 130.8, 130.3, 128.4, 127.7, 127.7, 127.2, 125.9, 112.9, 62.1, 61.8, 55.1, 41.0, 22.8, 20.8, 14.0.

**HRMS** (ESI) Calculated for  $\text{C}_{29}\text{H}_{28}\text{O}_4$  ( $[\text{M}] + \text{Na}^+$ ) = 463.1880, Found 463.1880.

**IR** (neat) 3746, 2988, 2835, 2349, 2055, 1987, 1739, 1675, 1444, 1365, 1276, 1178, 1036, 915, 833, 763, 637, 561  $\text{cm}^{-1}$ .

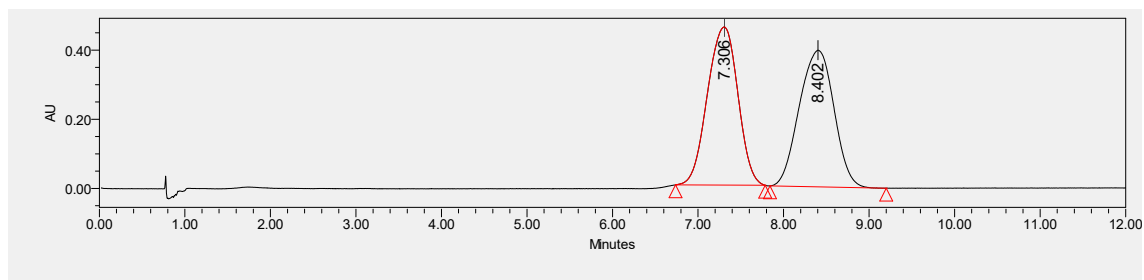

|   | Retention Time | Area     | % Area |
|---|----------------|----------|--------|
| 1 | 7.306          | 11297170 | 50.36  |
| 2 | 8.402          | 11135624 | 49.64  |

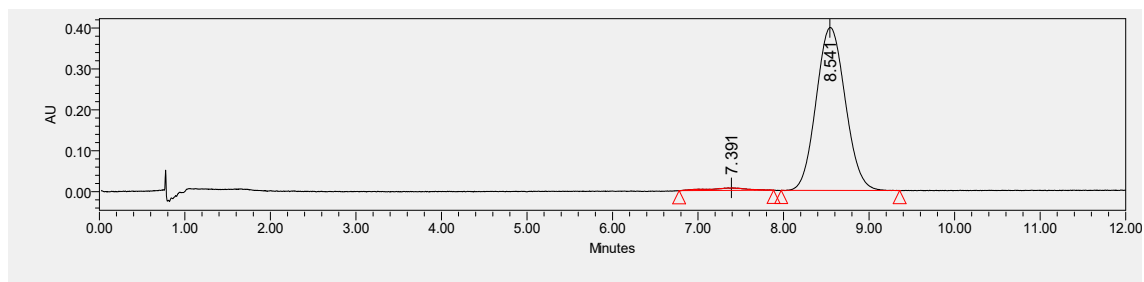

|   | Retention Time | Area    | % Area |
|---|----------------|---------|--------|
| 1 | 7.391          | 195254  | 2.03   |
| 2 | 8.541          | 9403144 | 97.97  |

**Ethyl (S)-5,7-dibromo-2-(4-methoxybenzyl)-1-oxo-4-phenyl-1,2-dihydronaphthalene-2-carboxylate (B28)**

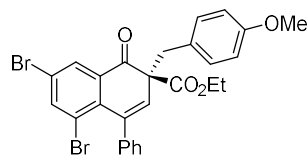

**Result:** White solid, Mp: 121-123 °C, 60% yield, 99% *ee*;  $[\alpha]_D^{26.6} = 32.7$  ( $c = 0.66$  in  $\text{CH}_2\text{Cl}_2$ ,  $\lambda = 589$  nm); SFC (Daicel chiralcel IE-3,  $\text{CO}_2/\text{MeOH} = 90/10$ , flow rate = 1.5 mL/min,  $\lambda = 254$  nm),  $t_1 = 17.96$  min,  $t_2 = 19.30$  min.

**$^1\text{H}$  NMR** (400 MHz, Chloroform-*d*)  $\delta$  8.16 (s, 1H), 7.92 (s, 1H), 7.54 (s, 1H), 7.36 (m, 3H), 7.23 (d,  $J = 7.2$  Hz, 2H), 6.64 (d,  $J = 8.7$  Hz, 2H), 6.54 (d,  $J = 8.7$  Hz, 2H), 4.51 (d,  $J = 13.3$  Hz, 1H), 4.33 – 4.28 (m, 2H), 3.68 (s, 3H), 3.59 (d,  $J = 13.3$  Hz, 1H), 1.33 (d,  $J = 7.1$  Hz, 3H).

**$^{13}\text{C}$  NMR** (101 MHz, Chloroform-*d*)  $\delta$  178.4, 163.8, 160.3, 158.5, 141.6, 141.0, 139.8, 137.0, 130.8, 129.8, 129.2, 127.8, 127.4, 126.9, 126.3, 122.4, 113.2, 61.6, 55.0, 52.8, 38.4, 14.2.

**HRMS** (ESI) Calculated for  $\text{C}_{27}\text{H}_{22}^{79}\text{Br}_2\text{O}_4$  ( $[\text{M}+\text{Na}^+]$ ) = 590.9782, Found 590.9782.

**HRMS** (ESI) Calculated for  $\text{C}_{27}\text{H}_{22}^{81}\text{Br}_2\text{O}_4$  ( $[\text{M}+\text{Na}^+]$ ) = 594.9736, Found 594.9758.

**HRMS** (ESI) Calculated for  $\text{C}_{27}\text{H}_{22}^{79}\text{Br}^{81}\text{BrO}_4$  ( $[\text{M}+\text{Na}^+]$ ) = 592.9757, Found 592.9776.

**IR** (neat) 3746, 3065, 2982, 2835, 2349, 2107, 1989, 1739, 1670, 1572, 1444, 1276, 1180, 1030, 962, 878, 752, 698, 583  $\text{cm}^{-1}$ .

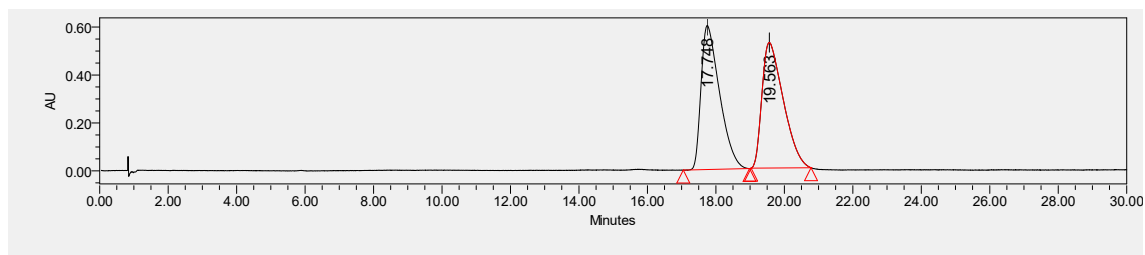

|   | Retention Time | Area     | % Area |
|---|----------------|----------|--------|
| 1 | 17.748         | 22563926 | 49.94  |
| 2 | 19.563         | 22616386 | 50.06  |

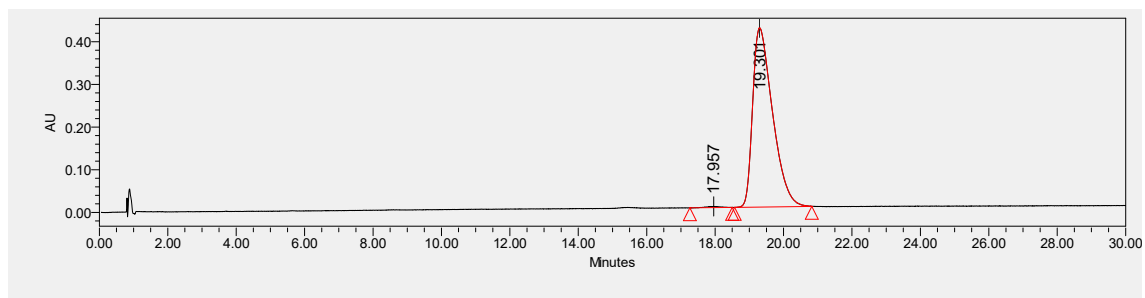

|   | Retention Time | Area     | % Area |
|---|----------------|----------|--------|
| 1 | 17.957         | 71019    | 0.42   |
| 2 | 19.301         | 16921386 | 99.58  |

**Ethyl (S)-5,7-dichloro-2-(4-methoxybenzyl)-1-oxo-4-phenyl-1,2-dihydronaphthalene-2-carboxylate (B29)**

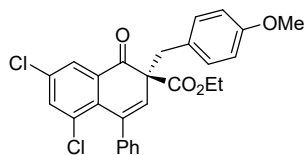

**Result:** colorless oil, 55% yield, 98% *ee*;  $[\alpha]^{26.3} = 20.3$  ( $c = 0.50$  in  $\text{CH}_2\text{Cl}_2$ ,  $\lambda = 589$  nm); SFC (Daicel chiralcel OZ-3,  $\text{CO}_2/\text{MeOH} = 90/10$ , flow rate = 1.5 mL/min,  $\lambda = 254$  nm),  $t_1 = 5.05$  min,  $t_2 = 5.73$  min.

**$^1\text{H NMR}$**  (400 MHz, Chloroform-*d*)  $\delta$  7.97 (d,  $J = 2.4$  Hz, 1H), 7.54 (d,  $J = 4.1$  Hz, 2H), 7.37 – 7.33 (m, 3H), 7.23 (d,  $J = 6.5$  Hz, 2H), 6.63 (d,  $J = 8.7$  Hz, 2H), 6.53 (s, 2H), 4.39 (d,  $J = 13.3$  Hz, 1H), 4.32 – 4.28 (m, 2H), 3.68 (s, 3H), 3.62 (d,  $J = 13.2$  Hz, 1H), 1.34 (s, 3H).

**$^{13}\text{C NMR}$**  (101 MHz, Chloroform-*d*)  $\delta$  178.5, 163.9, 160.3, 158.5, 139.8, 136.3, 134.8, 134.5, 134.4, 130.7, 129.2, 127.7, 127.2, 127.1, 126.4, 126.2, 113.3, 61.6, 55.0, 51.8, 38.7, 14.2.

**HRMS** (ESI) Calculated for  $\text{C}_{27}\text{H}_{22}\text{Cl}_2\text{O}_4$  ( $[\text{M}] + \text{Na}^+$ ) = 503.0787, Found 503.0788.

**IR** (neat) 3746, 3070, 2984, 2836, 2349, 1988, 1739, 1671, 1582, 1444, 1276, 1029, 964, 878, 762, 698, 645, 589  $\text{cm}^{-1}$ .

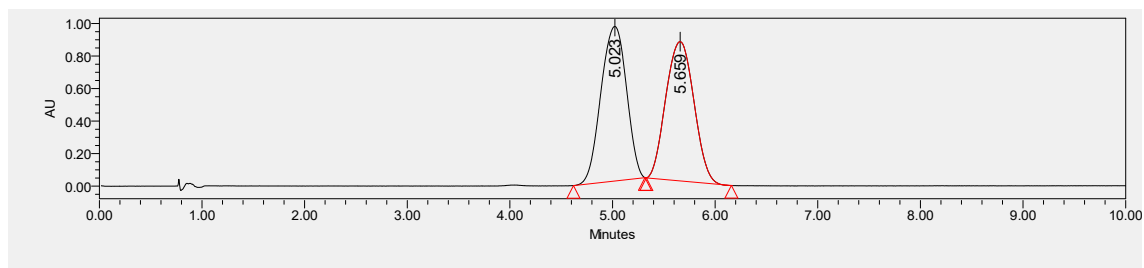

|   | Retention Time | Area     | % Area |
|---|----------------|----------|--------|
| 1 | 5.023          | 16436486 | 50.22  |
| 2 | 5.659          | 16295732 | 49.78  |

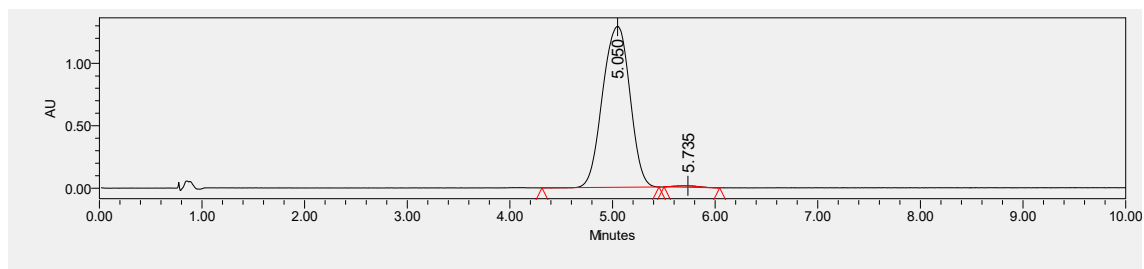

|   | Retention Time | Area     | % Area |
|---|----------------|----------|--------|
| 1 | 5.050          | 23828073 | 99.23  |
| 2 | 5.735          | 185531   | 0.77   |

**Ethyl (S)-2-(4-methylbenzyl)-1-oxo-4-phenyl-1,2-dihydronaphthalene-2-carboxylate (B30)**

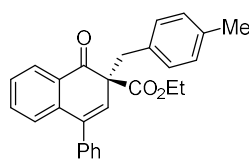

**Result:** colorless oil, 18% yield, 94% *ee*,  $[\alpha]^{26.6} = -47.4$  ( $c = 0.22$  in  $\text{CH}_2\text{Cl}_2$ ,  $\lambda = 589$  nm); SFC (Daicel chiralcel OZ-3,  $\text{CO}_2/\text{MeOH} = 90/10$ , flow rate = 1.5 mL/min,  $\lambda = 254$  nm),  $t_1 = 4.25$  min,  $t_2 = 5.54$  min.

**$^1\text{H}$  NMR** (400 MHz, Chloroform-*d*)  $\delta$  8.07 (dd,  $J = 7.6, 1.5$  Hz, 1H), 7.45 – 7.38 (m, 4H), 7.32 (m, 1H), 7.22 (m, 2H), 7.00 (d,  $J = 8.0$  Hz, 2H), 6.96 (d,  $J = 7.3$  Hz, 1H), 6.90 (d,  $J = 7.8$  Hz, 2H), 6.03 (s, 1H), 4.19 (q,  $J = 7.1$  Hz, 2H), 3.51 (dd,  $J = 80.1, 13.3$  Hz, 2H), 2.19 (s, 3H), 1.20 (t,  $J = 7.1$  Hz, 3H).

**$^{13}\text{C}$  NMR** (101 MHz, Chloroform-*d*)  $\delta$  196.4, 169.9, 138.9, 138.2, 137.9, 136.2, 134.2, 132.1, 130.8, 130.2, 129.3, 128.9, 128.4, 128.4, 128.1, 127.8, 127.3, 126.7, 62.0, 61.8, 42.1, 21.0, 14.0.

**HRMS** (ESI) Calculated for  $\text{C}_{27}\text{H}_{24}\text{O}_3$  ( $[\text{M}] + \text{Na}^+$ ) = 419.1618, Found 419.1620.

**IR** (neat) 3743, 3057, 2980, 2350, 1987, 1739, 1677, 1644, 1445, 1278, 1037, 943, 895, 751, 679, 576,  $\text{cm}^{-1}$ .

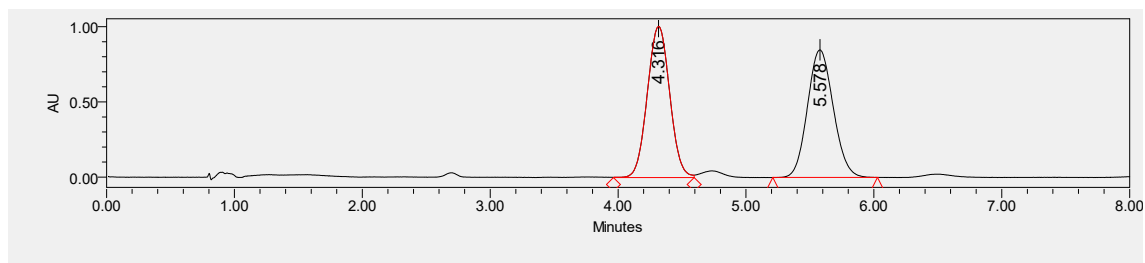

|   | Retention Time | Area     | % Area |
|---|----------------|----------|--------|
| 1 | 4.316          | 12209594 | 50.69  |
| 2 | 5.578          | 11875095 | 49.31  |

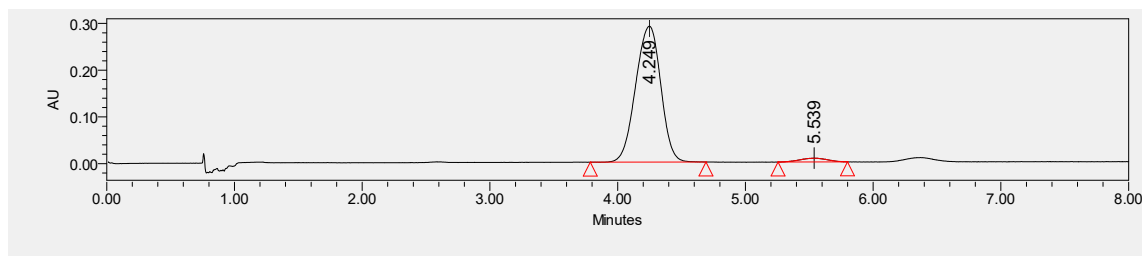

|   | Retention Time | Area    | % Area |
|---|----------------|---------|--------|
| 1 | 4.249          | 3970243 | 97.15  |
| 2 | 5.539          | 116655  | 2.85   |

### Ethyl (S)-2-(2-methoxybenzyl)-1-oxo-4-phenyl-1,2-dihydronaphthalene-2-carboxylate (B31)

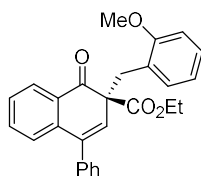

**Result:** colorless oil, 29% yield, 98% *ee*,  $[\alpha]^{17.8} = -132$  ( $c = 0.20$  in  $\text{CH}_2\text{Cl}_2$ ,  $\lambda = 589$  nm); SFC (Daicel chiralcel OZ-3,  $\text{CO}_2/\text{MeOH} = 90/10$ , flow rate = 1.5 mL/min,  $\lambda = 254$  nm),  $t_1 = 5.81$  min,  $t_2 = 7.43$  min.

**$^1\text{H}$  NMR** (400 MHz, Chloroform-*d*)  $\delta$  8.16 – 8.05 (m, 1H), 7.39 – 7.30 (m, 5H), 7.09 – 7.02 (m, 4H), 6.92 (m, 1H), 6.67 (m,  $J = 7.4, 1.1$  Hz, 1H), 6.63 (d,  $J = 8.0$  Hz, 1H), 6.01 (s, 1H), 4.20 (q,  $J = 7.1$  Hz, 2H), 3.71 – 3.62 (m, 2H), 3.47 (s, 3H), 1.21 (t,  $J = 7.1$  Hz, 3H).

**$^{13}\text{C}$  NMR** (101 MHz, Chloroform-*d*)  $\delta$  196.7, 170.4, 157.7, 139.0, 137.8, 137.2, 134.0, 131.9, 131.2, 129.6, 128.9, 128.2, 128.0, 127.8, 127.6, 127.0, 126.5, 124.2, 119.8, 109.6, 61.9, 61.6, 54.5, 36.8, 14.0.

**HRMS** (ESI) Calculated for  $\text{C}_{27}\text{H}_{24}\text{O}_4$  ( $[\text{M}] + \text{Na}^+$ ) = 435.1567, Found 435.1567.

**IR** (neat) 3746, 3064, 2937, 1739, 1679, 1449, 1443, 1359, 1290, 1246, 1112, 1031, 941, 860, 755, 570  $\text{cm}^{-1}$ .

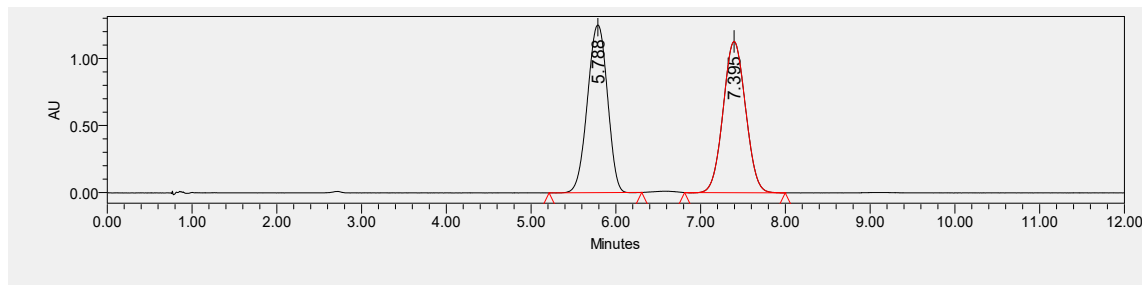

|   | Retention Time | Area     | % Area |
|---|----------------|----------|--------|
| 1 | 5.788          | 20488818 | 49.78  |
| 2 | 7.395          | 20672803 | 50.22  |

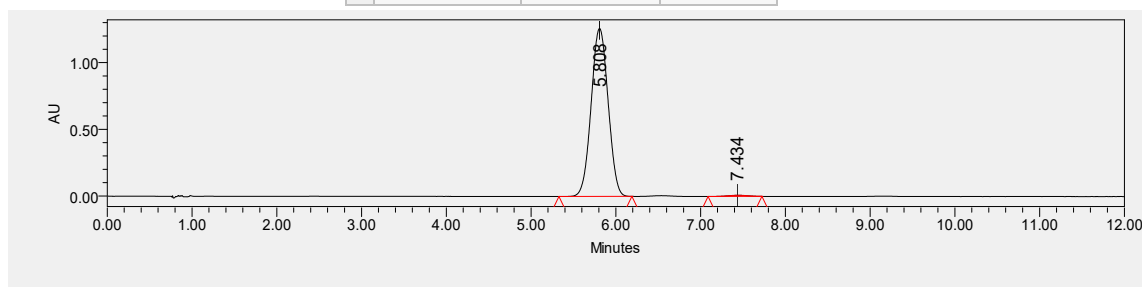

|   | Retention Time | Area     | % Area |
|---|----------------|----------|--------|
| 1 | 5.808          | 17499282 | 99.24  |
| 2 | 7.434          | 134508   | 0.76   |



**Ethyl (S)-2-(4-(methylthio)benzyl)-1-oxo-4-phenyl-1,2-dihydronaphthalene-2-carboxylate (B32)**

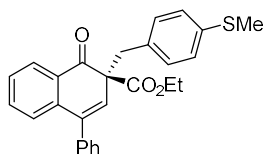

**Result:** colorless oil, 59% yield, 99% *ee*;  $[\alpha]^{26.1} = -75.3$  ( $c = 0.50$  in  $\text{CH}_2\text{Cl}_2$ ,  $\lambda = 589$  nm); SFC (Daicel chiralcel OZ-3,  $\text{CO}_2/\text{MeOH} = 90/10$ , flow rate = 1.5 mL/min,  $\lambda = 254$  nm),  $t_1 = 7.15$  min,  $t_2 = 8.35$  min.

**$^1\text{H}$  NMR** (400 MHz, Chloroform-*d*)  $\delta$  8.06 (dd,  $J = 7.7, 1.5$  Hz, 1H), 7.45 – 7.38 (m, 4H), 7.33 (td,  $J = 7.5, 1.3$  Hz, 1H), 7.22 (dd,  $J = 7.4, 2.0$  Hz, 2H), 7.05 – 6.96 (m, 5H), 6.02 (s, 1H), 4.19 (q,  $J = 7.1$  Hz, 2H), 3.51 (dd,  $J = 89.9, 13.4$  Hz, 2H), 2.37 (s, 3H), 1.20 (t,  $J = 7.1$  Hz, 3H).

**$^{13}\text{C}$  NMR** (101 MHz, Chloroform-*d*)  $\delta$  196.2, 169.8, 138.7, 138.5, 136.6, 134.4, 132.2, 130.8, 130.5, 129.2, 128.9, 128.5, 128.2, 127.9, 127.3, 126.8, 126.1, 62.0, 61.7, 42.0, 15.9, 14.0.

**HRMS** (ESI) Calculated for  $\text{C}_{27}\text{H}_{24}\text{O}_3\text{S}$  ( $[\text{M}] + \text{Na}^+$ ) = 451.1338, Found 451.1340.

**IR** (neat) 3746, 3059, 2981, 2350, 2054, 1990, 1739, 1677, 1593, 1442, 1277, 1157, 1036, 967, 896, 776, 636  $\text{cm}^{-1}$ .

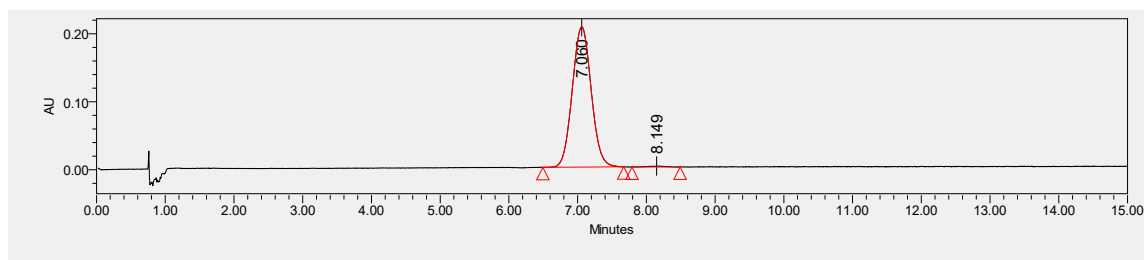

|   | Retention Time | Area    | % Area |
|---|----------------|---------|--------|
| 1 | 7.060          | 3938798 | 99.43  |
| 2 | 8.149          | 22433   | 0.57   |

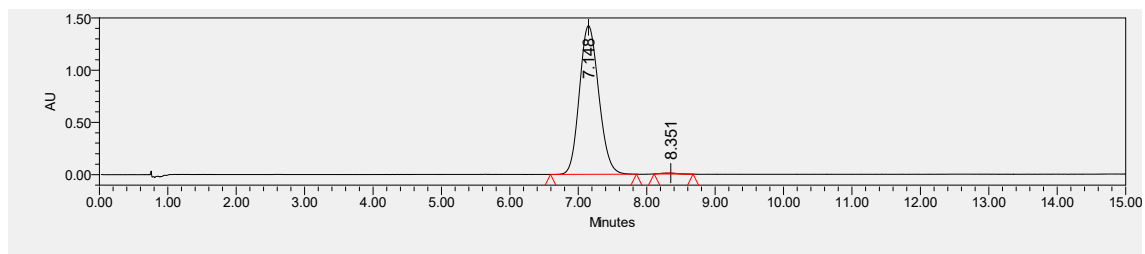

|   | Retention Time | Area     | % Area |
|---|----------------|----------|--------|
| 1 | 7.148          | 27856947 | 99.49  |
| 2 | 8.351          | 144117   | 0.51   |

**Ethyl (S)-2-(3,4-dimethoxybenzyl)-1-oxo-4-phenyl-1,2-dihydronaphthalene-2-carboxylate (B33)**

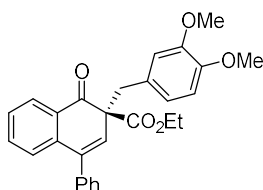

**Result:** colorless oil, 92% yield, 94% *ee*;  $[\alpha]^{26.5} = -57.2$  ( $c = 0.77$  in  $\text{CH}_2\text{Cl}_2$ ,  $\lambda = 589$  nm); SFC (Daicel chiralcel IC-3,  $\text{CO}_2/\text{MeOH} = 90/10$ , flow rate = 1.5 mL/min,  $\lambda = 254$  nm),  $t_1 = 11.70$  min,  $t_2 = 13.20$  min.

**$^1\text{H}$  NMR** (400 MHz, Chloroform-*d*)  $\delta$  8.09 (dd,  $J = 7.7, 1.5$  Hz, 1H), 7.40 (m, 4H), 7.32 (td,  $J = 7.5, 1.2$  Hz, 1H), 7.22 – 7.16 (m, 2H), 6.98 (d,  $J = 7.8$  Hz, 1H), 6.67 (dd,  $J = 8.2, 2.0$  Hz, 1H), 6.64 – 6.56 (m, 2H), 6.03 (s, 1H), 4.19 (q,  $J = 7.1$  Hz, 2H), 3.76 (s, 3H), 3.64 (d,  $J = 15.7$  Hz, 4H), 3.39 (d,  $J = 13.5$  Hz, 1H), 1.21 (t,  $J = 7.1$  Hz, 3H).

**$^{13}\text{C}$  NMR** (101 MHz, Chloroform-*d*)  $\delta$  196.5, 169.9, 147.9, 147.7, 138.7, 138.3, 137.9, 134.4, 130.9, 129.3, 128.8, 128.4, 128.1, 127.8, 127.8, 127.1, 126.8, 122.6, 113.1, 110.3, 62.0, 61.8, 55.7, 55.5, 42.5, 14.0.

**HRMS** (ESI) Calculated for  $\text{C}_{28}\text{H}_{26}\text{O}_5$  ( $[\text{M}] + \text{Na}^+$ ) = 465.1672, Found 465.1681.

**IR** (neat) 3747, 3627, 3060, 2981, 2356, 1989, 1739, 1676, 1641, 1591, 1445, 1264, 1029, 942, 897, 763,  $647\text{cm}^{-1}$ .

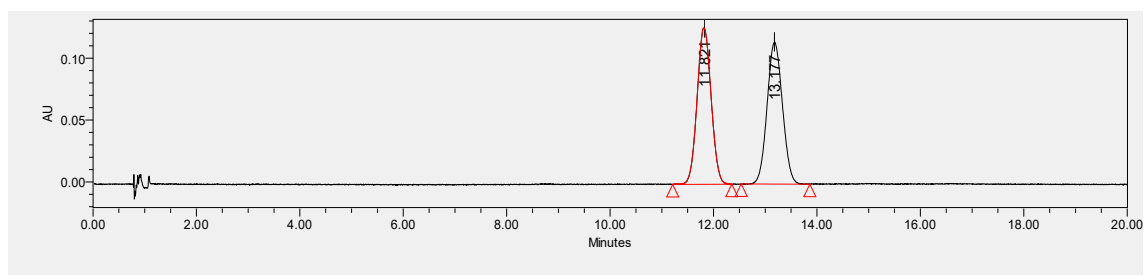

|   | Retention Time | Area    | % Area |
|---|----------------|---------|--------|
| 1 | 11.821         | 2374807 | 50.08  |
| 2 | 13.177         | 2367601 | 49.92  |

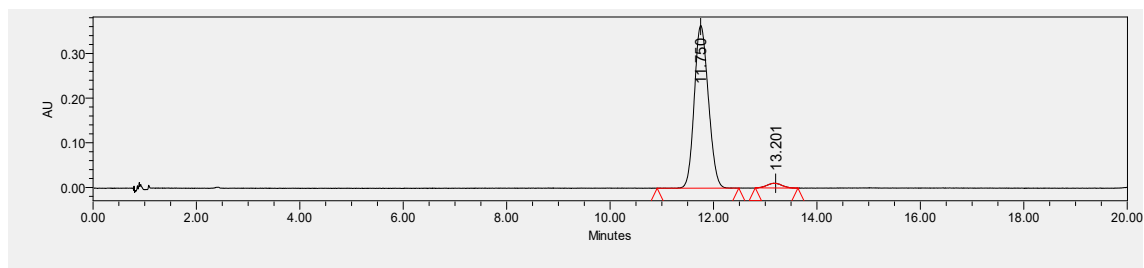

|   | Retention Time | Area    | % Area |
|---|----------------|---------|--------|
| 1 | 11.750         | 6883965 | 96.99  |
| 2 | 13.201         | 213499  | 3.01   |

**Ethyl (S)-1-oxo-4-phenyl-2-(3,4,5-trimethoxybenzyl)-1,2-dihydronaphthalene-2-carboxylate (B34)**

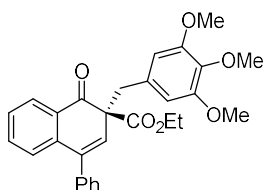

**Result:** colorless oil, 75% yield, 98% *ee*;  $[\alpha]^{26.7} = -64.0$  ( $c = 0.76$  in  $\text{CH}_2\text{Cl}_2$ ,  $\lambda = 589$  nm); SFC (Daicel chiralcel IC-3,  $\text{CO}_2/\text{MeOH} = 90/10$ , flow rate = 1.5 mL/min,  $\lambda = 254$  nm),  $t_1 = 11.73$  min,  $t_2 = 15.33$  min.

**$^1\text{H}$  NMR** (400 MHz, Chloroform-*d*)  $\delta$  8.08 (dd,  $J = 7.7, 1.6$  Hz, 1H), 7.44 – 7.37 (m, 4H), 7.33 (td,  $J = 7.5, 1.2$  Hz, 1H), 7.16 (m, 2H), 6.98 (dd,  $J = 7.9, 1.2$  Hz, 1H), 6.27 (s, 2H), 6.01 (s, 1H), 4.20 (q,  $J = 7.1$  Hz, 2H), 3.69 (s, 3H), 3.66 (d,  $J = 13.4$  Hz, 1H), 3.62 (s, 6H), 3.38 (d,  $J = 13.4$  Hz, 1H), 1.21 (t,  $J = 7.1$  Hz, 3H).

**$^{13}\text{C}$  NMR** (101 MHz, Chloroform-*d*)  $\delta$  196.6, 169.6, 152.3, 138.6, 138.4, 137.9, 136.7, 134.5, 131.0, 130.9, 129.4, 128.8, 128.4, 128.2, 127.9, 127.0, 126.9, 107.2, 62.0, 61.7, 60.7, 55.8, 43.3, 14.0.

**HRMS** (ESI) Calculated for  $\text{C}_{29}\text{H}_{28}\text{O}_6$  ( $[\text{M}] + \text{Na}^+$ ) = 495.1778, Found 495.1784.

**IR** (neat) 3747, 3610, 3060, 2987, 2836, 2350, 1988, 1739, 1676, 1641, 1422, 1276, 1040, 968, 840, 751, 662, 529  $\text{cm}^{-1}$ .

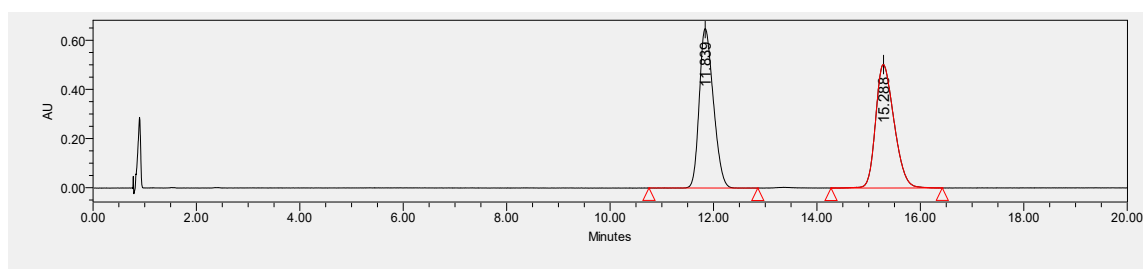

|   | Retention Time | Area     | % Area |
|---|----------------|----------|--------|
| 1 | 11.839         | 12263308 | 49.69  |
| 2 | 15.288         | 12418600 | 50.31  |

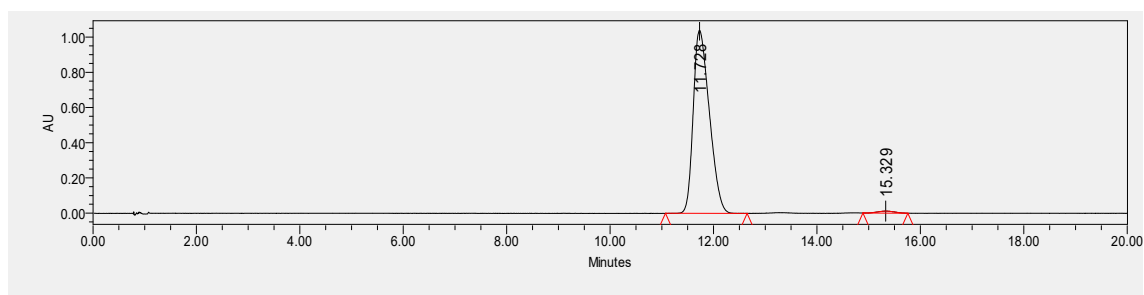

|   | Retention Time | Area     | % Area |
|---|----------------|----------|--------|
| 1 | 11.728         | 22486000 | 98.83  |
| 2 | 15.329         | 265424   | 1.17   |

**Ethyl (S)-2-(3-fluoro-4-methoxybenzyl)-1-oxo-4-phenyl-1,2-dihydronaphthalene-2-carboxylate (B35)**

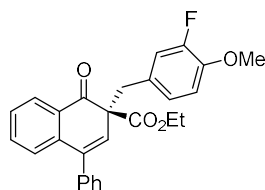

**Result:** colorless oil, 52% yield, 98% *ee*;  $[\alpha]^{26.5} = -53.4$  ( $c = 0.38$  in  $\text{CH}_2\text{Cl}_2$ ,  $\lambda = 589$  nm); SFC (Daicel chiralcel IG-3,  $\text{CO}_2/\text{MeOH} = 90/10$ , flow rate = 1.5 mL/min,  $\lambda = 254$  nm),  $t_1 = 10.00$  min,  $t_2 = 11.01$  min.

**$^1\text{H}$  NMR** (400 MHz, Chloroform-*d*)  $\delta$  8.06 (d,  $J = 8.0$  Hz, 1H), 7.46 – 7.38 (m, 4H), 7.33 (m, 1H), 7.23 (m, 2H), 6.98 (m, 1H), 6.87 (m, 1H), 6.81 (m, 1H), 6.67 (t,  $J = 8.6$  Hz, 1H), 6.02 (s, 1H), 4.19 (q,  $J = 7.1$  Hz, 2H), 3.76 (s, 3H), 3.47 (dd,  $J = 100.5, 13.5$  Hz, 2H), 1.20 (t,  $J = 7.1$  Hz, 3H).

**$^{13}\text{C}$  NMR** (101 MHz, Chloroform-*d*)  $\delta$  196.2, 169.7, 152.6, 150.2, 146.4, 146.3, 138.7, 138.6, 137.8, 134.4, 130.3, 129.2, 128.8, 128.5, 128.3, 128.2, 127.9, 127.3, 126.9, 126.1, 126.1, 118.0, 117.8, 112.5, 62.1, 61.7, 56.1, 41.5, 14.0.

**$^{19}\text{F}$  NMR** (377 MHz, Chloroform-*d*)  $\delta$  -136.15.

**HRMS** (ESI) Calculated for  $\text{C}_{27}\text{H}_{23}\text{FO}_4$  ( $[\text{M}] + \text{Na}^+$ ) = 453.1473, Found 453.1482.

**IR** (neat) 3743, 3061, 2984, 2840, 2055, 1988, 1739, 1676, 1644, 1592, 1444, 1276, 1030, 959, 858, 751, 644, 595  $\text{cm}^{-1}$ .

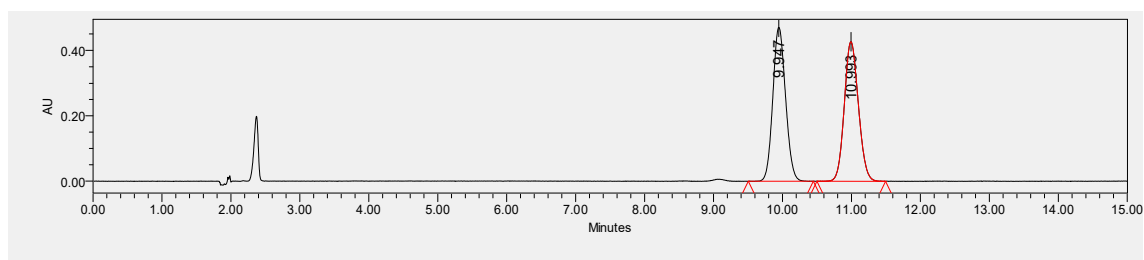

|   | Retention Time | Area    | % Area |
|---|----------------|---------|--------|
| 1 | 9.947          | 6032516 | 49.94  |
| 2 | 10.993         | 6047567 | 50.06  |

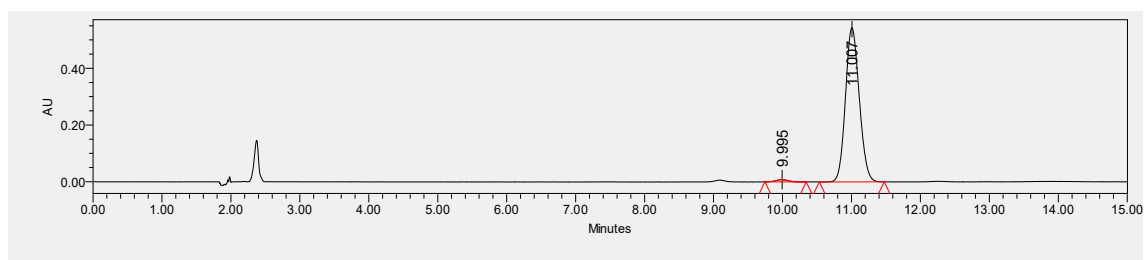

|   | Retention Time | Area    | % Area |
|---|----------------|---------|--------|
| 1 | 9.995          | 98911   | 1.29   |
| 2 | 11.007         | 7555895 | 98.71  |

**Ethyl (S)-2-(3-chloro-4-methoxybenzyl)-1-oxo-4-phenyl-1,2-dihydronaphthalene-2-carboxylate (B36)**

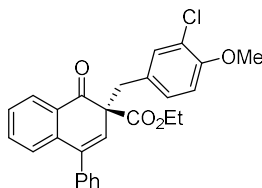

**Result:** White solid, Mp: 91-93 °C, 67% yield, 98% *ee*;  $[\alpha]^{26.4} = -73.4$  ( $c = 0.68$  in  $\text{CH}_2\text{Cl}_2$ ,  $\lambda = 589$  nm); SFC (Daicel chiralcel OZ-3,  $\text{CO}_2/\text{MeOH} = 90/10$ , flow rate = 1.5 mL/min,  $\lambda = 254$  nm),  $t_1 = 7.29$  min,  $t_2 = 7.90$  min.

**$^1\text{H}$  NMR** (400 MHz, Chloroform-*d*)  $\delta$  8.05 (dd,  $J = 7.7, 1.5$  Hz, 1H), 7.46 – 7.38 (m, 4H), 7.32 (td,  $J = 7.5, 1.2$  Hz, 1H), 7.26 – 7.23 (m, 2H), 7.15 (d,  $J = 2.2$  Hz, 1H), 6.98 – 6.93 (m, 2H), 6.62 (d,  $J = 8.4$  Hz, 1H), 6.01 (s, 1H), 4.19 (q,  $J = 7.1$  Hz, 2H), 3.75 (s, 3H), 3.45 (dd,  $J = 96.3, 13.4$  Hz, 2H), 1.20 (t,  $J = 7.1$  Hz, 3H).

**$^{13}\text{C}$  NMR** (101 MHz, Chloroform-*d*)  $\delta$  196.2, 169.8, 153.7, 138.9, 138.6, 137.8, 134.4, 131.9, 130.2, 129.6, 129.1, 128.9, 128.5, 128.3, 128.3, 127.9, 127.2, 126.98, 121.3, 111.2, 62.1, 61.7, 56.0, 41.4, 14.0.

**HRMS** (ESI) Calculated for  $\text{C}_{27}\text{H}_{23}\text{ClO}_4$  ( $[\text{M}] + \text{Na}^+$ ) = 469.1177, Found 469.1186.

**IR** (neat) 3747, 3061, 2979, 2838, 2055, 1988, 1739, 1676, 1643, 1592, 1442, 1290, 1065, 942, 855, 775, 640, 589  $\text{cm}^{-1}$ .

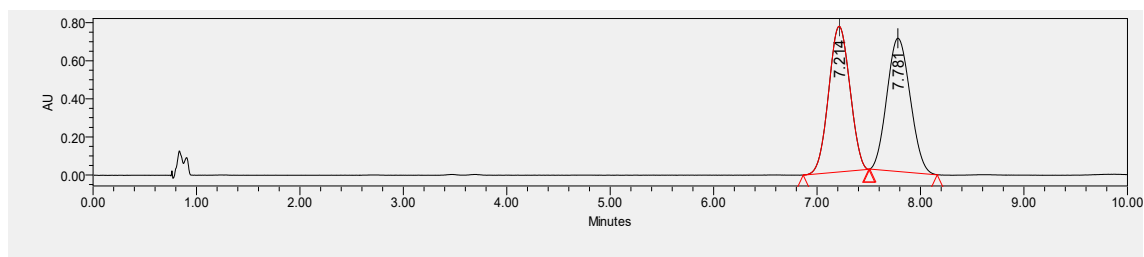

|   | Retention Time | Area     | % Area |
|---|----------------|----------|--------|
| 1 | 7.214          | 10912237 | 49.92  |
| 2 | 7.781          | 10946141 | 50.08  |

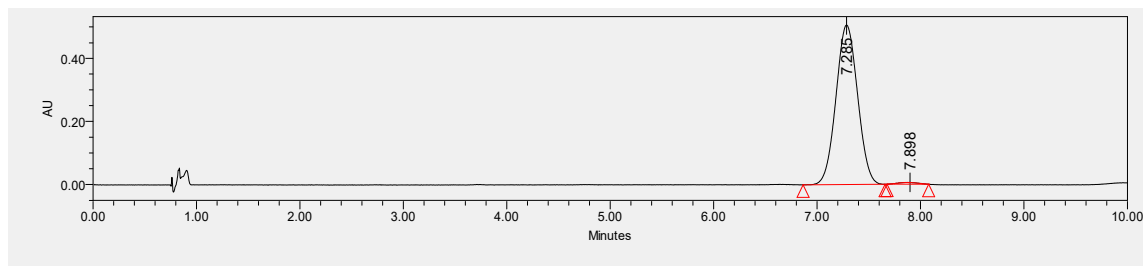

|   | Retention Time | Area    | % Area |
|---|----------------|---------|--------|
| 1 | 7.285          | 7340810 | 98.99  |
| 2 | 7.898          | 74850   | 1.01   |

**Ethyl (S)-2-(3-bromo-4-methoxybenzyl)-1-oxo-4-phenyl-1,2-dihydronaphthalene-2-carboxylate (B37)**

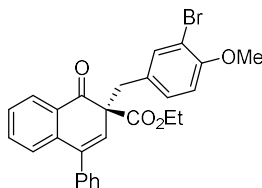

**Result:** White solid, Mp: 92-94 °C, 61% yield, 98% *ee*;  $[\alpha]^{25.9} = -91.1$  ( $c = 0.66$  in  $\text{CH}_2\text{Cl}_2$ ,  $\lambda = 589$  nm); SFC (Daicel chiralcel OZ-3,  $\text{CO}_2/\text{MeOH} = 90/10$ , flow rate = 1.5 mL/min,  $\lambda = 254$  nm),  $t_1 = 8.96$  min,  $t_2 = 9.73$  min.

**$^1\text{H}$  NMR** (400 MHz, Chloroform-*d*)  $\delta$  8.06 (dd,  $J = 7.7, 1.6$  Hz, 1H), 7.48 – 7.38 (m, 4H), 7.35 – 7.30 (m, 2H), 7.28 – 7.25 (m, 2H), 7.00 (dd,  $J = 8.4, 2.2$  Hz, 1H), 6.97 (d,  $J = 7.8$  Hz, 1H), 6.60 (d,  $J = 8.4$  Hz, 1H), 6.02 (s, 1H), 4.20 (q,  $J = 7.1$  Hz, 2H), 3.75 (s, 3H), 3.45 (dd,  $J = 94.1, 13.5$  Hz, 2H), 1.21 (t,  $J = 7.1$  Hz, 3H).

**$^{13}\text{C}$  NMR** (101 MHz, Chloroform-*d*)  $\delta$  196.2, 169.8, 154.6, 138.9, 138.6, 137.8, 135.0, 134.4, 130.4, 130.2, 129.1, 129.0, 128.8, 128.5, 128.3, 127.9, 127.2, 126.9, 111.0, 110.5, 62.1, 61.7, 56.1, 41.3, 14.0.

**HRMS** (ESI) Calculated for  $\text{C}_{27}\text{H}_{23}^{79}\text{BrO}_4$  ( $[\text{M}]+\text{Na}^+$ ) = 513.0672, Found 513.0682.

**HRMS** (ESI) Calculated for  $\text{C}_{27}\text{H}_{23}^{81}\text{BrO}_4$  ( $[\text{M}]+\text{Na}^+$ ) = 515.0651, Found 515.0661.

**IR** (neat) 3747, 3005, 2982, 2837, 2055, 1987, 1739, 1676, 1593, 1442, 1355, 1277, 1055, 942, 854, 763, 639, 586  $\text{cm}^{-1}$ .

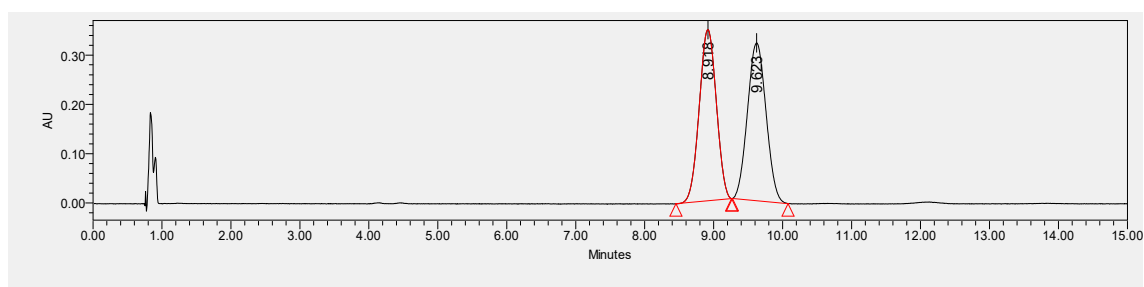

|   | Retention Time | Area    | % Area |
|---|----------------|---------|--------|
| 1 | 8.918          | 5963346 | 49.90  |
| 2 | 9.623          | 5988218 | 50.10  |

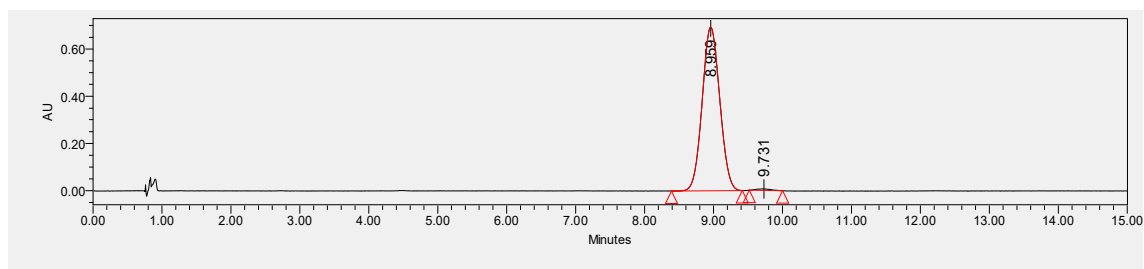

|   | Retention Time | Area     | % Area |
|---|----------------|----------|--------|
| 1 | 8.959          | 12258592 | 99.24  |
| 2 | 9.731          | 94046    | 0.76   |

**Ethyl (S)-2-(benzofuran-5-ylmethyl)-1-oxo-4-phenyl-1,2-dihydronaphthalene-2-carboxylate (B38)**

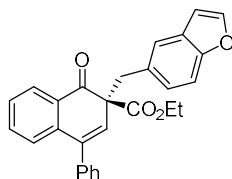

**Result:** colorless oil, 85% yield, 95% *ee*;  $[\alpha]^{26.7} = -39.4$  ( $c = 0.46$  in  $\text{CH}_2\text{Cl}_2$ ,  $\lambda = 589$  nm); SFC (Daicel chiralcel OZ-3,  $\text{CO}_2/\text{MeOH} = 90/10$ , flow rate = 1.5 mL/min,  $\lambda = 254$  nm),  $t_1 = 5.60$  min,  $t_2 = 7.15$  min.

**$^1\text{H NMR}$**  (400 MHz, Chloroform-*d*)  $\delta$  8.06 (d,  $J = 7.2$  Hz, 1H), 7.50 (d,  $J = 2.3$  Hz, 1H), 7.42 – 7.17 (m, 9H), 7.04 (dd,  $J = 8.5, 1.8$  Hz, 1H), 6.89 (d,  $J = 7.2$  Hz, 1H), 6.61 (s, 1H), 6.07 (s, 1H), 4.21 (q,  $J = 7.1$  Hz, 2H), 3.65 (dd,  $J = 89.9, 13.4$  Hz, 2H), 1.21 (t,  $J = 7.1$  Hz, 3H).

**$^{13}\text{C NMR}$**  (101 MHz, Chloroform-*d*)  $\delta$  196.4, 170.0, 153.9, 145.0, 138.8, 138.4, 137.8, 134.3, 130.7, 129.6, 128.9, 128.4, 128.1, 127.8, 127.2, 126.9, 126.7, 122.9, 110.3, 106.3, 62.1, 62.0, 42.5, 14.0.

**HRMS** (ESI) Calculated for  $\text{C}_{28}\text{H}_{22}\text{O}_4$  ( $[\text{M}+\text{Na}^+]$ ) = 445.1410, Found 445.1401.

**IR** (neat) 3747, 3060, 2982, 2849, 2349, 2055, 1987, 1738, 1676, 1593, 1444, 1276, 1157, 1032, 941, 884, 764, 652  $\text{cm}^{-1}$ .

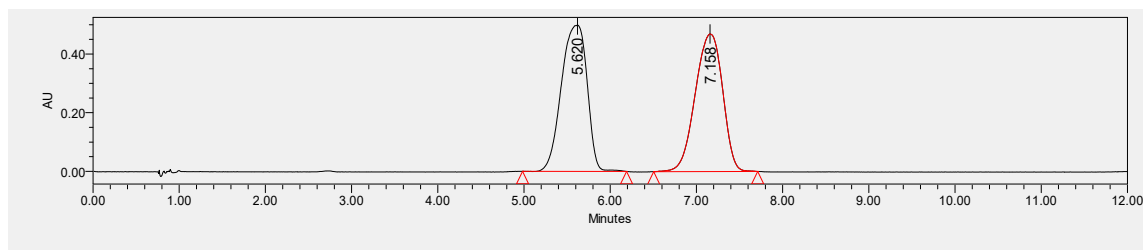

|   | Retention Time | Area     | % Area |
|---|----------------|----------|--------|
| 1 | 5.620          | 10359129 | 49.98  |
| 2 | 7.158          | 10368233 | 50.02  |

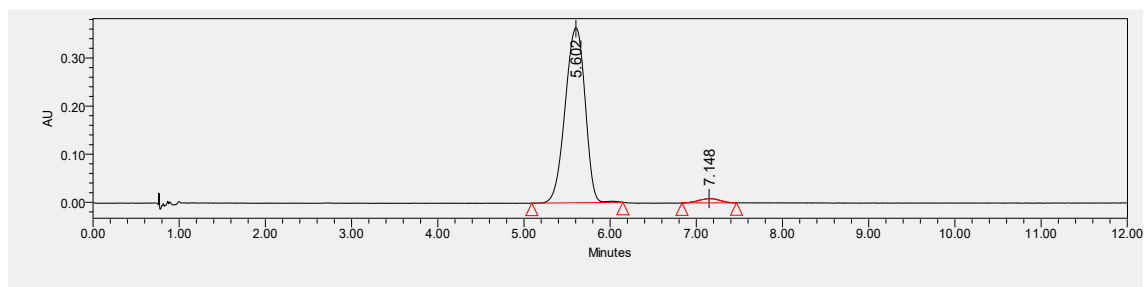

|   | Retention Time | Area    | % Area |
|---|----------------|---------|--------|
| 1 | 5.602          | 5825128 | 97.45  |
| 2 | 7.148          | 152385  | 2.55   |

**Ethyl (S)-2-((2,3-dihydrobenzofuran-5-yl)methyl)-1-oxo-4-phenyl-1,2-dihydronaphthalene-2-carboxylate (B39)**

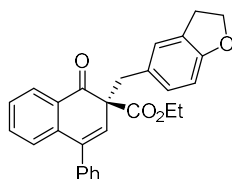

**Result:** colorless oil, 82% yield, 93% *ee*;  $[\alpha]^{26.4} = -88.8$  ( $c = 0.67$  in  $\text{CH}_2\text{Cl}_2$ ,  $\lambda = 589$  nm); SFC (Daicel chiralcel OZ-3,  $\text{CO}_2/\text{MeOH} = 90/10$ , flow rate = 1.5 mL/min,  $\lambda = 254$  nm),  $t_1 = 8.30$  min,  $t_2 = 10.13$  min.

**$^1\text{H}$  NMR** (400 MHz, Chloroform-*d*)  $\delta$  8.06 (dd,  $J = 7.7, 1.6$  Hz, 1H), 7.45 – 7.38 (m, 4H), 7.32 (td,  $J = 7.6, 1.3$  Hz, 1H), 7.23 (m, 2H), 6.98 – 6.93 (m, 2H), 6.84 (d,  $J = 7.7$  Hz, 1H), 6.51 (d,  $J = 8.1$  Hz, 1H), 6.03 (s, 1H), 4.43 (m, 2H), 4.20 (q,  $J = 7.1$  Hz, 2H), 3.48 (dd,  $J = 85.3, 13.4$  Hz, 2H), 3.07 – 2.95 (m, 2H), 1.21 (t,  $J = 7.1$  Hz, 3H).

**$^{13}\text{C}$  NMR** (101 MHz, Chloroform-*d*)  $\delta$  196.6, 170.0, 158.8, 138.8, 138.2, 137.9, 134.2, 130.8, 130.0, 129.3, 128.9, 128.4, 128.0, 127.8, 127.1, 127.0, 126.9, 126.7, 126.2, 108.2, 71.1, 62.0, 61.9, 42.2, 29.5, 14.0.

**HRMS** (ESI) Calculated for  $\text{C}_{28}\text{H}_{24}\text{O}_4$  ( $[\text{M}] + \text{Na}^+$ ) = 447.1567, Found 447.1573.

**IR** (neat) 3747, 3058, 2979, 2353, 2088, 1993, 1739, 1676, 1593, 1443, 1277, 1156, 1038, 983, 857, 775, 659, 578  $\text{cm}^{-1}$ .

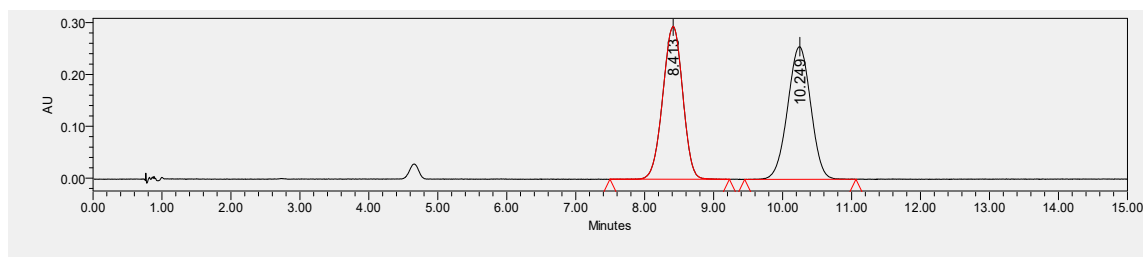

|   | Retention Time | Area    | % Area |
|---|----------------|---------|--------|
| 1 | 8.413          | 5907398 | 49.86  |
| 2 | 10.249         | 5940969 | 50.14  |

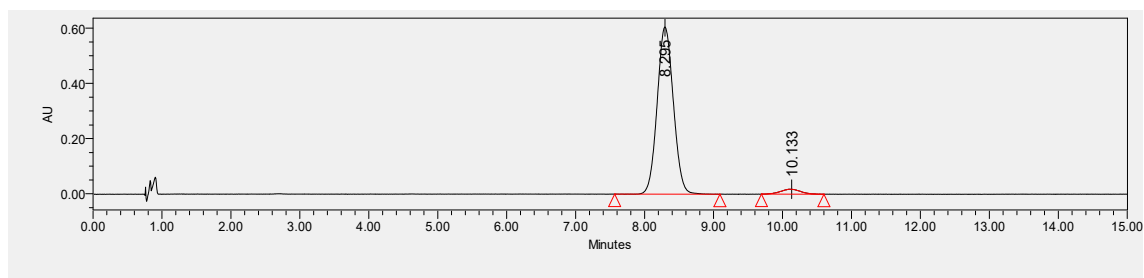

|   | Retention Time | Area    | % Area |
|---|----------------|---------|--------|
| 1 | 8.295          | 9865564 | 96.46  |
| 2 | 10.133         | 361870  | 3.54   |



**Ethyl (S)-2-(benzo[d][1,3]dioxol-5-ylmethyl)-1-oxo-4-phenyl-1,2-dihydronaphthalene-2-carboxylate (B40)**

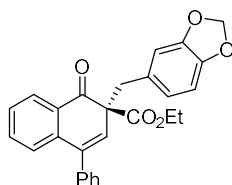

**Result:** colorless oil, 65% yield, 99% *ee*;  $[\alpha]^{25.0} = -57.0$  ( $c = 0.55$  in  $\text{CH}_2\text{Cl}_2$ ,  $\lambda = 589$  nm); SFC (Daicel chiralcel IE-3,  $\text{CO}_2/\text{MeOH} = 90/10$ , flow rate = 1.5 mL/min,  $\lambda = 254$  nm),  $t_1 = 6.98$  min,  $t_2 = 7.43$  min.

**$^1\text{H}$  NMR** (400 MHz, Chloroform-*d*)  $\delta$  8.07 (dd,  $J = 7.7, 1.5$  Hz, 1H), 7.47 – 7.39 (m, 4H), 7.33 (td,  $J = 7.5, 1.3$  Hz, 1H), 7.24 (m, 2H), 6.99 (d,  $J = 7.5$  Hz, 1H), 6.62 (s, 1H), 6.59 – 6.53 (m, 2H), 6.02 (s, 1H), 5.81 (dd,  $J = 9.0, 1.4$  Hz, 2H), 4.19 (q,  $J = 7.1$  Hz, 2H), 3.47 (dd,  $J = 88.6, 13.4$  Hz, 2H), 1.20 (t,  $J = 7.1$  Hz, 3H).

**$^{13}\text{C}$  NMR** (101 MHz, Chloroform-*d*)  $\delta$  196.3, 169.8, 146.9, 146.2, 138.8, 138.4, 137.9, 134.3, 130.6, 129.2, 128.9, 128.5, 128.2, 127.8, 127.3, 126.8, 123.6, 110.7, 107.5, 100.7, 62.0, 61.9, 42.2, 14.0.

**HRMS** (ESI) Calculated for  $\text{C}_{27}\text{H}_{22}\text{O}_5$  ( $[\text{M}+\text{Na}^+]$ ) = 449.1359, Found 449.1360.

**IR** (neat) 3747, 3061, 2980, 2898, 2328, 1738, 1677, 1641, 1593, 1443, 1278, 1157, 1038, 930, 897, 776, 648, 594  $\text{cm}^{-1}$ .

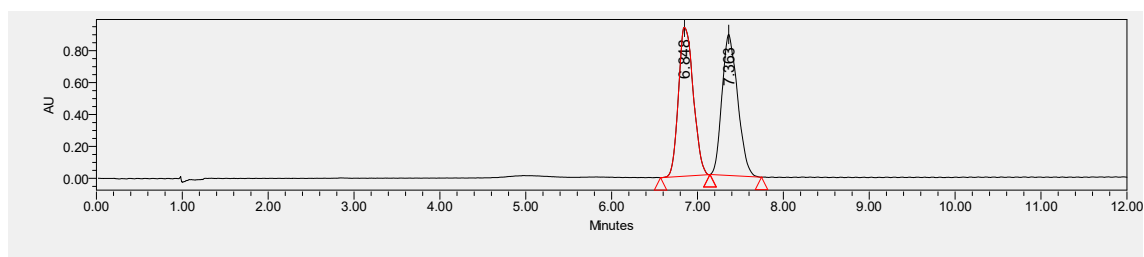

|   | Retention Time | Area     | % Area |
|---|----------------|----------|--------|
| 1 | 6.848          | 11161324 | 49.96  |
| 2 | 7.363          | 11179071 | 50.04  |

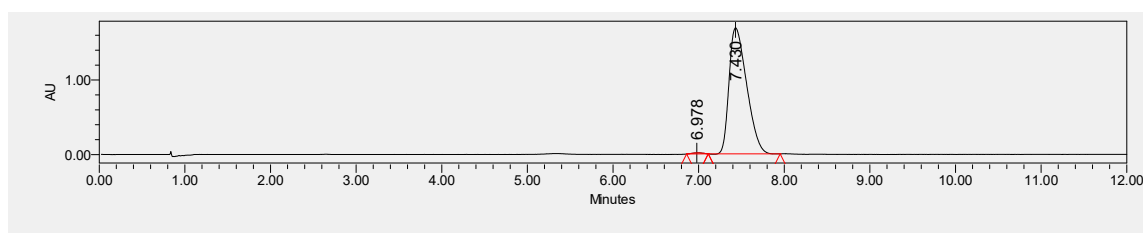

|   | Retention Time | Area     | % Area |
|---|----------------|----------|--------|
| 1 | 6.978          | 133460   | 0.55   |
| 2 | 7.430          | 24130924 | 99.45  |

## Ethyl

### (S)-2-((2,3-dihydrobenzo[b][1,4]dioxin-6-yl)methyl)-1-oxo-4-phenyl-1,2-dihydronaphthalene-2-carboxylate (B41)

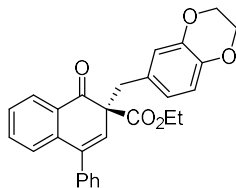

**Result:** colorless oil, 74% yield, 96% *ee*;  $[\alpha]^{25.9} = -67.9$  ( $c = 0.62$  in  $\text{CH}_2\text{Cl}_2$ ,  $\lambda = 589$  nm); SFC (Daicel chiralcel OZ-3,  $\text{CO}_2/\text{MeOH} = 90/10$ , flow rate = 1.5 mL/min,  $\lambda = 254$  nm),  $t_1 = 8.99$  min,  $t_2 = 10.04$  min.

**$^1\text{H}$  NMR** (400 MHz, Chloroform-*d*)  $\delta$  8.06 (dd,  $J = 7.6, 1.6$  Hz, 1H), 7.45 – 7.37 (m, 4H), 7.32 (td,  $J = 7.5, 1.3$  Hz, 1H), 7.25 (m, 2H), 6.98 (d,  $J = 7.7$  Hz, 1H), 6.65 (s, 1H), 6.57 (s, 2H), 6.02 (s, 1H), 4.19 (q,  $J = 7.1$  Hz, 2H), 4.12 (s, 4H), 3.44 (dd,  $J = 76.8, 13.4$  Hz, 2H), 1.20 (t,  $J = 7.1$  Hz, 3H).

**$^{13}\text{C}$  NMR** (101 MHz, Chloroform-*d*)  $\delta$  196.3, 169.9, 142.6, 142.3, 138.8, 138.3, 137.9, 134.2, 130.7, 129.3, 128.9, 128.4, 128.4, 128.1, 127.8, 127.3, 126.7, 123.4, 119.2, 116.3, 64.2, 64.1, 62.0, 61.8, 41.9, 14.0.

**HRMS** (ESI) Calculated for  $\text{C}_{28}\text{H}_{24}\text{O}_5$  ( $[\text{M}] + \text{Na}^+$ ) = 463.1516, Found 463.1523.

**IR** (neat) 3747, 3060, 2980, 2874, 2384, 1985, 1738, 1677, 1642, 1591, 1443, 1259, 1050, 957, 887, 776, 658, 595  $\text{cm}^{-1}$ .

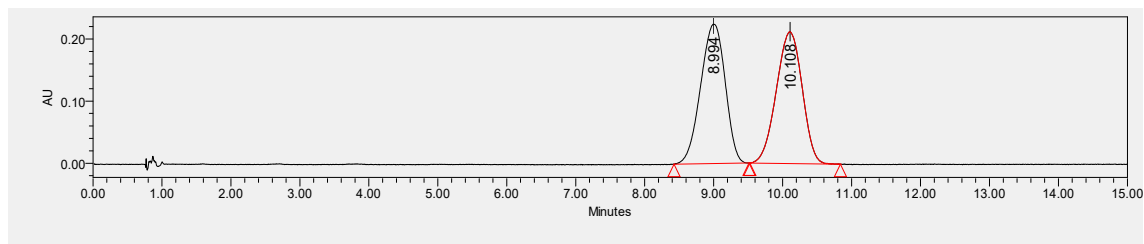

|   | Retention Time | Area    | % Area |
|---|----------------|---------|--------|
| 1 | 8.994          | 5554137 | 50.18  |
| 2 | 10.108         | 5513990 | 49.82  |

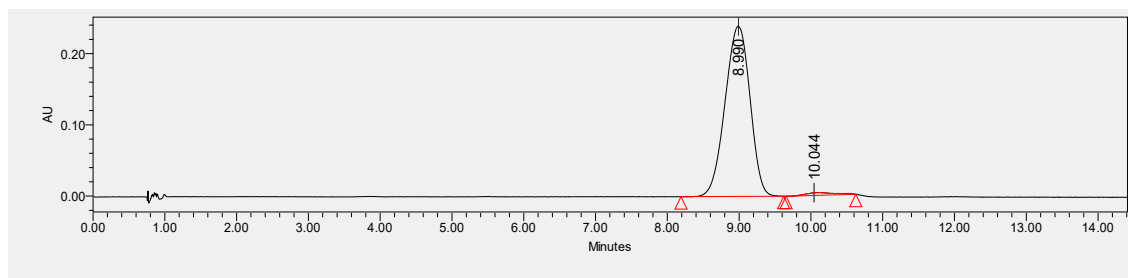

|   | Retention Time | Area    | % Area |
|---|----------------|---------|--------|
| 1 | 8.990          | 5767061 | 98.15  |
| 2 | 10.044         | 108702  | 1.85   |

**Ethyl (S)-2-((4-methoxynaphthalen-1-yl)methyl)-1-oxo-4-phenyl-1,2-dihydronaphthalene-2-carboxylate (B42)**

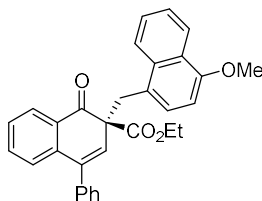

**Result:** White solid, Mp: 119-121 °C, 52% yield, 82% *ee*;  $[\alpha]^{25.8} = -181.2$  ( $c = 0.46$  in  $\text{CH}_2\text{Cl}_2$ ,  $\lambda = 589$  nm); SFC (Daicel chiralcel OZ-3,  $\text{CO}_2/\text{MeOH} = 90/10$ , flow rate = 1.5 mL/min,  $\lambda = 254$  nm),  $t_1 = 12.32$  min,  $t_2 = 14.01$  min.

**$^1\text{H NMR}$**  (400 MHz, Chloroform-*d*)  $\delta$  8.19 (d,  $J = 9.1$  Hz, 1H), 8.04 – 7.91 (m, 2H), 7.46 – 7.38 (m, 2H), 7.34 – 7.22 (m, 5H), 7.16 (d,  $J = 7.9$  Hz, 1H), 6.92 – 6.61 (m, 3H), 6.48 (d,  $J = 7.9$  Hz, 1H), 5.98 (s, 1H), 4.22 (qt,  $J = 6.2, 3.2$  Hz, 2H), 4.02 (d,  $J = 5.4$  Hz, 2H), 3.85 (s, 3H), 1.21 (t,  $J = 7.1$  Hz, 3H).

**$^{13}\text{C NMR}$**  (101 MHz, Chloroform-*d*)  $\delta$  197.2 , 170.4 , 154.5 , 138.6 , 137.8 , 137.7 , 134.1 , 133.5 , 130.9 , 129.4 , 128.7 , 128.4 , 128.1 , 127.9 , 127.5 , 127.0 , 126.5 , 126.3 , 125.4 , 124.6 , 124.3 , 123.4 , 122.2 , 102.8 , 62.3 , 62.0 , 55.3 , 37.9 , 14.0 .

**HRMS** (ESI) Calculated for  $\text{C}_{31}\text{H}_{26}\text{O}_4$  ( $[\text{M}+\text{Na}^+]$ ) = 485.1723, Found 485.1729.

**IR** (neat) 3746, 3058, 2979, 2846, 2344, 1984, 1739, 1676, 1641, 1446, 1273, 1070, 942, 893, 767, 633, 598  $\text{cm}^{-1}$ .

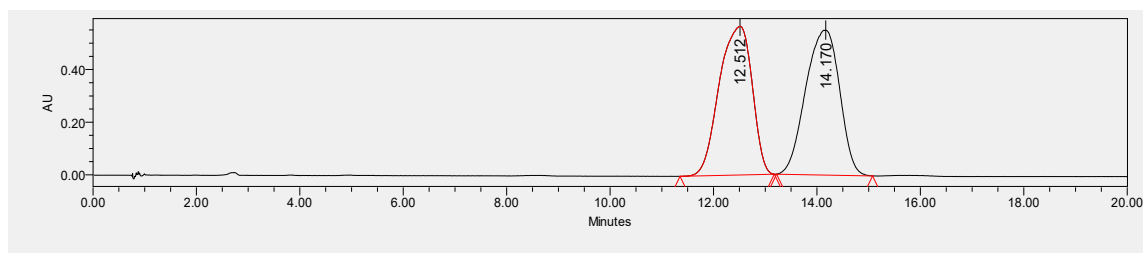

|   | Retention Time | Area     | % Area |
|---|----------------|----------|--------|
| 1 | 12.512         | 24928386 | 49.85  |
| 2 | 14.170         | 25074507 | 50.15  |

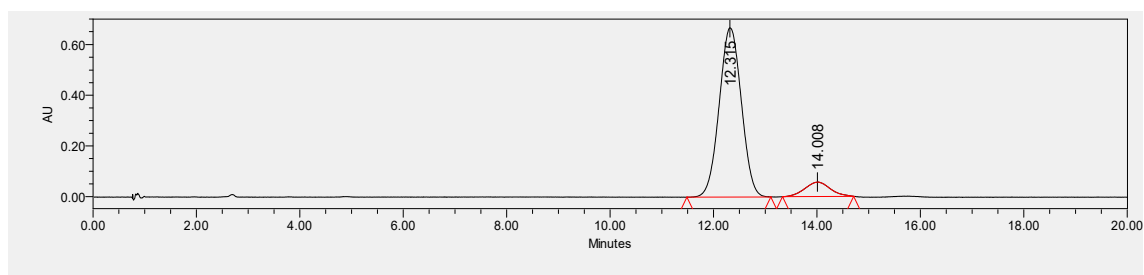

|   | Retention Time | Area     | % Area |
|---|----------------|----------|--------|
| 1 | 12.315         | 19838733 | 91.09  |
| 2 | 14.008         | 1939925  | 8.91   |

**Ethyl (S)-1-oxo-4-phenyl-2-(thiophen-2-ylmethyl)-1,2-dihydronaphthalene-2-carboxylate (B43)**

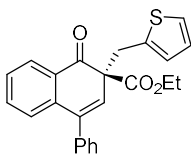

**Result:** White solid, Mp: 86-88 °C, 84% yield, 99% *ee*;  $[\alpha]^{26.2} = -17.4$  ( $c = 0.74$  in  $\text{CH}_2\text{Cl}_2$ ,  $\lambda = 589$  nm); SFC (Daicel chiralcel OD-3,  $\text{CO}_2/\text{MeOH} = 90/10$ , flow rate = 1.5 mL/min,  $\lambda = 254$  nm),  $t_1 = 3.35$  min,  $t_2 = 3.69$  min.

**$^1\text{H}$  NMR** (400 MHz, Chloroform-*d*)  $\delta$  8.13 (d,  $J = 7.2$  Hz, 1H), 7.42 (m, 5H), 7.26 – 7.23 (m, 2H), 7.11 (s, 1H), 7.06 (d,  $J = 7.8$  Hz, 1H), 6.13 – 6.10 (m, 1H), 6.01 (s, 1H), 5.98 (d,  $J = 3.2$  Hz, 1H), 4.17 (t,  $J = 7.1$  Hz, 2H), 3.70 – 3.52 (m, 2H), 1.19 (t,  $J = 7.1$  Hz, 3H).

**$^{13}\text{C}$  NMR** (101 MHz, Chloroform-*d*)  $\delta$  195.8, 169.3, 150.5, 141.4, 138.7, 138.0, 137.9, 134.3, 130.3, 129.0, 129.0, 128.4, 128.2, 127.8, 127.4, 126.8, 110.1, 108.0, 62.1, 60.5, 34.8, 13.9.

**HRMS** (ESI) Calculated for  $\text{C}_{24}\text{H}_{20}\text{O}_3\text{S}$  ( $[\text{M}] + \text{Na}^+$ ) = 411.1025, Found 411.1029.

**IR** (neat) 3746, 3060, 2981, 2349, 1985, 1739, 1679, 1642, 1593, 1445, 1276, 1034, 943, 884, 776, 638, 599  $\text{cm}^{-1}$ .

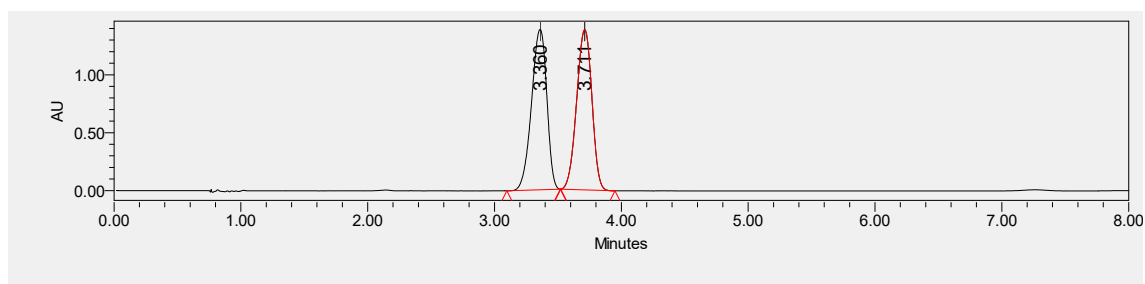

|   | Retention Time | Area     | % Area |
|---|----------------|----------|--------|
| 1 | 3.360          | 11577666 | 50.01  |
| 2 | 3.711          | 11572834 | 49.99  |

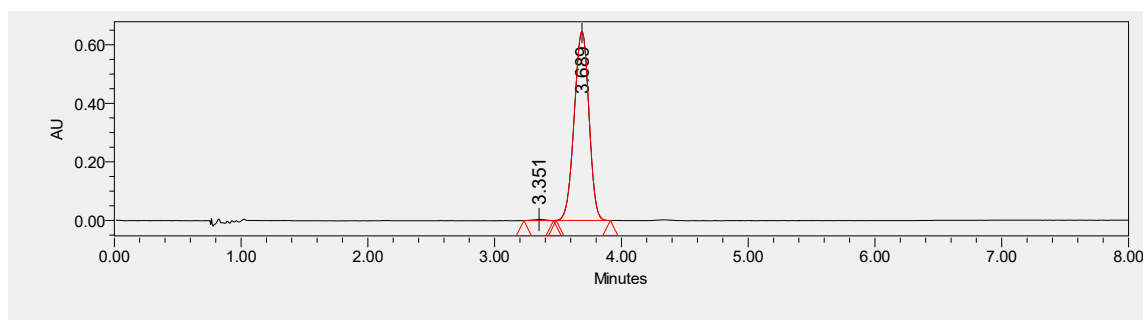

|   | Retention Time | Area    | % Area |
|---|----------------|---------|--------|
| 1 | 3.351          | 24793   | 0.47   |
| 2 | 3.689          | 5206908 | 99.53  |

### Ethyl (S)-2-(furan-2-ylmethyl)-1-oxo-4-phenyl-1,2-dihydronaphthalene-2-carboxylate (B44)

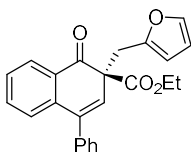

**Result:** White solid, Mp: 73-75 °C, 76% yield, 99% *ee*;  $[\alpha]^{25.8} = -26.6$  ( $c = 0.64$  in  $\text{CH}_2\text{Cl}_2$ ,  $\lambda = 589$  nm); SFC (Daicel chiralcel OX-H,  $\text{CO}_2/\text{MeOH} = 90/10$ , flow rate = 1.5 mL/min,  $\lambda = 254$  nm),  $t_1 = 8.13$  min,  $t_2 = 8.67$  min.

**$^1\text{H}$  NMR** (400 MHz, Chloroform-*d*)  $\delta$  8.09 (dd,  $J = 7.7, 1.6$  Hz, 1H), 7.46 – 7.41 (m, 4H), 7.38 – 7.34 (m, 1H), 7.30 (m, 2H), 7.06 (d,  $J = 8.5$  Hz, 1H), 7.01 (dd,  $J = 4.4, 2.0$  Hz, 1H), 6.77 (d,  $J = 4.4$  Hz, 2H), 6.06 (s, 1H), 4.22 – 4.17 (m, 2H), 3.92 – 3.64 (m, 2H), 1.19 (d,  $J = 7.1$  Hz, 3H).

**$^{13}\text{C}$  NMR** (101 MHz, Chloroform-*d*)  $\delta$  195.9, 169.4, 139.1, 138.7, 137.9, 137.2, 134.4, 130.4, 129.2, 128.9, 128.4, 128.3, 127.9, 127.5, 127.4, 126.9, 126.4, 124.5, 62.1, 61.6, 36.4, 14.0.

**HRMS** (ESI) Calculated for  $\text{C}_{24}\text{H}_{20}\text{O}_4$  ( $[\text{M}]+\text{Na}^+$ ) = 395.1254, Found 395.1236.

**IR** (neat) 3746, 3063, 2985, 2349, 1988, 1738, 1677, 1642, 1593, 1445, 1275, 1033, 941, 895, 763, 642, 588  $\text{cm}^{-1}$ .

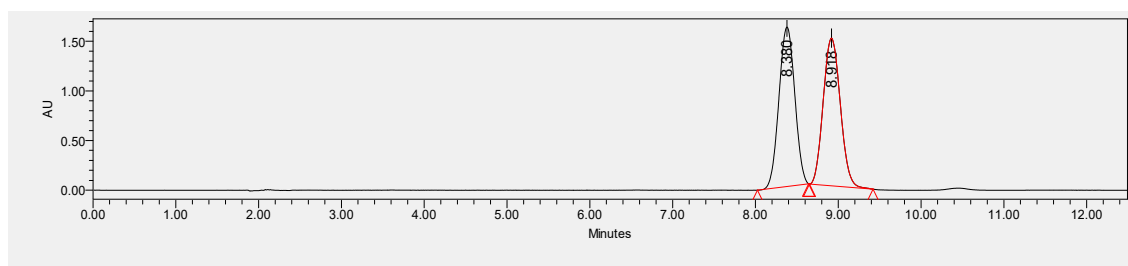

|   | Retention Time | Area     | % Area |
|---|----------------|----------|--------|
| 1 | 8.380          | 21346679 | 50.00  |
| 2 | 8.918          | 21343223 | 50.00  |

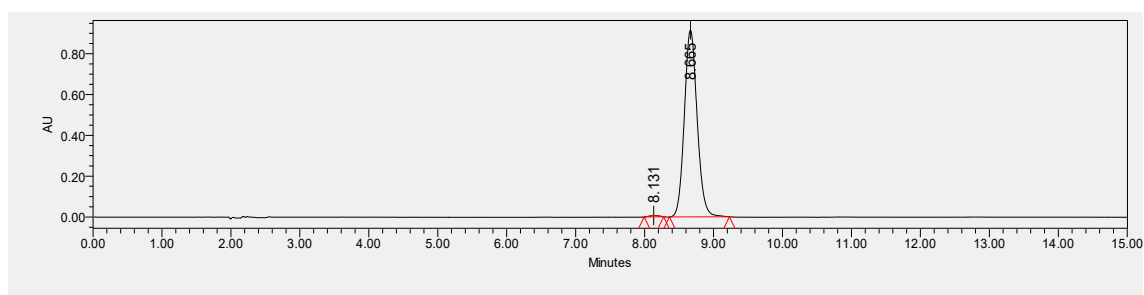

|   | Retention Time | Area     | % Area |
|---|----------------|----------|--------|
| 1 | 8.131          | 62502    | 0.53   |
| 2 | 8.665          | 11796054 | 99.47  |

### Ethyl 1-hydroxy-4-(1-(4-methoxyphenyl)ethyl)-2-naphthoate (B45)

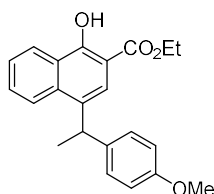

**Result:** colorless oil, 30% yield, 56% *ee*;  $[\alpha]^{26.4} = 82.6$  ( $c = 0.18$  in  $\text{CH}_2\text{Cl}_2$ ,  $\lambda = 589$  nm); SFC (Daicel chiralcel IG,  $\text{CO}_2/\text{MeOH} = 90/10$ , flow rate = 1.5 mL/min,  $\lambda = 254$  nm),  $t_1 = 10.82$  min,  $t_2 = 12.57$  min.

**$^1\text{H}$  NMR** (400 MHz, Chloroform-*d*)  $\delta$  12.03 (s, 1H), 8.46 – 8.43 (m, 1H), 7.88 (d,  $J = 7.6$  Hz, 1H), 7.78 – 7.77 (m, 1H), 7.52 – 7.46 (m, 2H), 7.12 (d,  $J = 8.7$  Hz, 2H), 6.79 (d,  $J = 8.7$  Hz, 2H), 4.68 (d,  $J = 7.1$  Hz, 1H), 4.51 – 4.46 (m, 2H), 3.75 (s, 3H), 1.73 (d,  $J = 7.1$  Hz, 3H), 1.48 (d,  $J = 7.1$  Hz, 3H).

**$^{13}\text{C}$  NMR** (101 MHz, Chloroform-*d*)  $\delta$  171.2, 156.0, 157.7, 138.9, 135.6, 131.7, 129.2, 128.3, 125.3, 125.2, 124.4, 124.2, 121.9, 113.8, 105.0, 61.4, 55.2, 39.6, 22.9, 14.3.

**HRMS** (ESI) Calculated for  $\text{C}_{22}\text{H}_{22}\text{O}_4$  ( $[\text{M}] + \text{Na}^+$ ) = 373.1410, Found 373.1401.

**IR** (neat) 2930, 1659, 1631, 1510, 1451, 1373, 1337, 1175, 1095, 1033, 831, 768, 557  $\text{cm}^{-1}$ .

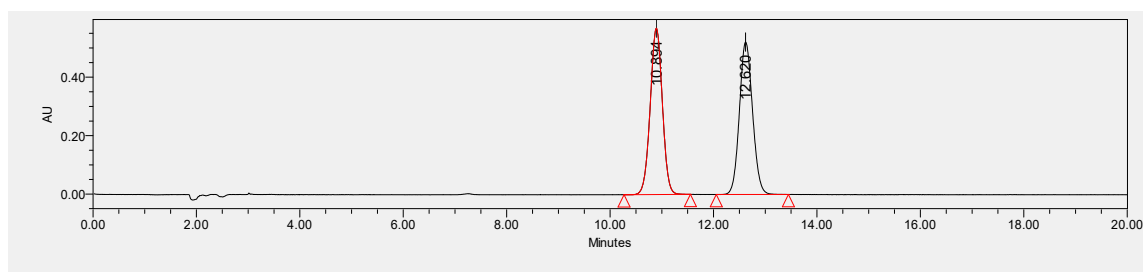

|   | Retention Time | Area    | % Area |
|---|----------------|---------|--------|
| 1 | 10.894         | 9263251 | 50.15  |
| 2 | 12.620         | 9206068 | 49.85  |

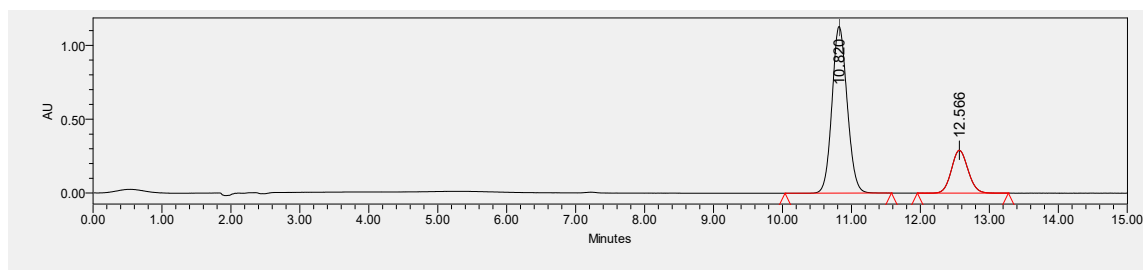

|   | Retention Time | Area     | % Area |
|---|----------------|----------|--------|
| 1 | 10.820         | 17245788 | 78.00  |
| 2 | 12.566         | 4865013  | 22.00  |

## 11. Copies of NMR Spectra for the Reaction Products

### Ethyl (S)-2-(4-methoxybenzyl)-1-oxo-4-phenyl-1,2-dihydronaphthalene-2-carboxylate (B1)

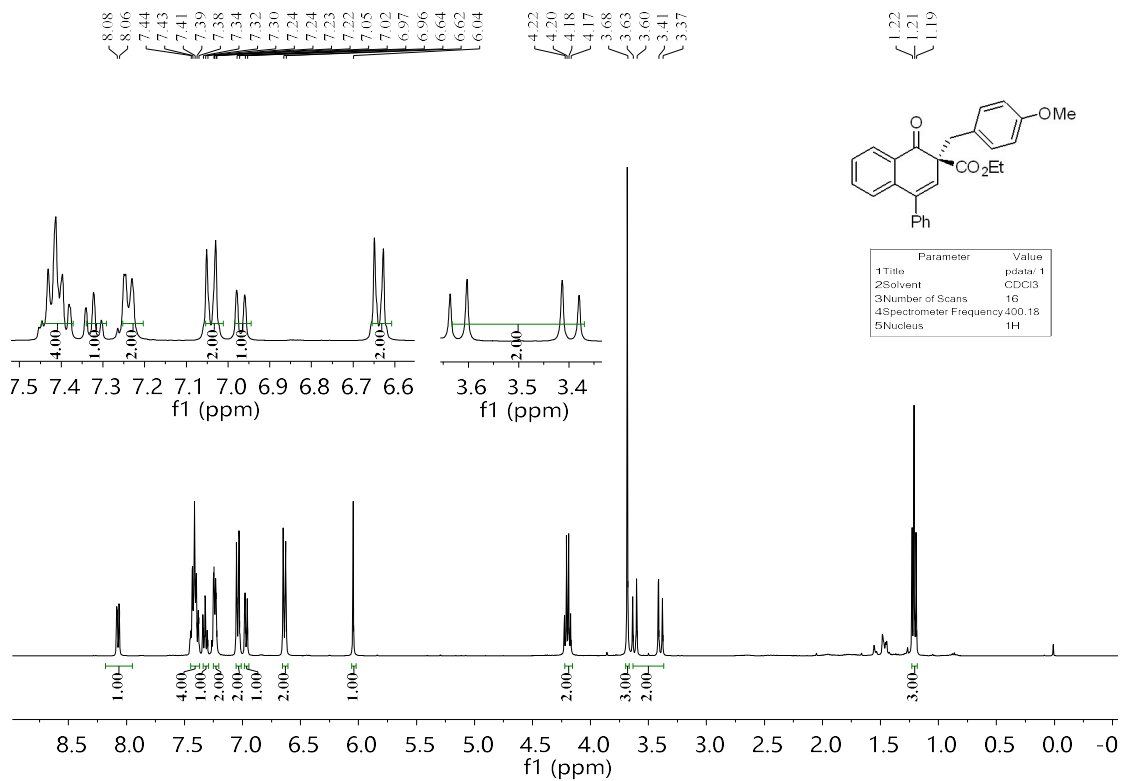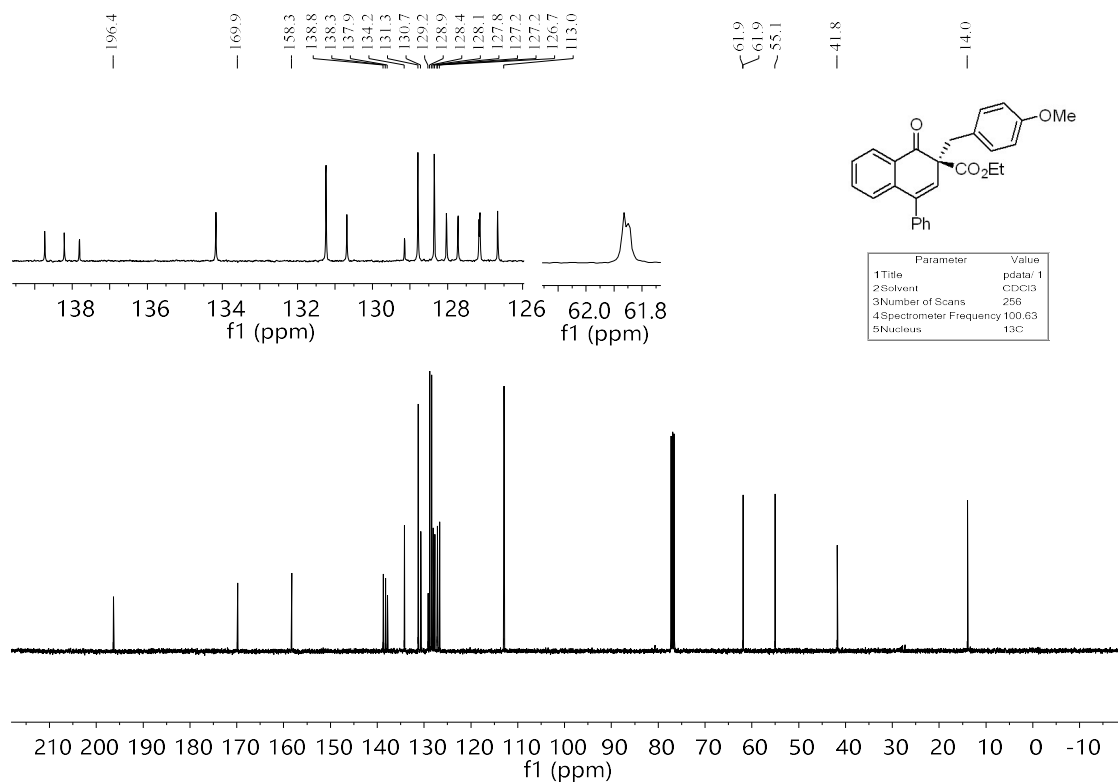

**Methyl (S)-2-(4-methoxybenzyl)-1-oxo-4-phenyl-1,2-dihydronaphthalene-2-carboxylate (B2)**

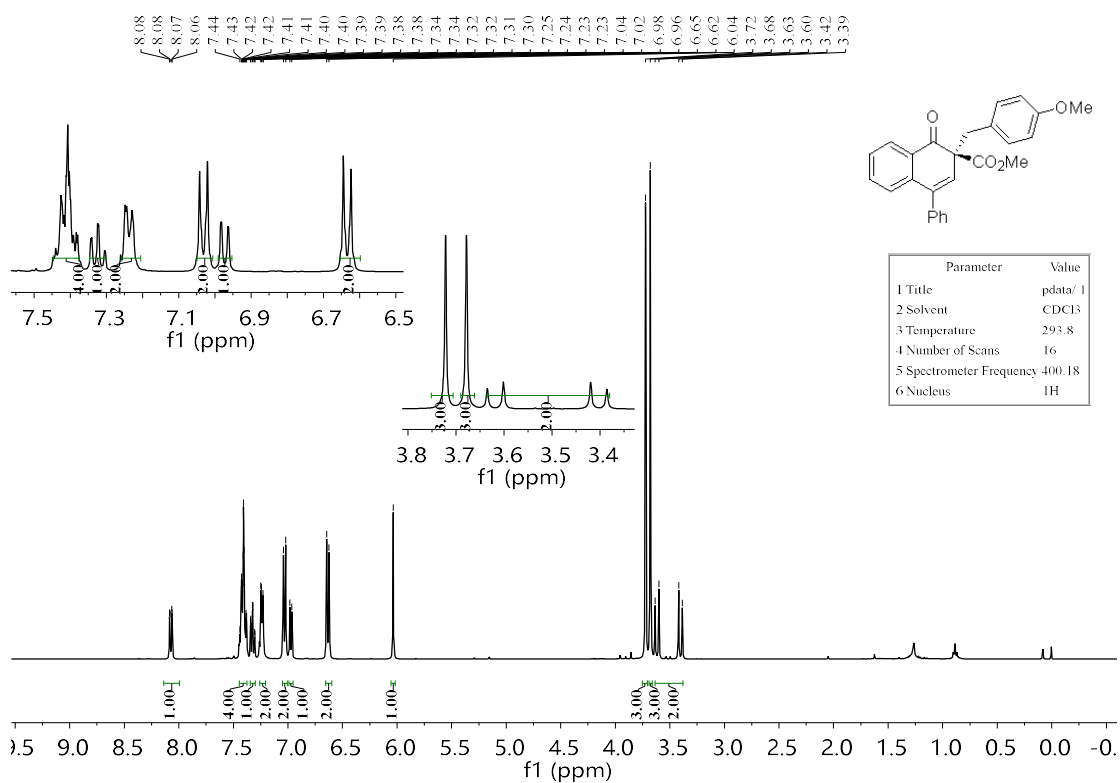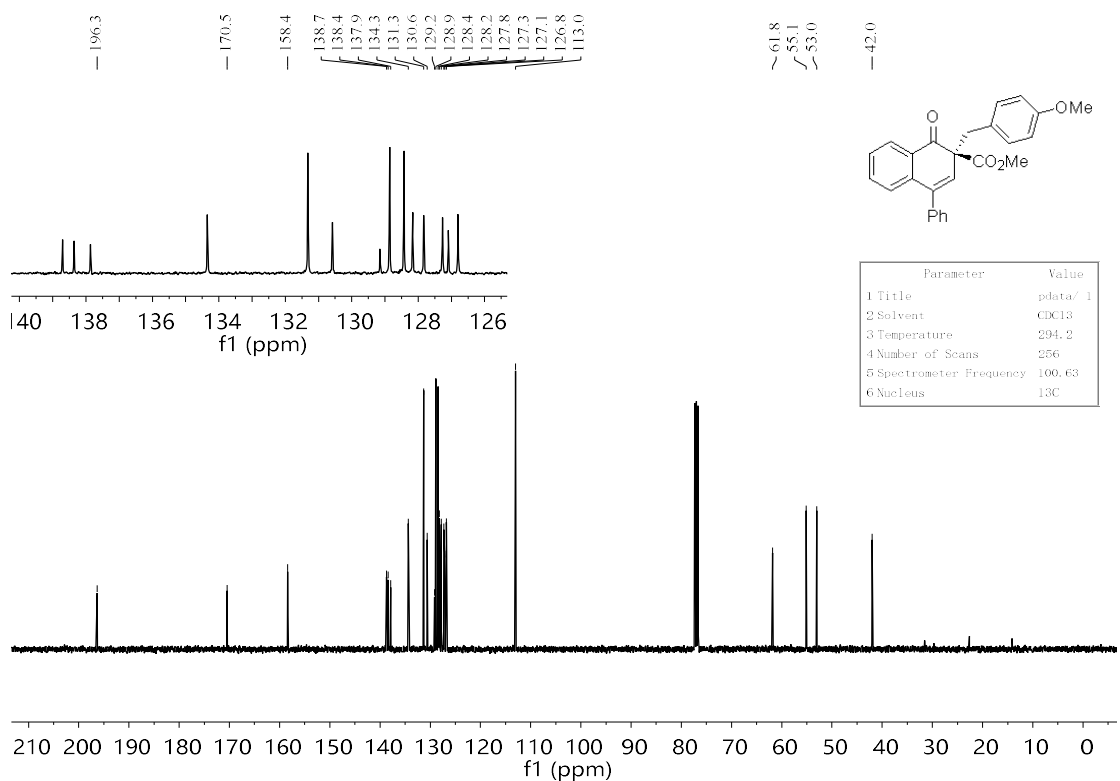



**Isopropyl (S)-2-(4-methoxybenzyl)-1-oxo-4-phenyl-1,2-dihydronaphthalene-2-carboxylate (B3)**

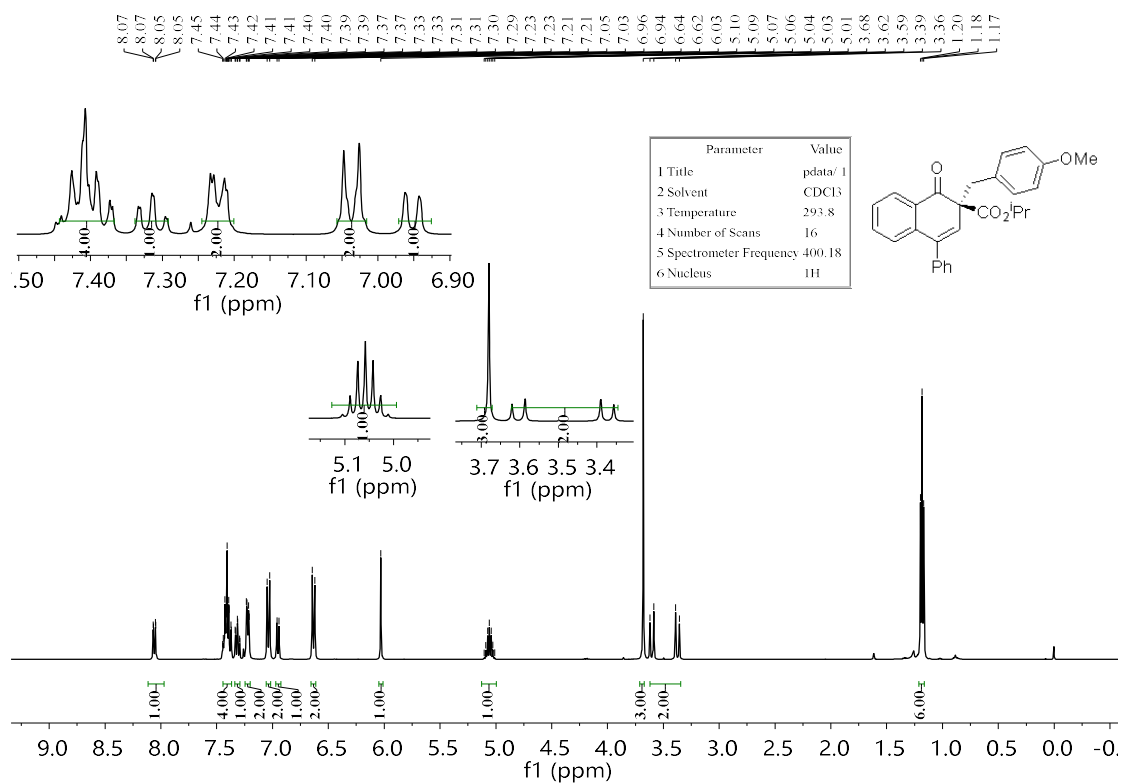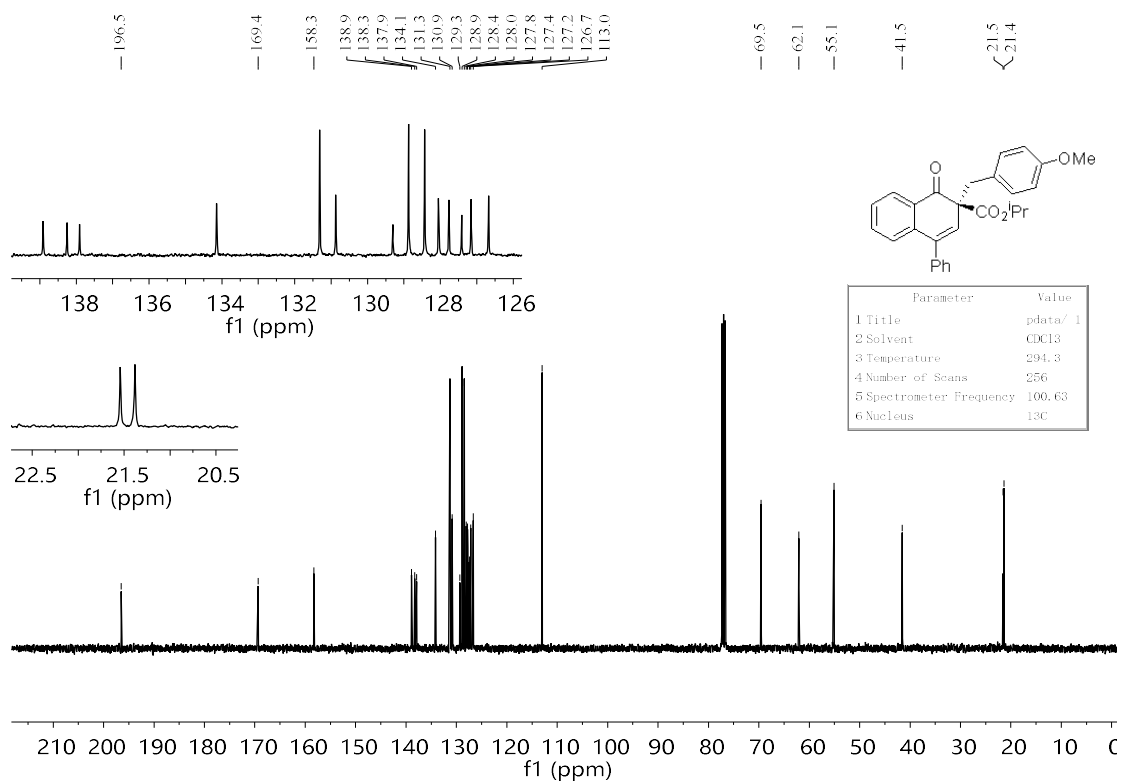

**Benzyl (S)-2-(4-methoxybenzyl)-1-oxo-4-phenyl-1,2-dihydronaphthalene-2-carboxylate (B4)**

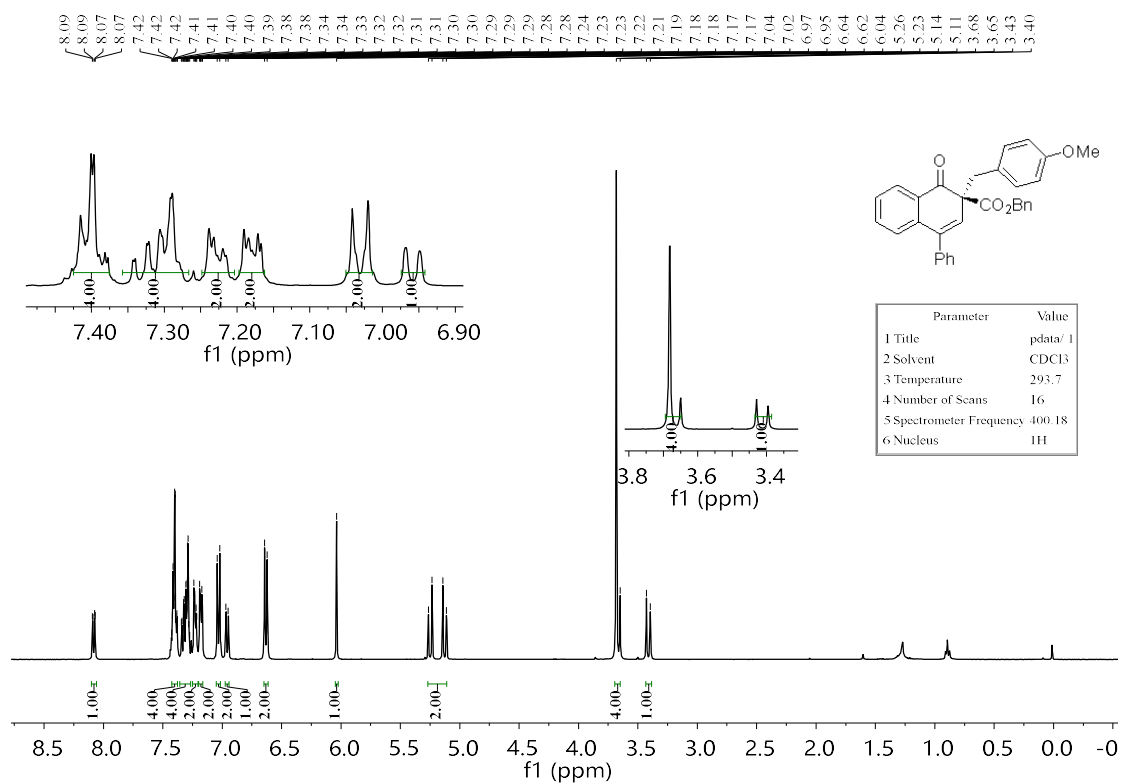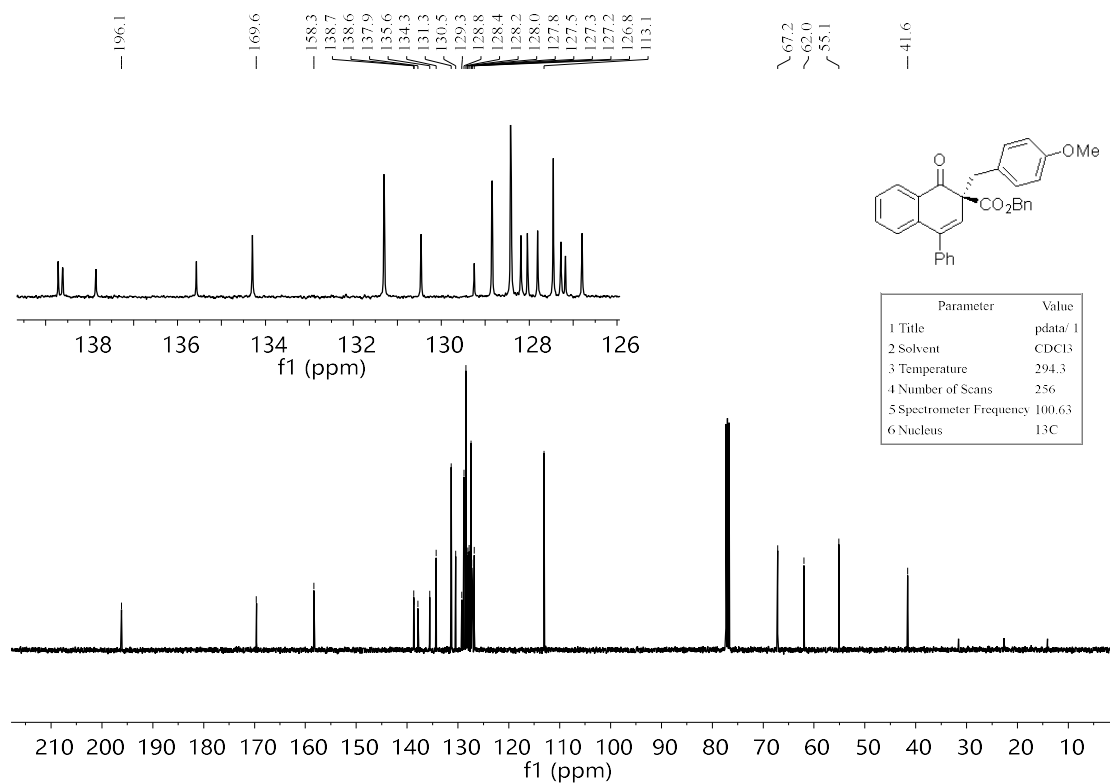

**Adamantan-1-yl (S)-2-(4-methoxybenzyl)-1-oxo-4-phenyl-1,2-dihydronaphthalene-2-carboxylate (B5)**

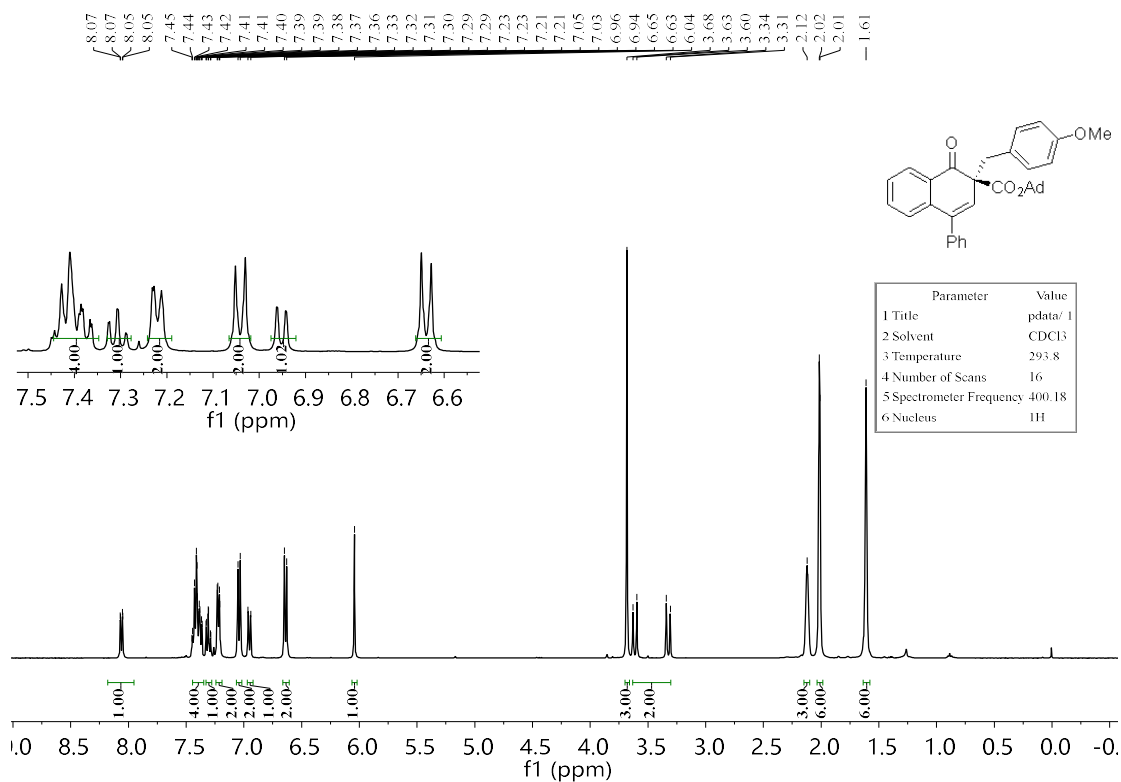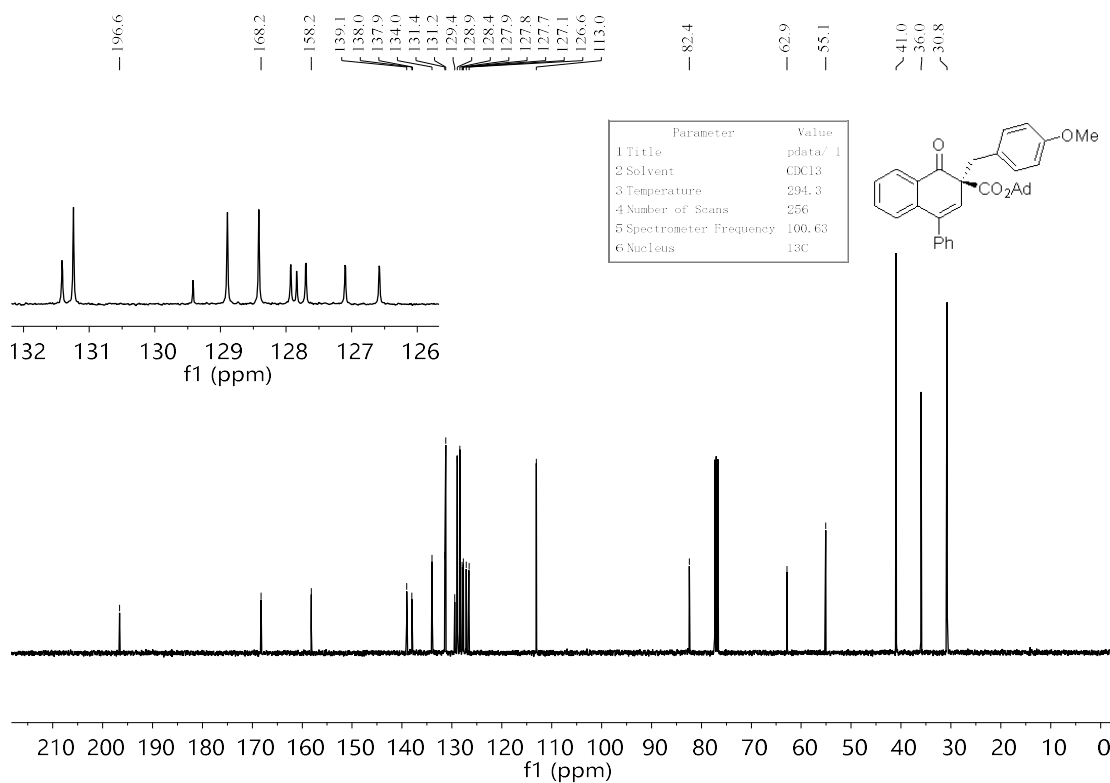

**Diethyl (S)-(2-(4-methoxybenzyl)-1-oxo-4-phenyl-1,2-dihydronaphthalen-2-yl)phosphonate (B6)**

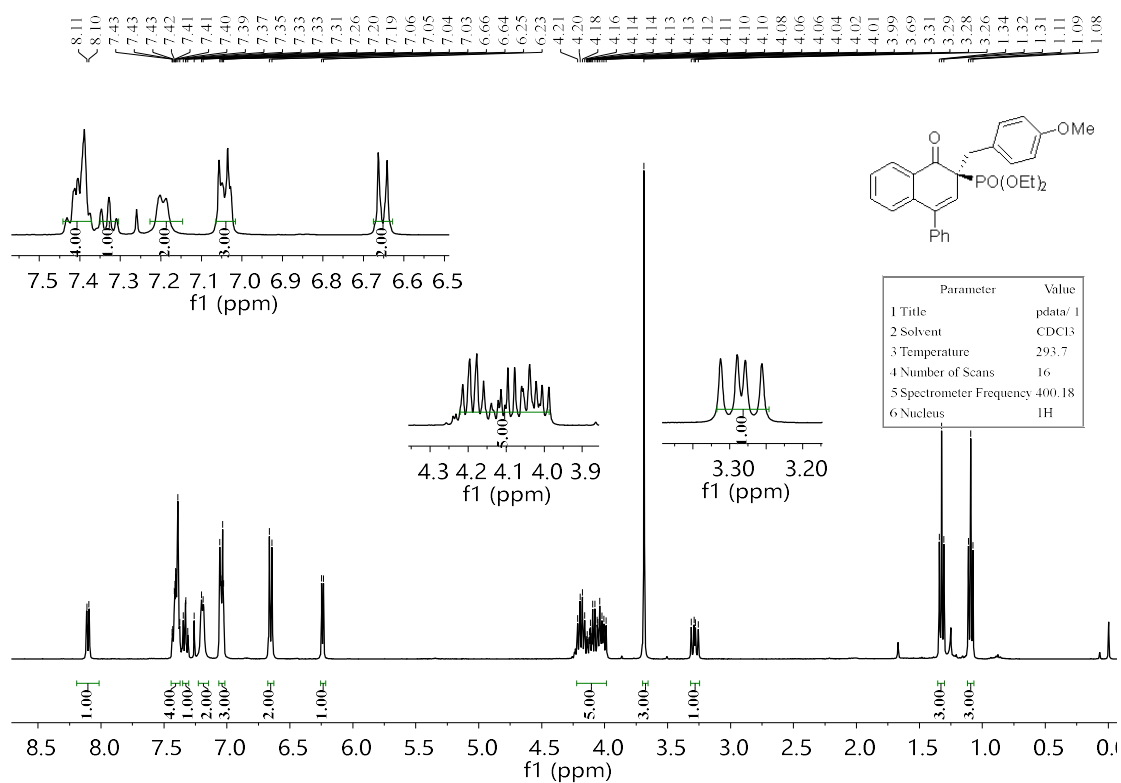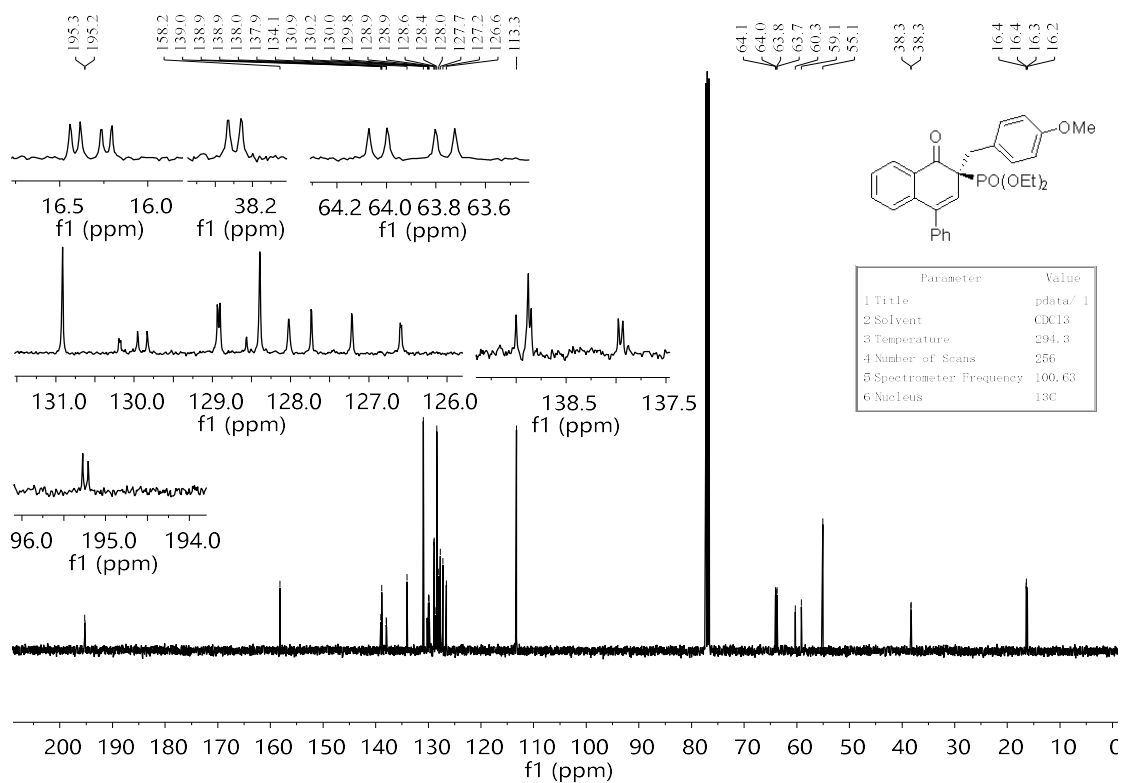

- 18.56

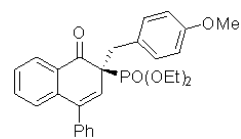

| Parameter                | Value    |
|--------------------------|----------|
| 1 Title                  | pdata/ 1 |
| 2 Solvent                | CDCl3    |
| 3 Temperature            | 294.1    |
| 4 Number of Scans        | 16       |
| 5 Spectrometer Frequency | 162.00   |
| 6 Nucleus                | 31P      |

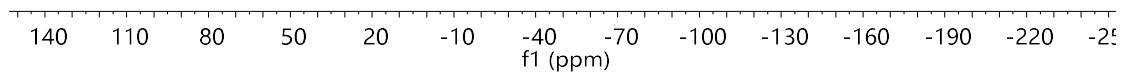

**(R)-2-acetyl-2-(4-methoxybenzyl)-4-phenylnaphthalen-1(2H)-one (B7)**

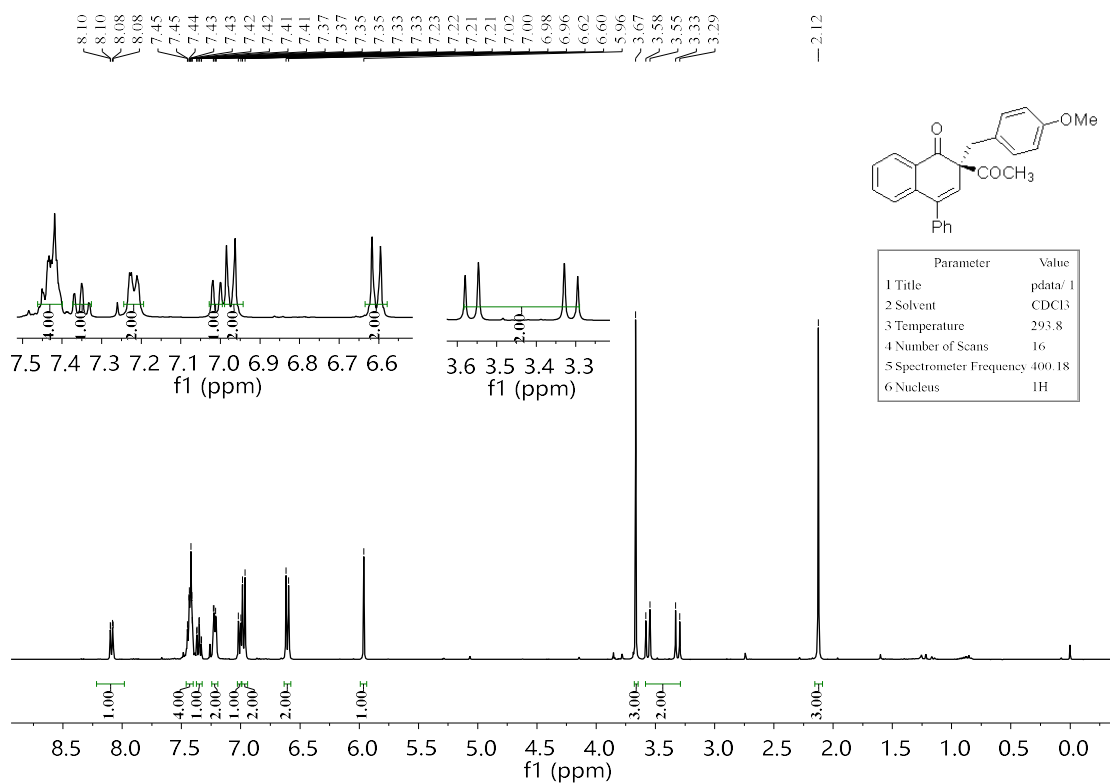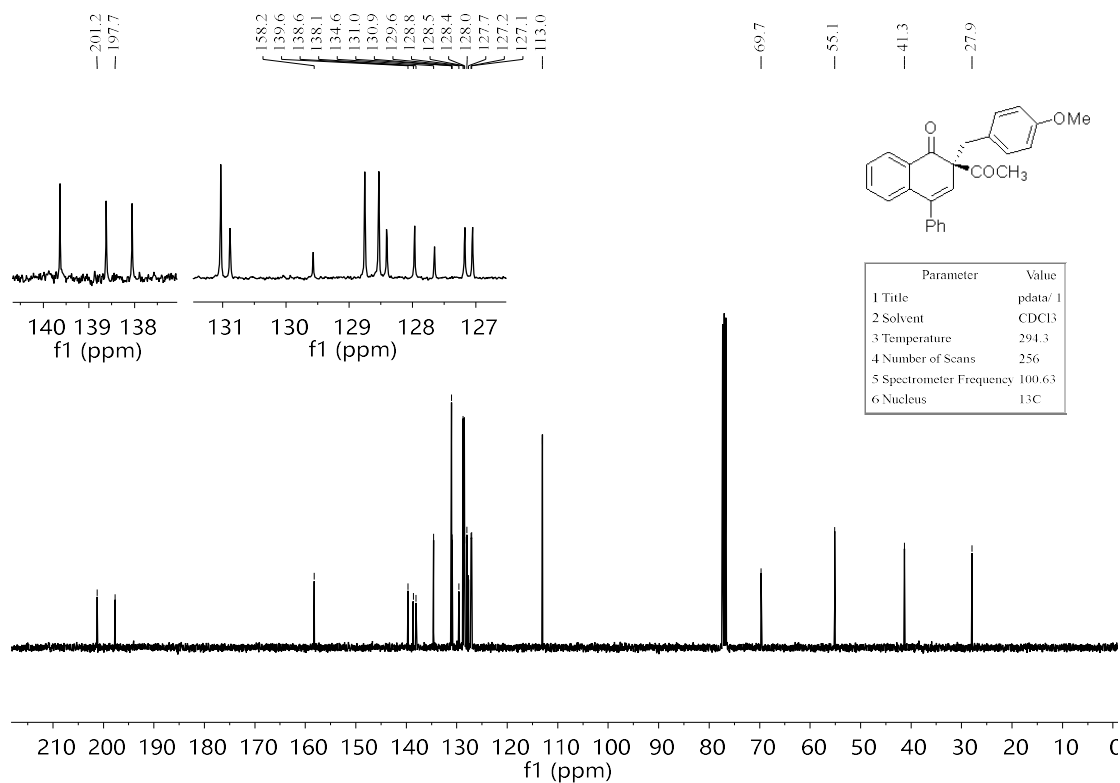

**Diethyl (S)-2-(4-methoxybenzyl)-1-oxo-4-phenyl-1,2-dihydronaphthalene-2,3-dicarboxylate (B8)**

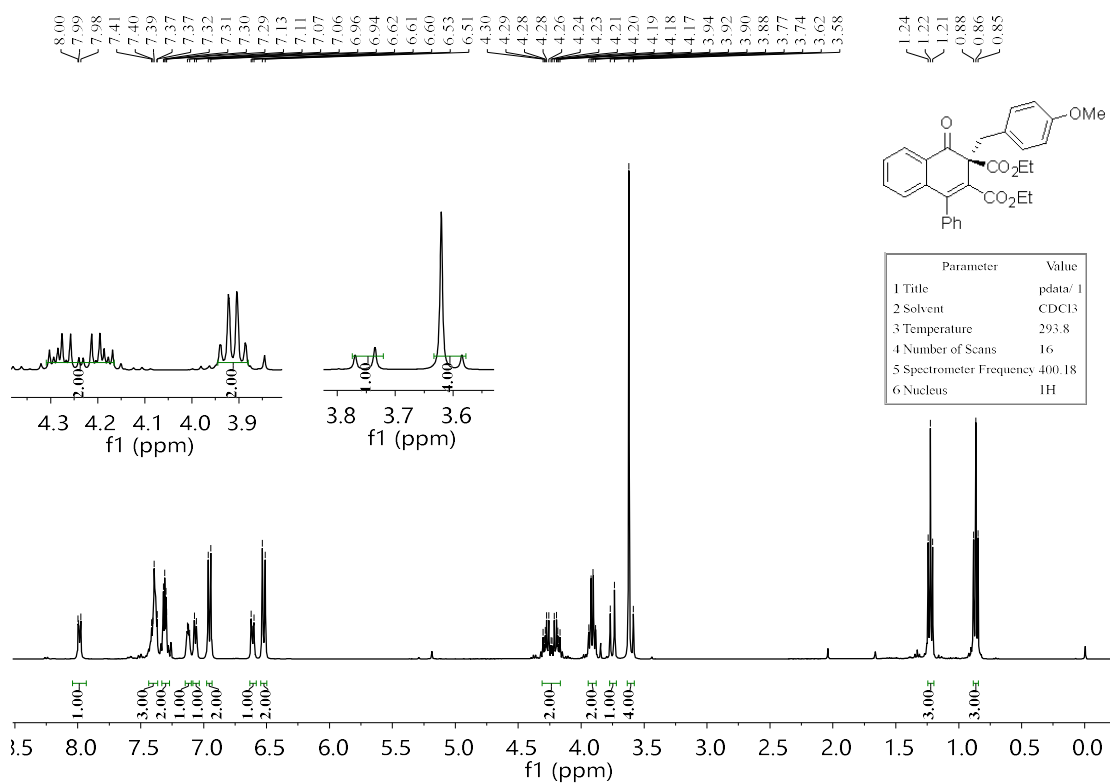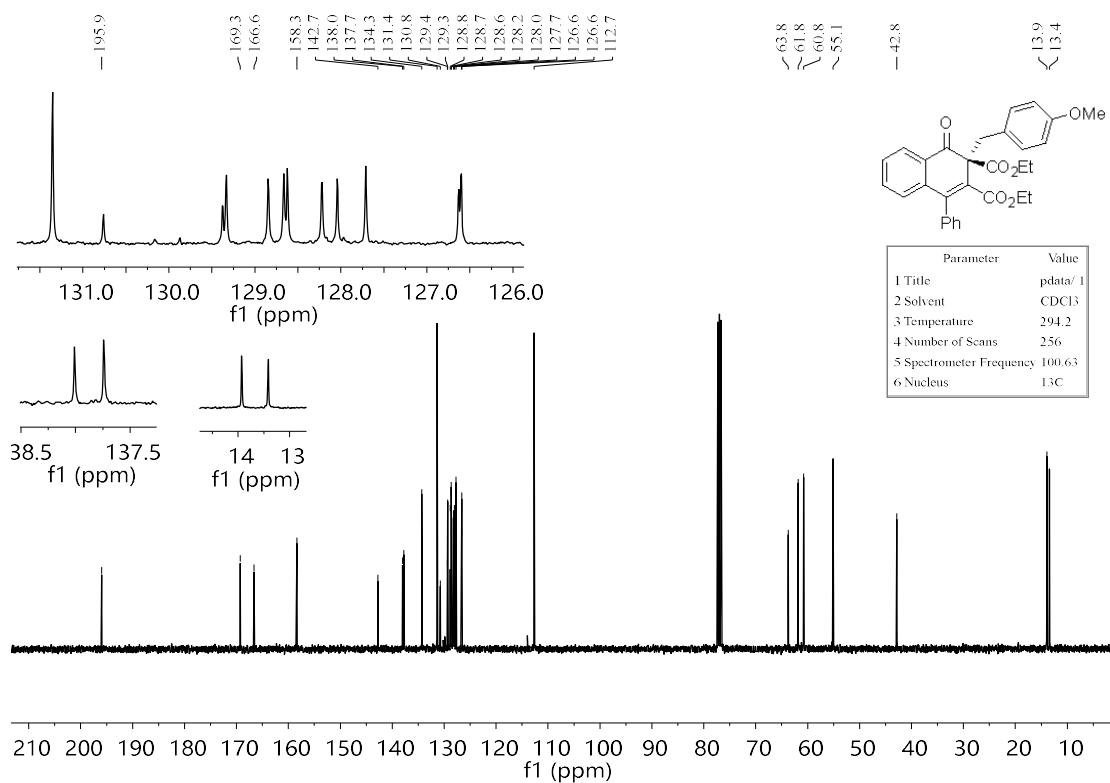

**Ethyl (S)-2-(4-methoxybenzyl)-1-oxo-3,4-diphenyl-1,2-dihydronaphthalene-2-carboxylate (B9)**

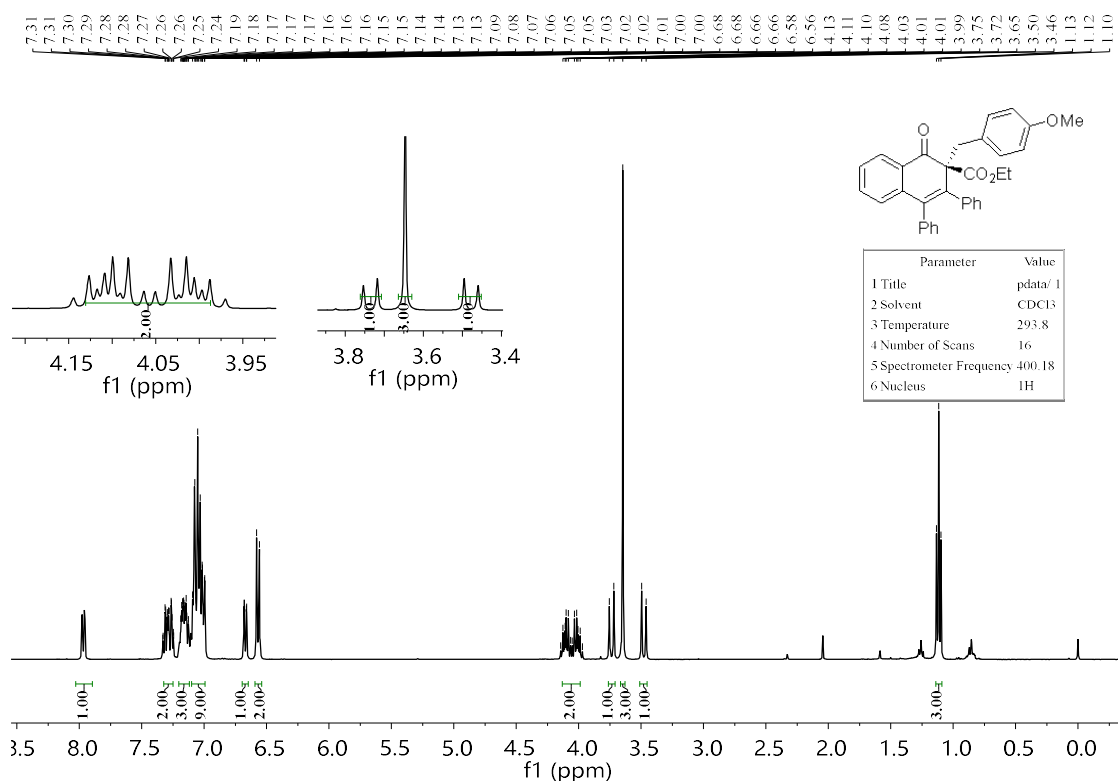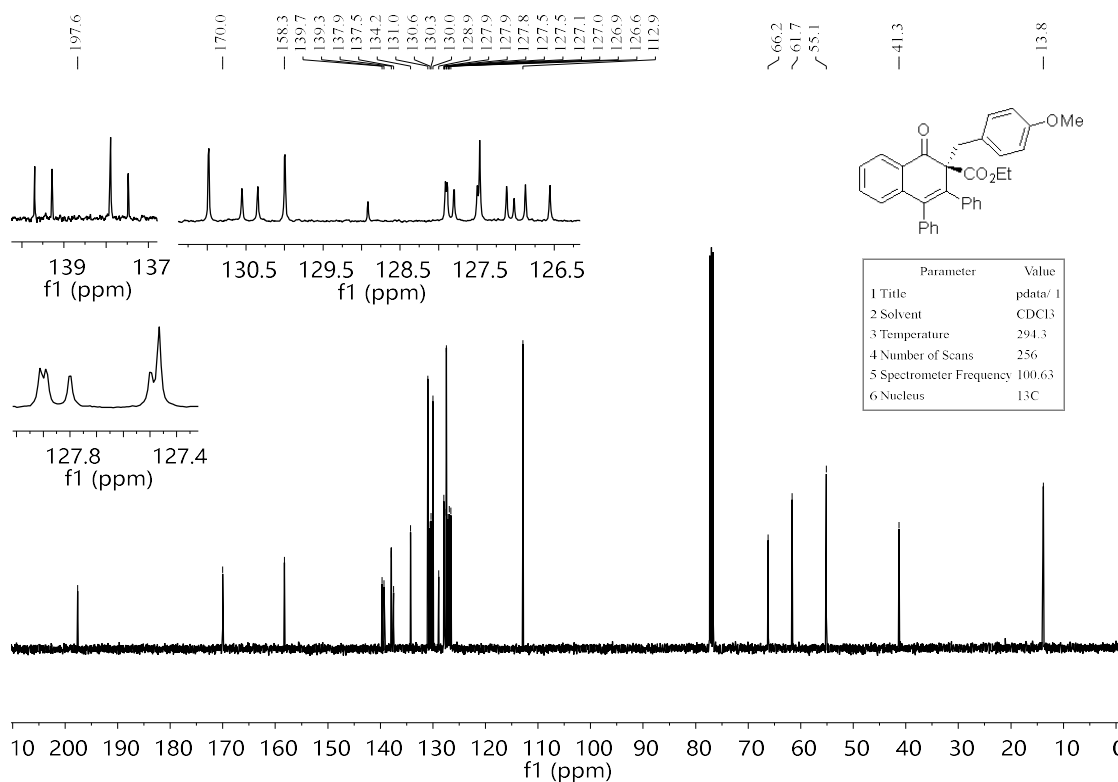



**Ethyl (S)-2-(4-methoxybenzyl)-1-oxo-1,2-dihydronaphthalene-2-carboxylate (B10)**

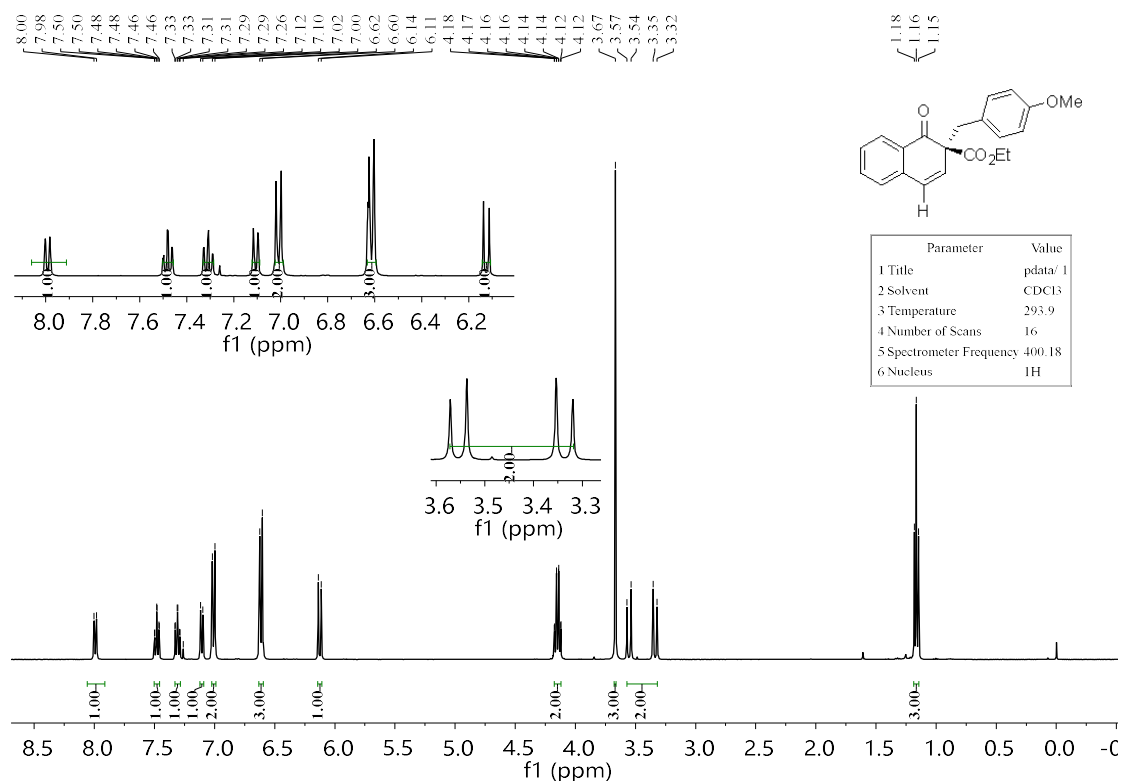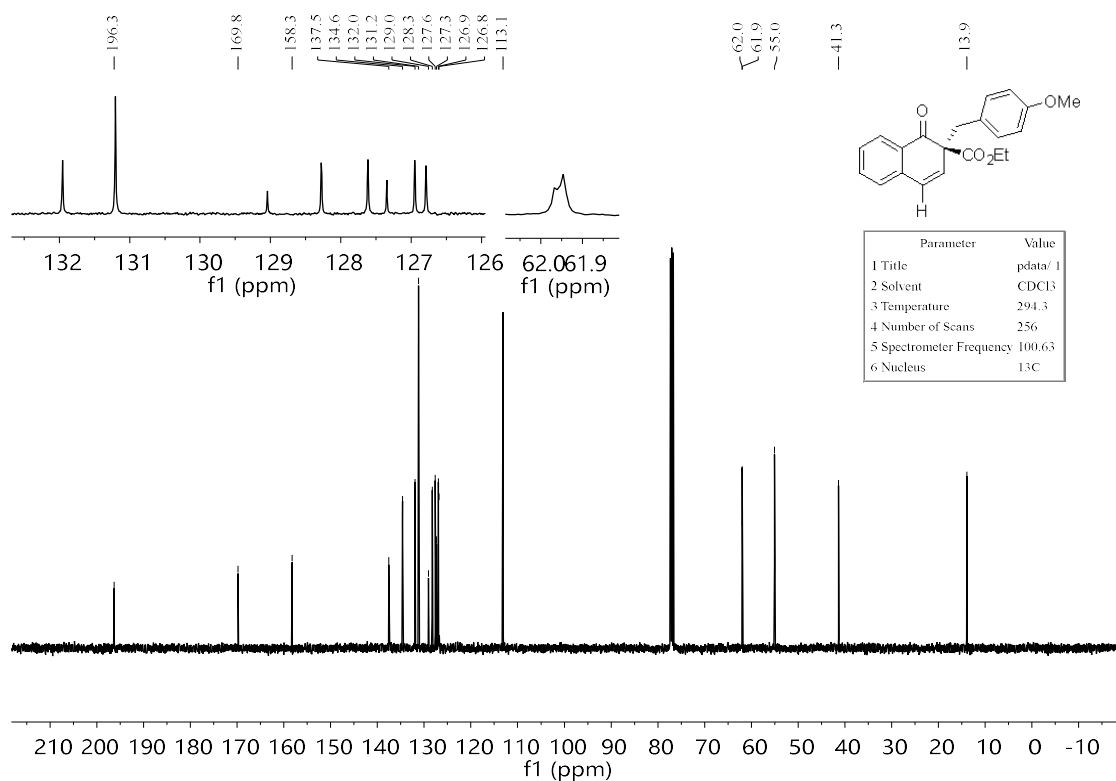

ethyl 1-hydroxy-4-(4-methoxybenzyl)-2-naphthoate (B10')

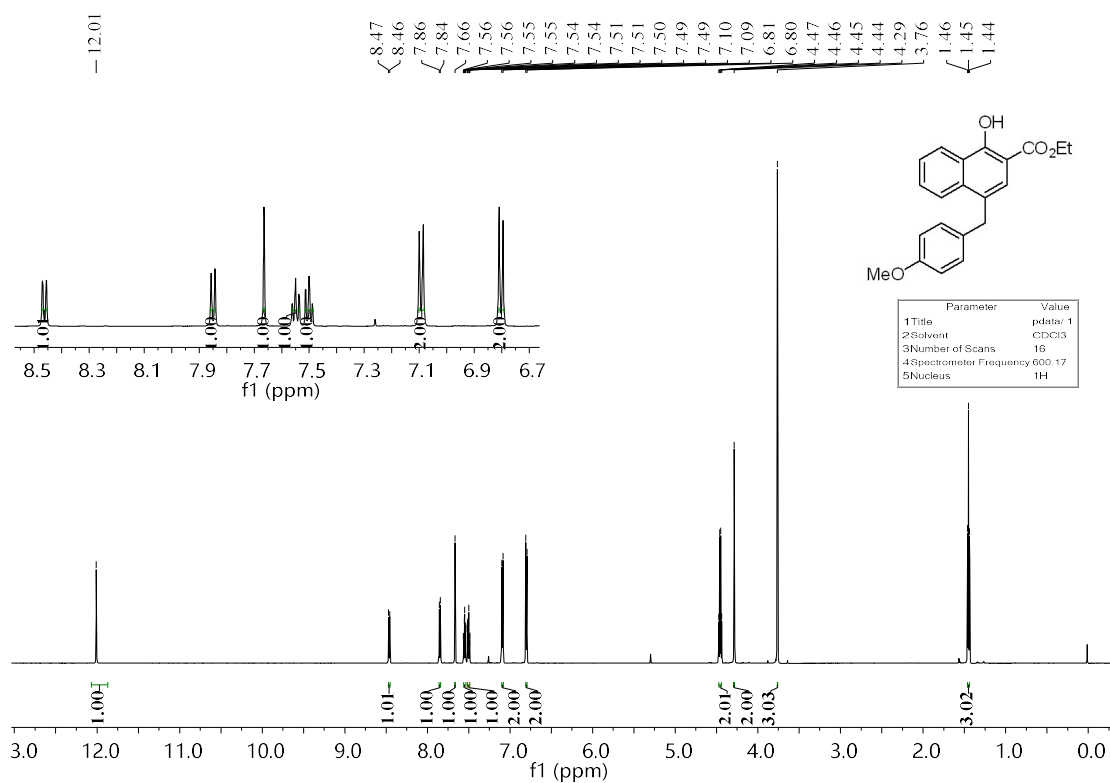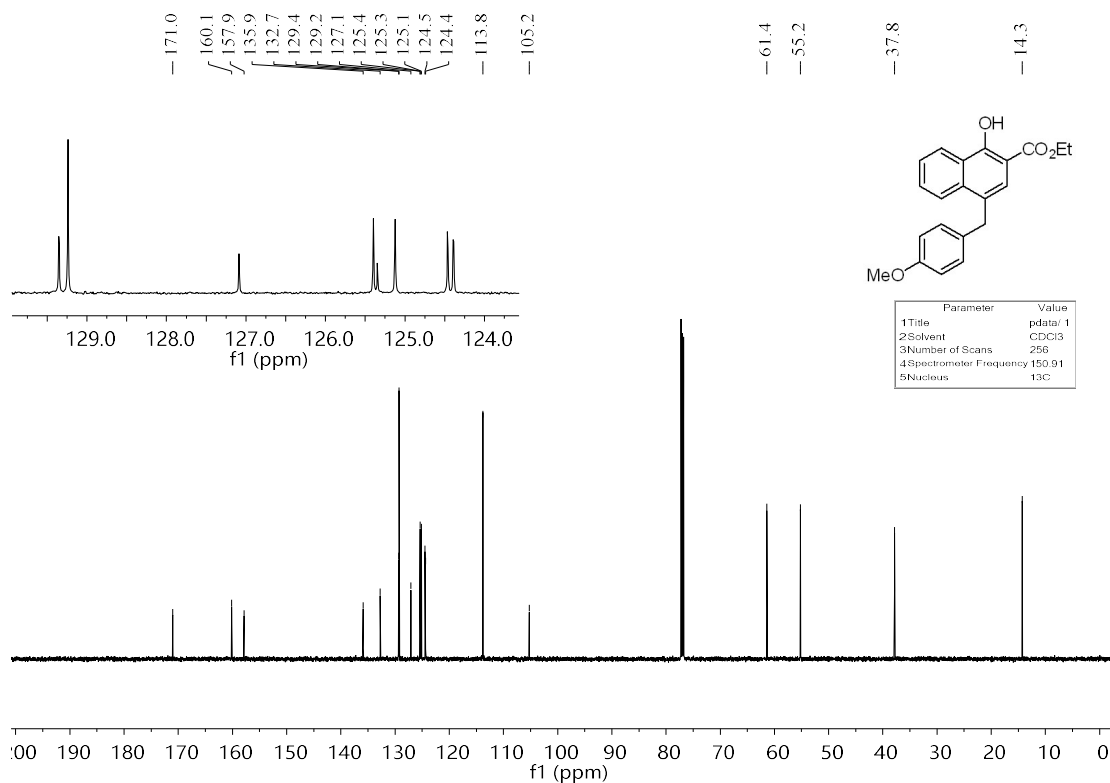

**Ethyl (S)-4-chloro-2-(4-methoxybenzyl)-1-oxo-1,2-dihydronaphthalene-2-carboxylate (B11)**

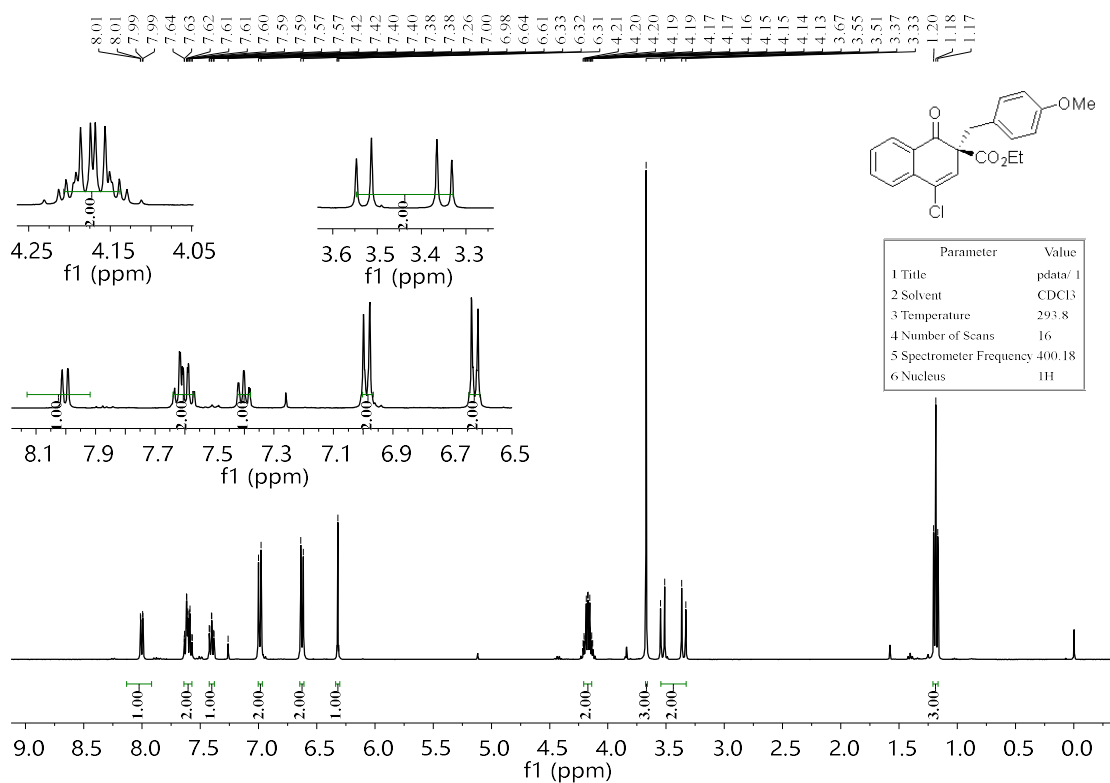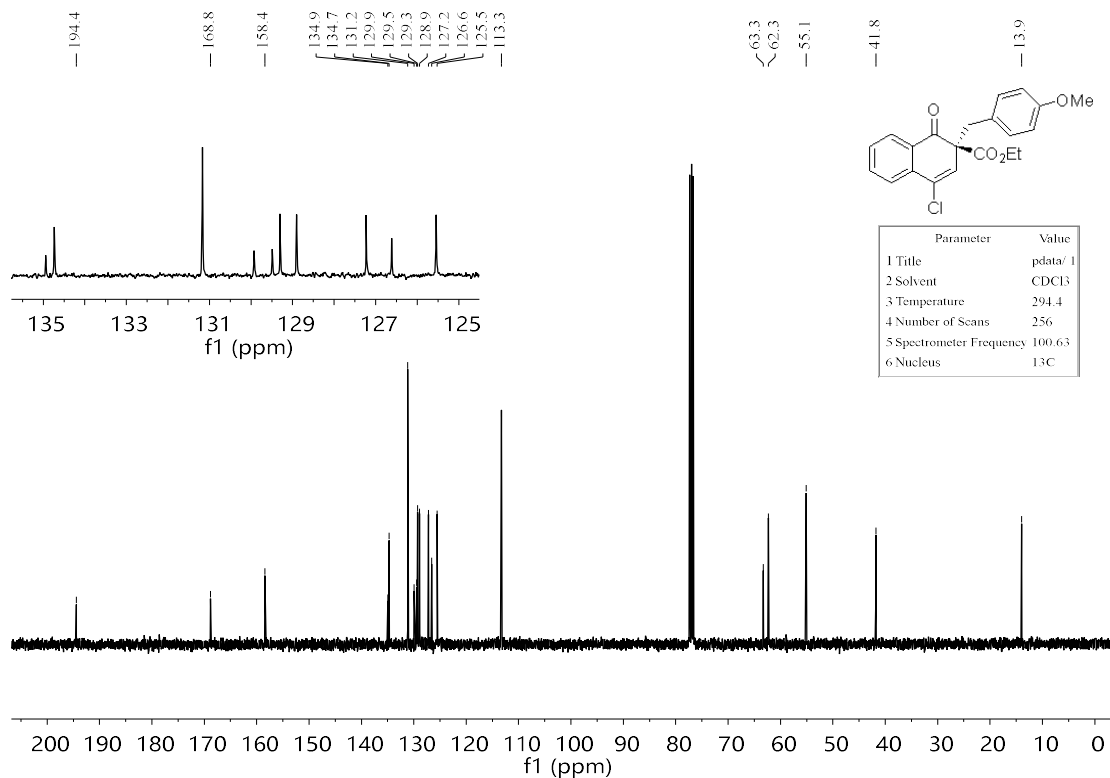

**Ethyl (S)-4-bromo-2-(4-methoxybenzyl)-1-oxo-1,2-dihydronaphthalene-2-carboxylate (B12)**

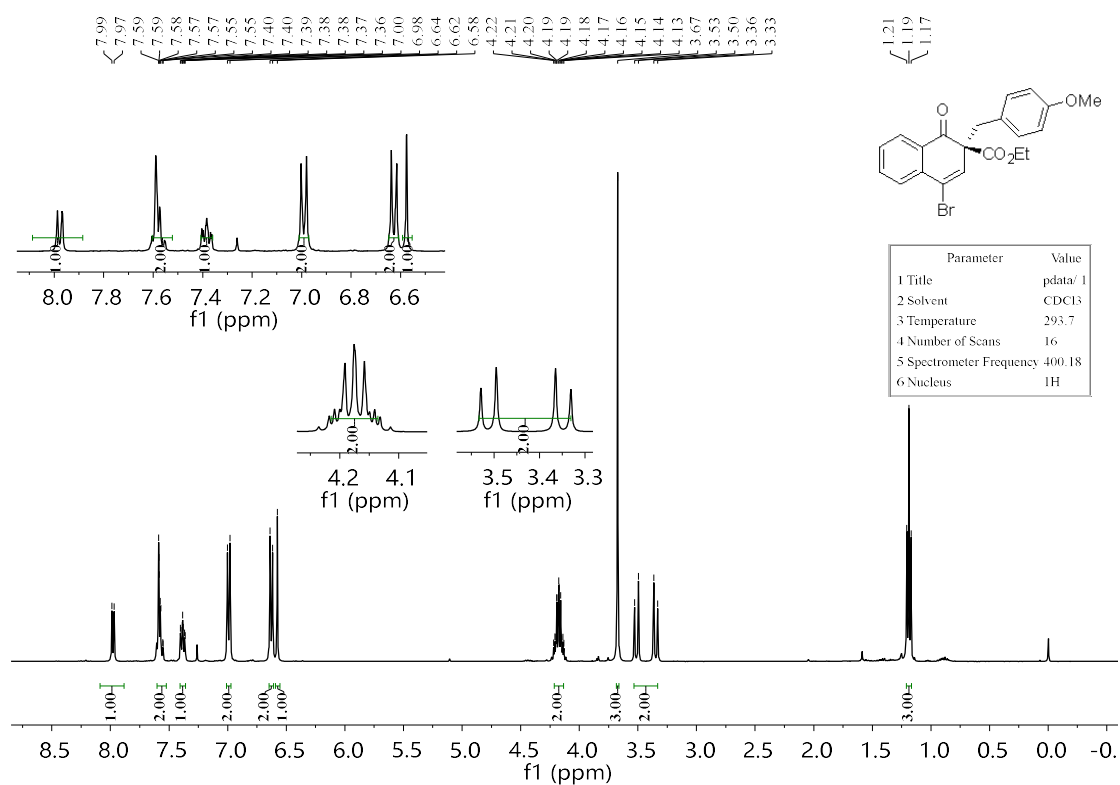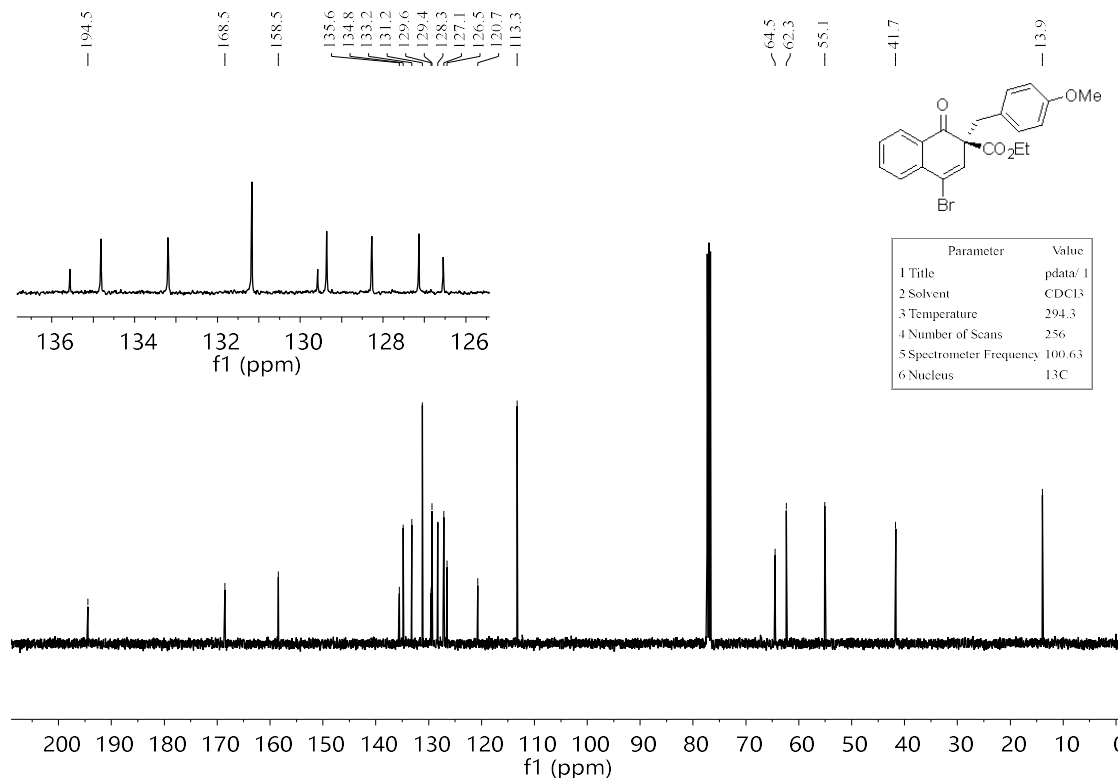

**Ethyl (S)-2-(4-methoxybenzyl)-4-(4-methoxyphenyl)-1-oxo-1,2-dihydronaphthalene-2-carboxylate (B13)**

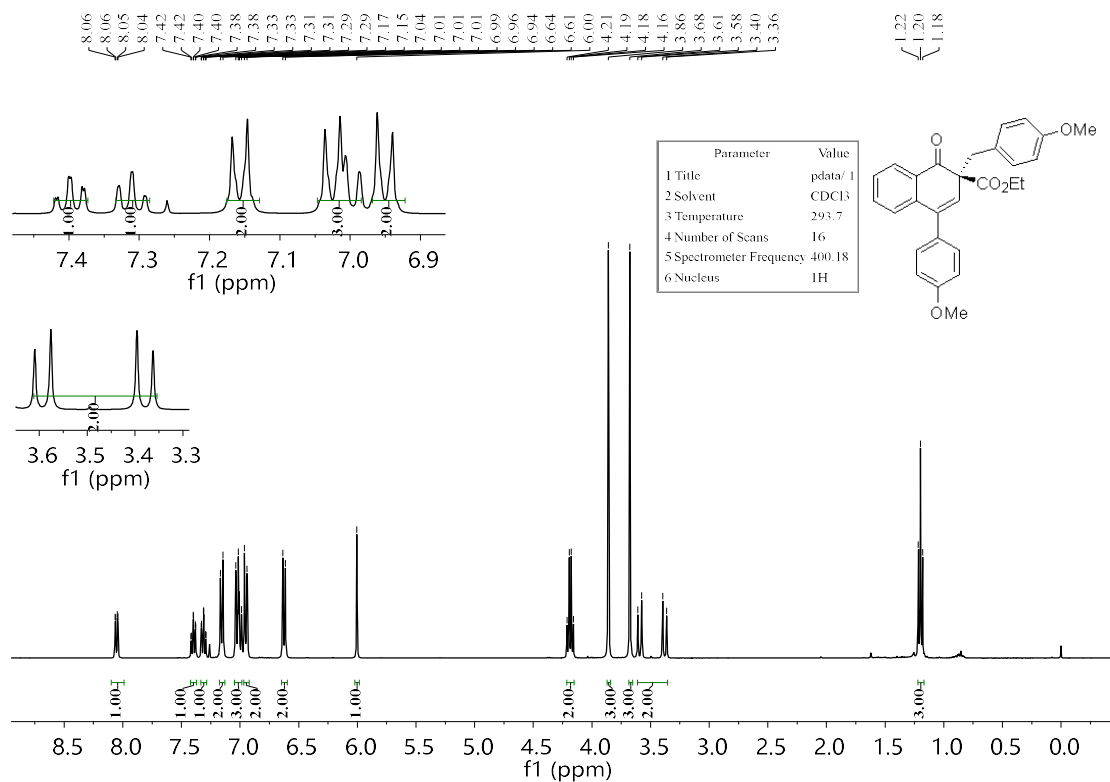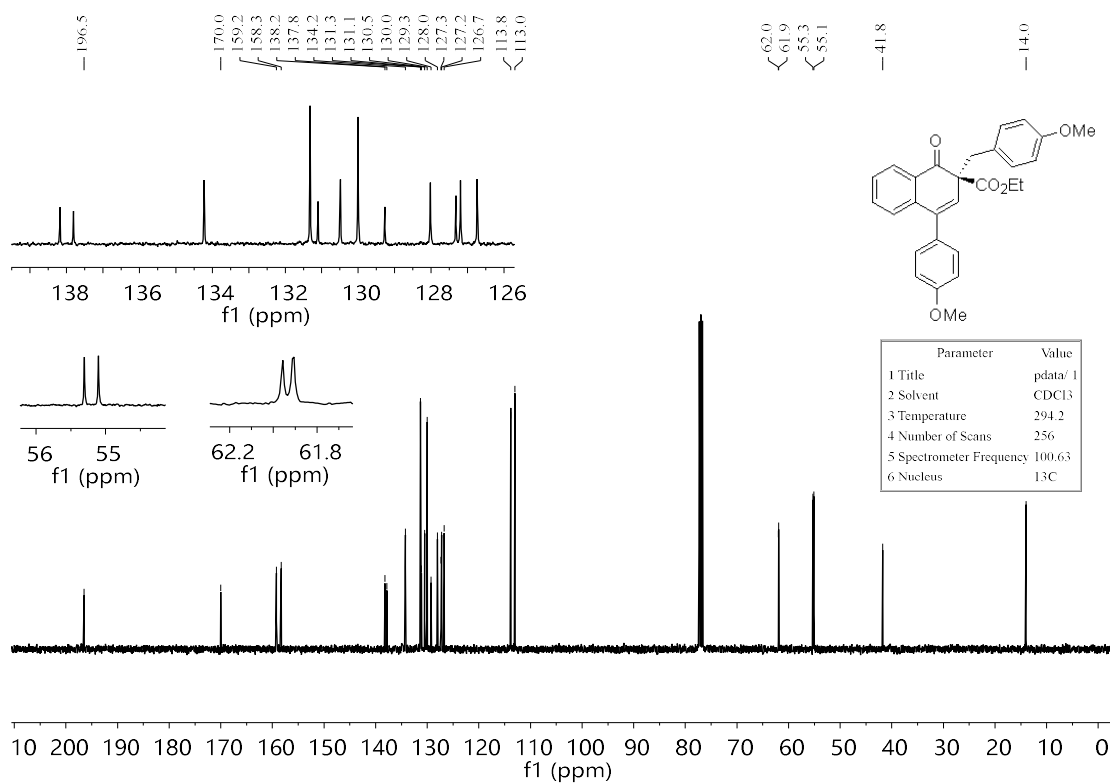

**Ethyl (S)-4-(4-bromophenyl)-2-(4-methoxybenzyl)-1-oxo-1,2-dihydronaphthalene-2-carboxylate (B14)**

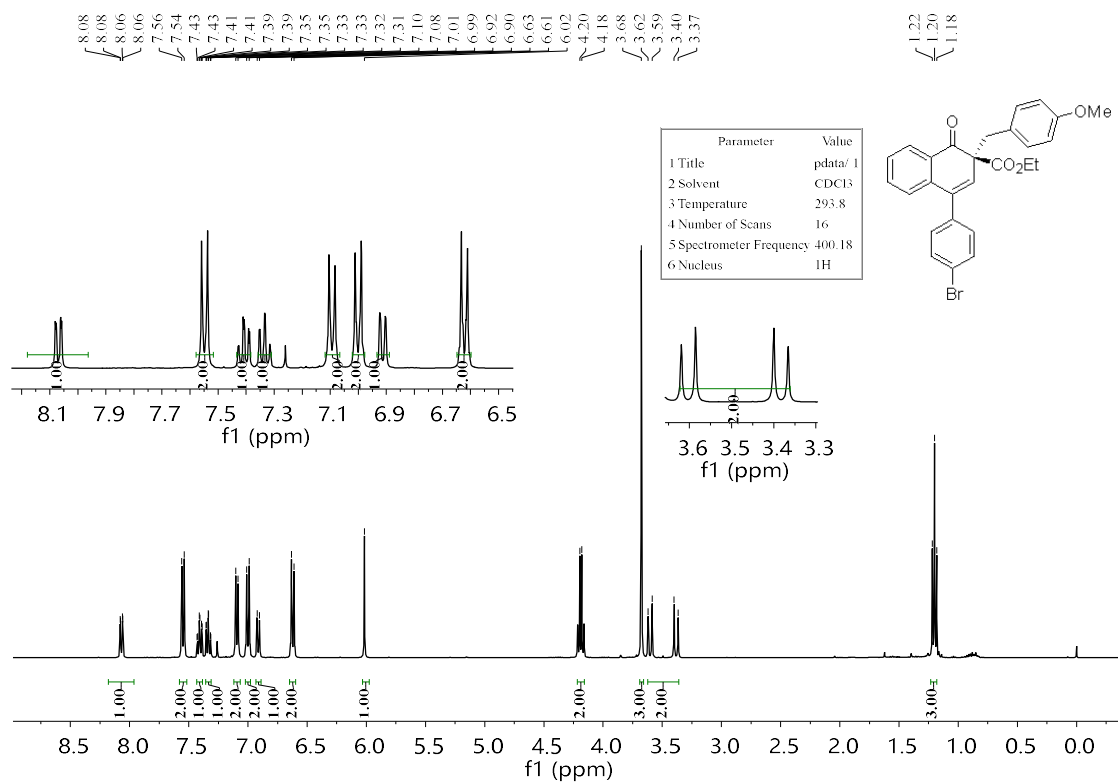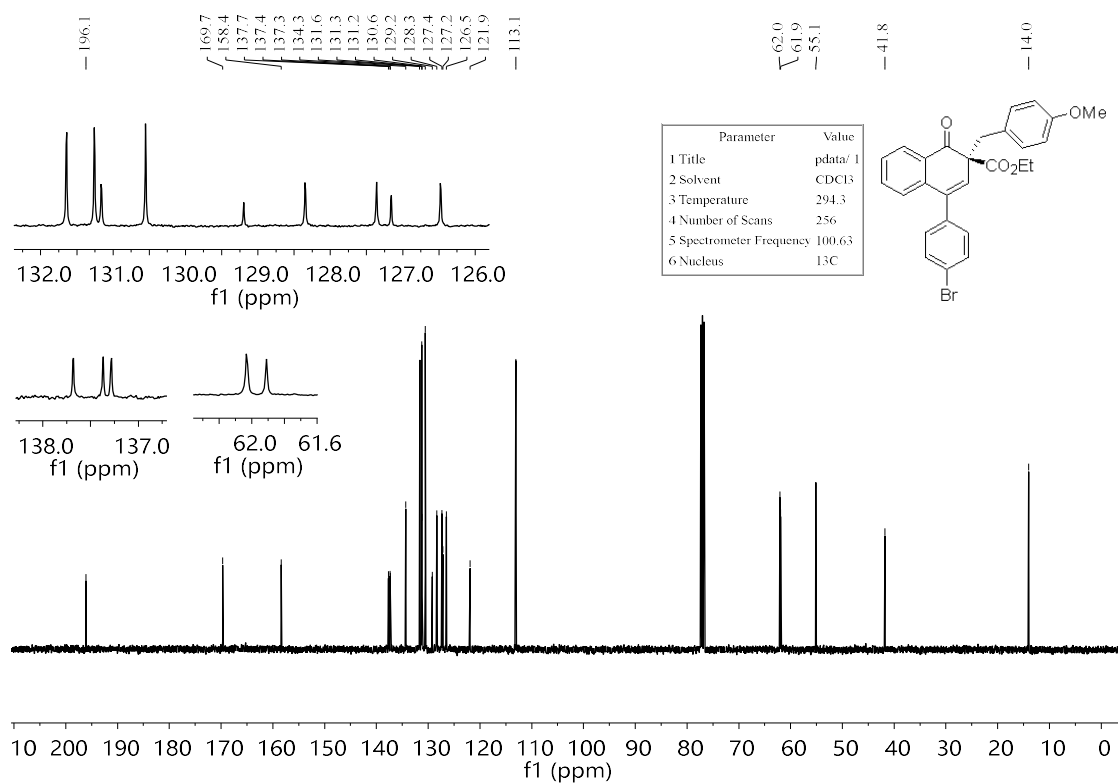

**Ethyl (S)-2-(4-methoxybenzyl)-1-oxo-4-(thiophen-2-yl)-1,2-dihydronaphthalene-2-carboxylate (B15)**

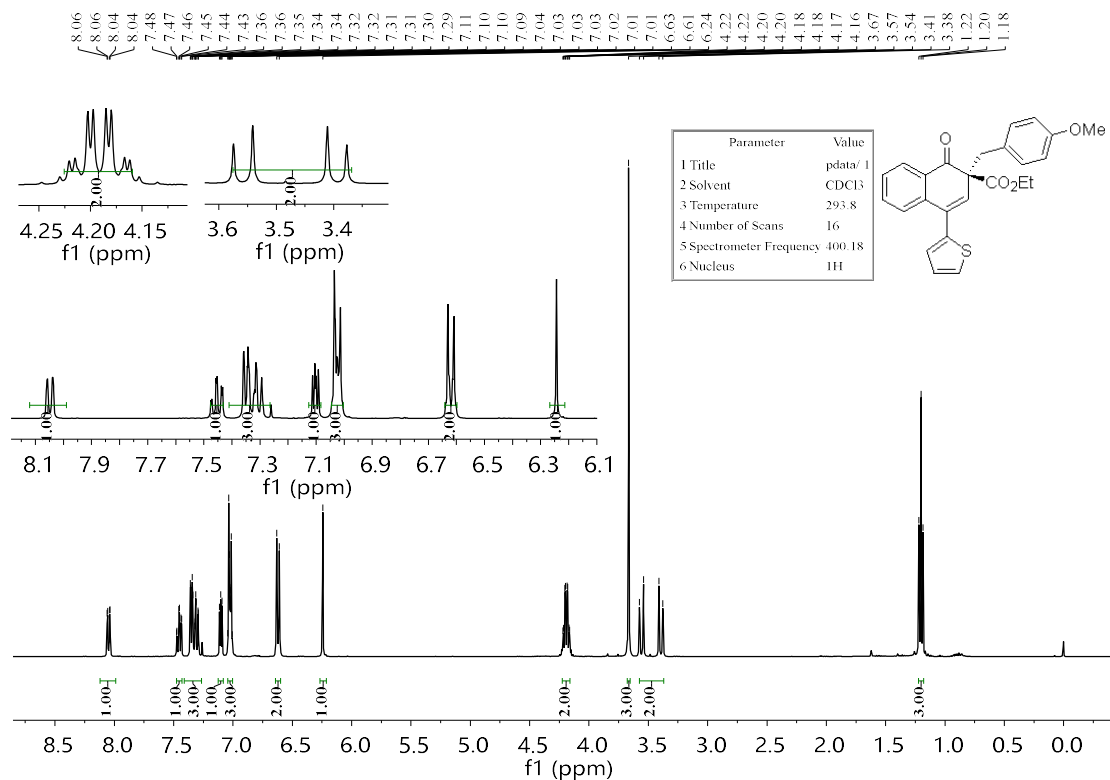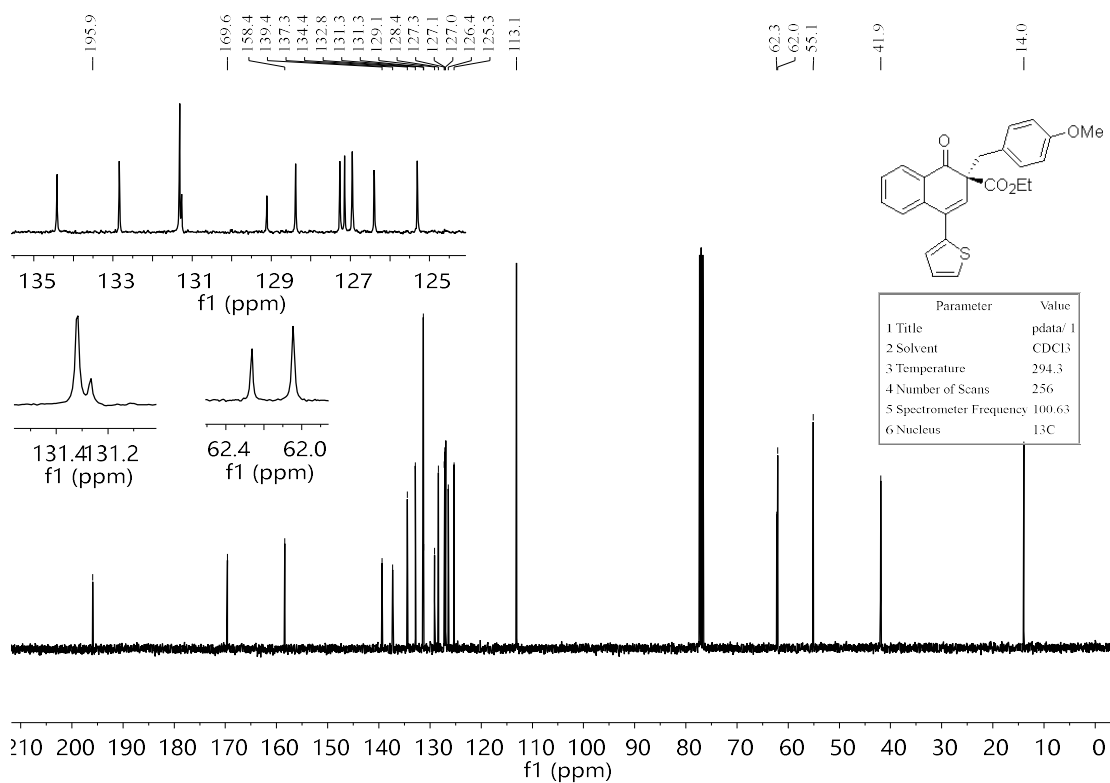

**Ethyl (S)-4-cyclopropyl-2-(4-methoxybenzyl)-1-oxo-1,2-dihydronaphthalene-2-carboxylate (B16)**

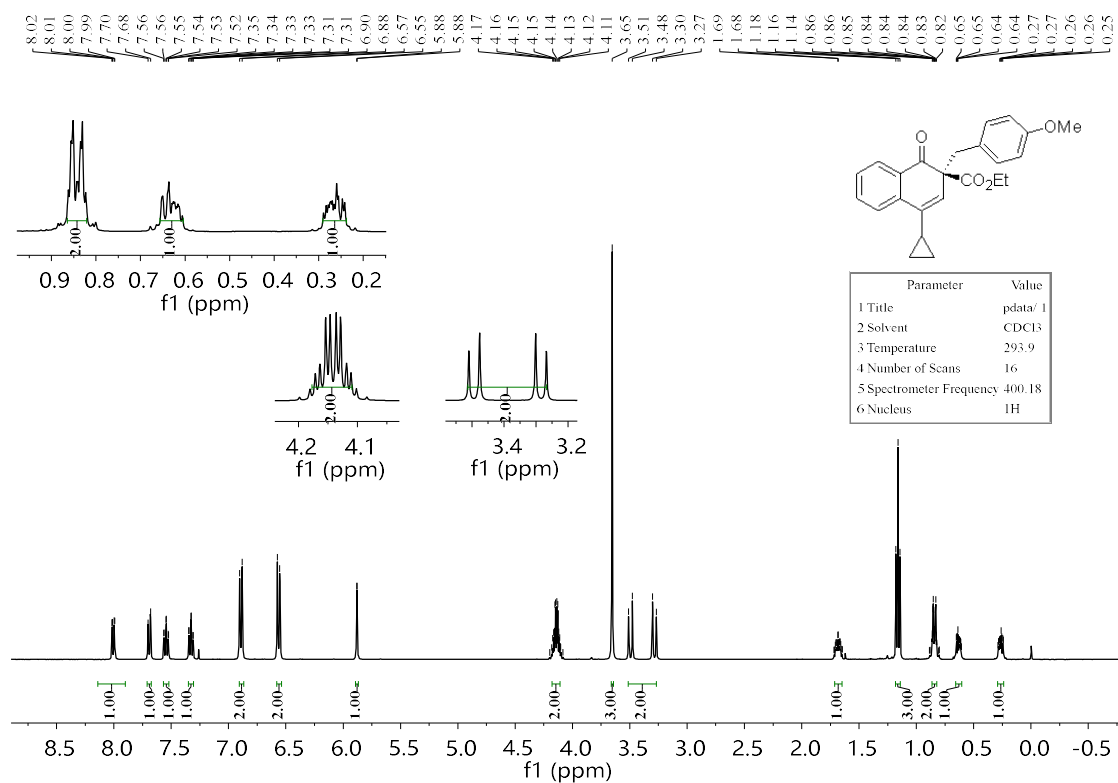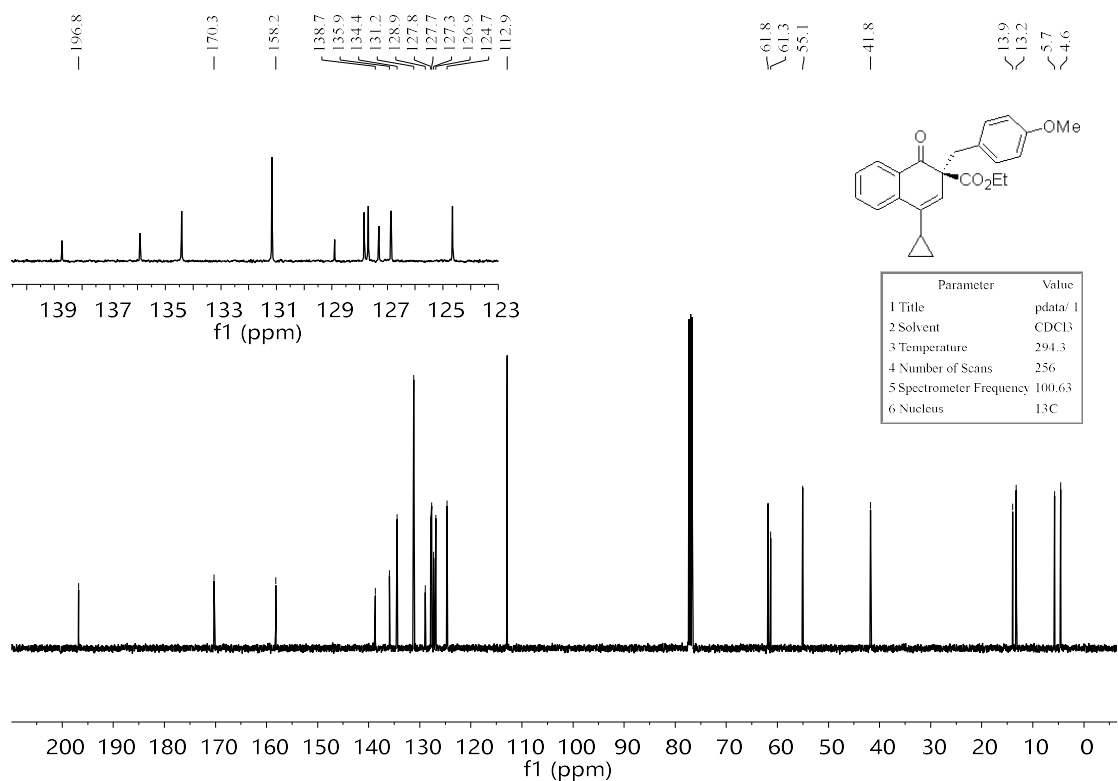



**ethyl (S)-2-(4-methoxybenzyl)-1-oxo-4-(3-phenylprop-2-yn-1-yl)-1,2-dihydronaphthalene-2-carboxylate (B17)**

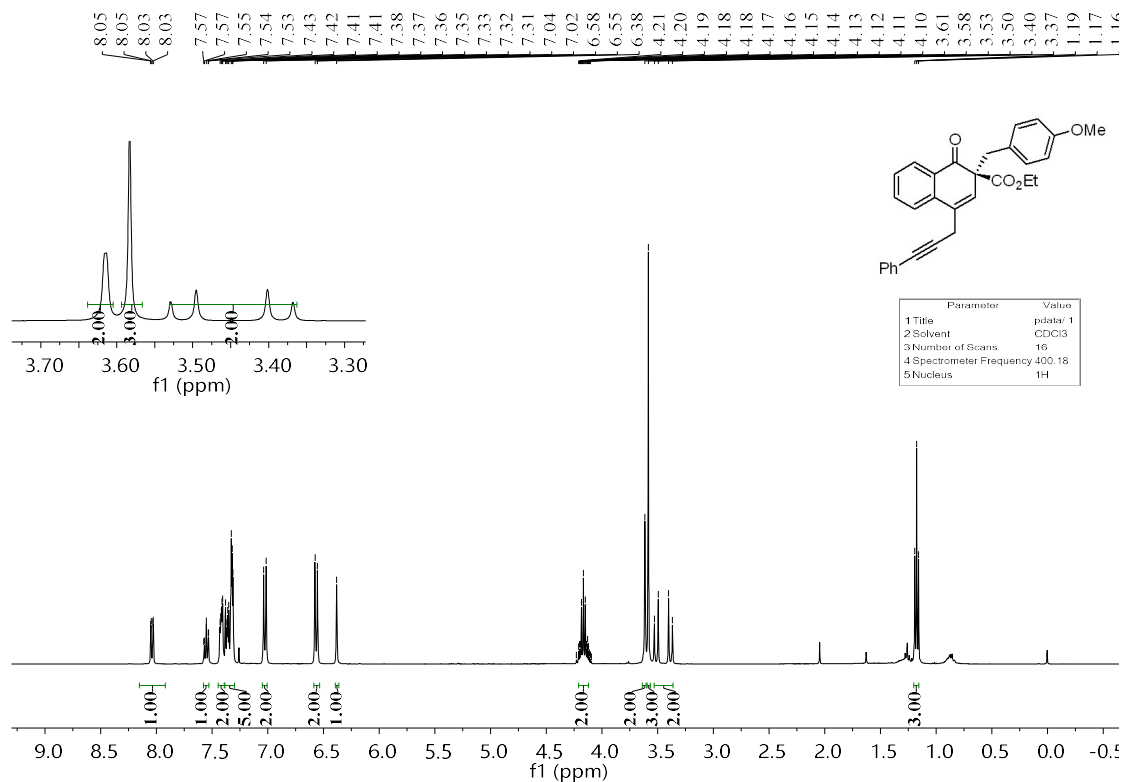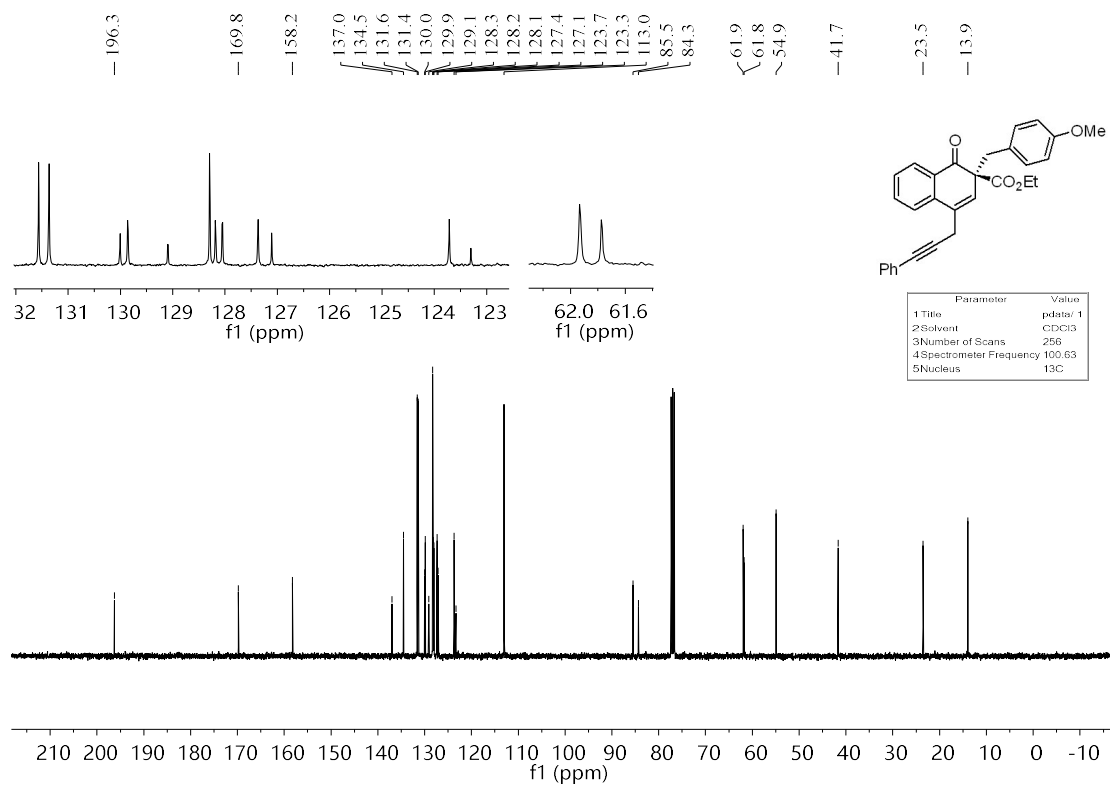

**Ethyl (S)-2-(4-methoxybenzyl)-6-methyl-1-oxo-4-phenyl-1,2-dihydronaphthalene-2-carboxylate (B18)**

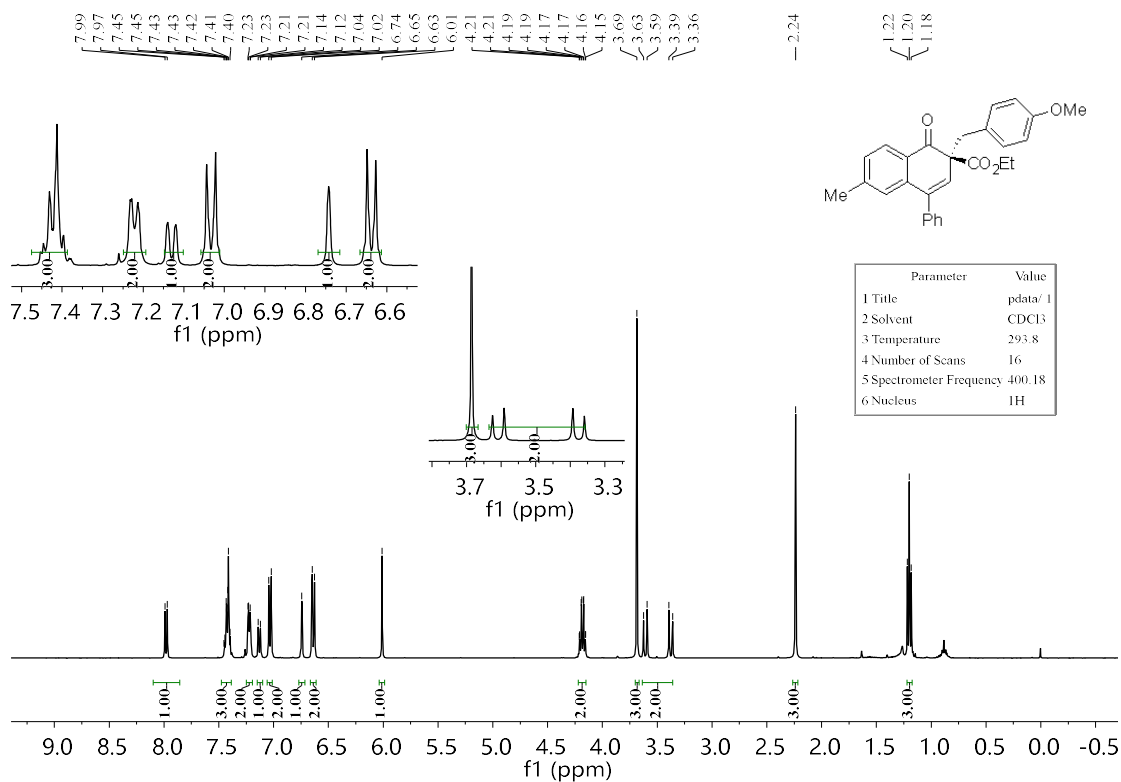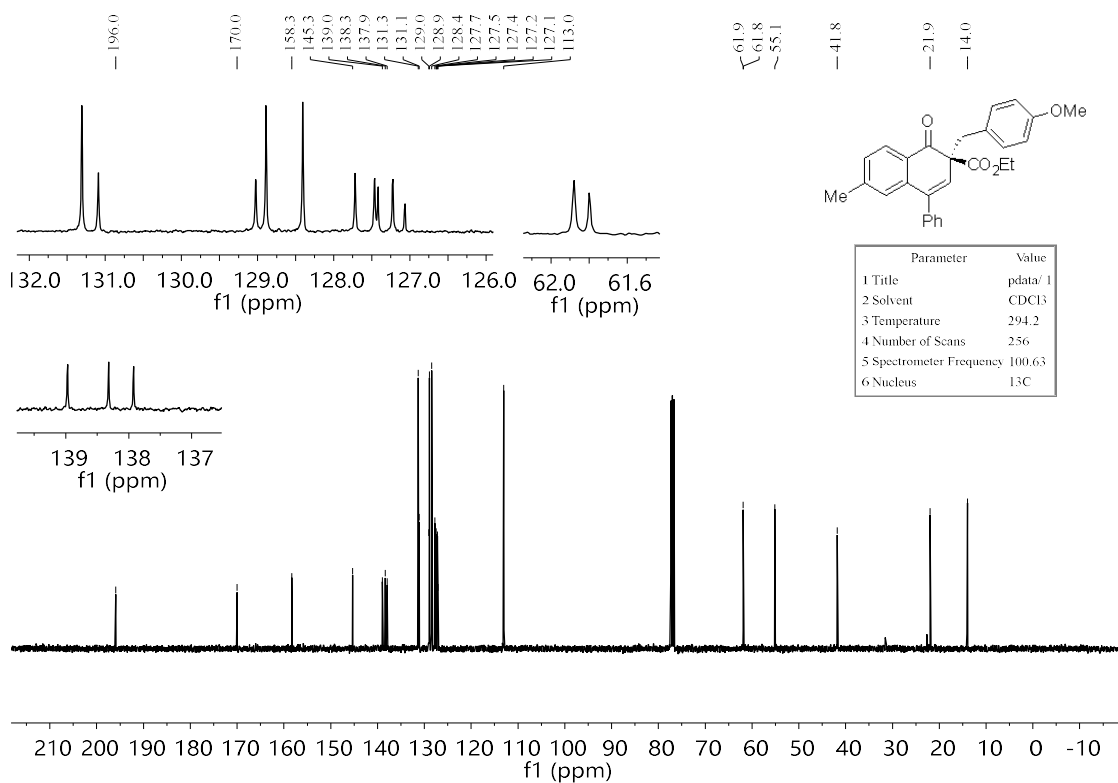

**Ethyl (S)-2-(4-methoxybenzyl)-1-oxo-4,6-diphenyl-1,2-dihydronaphthalene-2-carboxylate (B19)**

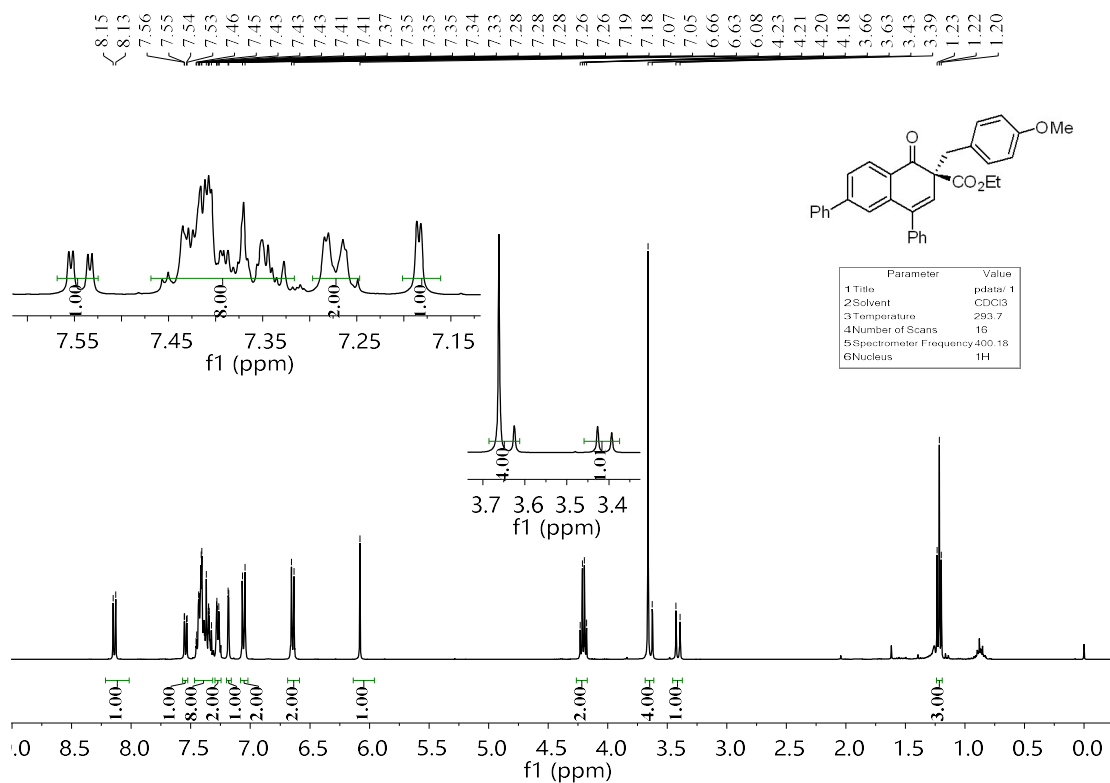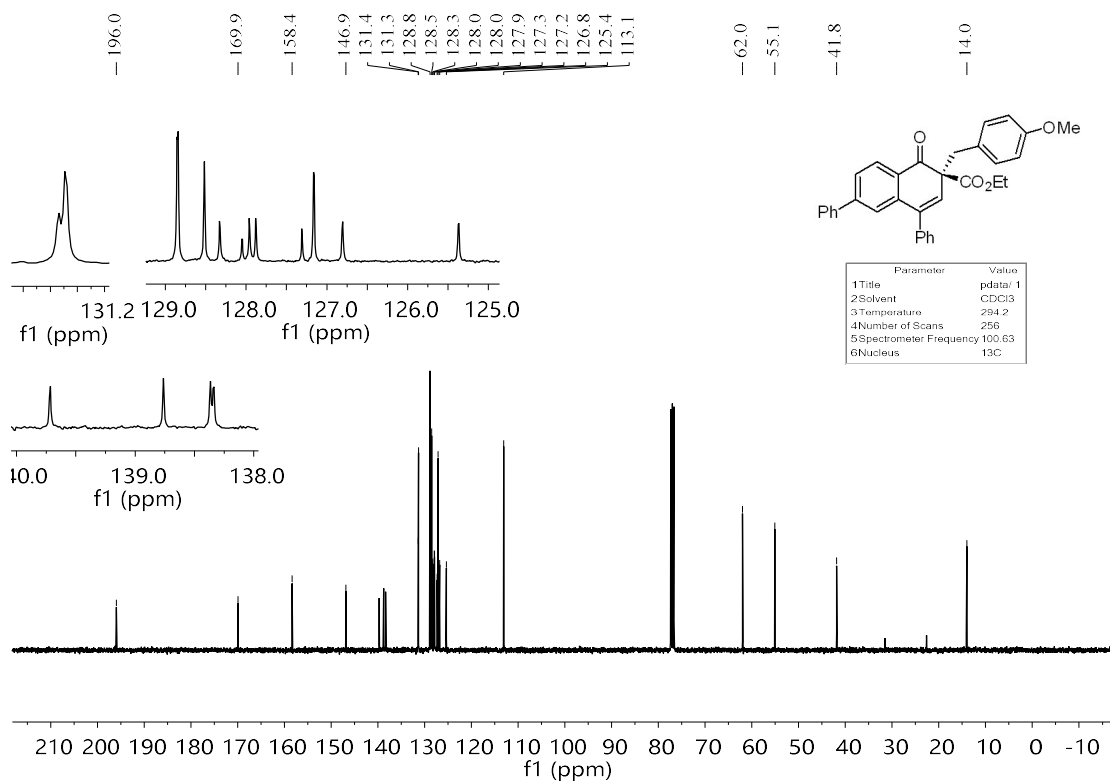

**Ethyl (S)-6-methoxy-2-(4-methoxybenzyl)-1-oxo-4-phenyl-1,2-dihydronaphthalene-2-carboxylate (B20)**

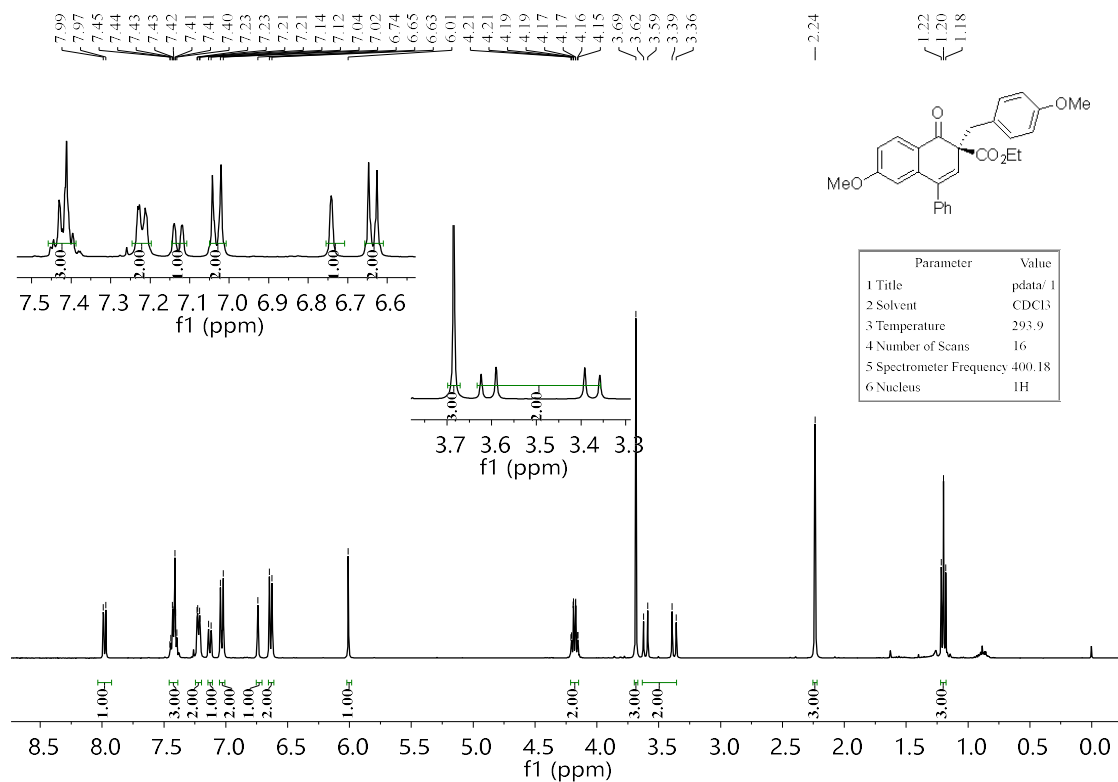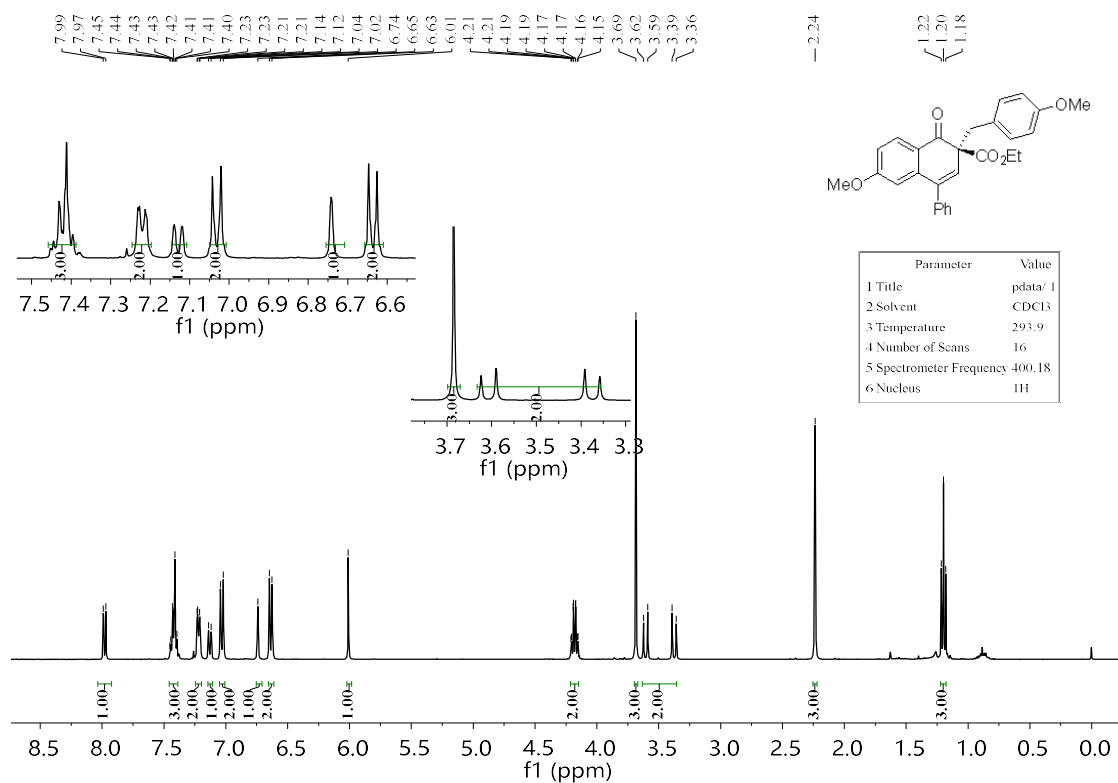

**Ethyl (S)-6-fluoro-2-(4-methoxybenzyl)-1-oxo-4-phenyl-1,2-dihydronaphthalene-2-carboxylate (B21)**

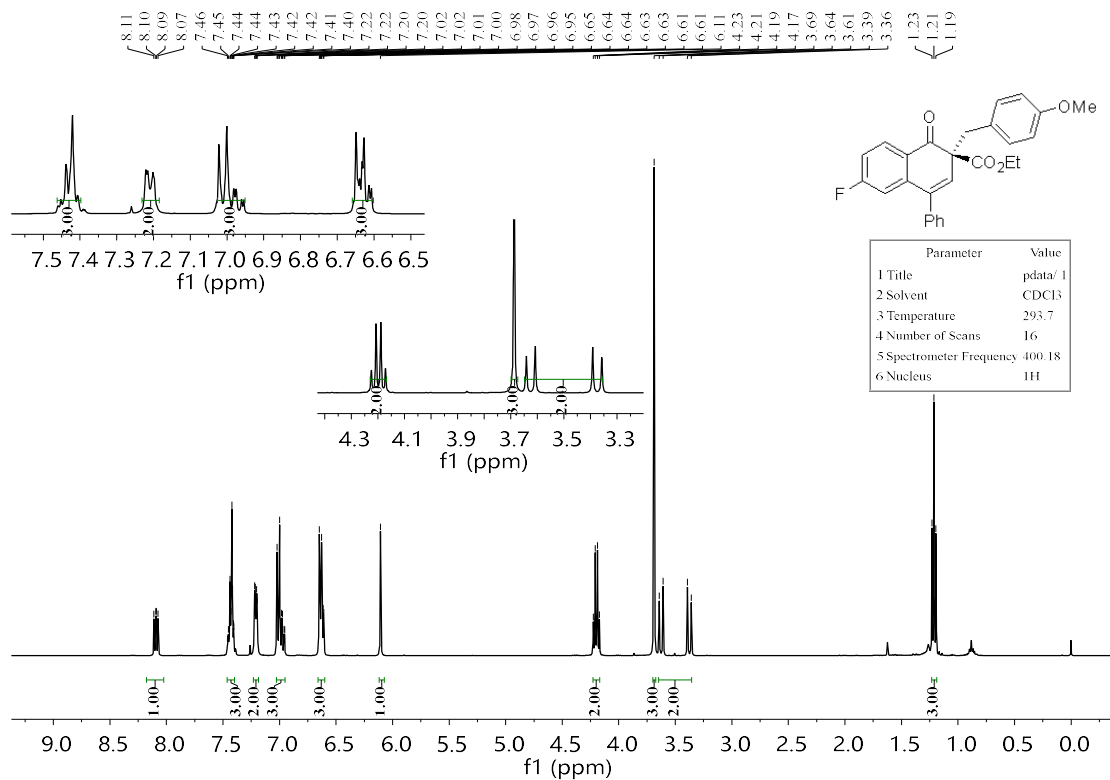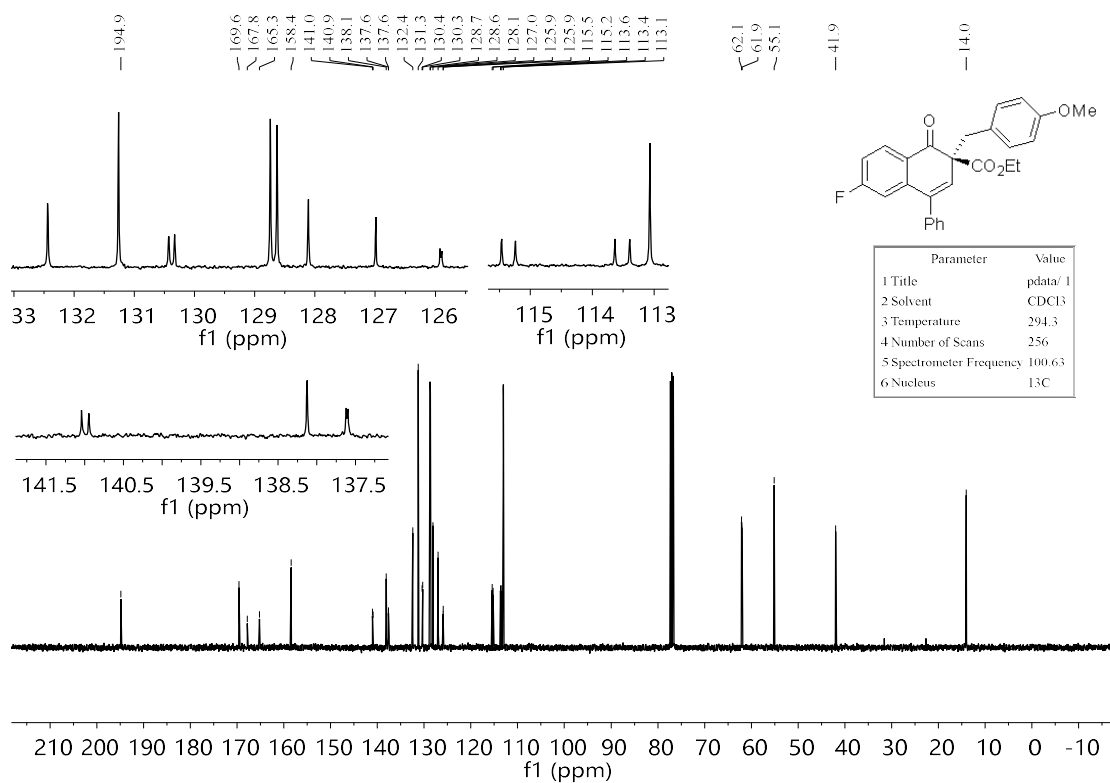

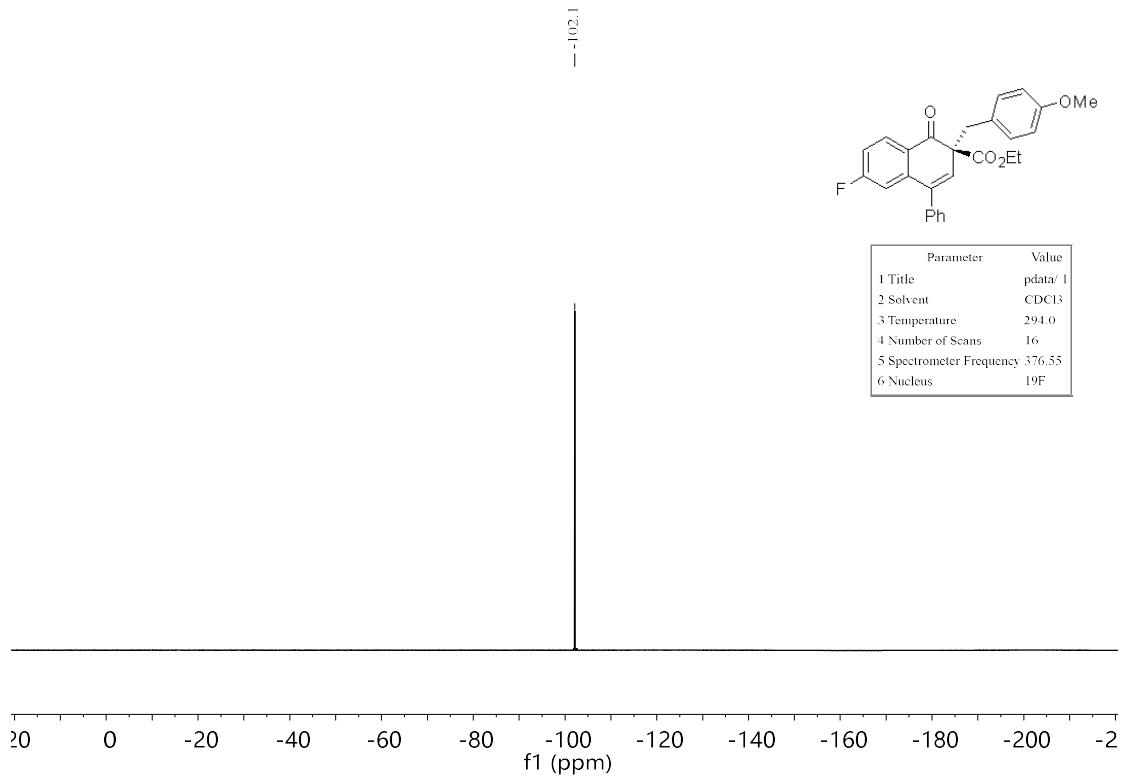

**Ethyl (S)-6-chloro-2-(4-methoxybenzyl)-1-oxo-4-phenyl-1,2-dihydronaphthalene-2-carboxylate (B22)**

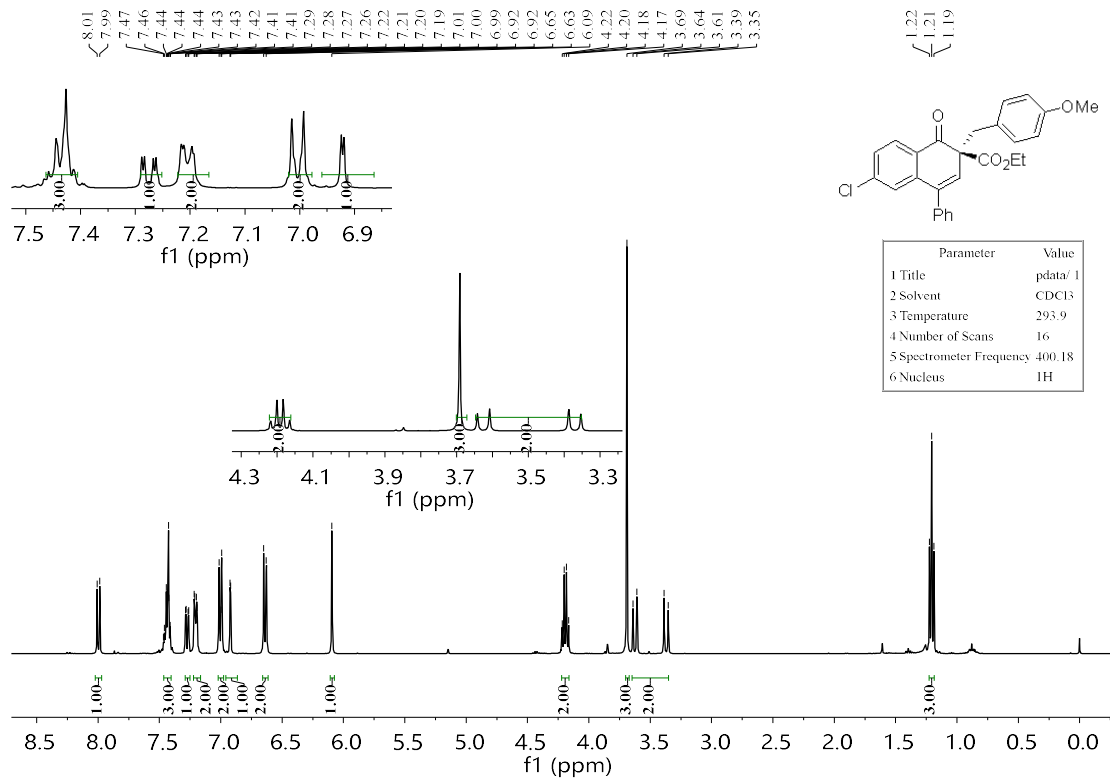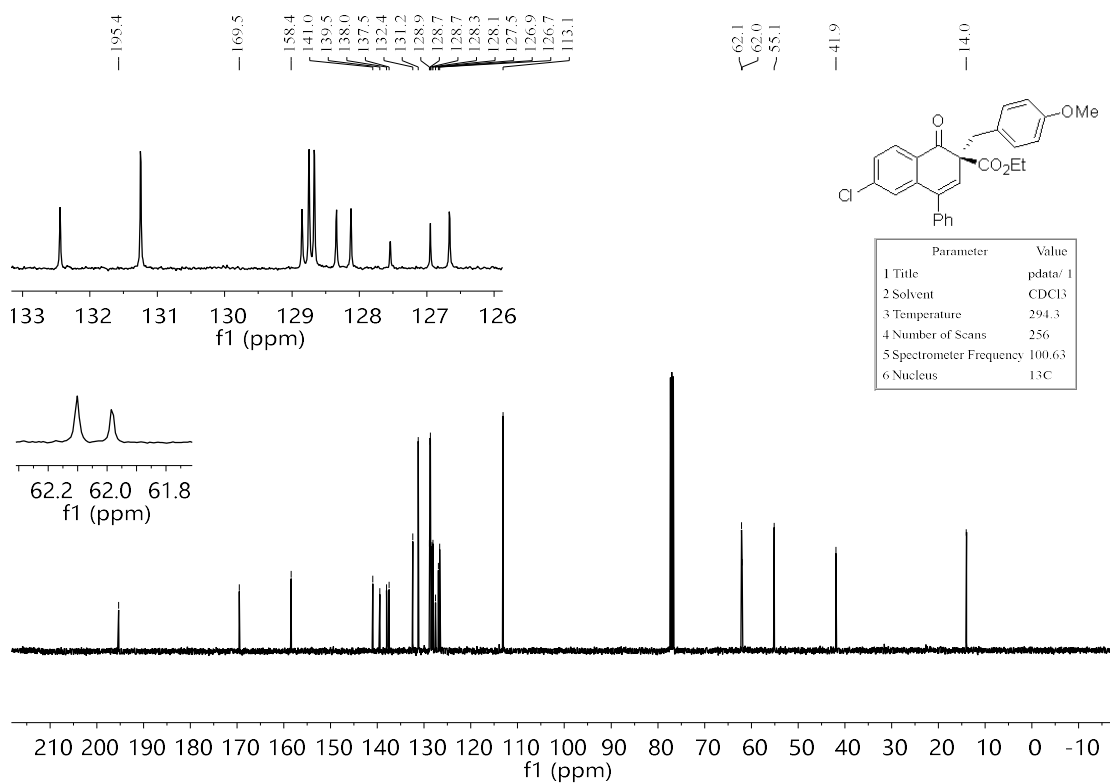

**Ethyl (S)-6-bromo-2-(4-methoxybenzyl)-1-oxo-4-phenyl-1,2-dihydronaphthalene-2-carboxylate (B23)**

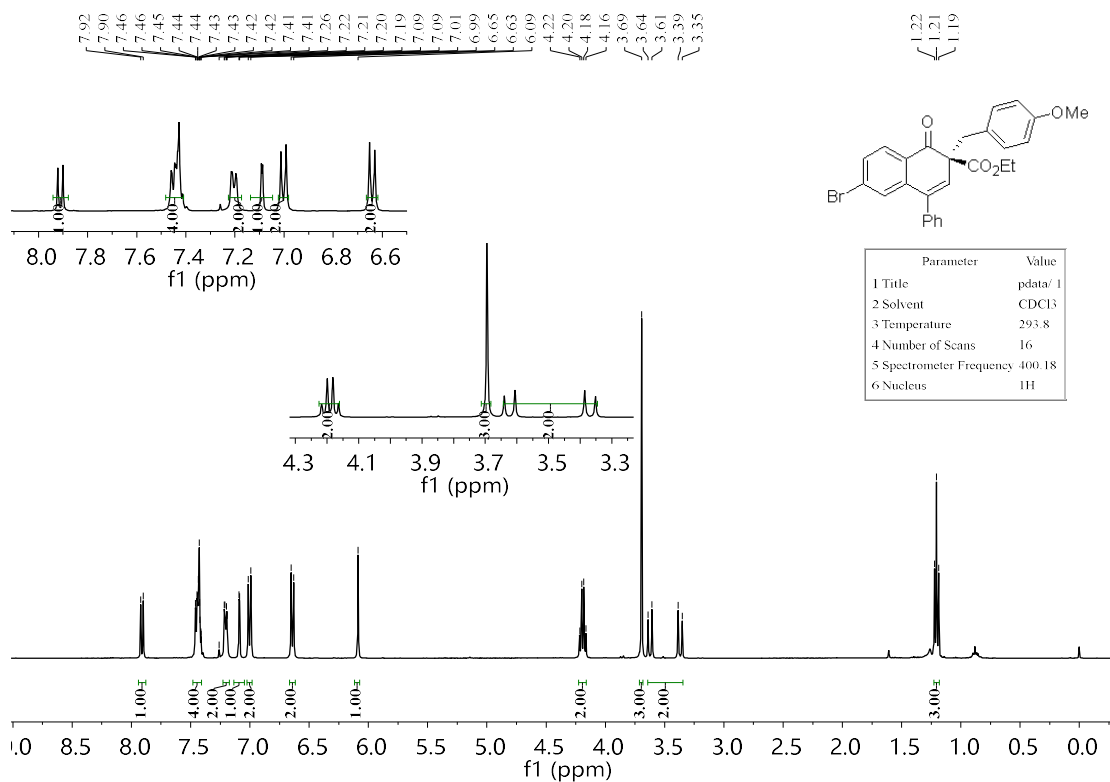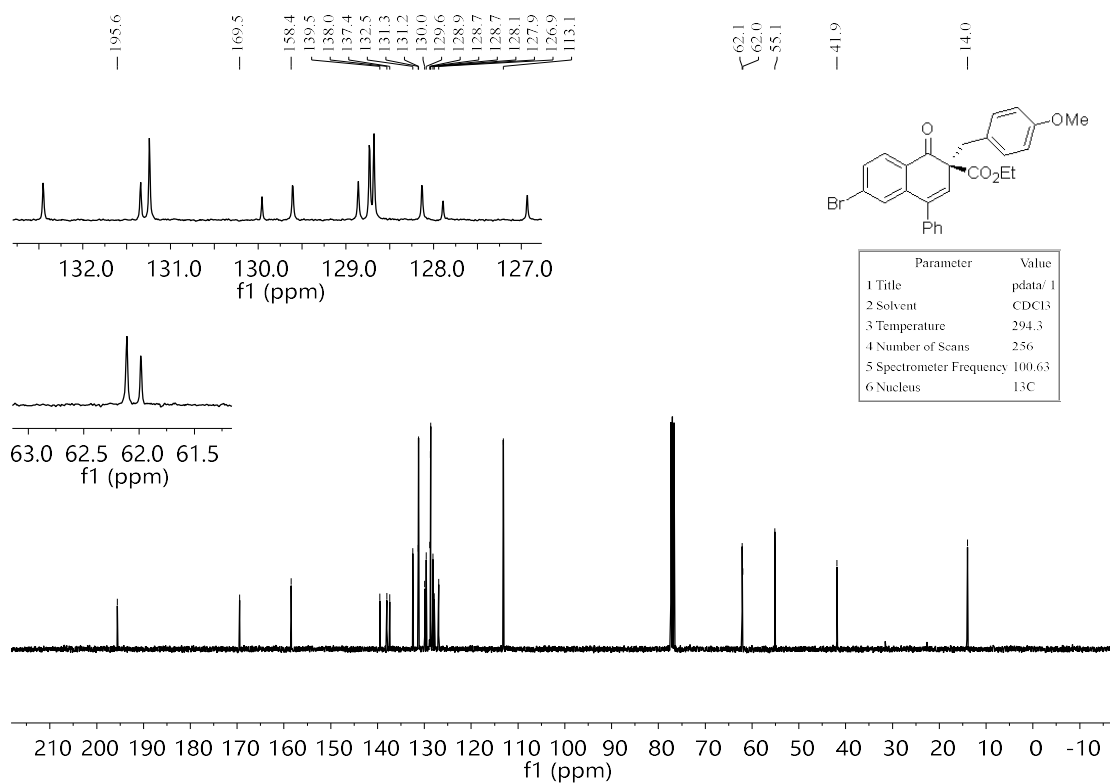



**Ethyl (S)-2-(4-methoxybenzyl)-1-oxo-4-phenyl-6-(trifluoromethoxy)-1,2-dihydronaphthalene-2-carboxylate (B24)**

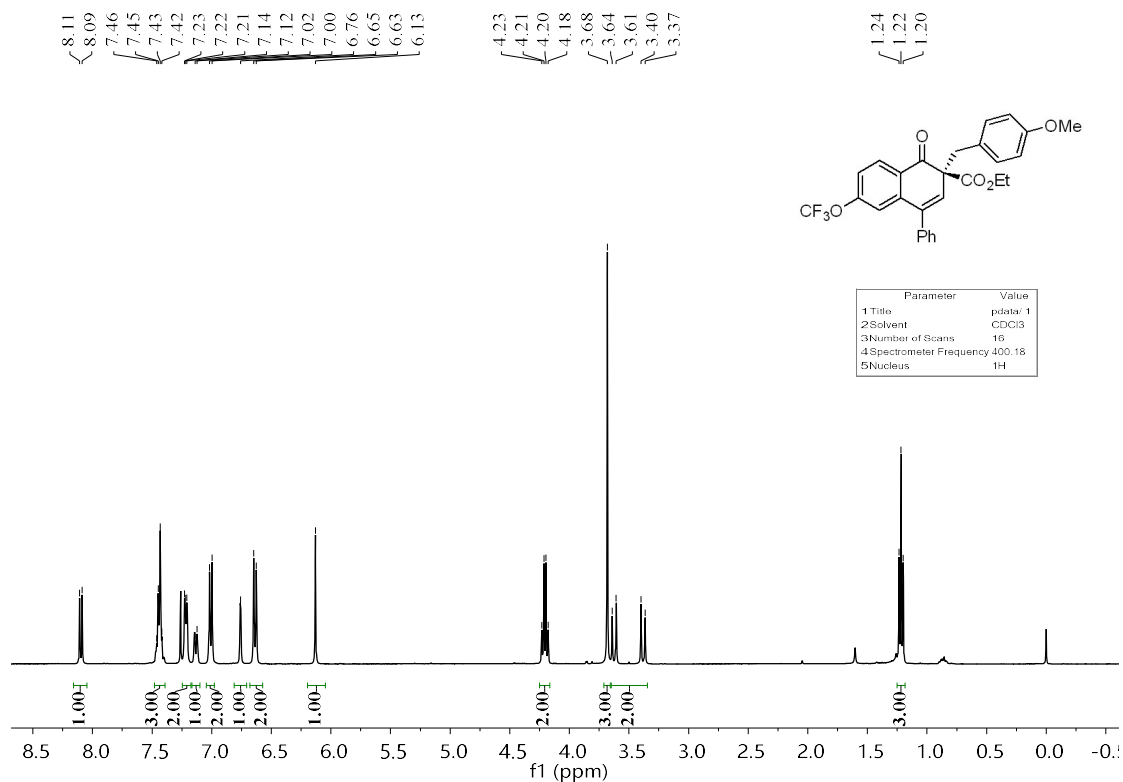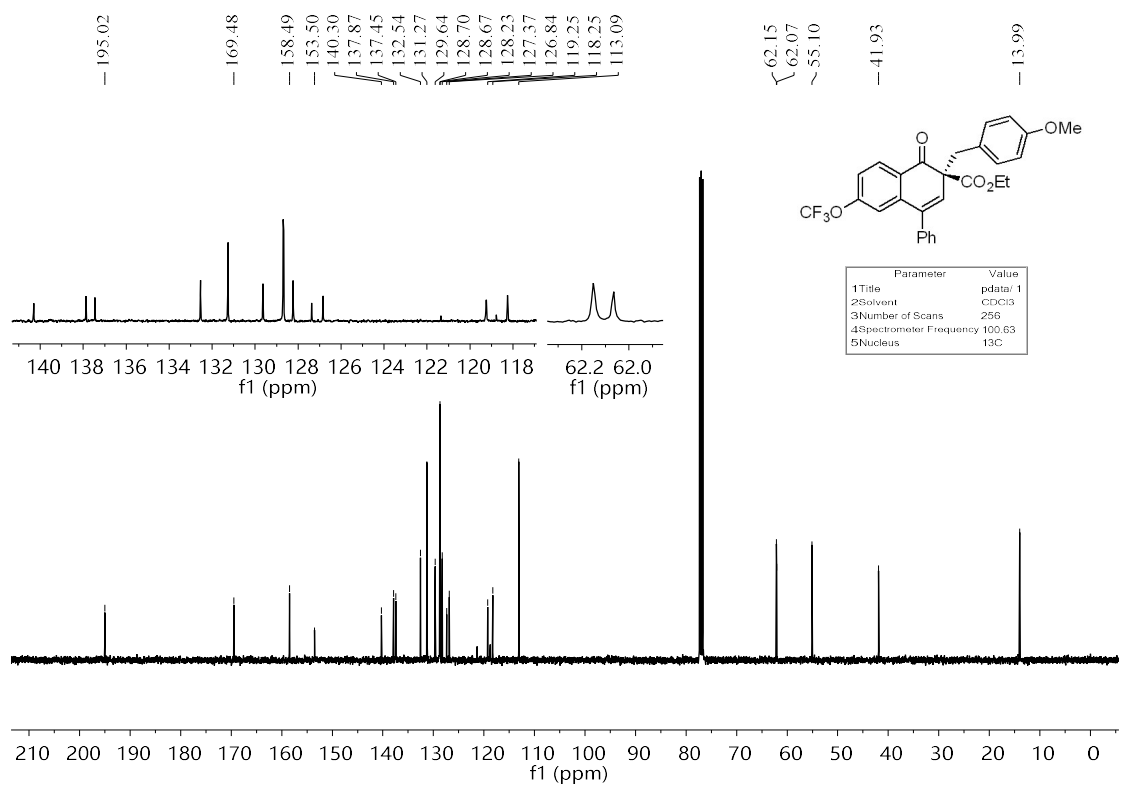

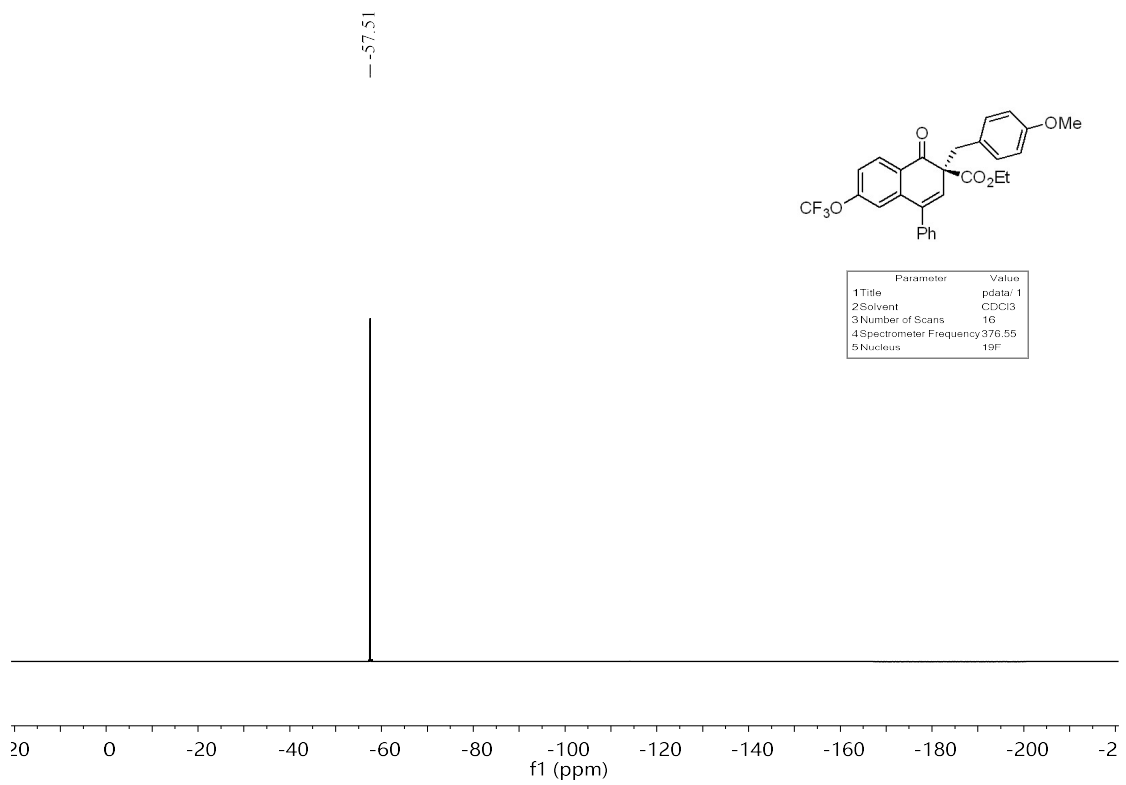

**Ethyl (S)-8-fluoro-2-(4-methoxybenzyl)-1-oxo-4-phenyl-1,2-dihydronaphthalene-2-carboxylate (B25)**

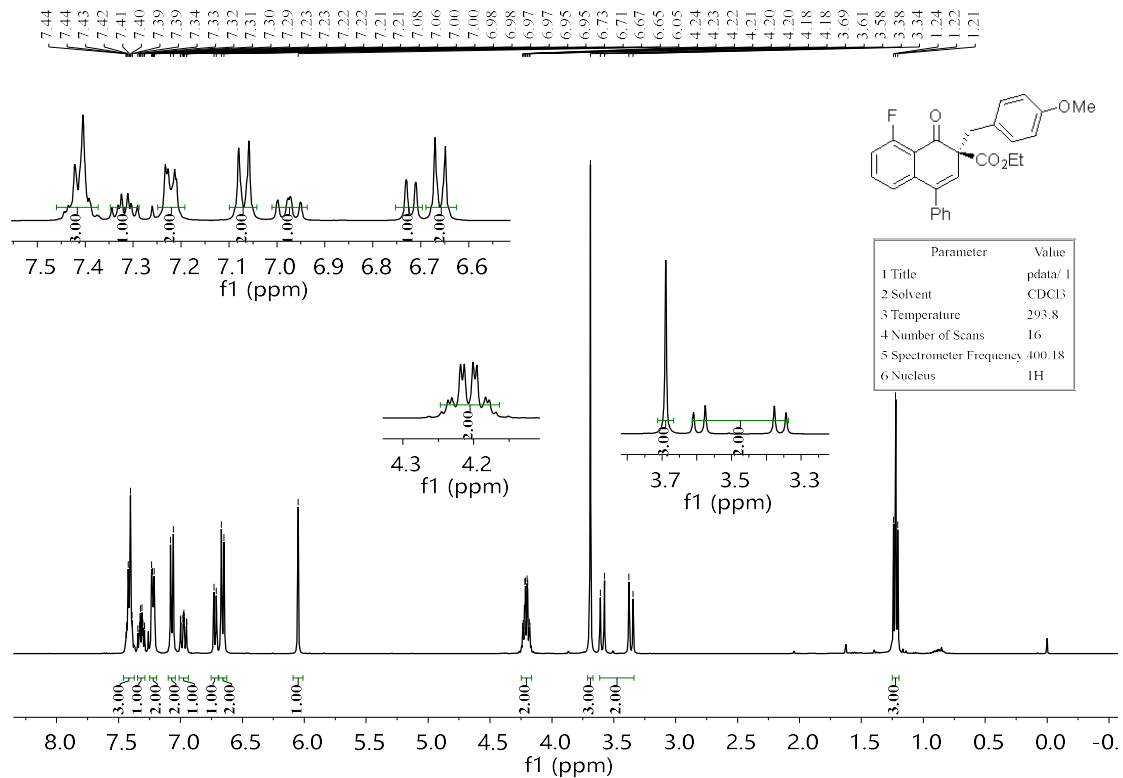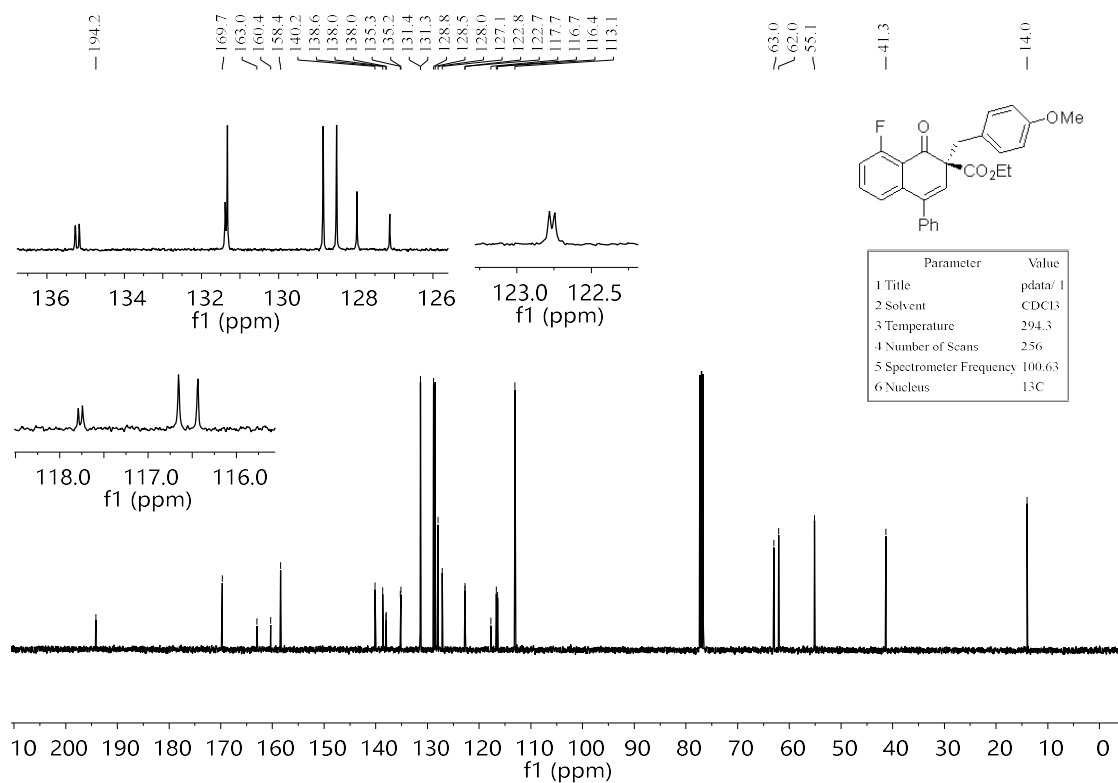

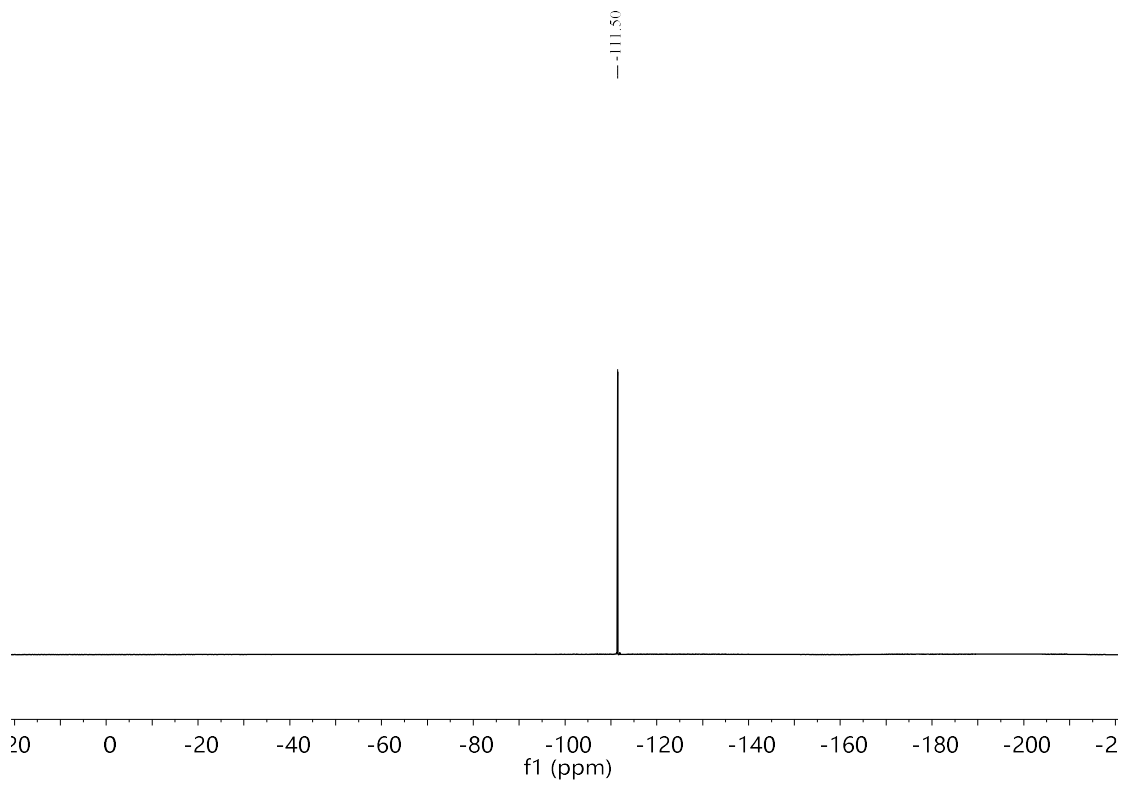

**Ethyl (S)-2-(4-methoxybenzyl)-8-methyl-1-oxo-4-phenyl-1,2-dihydronaphthalene-2-carboxylate (B26)**

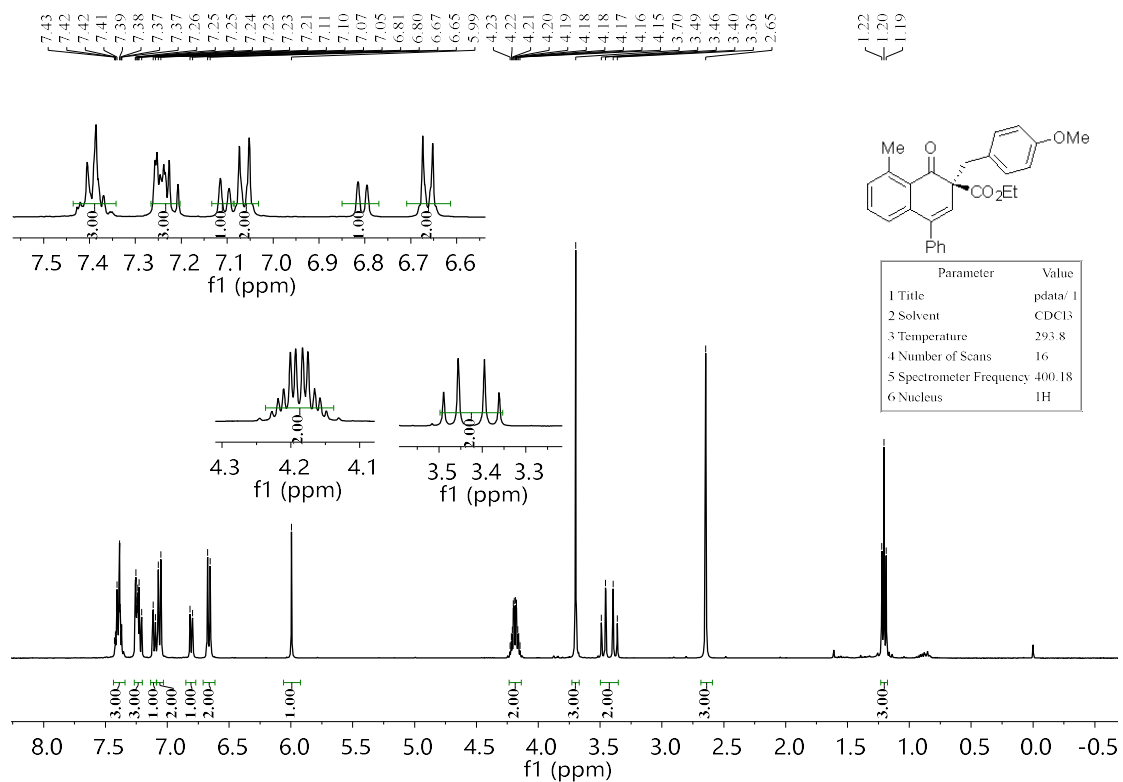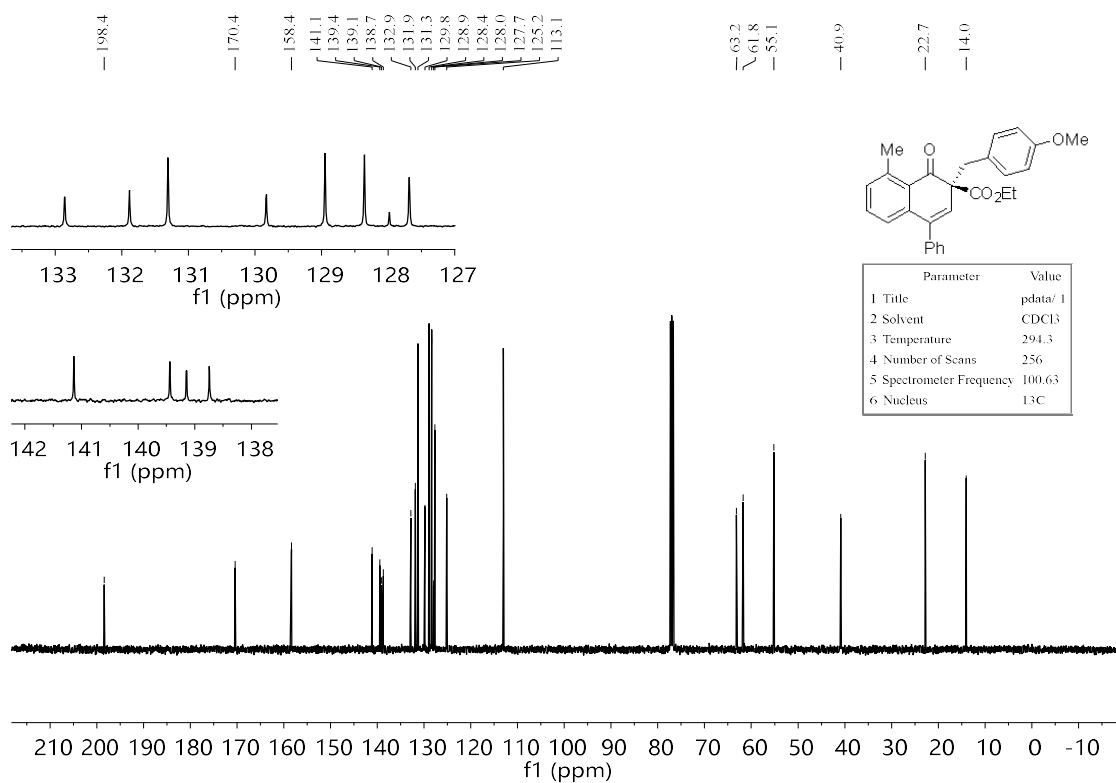

**Ethyl (S)-2-(4-methoxybenzyl)-5,7-dimethyl-1-oxo-4-phenyl-1,2-dihydronaphthalene-2-carboxylate (B27)**

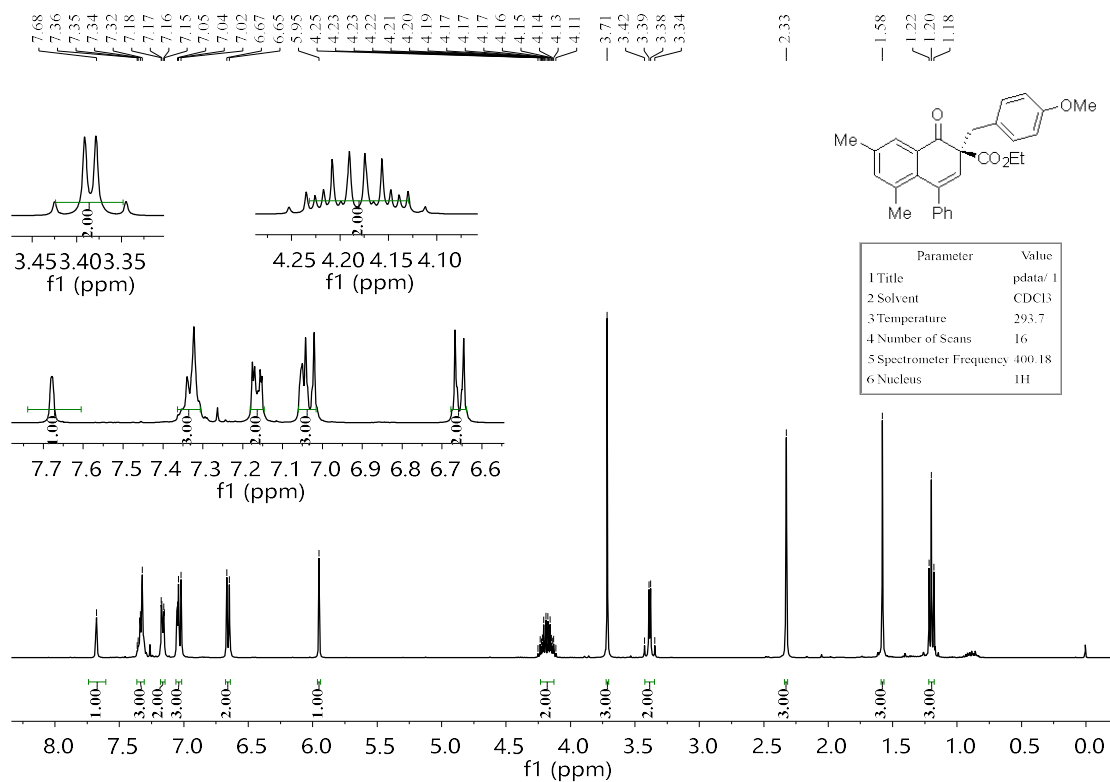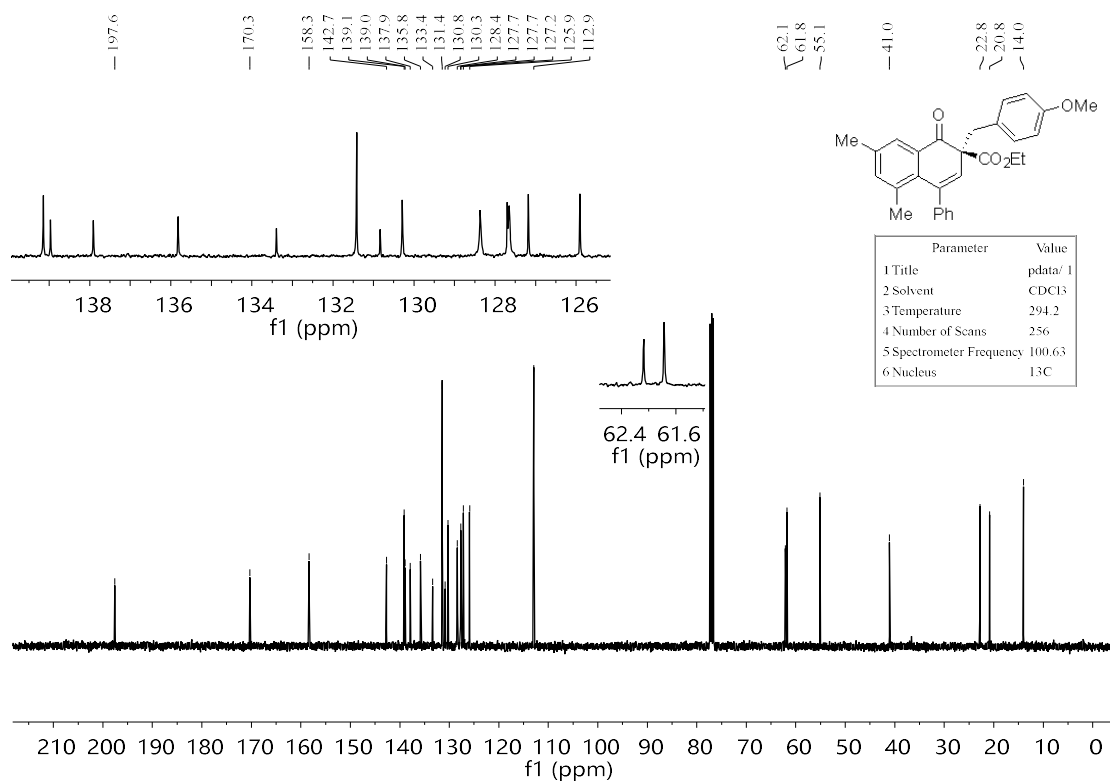

**Ethyl (S)-5,7-dibromo-2-(4-methoxybenzyl)-1-oxo-4-phenyl-1,2-dihydronaphthalene-2-carboxylate (B28)**

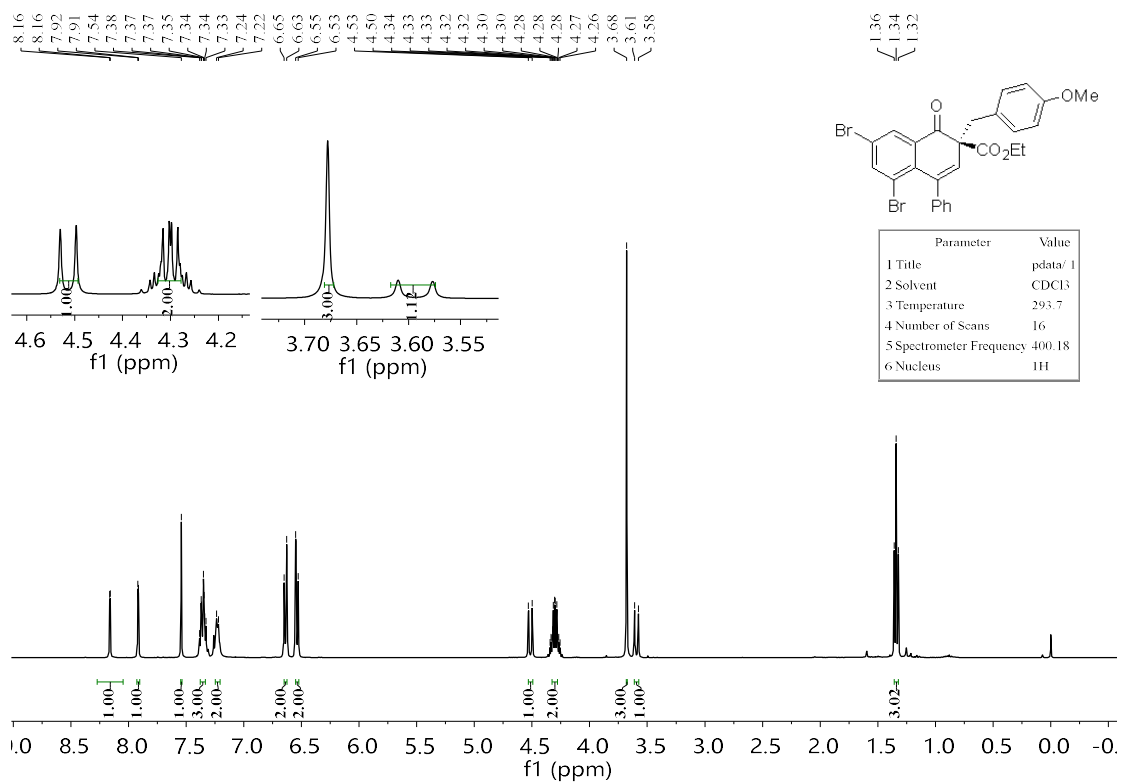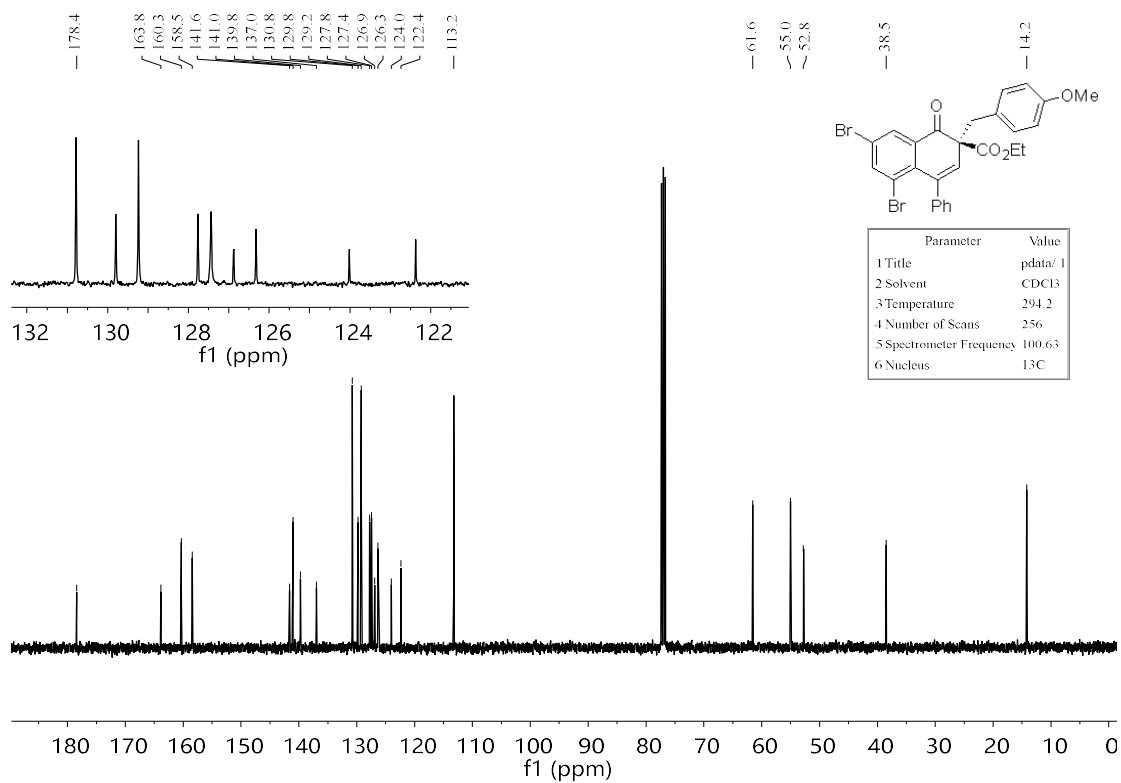

**Ethyl (S)-5,7-dichloro-2-(4-methoxybenzyl)-1-oxo-4-phenyl-1,2-dihydronaphthalene-2-carboxylate (B29)**

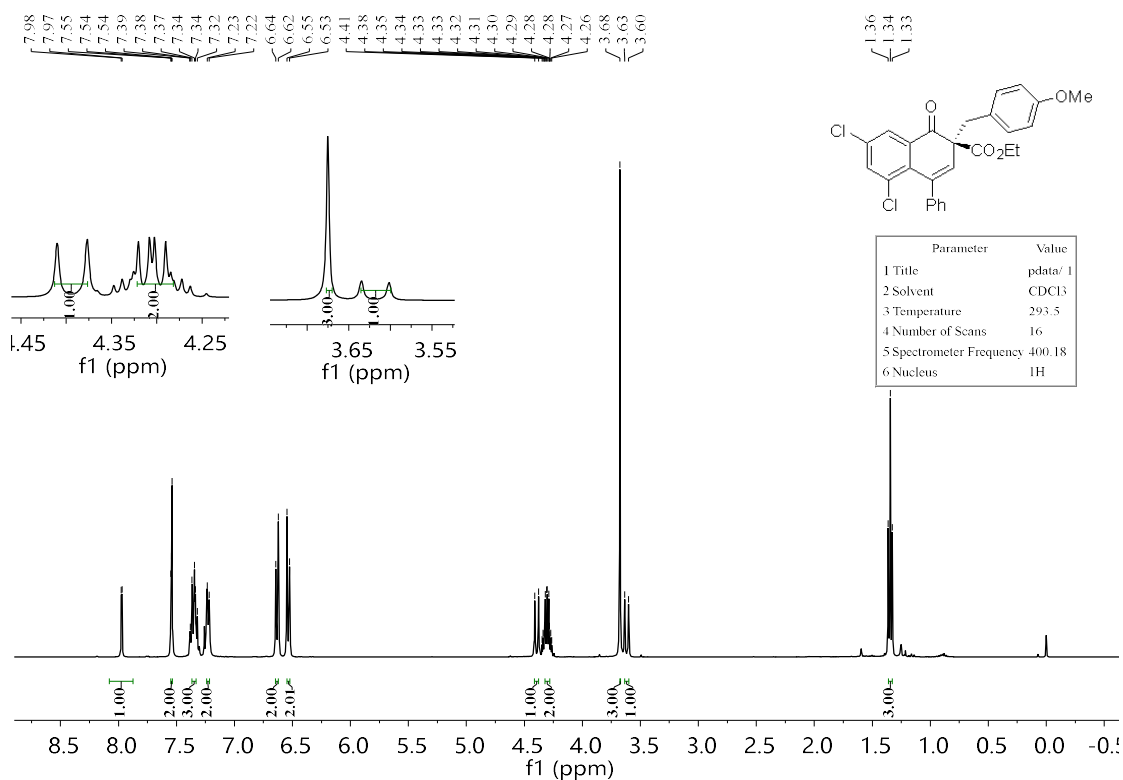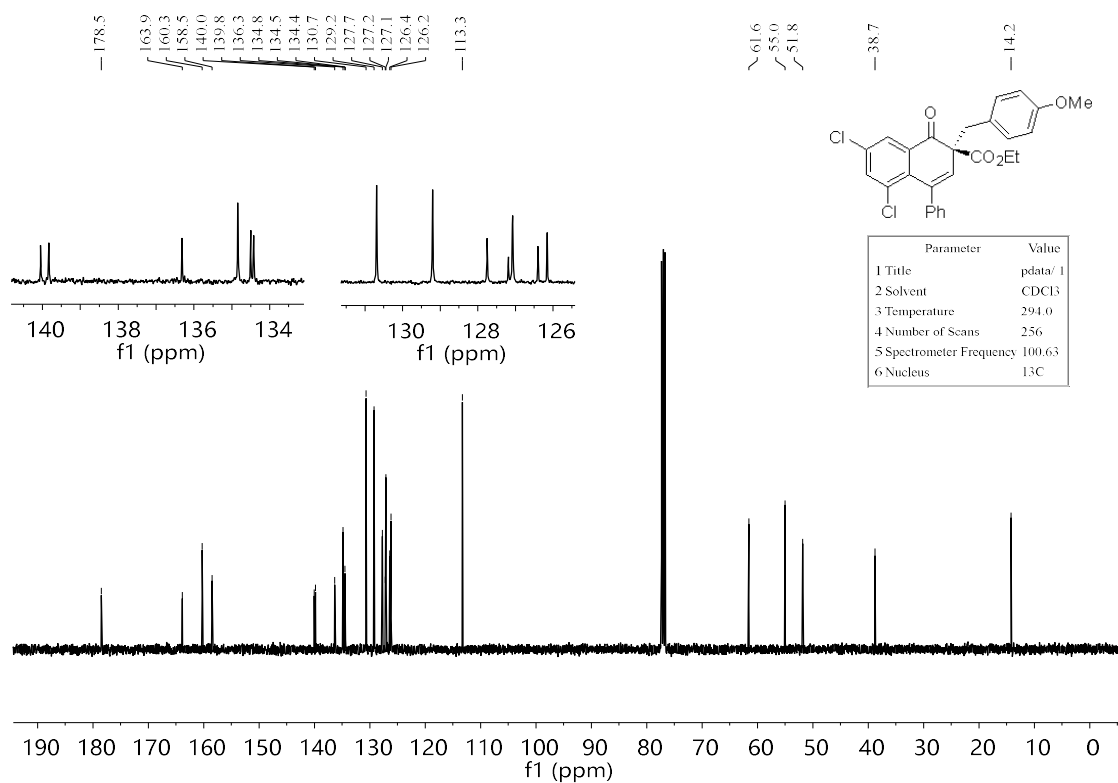



**Ethyl (S)-2-(4-methylbenzyl)-1-oxo-4-phenyl-1,2-dihydronaphthalene-2-carboxylate (B30)**

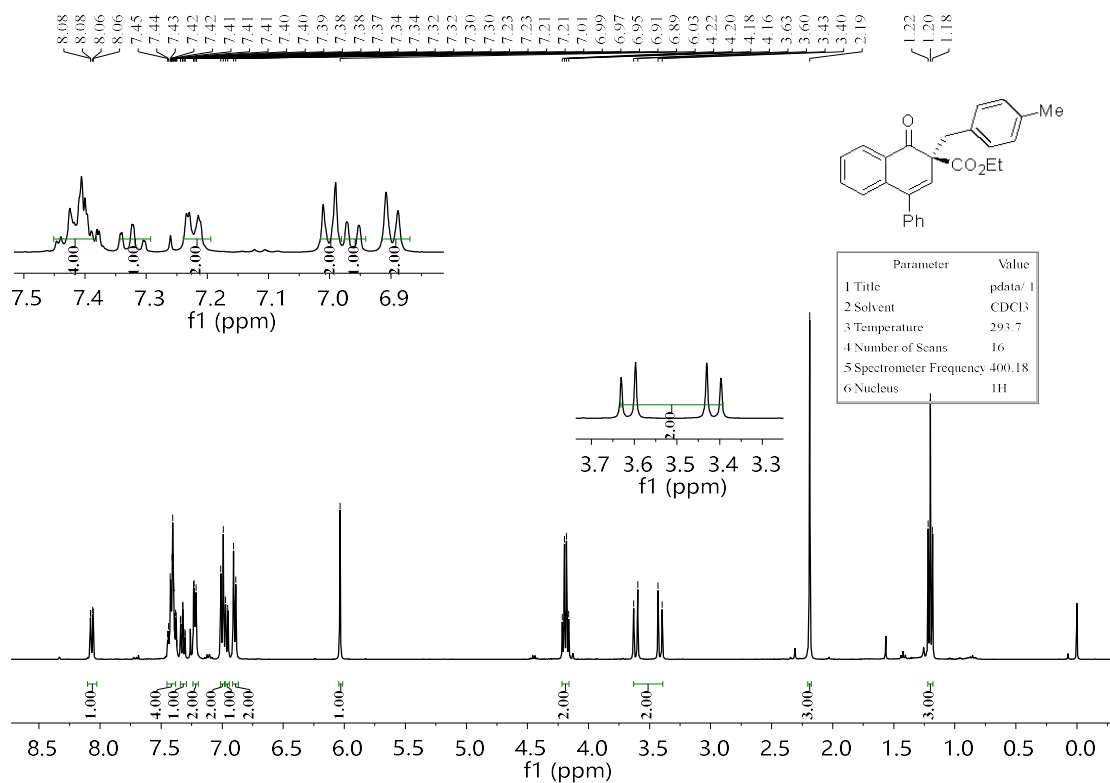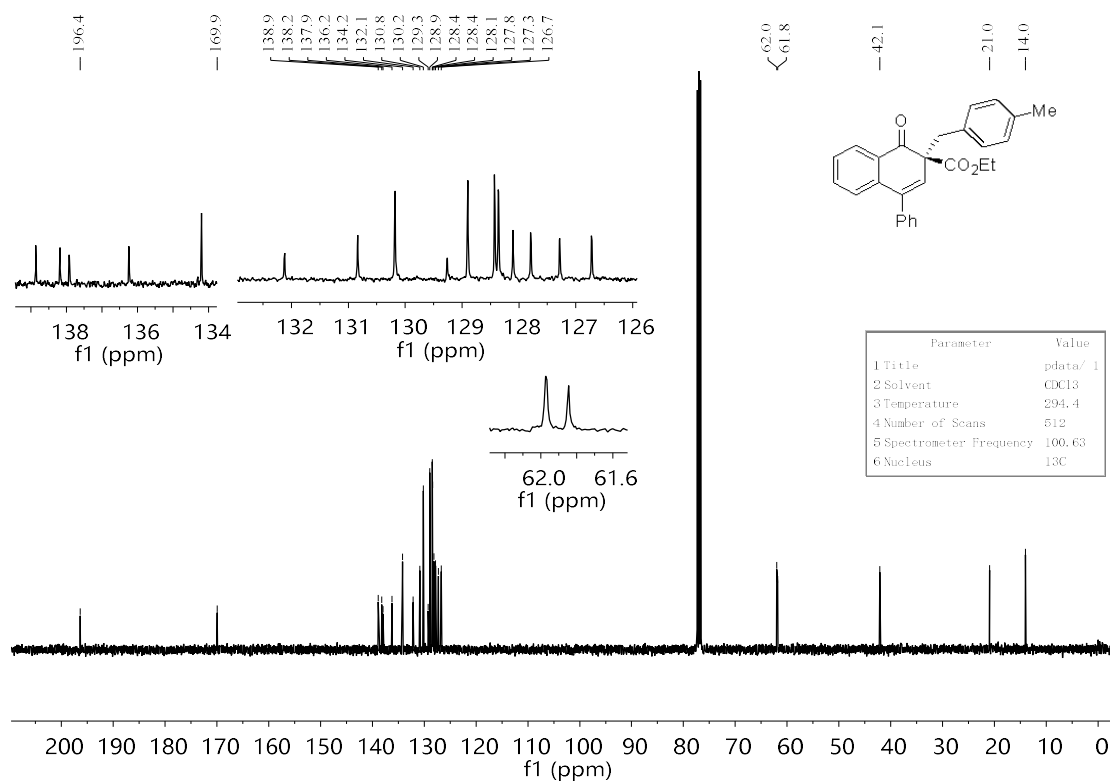

**Ethyl (S)-2-(2-methoxybenzyl)-1-oxo-4-phenyl-1,2-dihydronaphthalene-2-carboxylate (B31)**

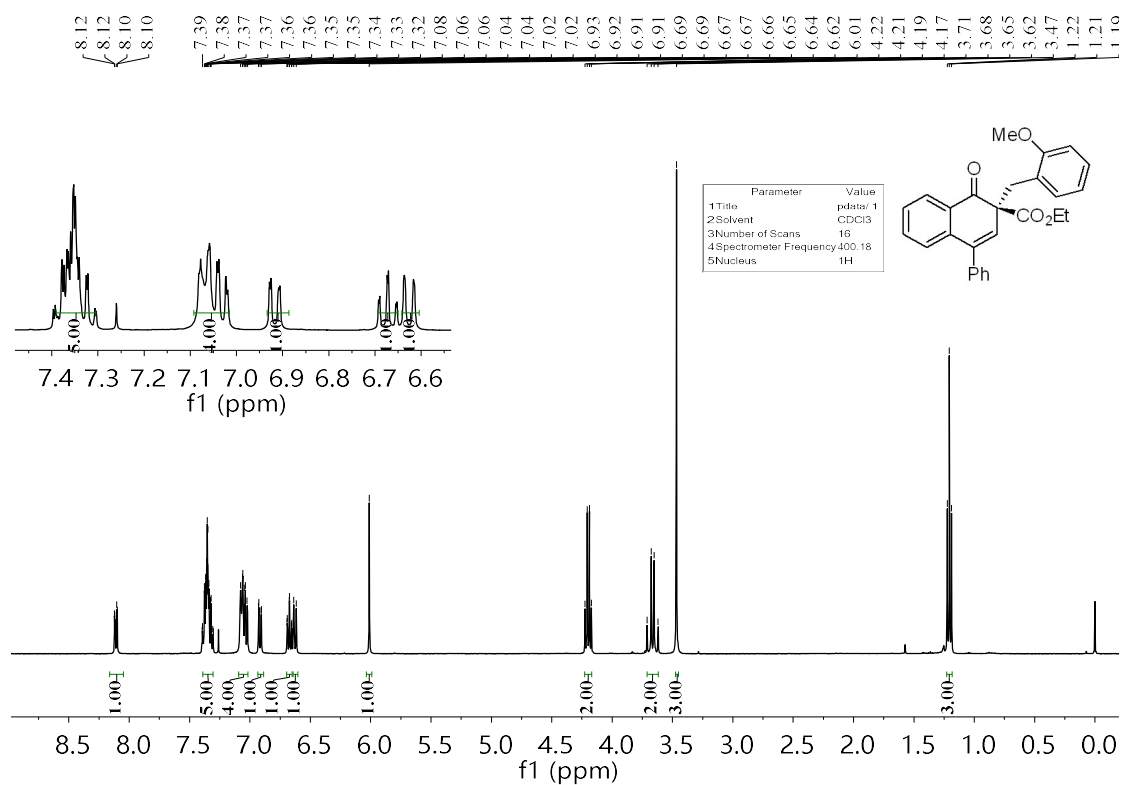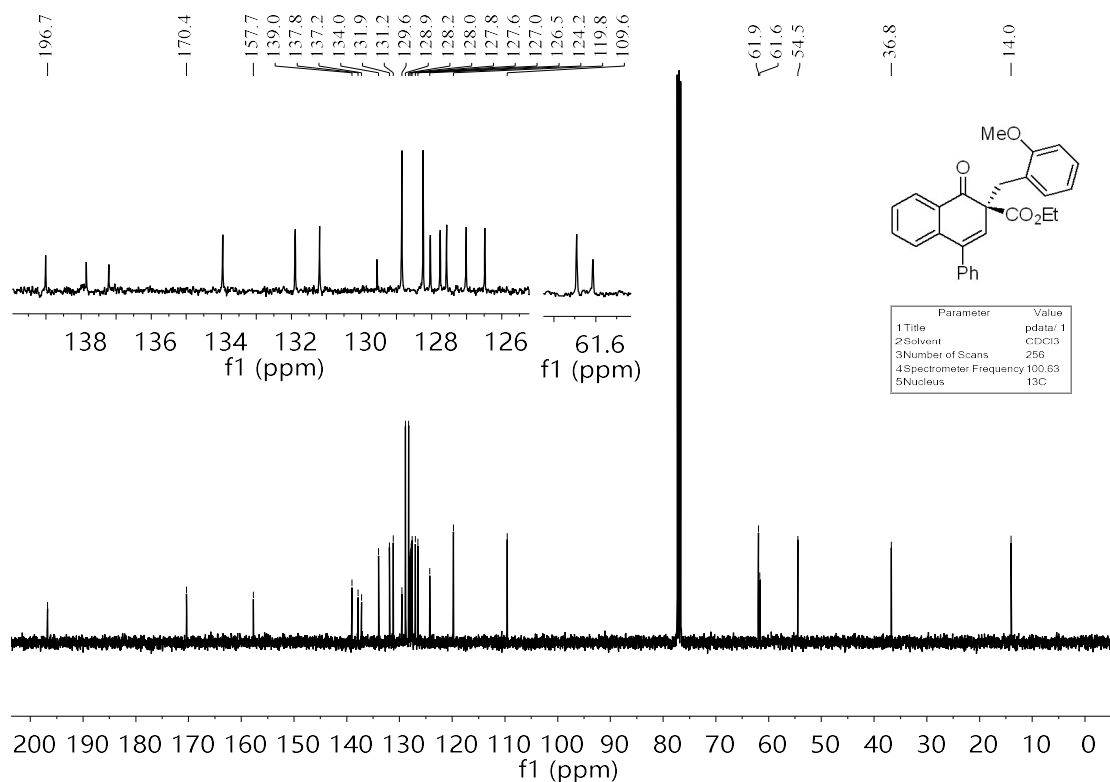

**Ethyl (S)-2-(4-(methylthio)benzyl)-1-oxo-4-phenyl-1,2-dihydronaphthalene-2-carboxylate (B32)**

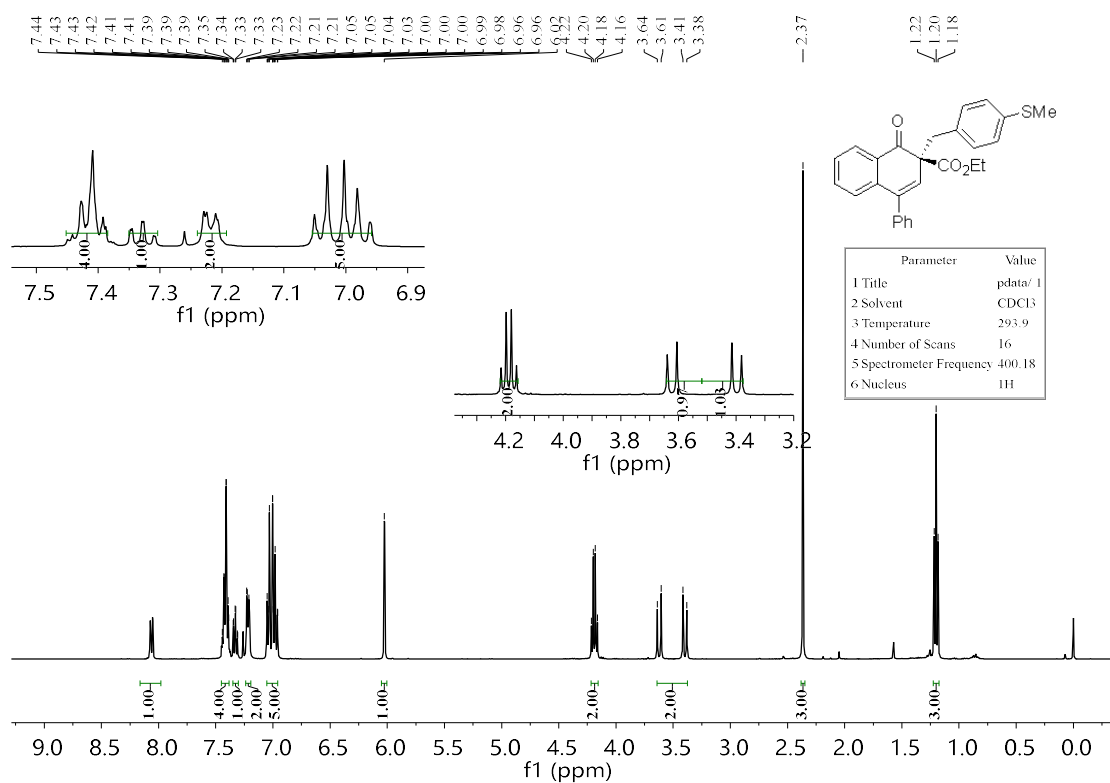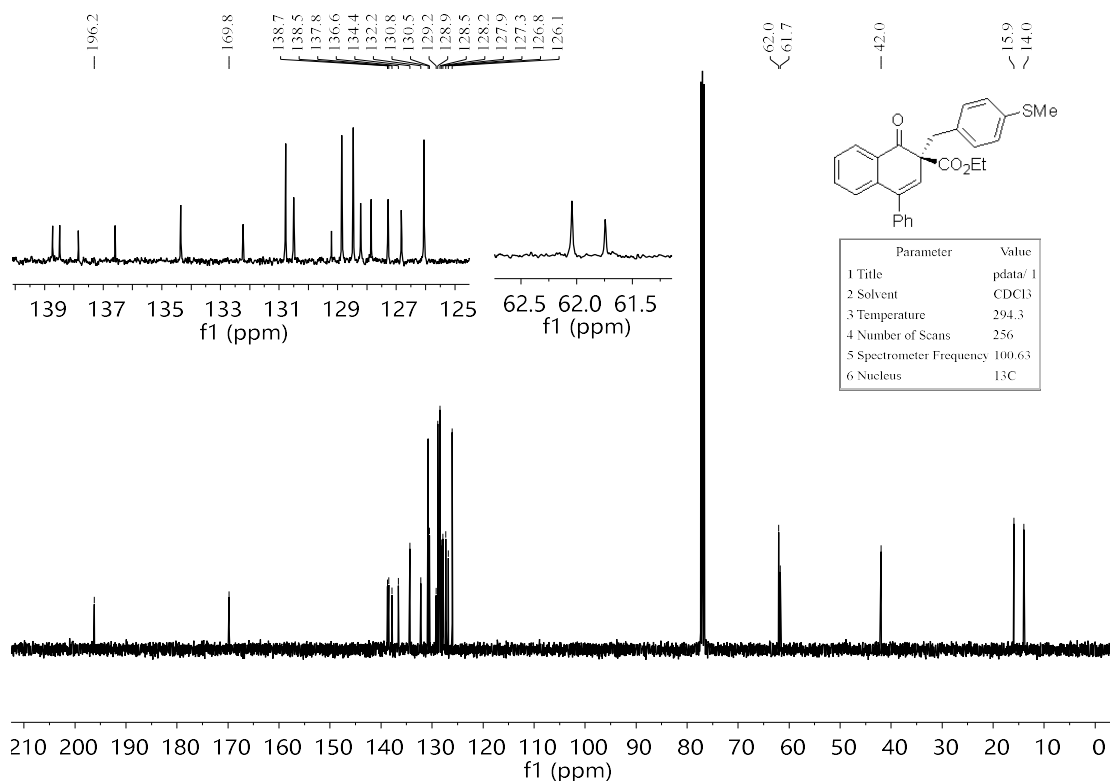

**Ethyl (S)-2-(3,4-dimethoxybenzyl)-1-oxo-4-phenyl-1,2-dihydronaphthalene-2-carboxylate (B33)**

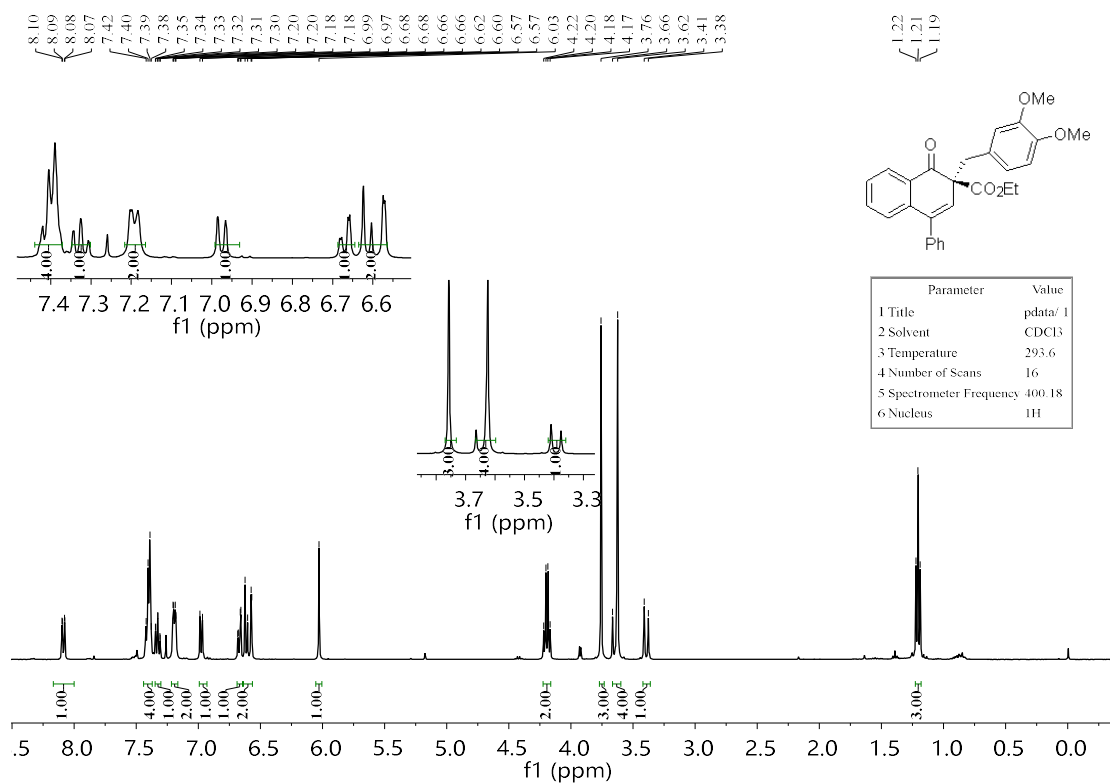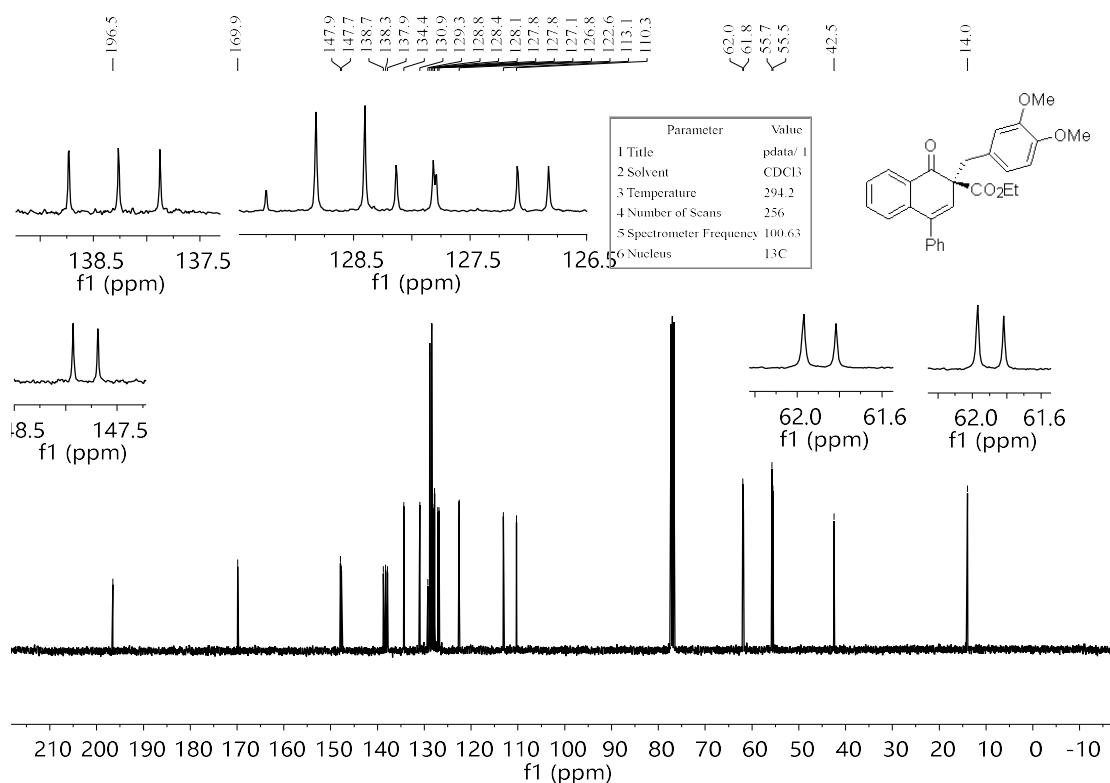

**Ethyl (S)-1-oxo-4-phenyl-2-(3,4,5-trimethoxybenzyl)-1,2-dihydronaphthalene-2-carboxylate (B34)**

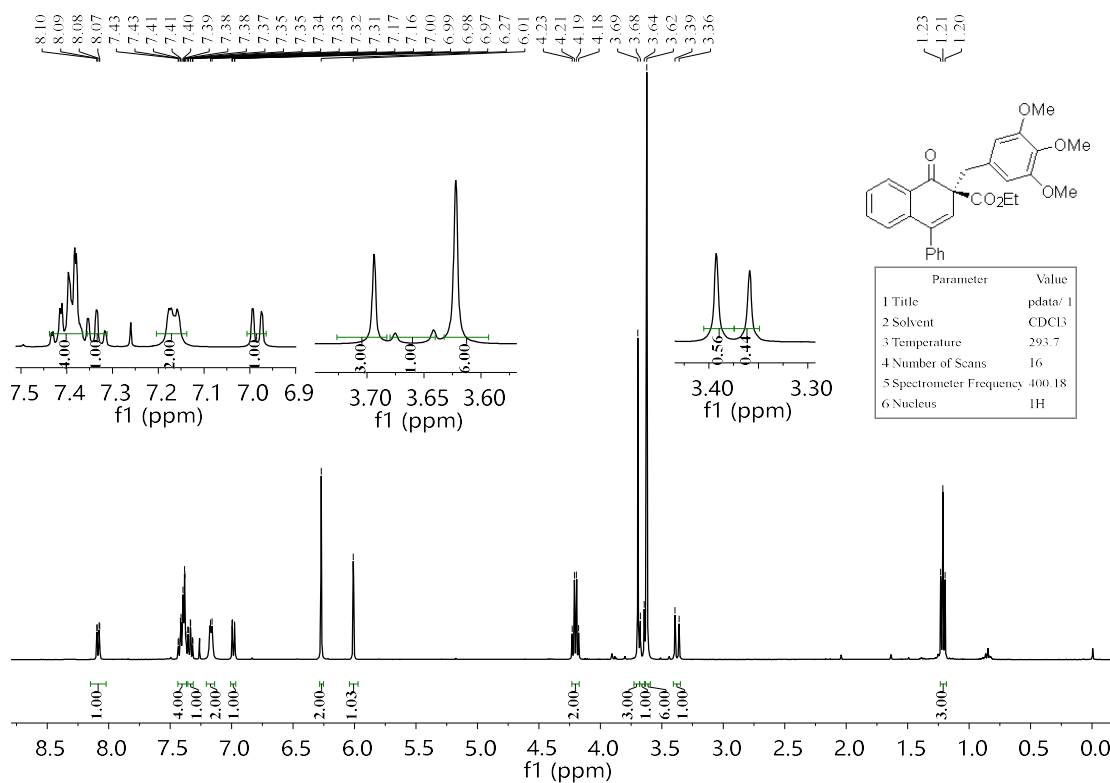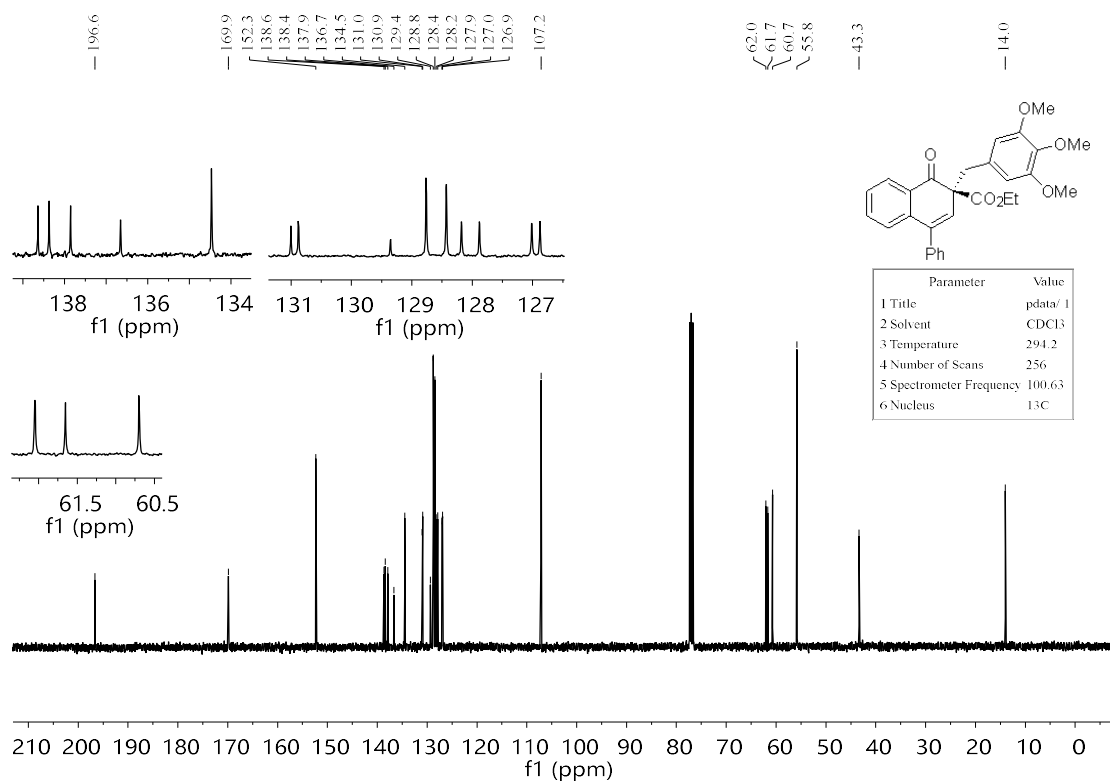

**Ethyl (S)-2-(3-fluoro-4-methoxybenzyl)-1-oxo-4-phenyl-1,2-dihydronaphthalene-2-carboxylate (B35)**

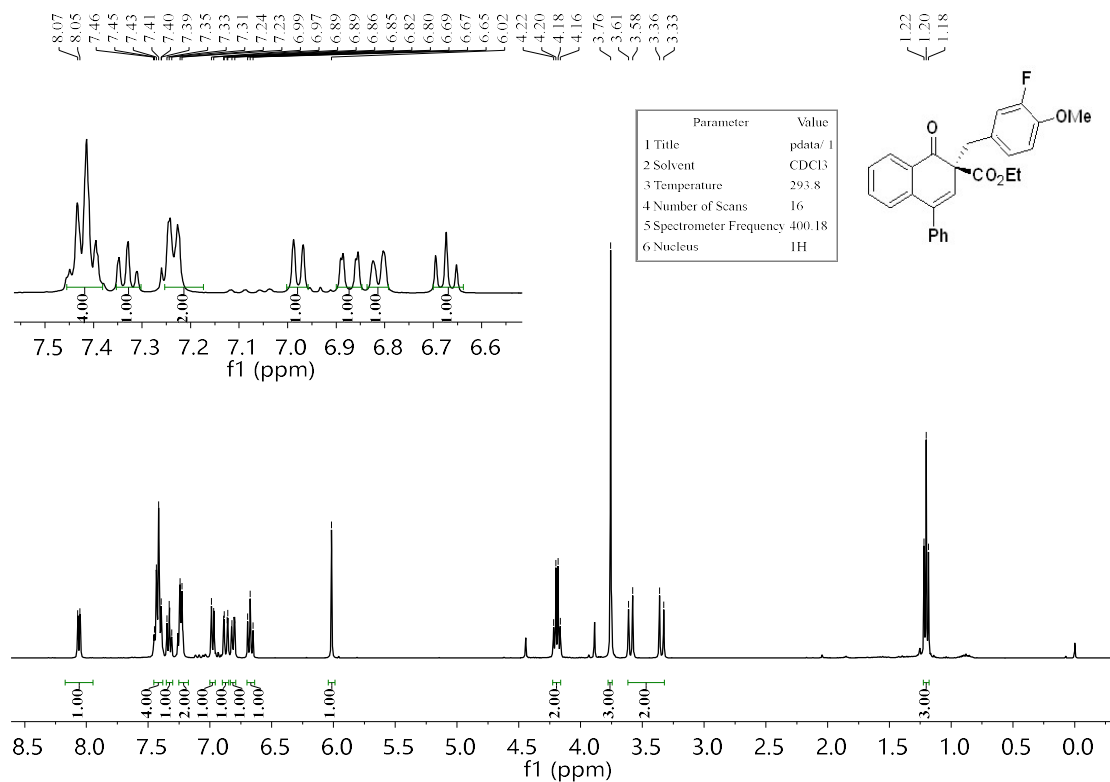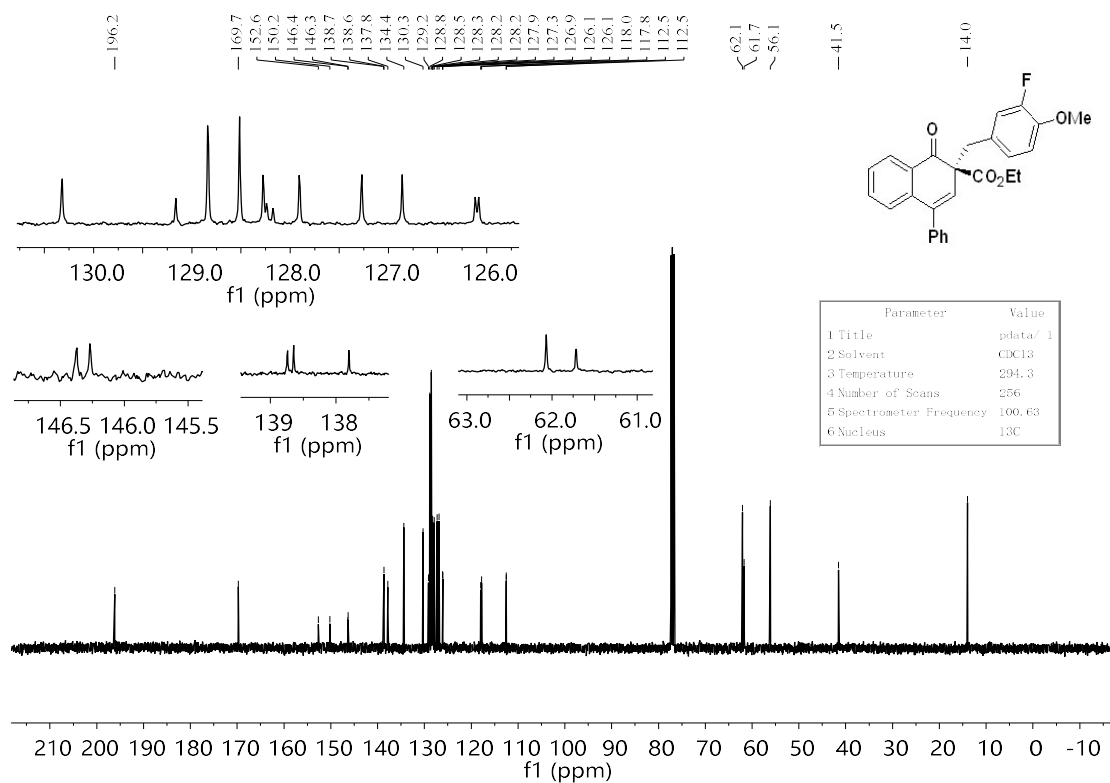

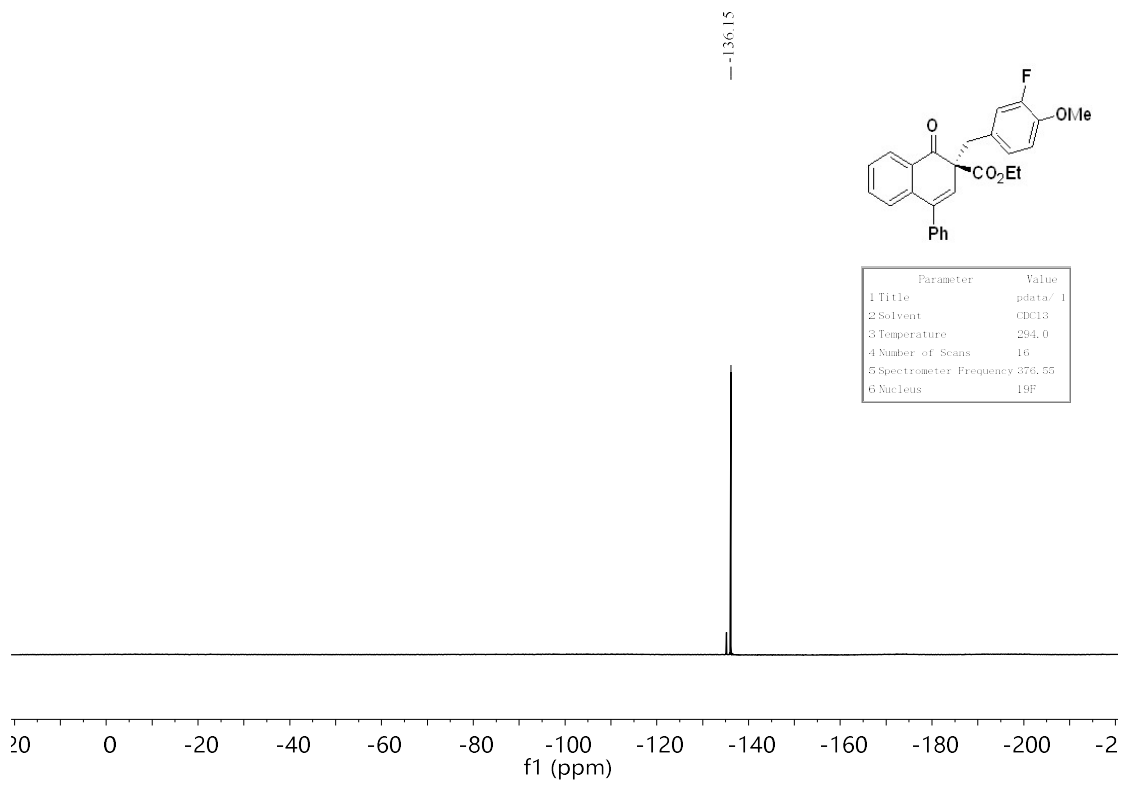

**Ethyl (S)-2-(3-chloro-4-methoxybenzyl)-1-oxo-4-phenyl-1,2-dihydronaphthalene-2-carboxylate (B36)**

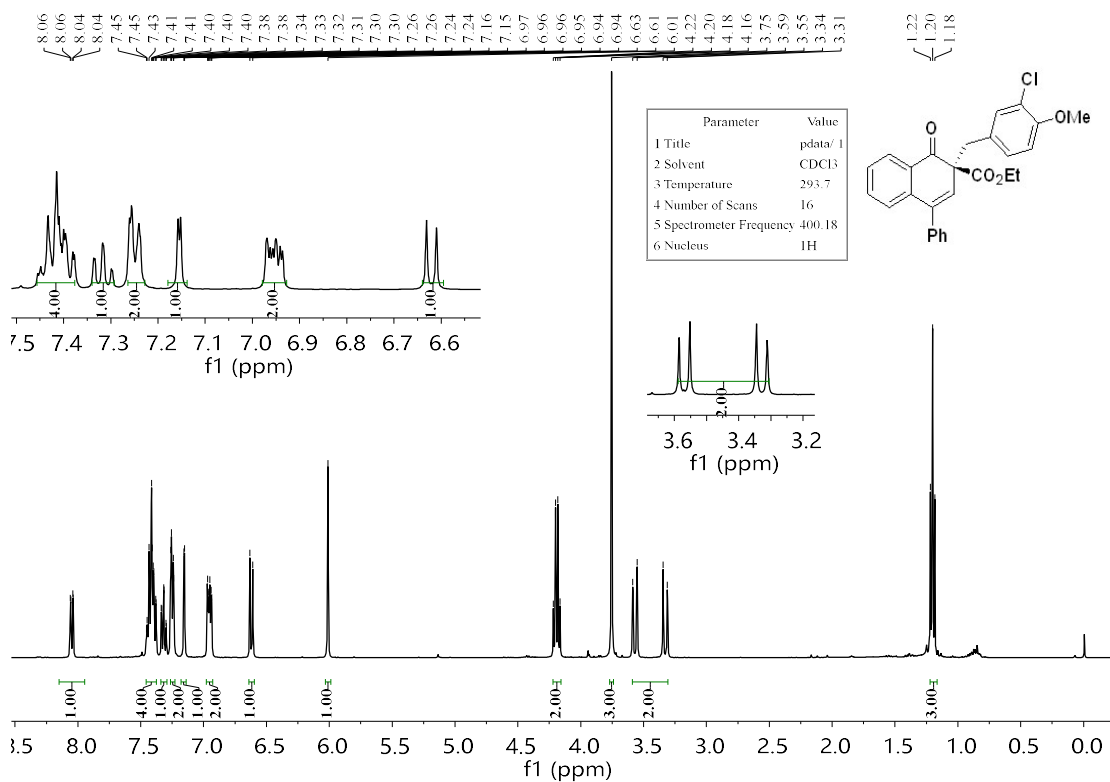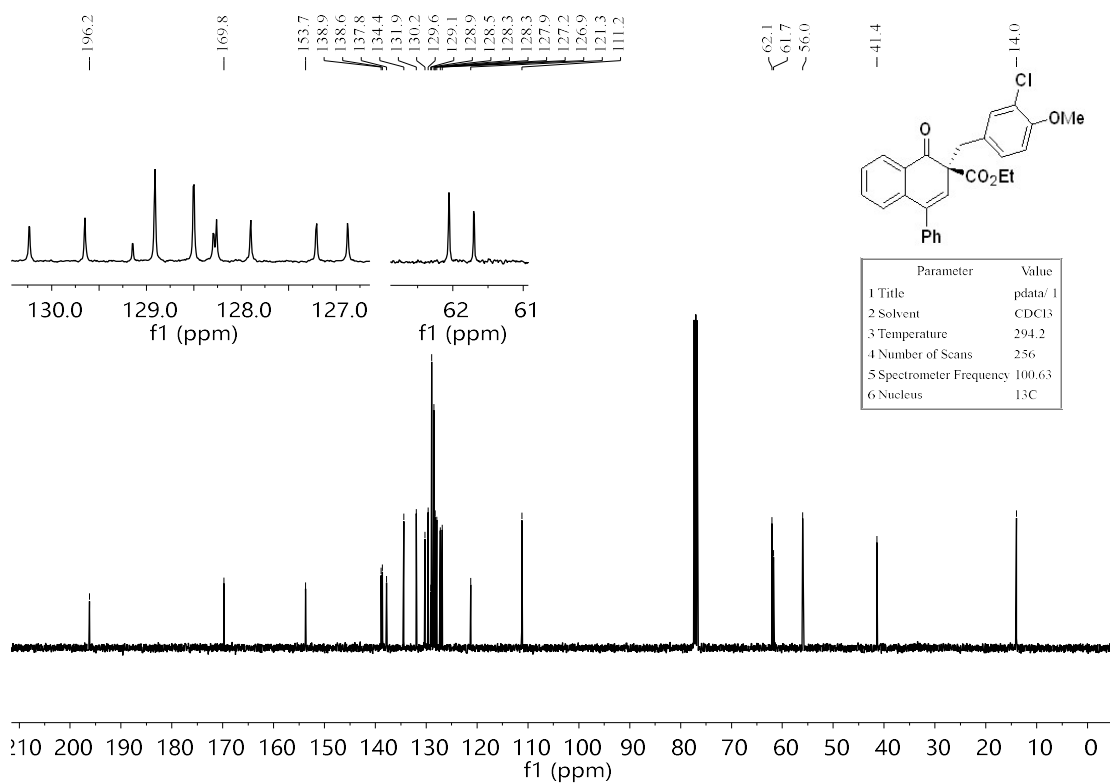



**Ethyl (S)-2-(3-bromo-4-methoxybenzyl)-1-oxo-4-phenyl-1,2-dihydronaphthalene-2-carboxylate (B37)**

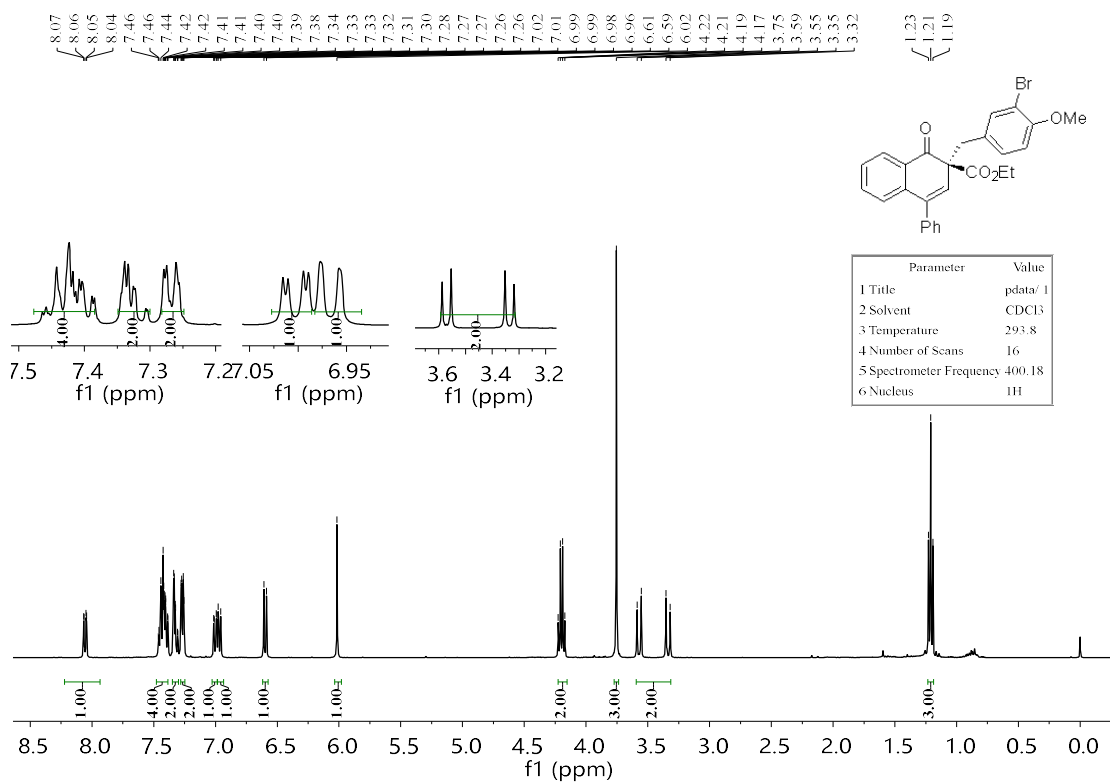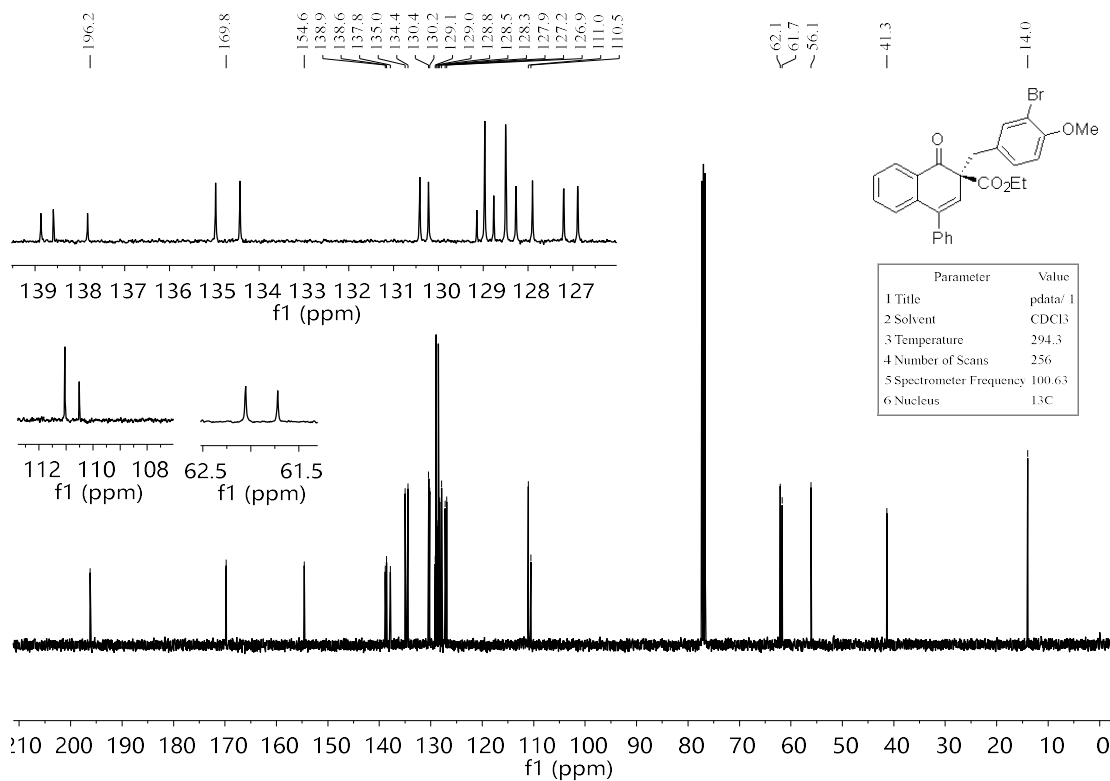

**Ethyl (S)-2-(benzofuran-5-ylmethyl)-1-oxo-4-phenyl-1,2-dihydronaphthalene-2-carboxylate (B38)**

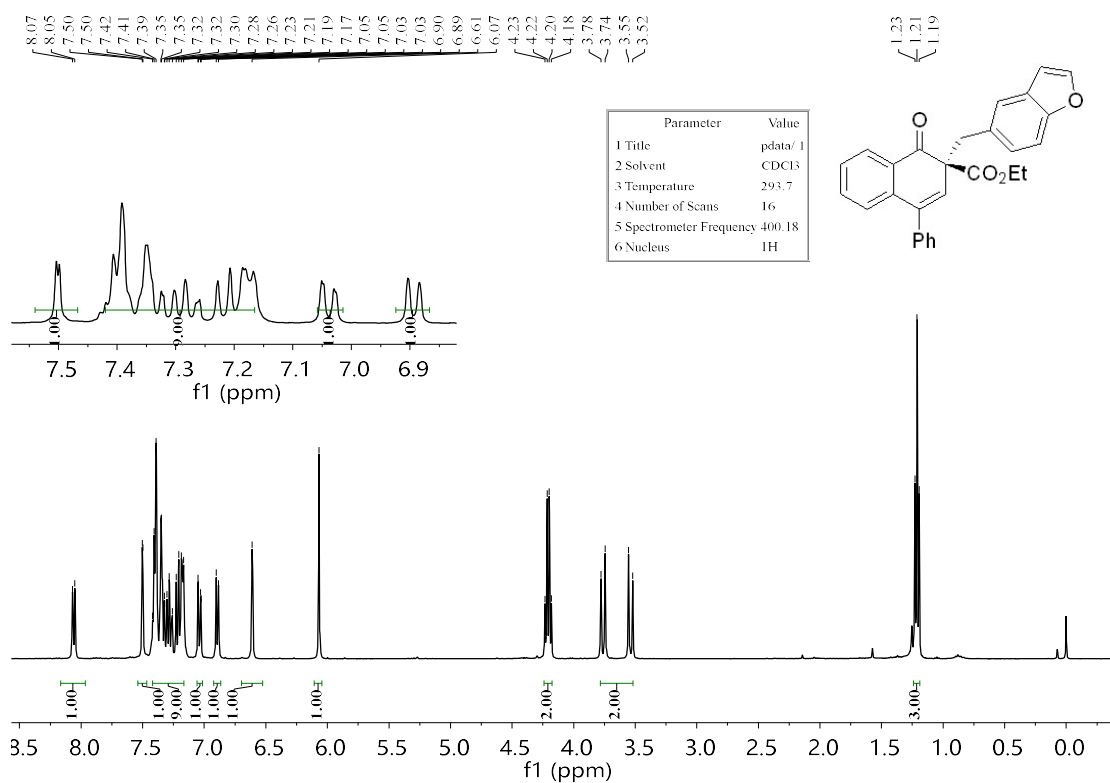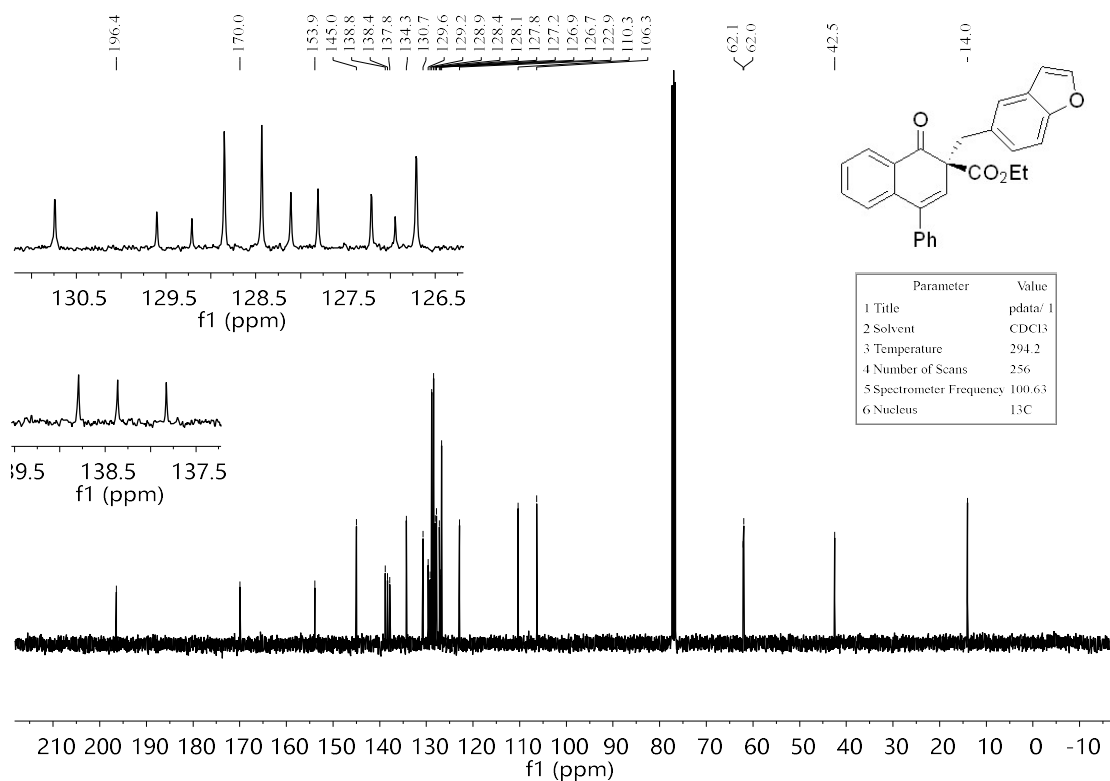

**Ethyl (S)-2-((2,3-dihydrobenzofuran-5-yl)methyl)-1-oxo-4-phenyl-1,2-dihydronaphthalene-2-carboxylate (B39)**

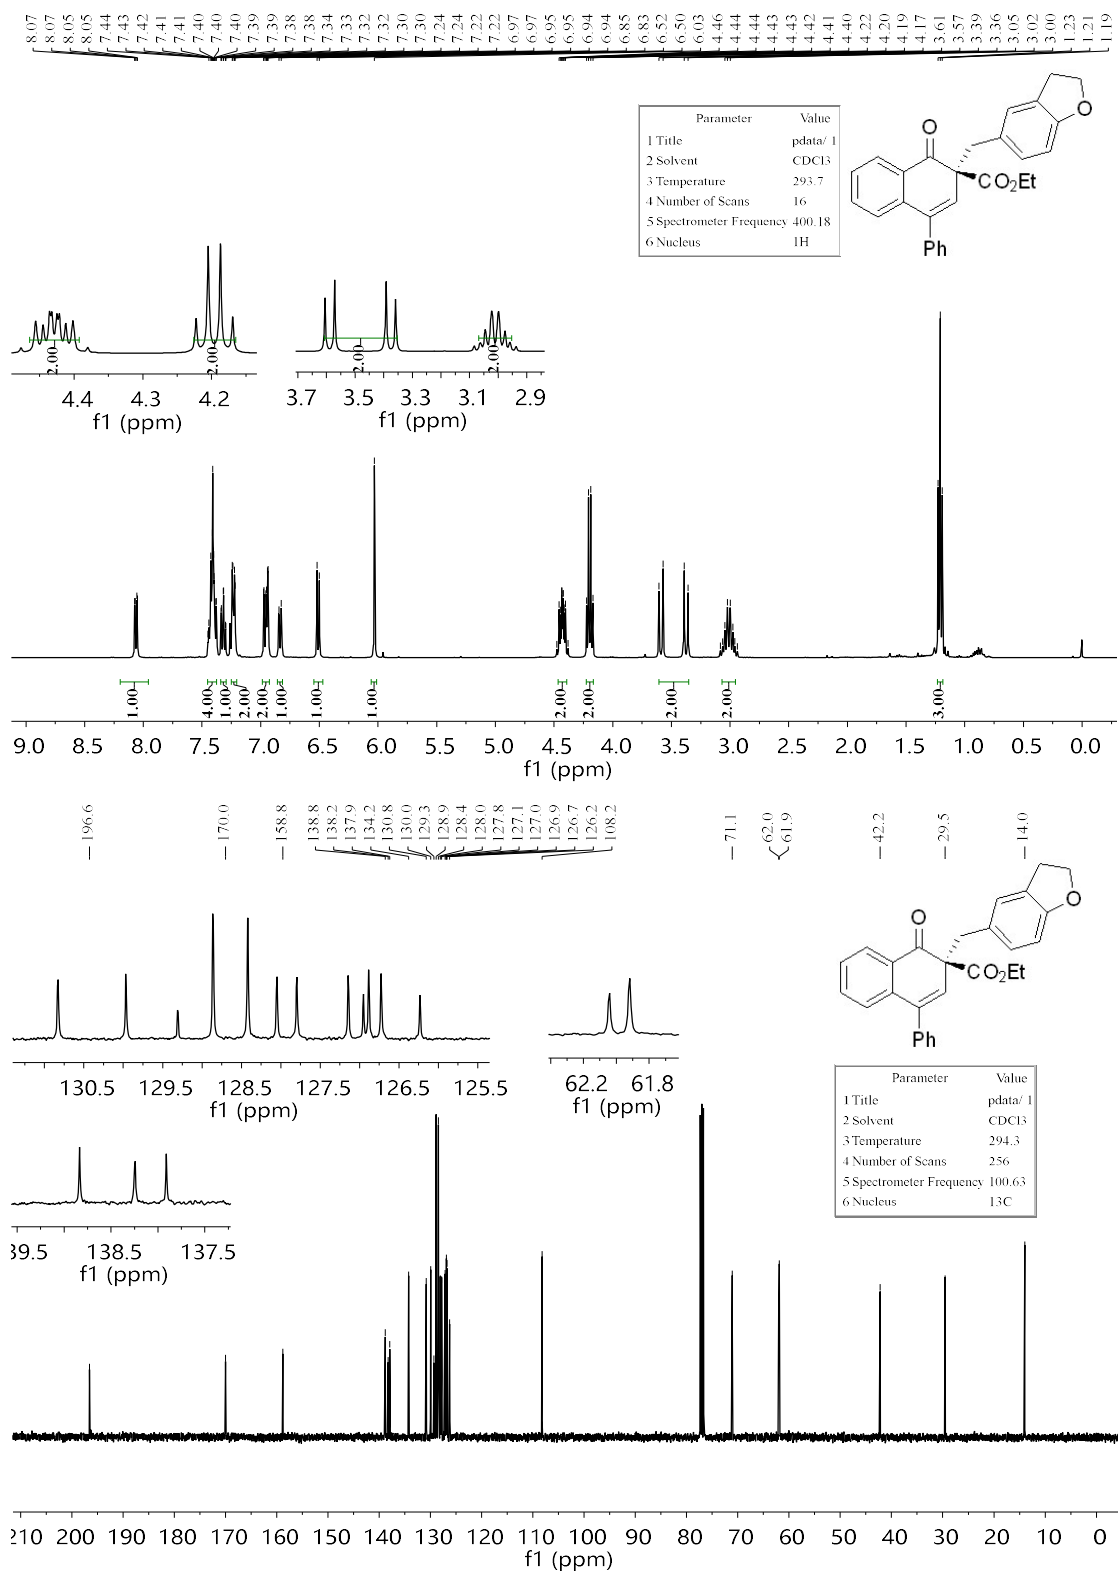

**Ethyl (S)-2-(benzo[d][1,3]dioxol-5-ylmethyl)-1-oxo-4-phenyl-1,2-dihydronaphthalene-2-carboxylate (B40)**

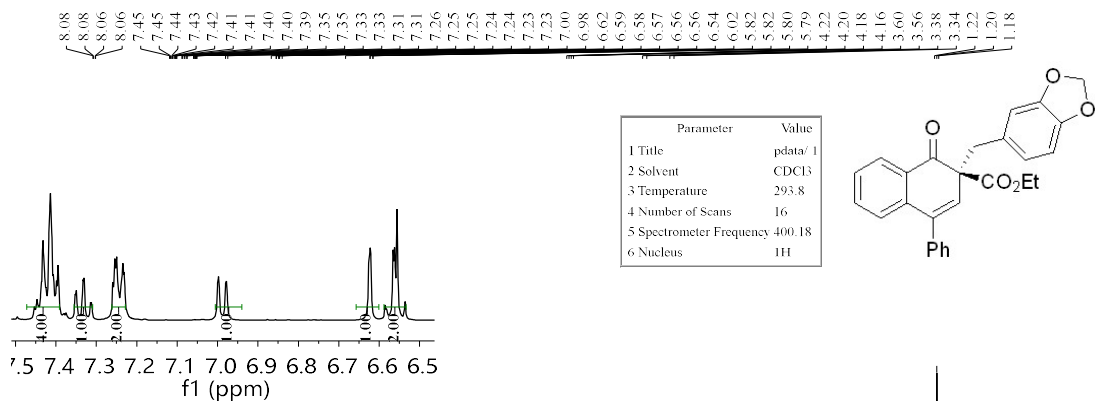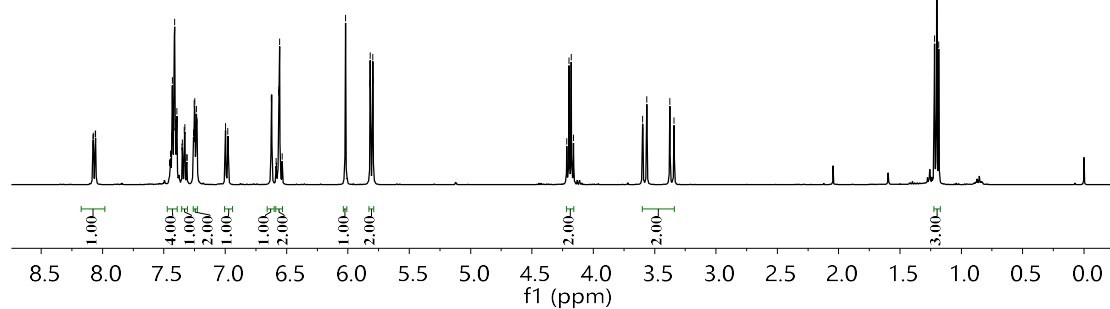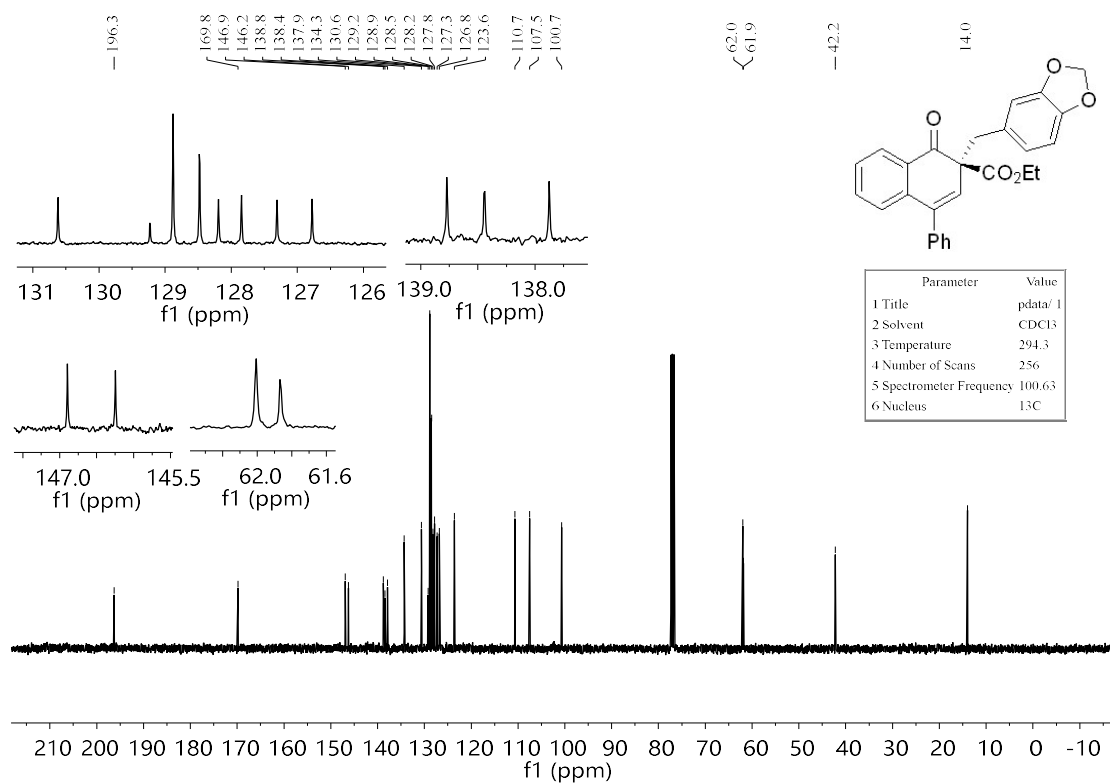

**Ethyl (S)-2-((2,3-dihydrobenzo[b][1,4]dioxin-6-yl)methyl)-1-oxo-4-phenyl-1,2-dihydronaphthalene-2-carboxylate (B41)**

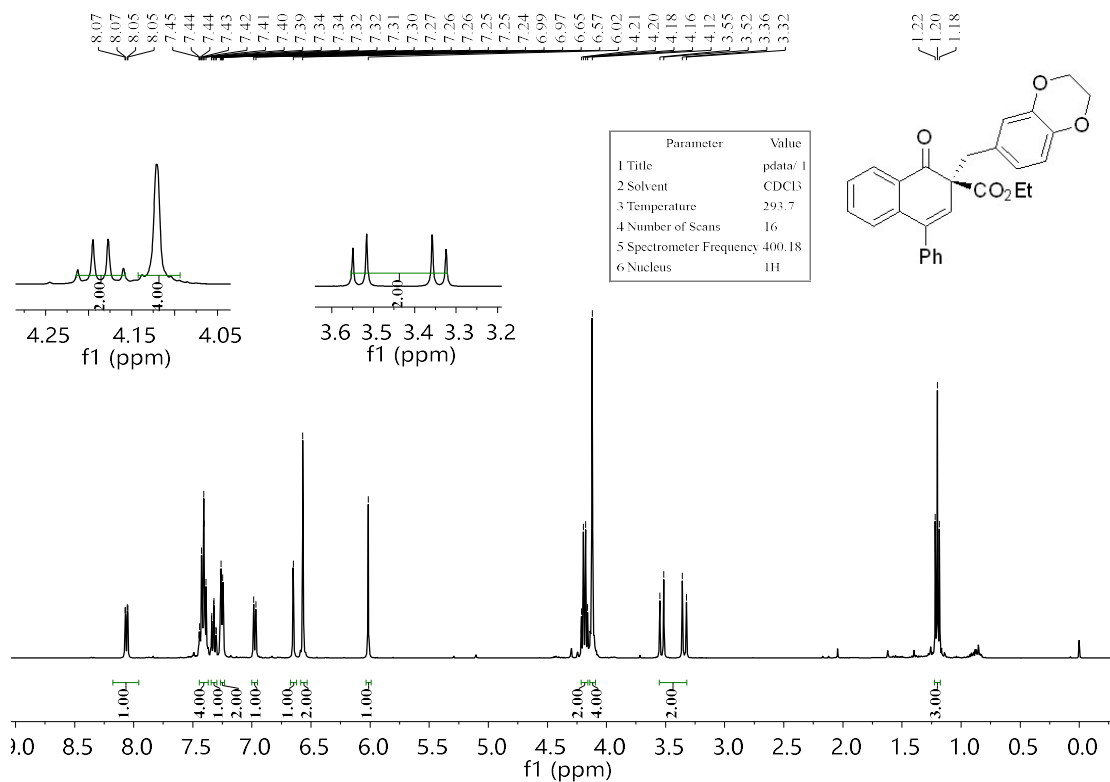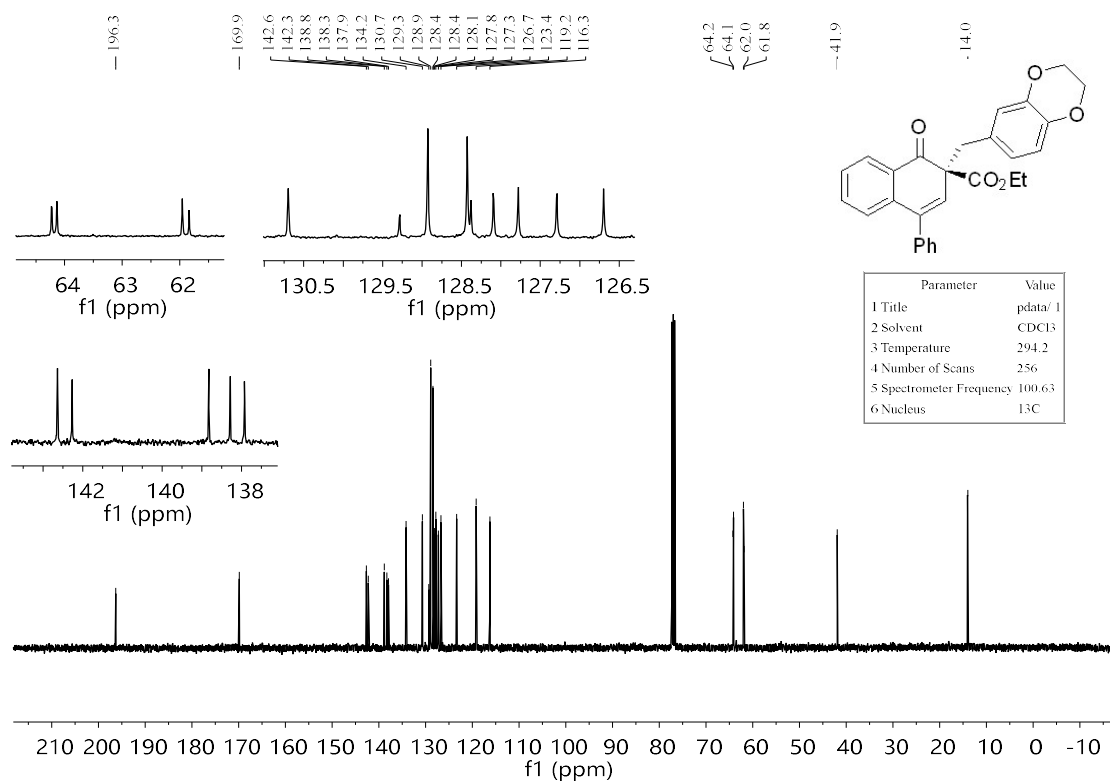

**Ethyl (S)-2-((4-methoxynaphthalen-1-yl)methyl)-1-oxo-4-phenyl-1,2-dihydronaphthalene-2-carboxylate (B42)**

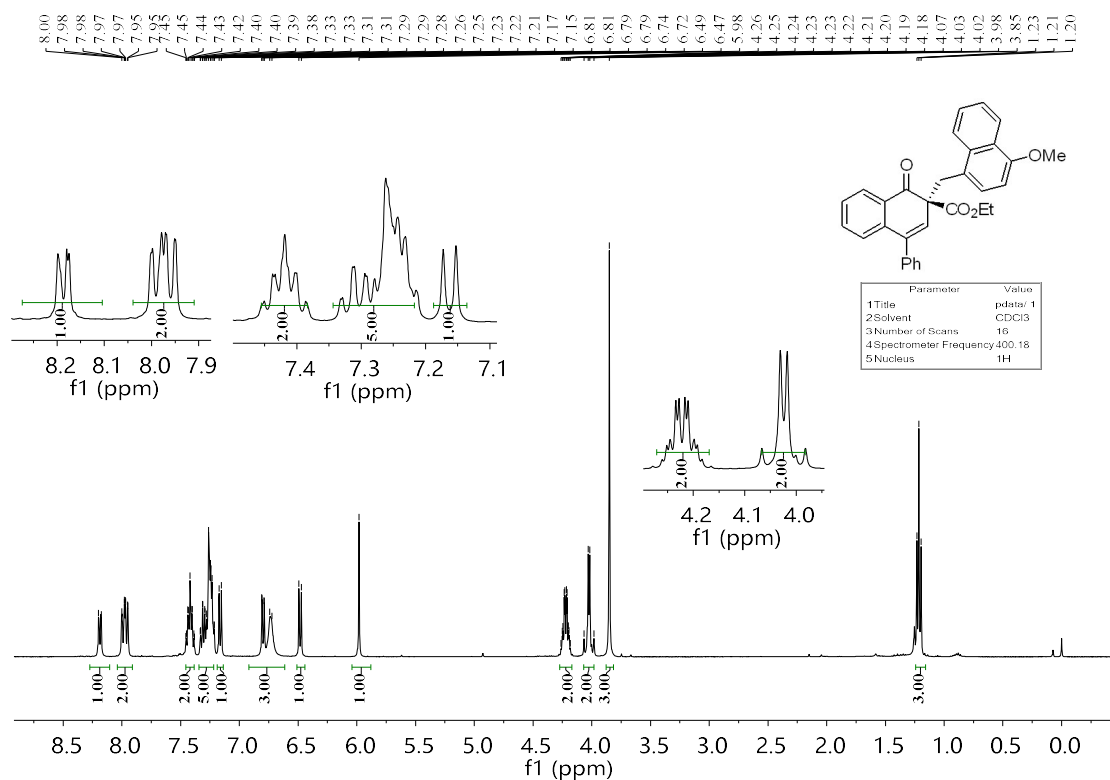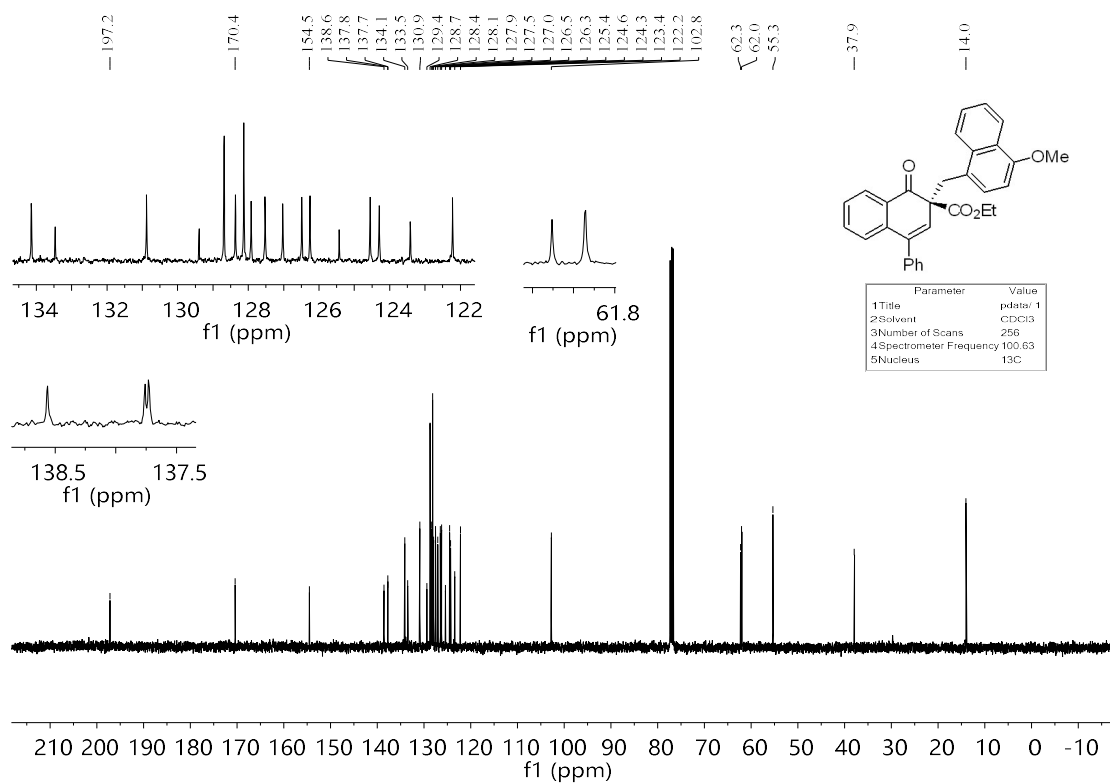

**Ethyl (S)-1-oxo-4-phenyl-2-(thiophen-2-ylmethyl)-1,2-dihydronaphthalene-2-carboxylate (B43)**

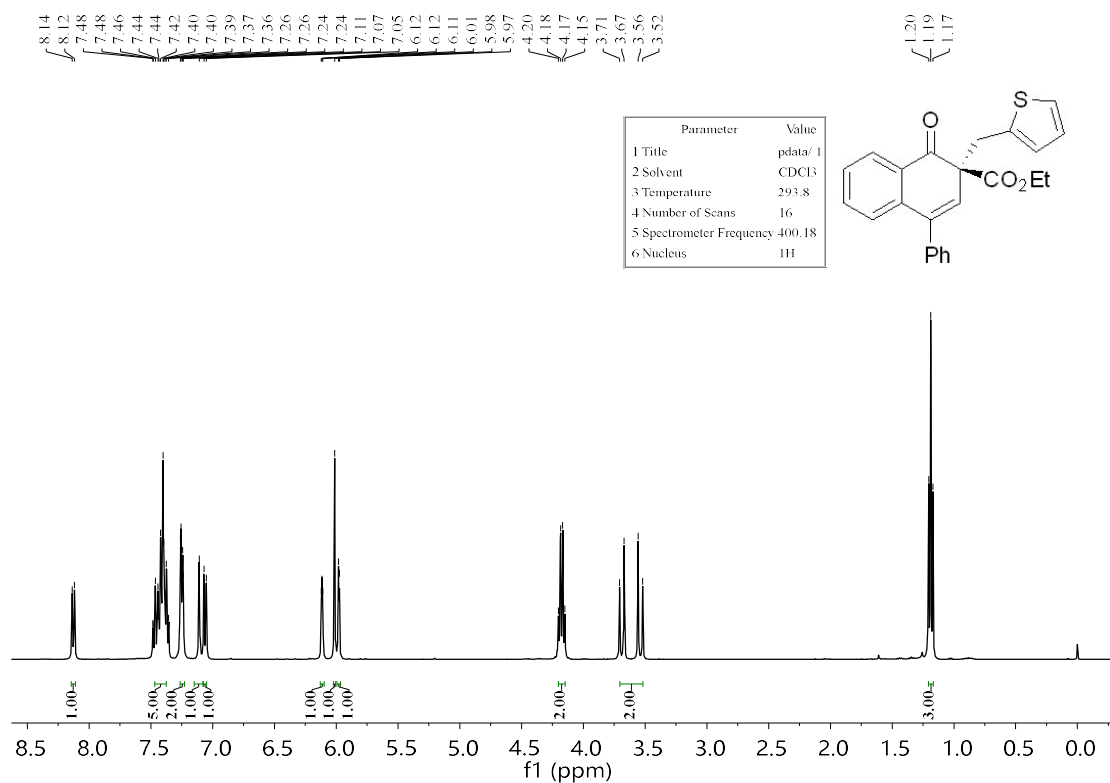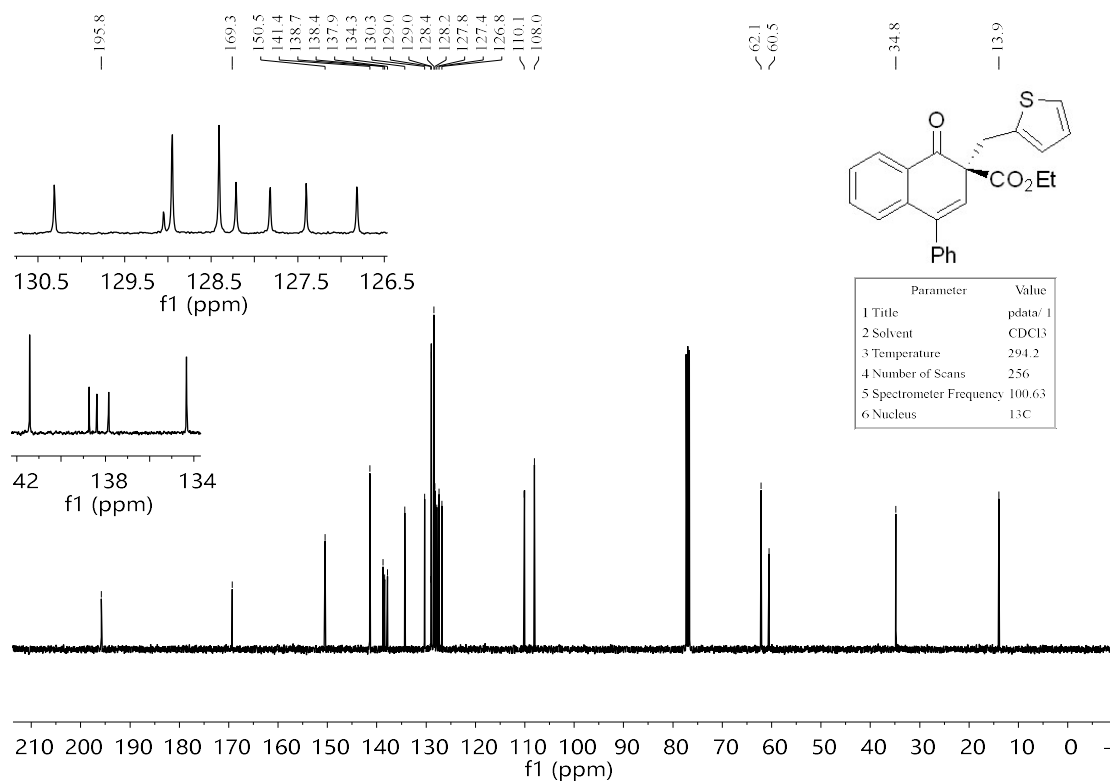

**Ethyl (S)-2-(furan-2-ylmethyl)-1-oxo-4-phenyl-1,2-dihydronaphthalene-2-carboxylate (B44)**

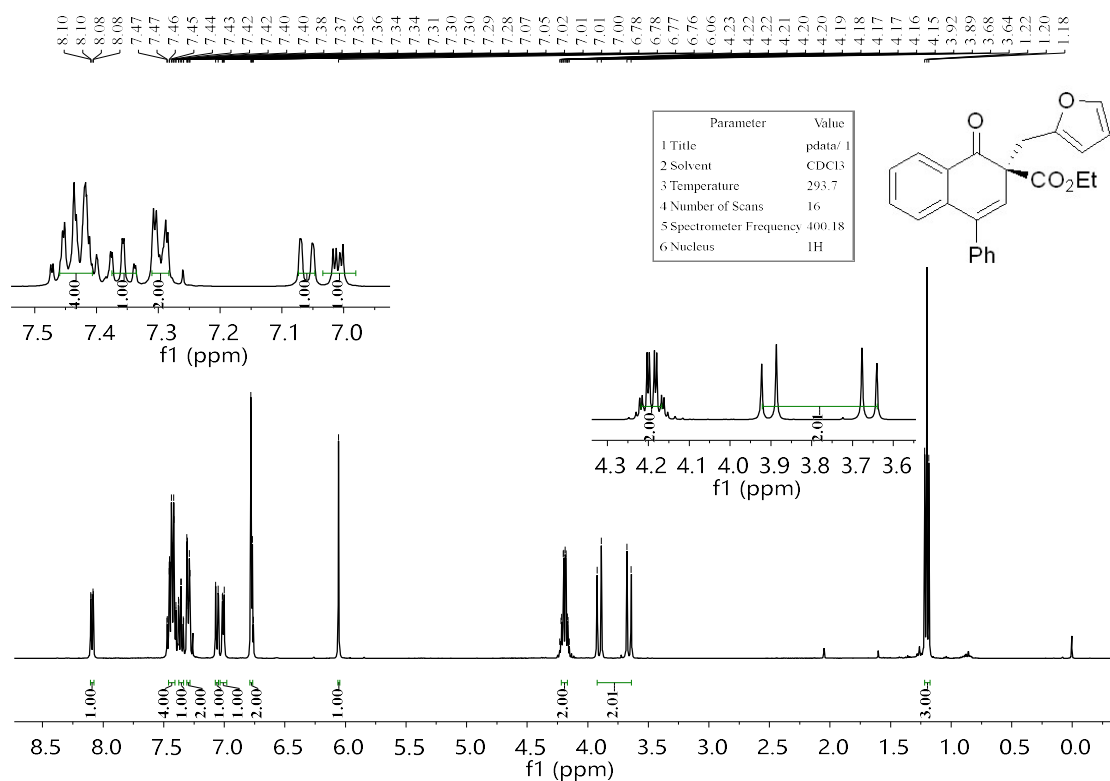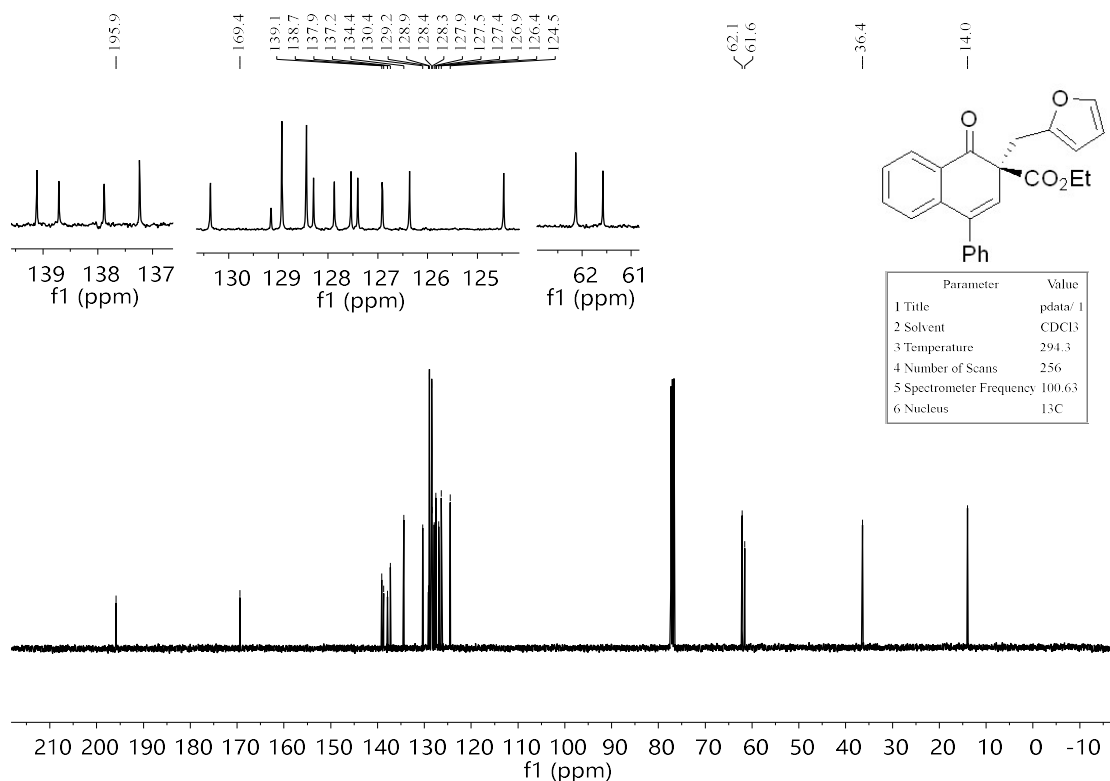



ethyl 1-hydroxy-4-(1-(4-methoxyphenyl)ethyl)-2-naphthoate (B45)

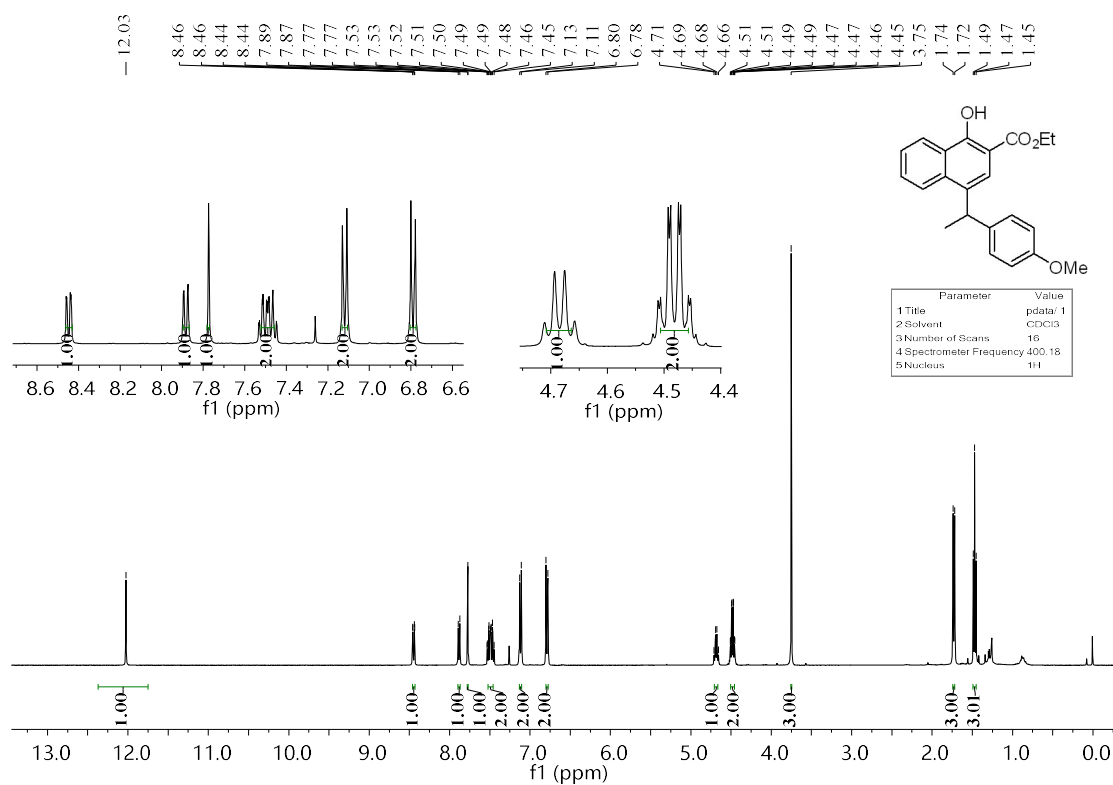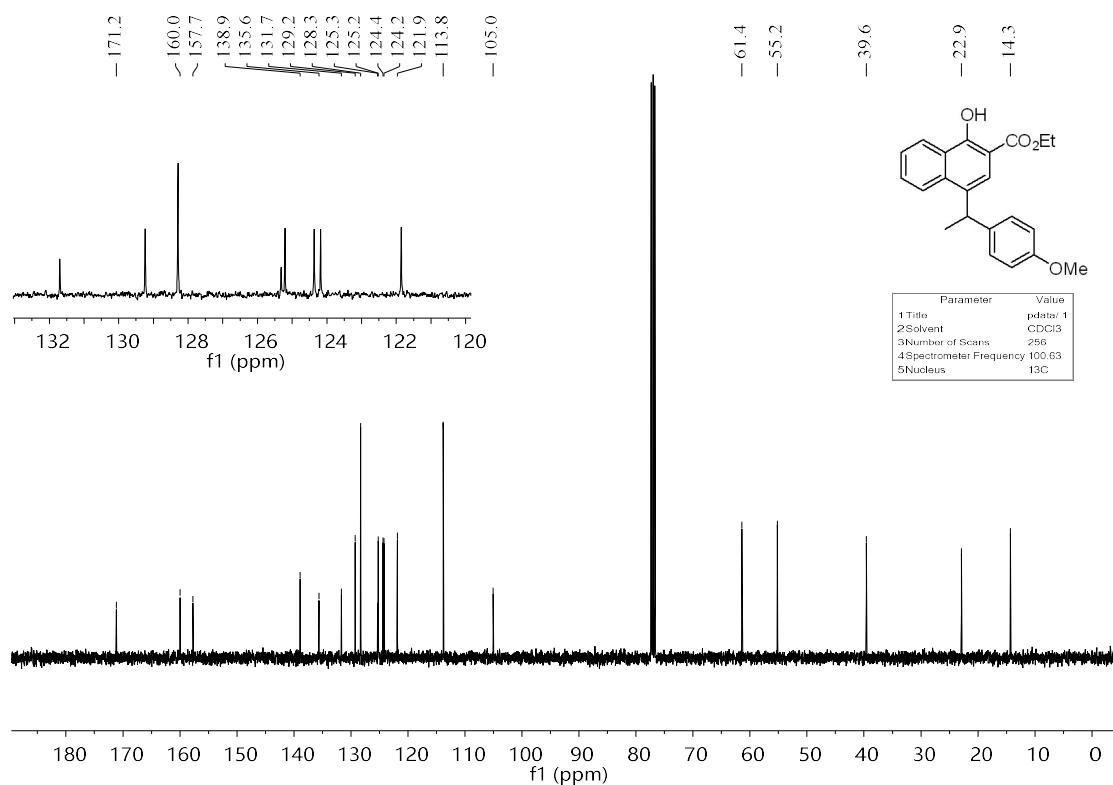

**Ethyl (1S,2S)-1-hydroxy-2-(4-methoxybenzyl)-4-phenyl-1,2-dihydronaphthalene-2-carboxylate (C1)**

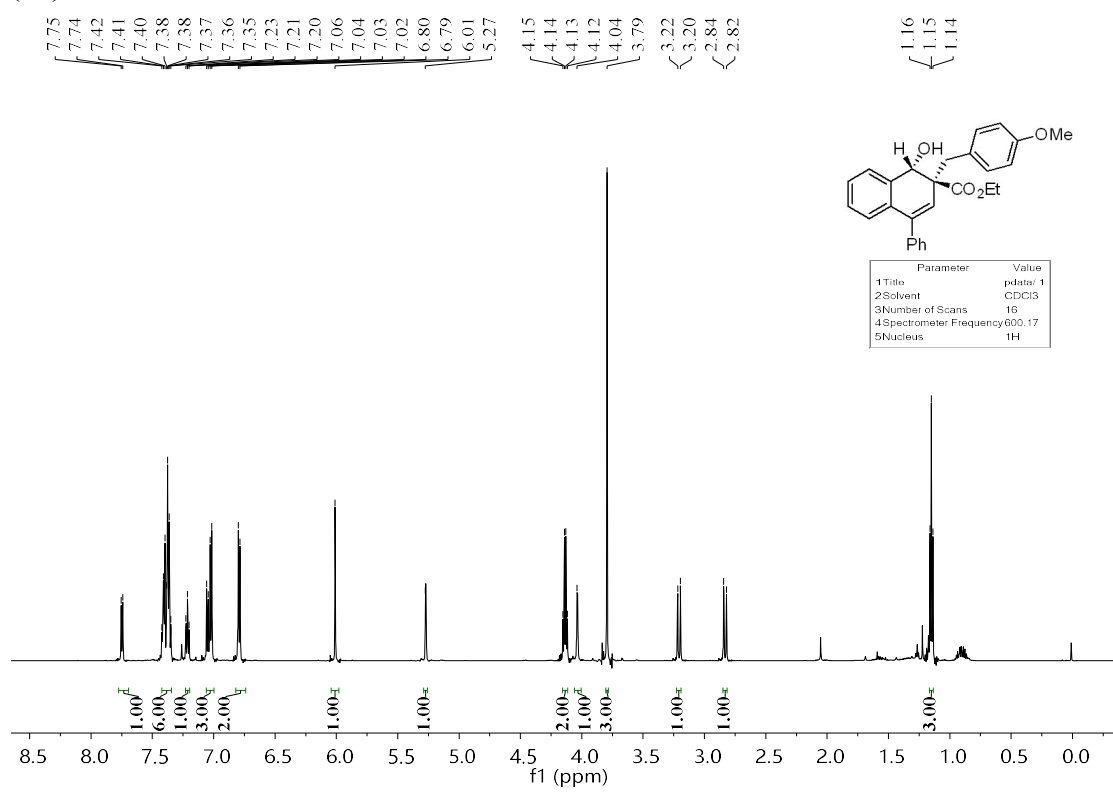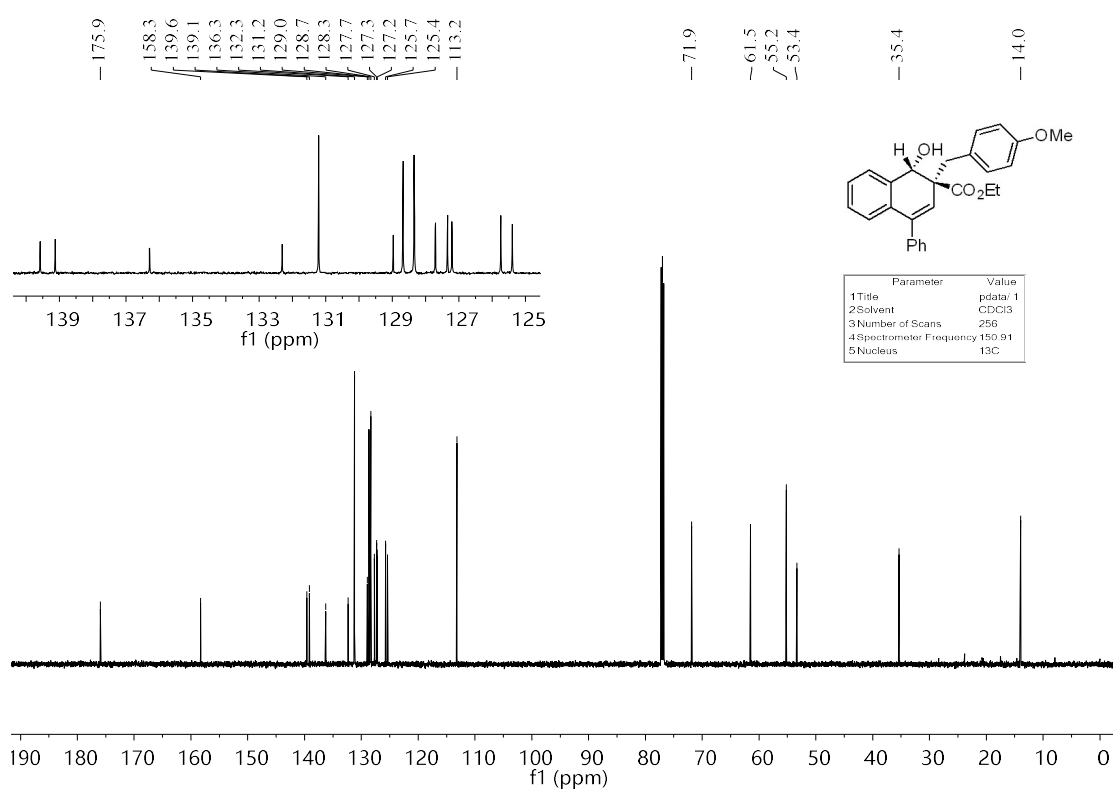

NOESY spectra of C1 in CDCl<sub>3</sub> (600 MHz)

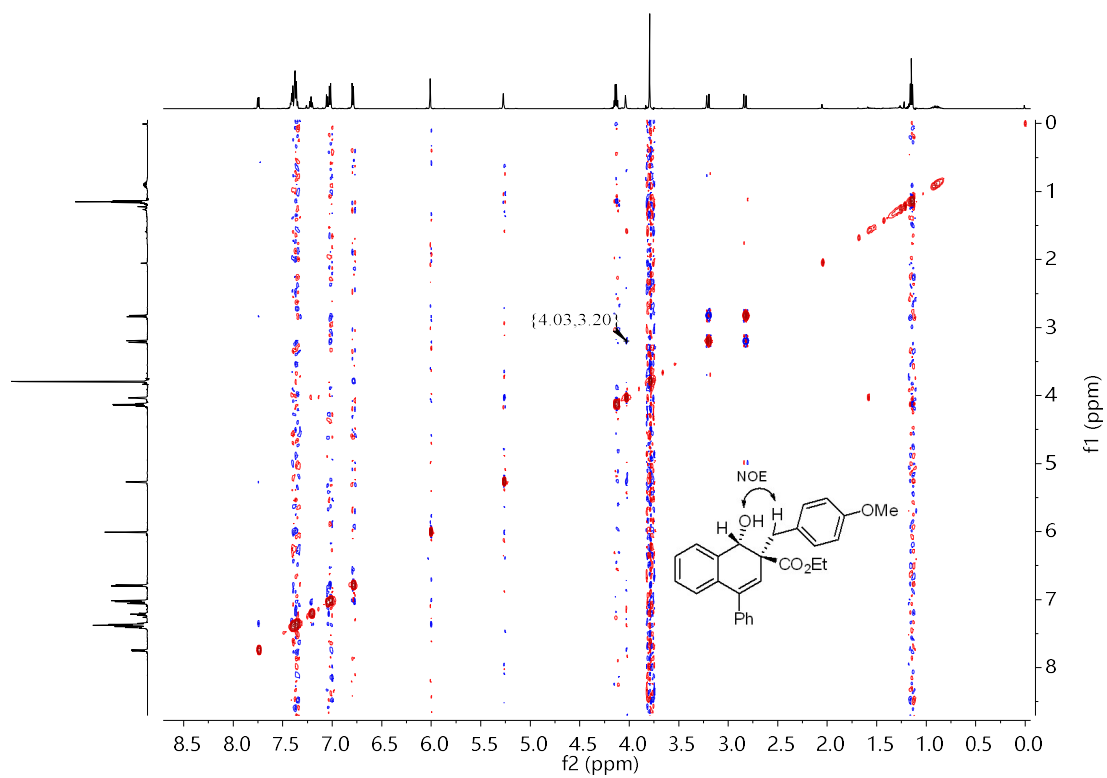

**Ethyl (1S,2S)-1-hydroxy-2-(4-methoxybenzyl)-4-phenyl-1-vinyl-1,2-dihydronaphthalene-2-carboxylate (C2)**

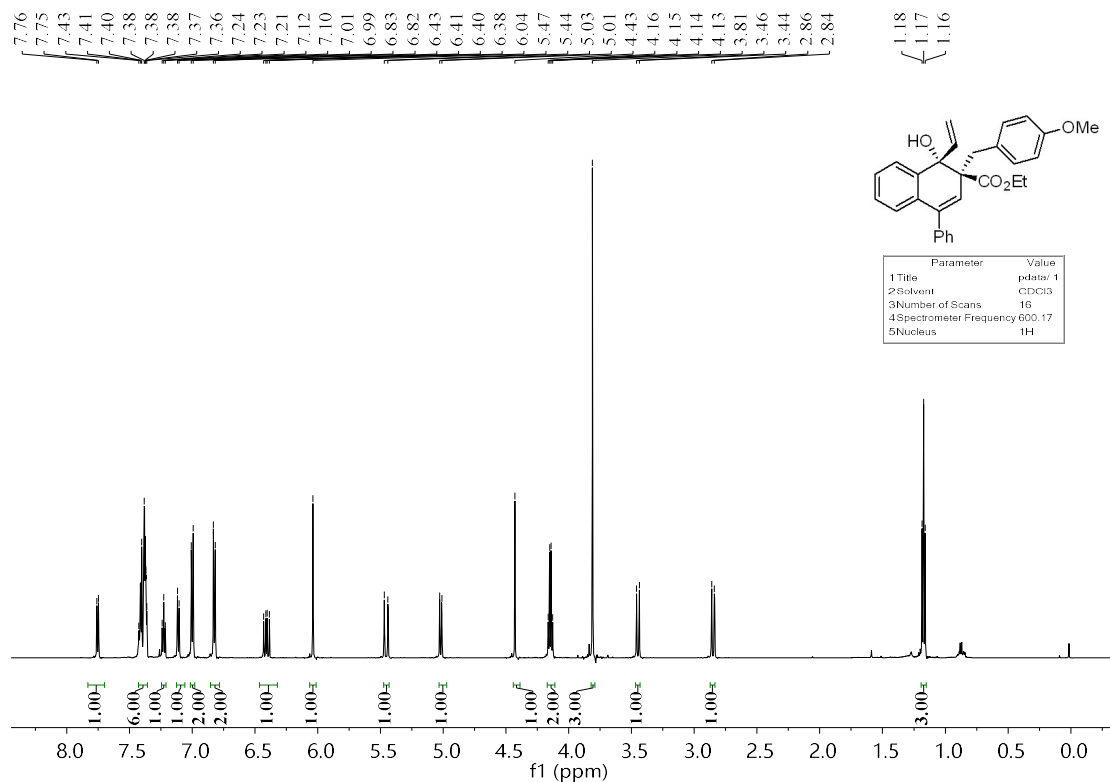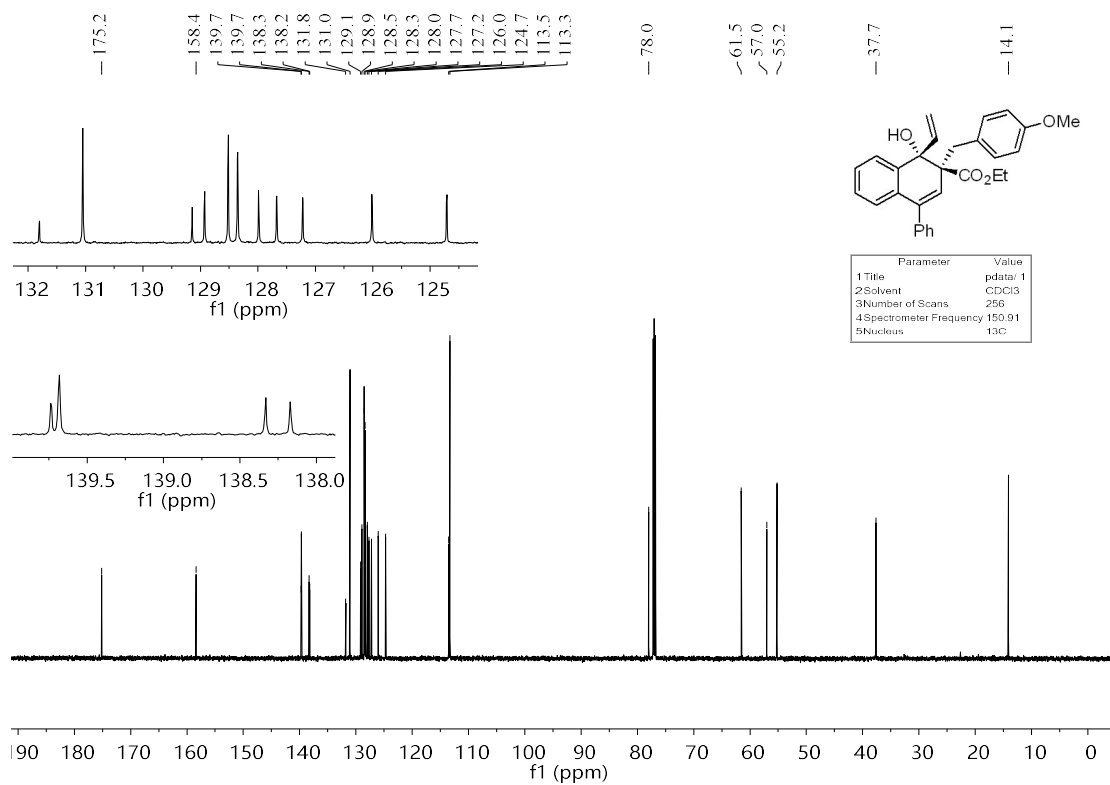

NOESY spectra of C2 in CDCl<sub>3</sub> (600 MHz)

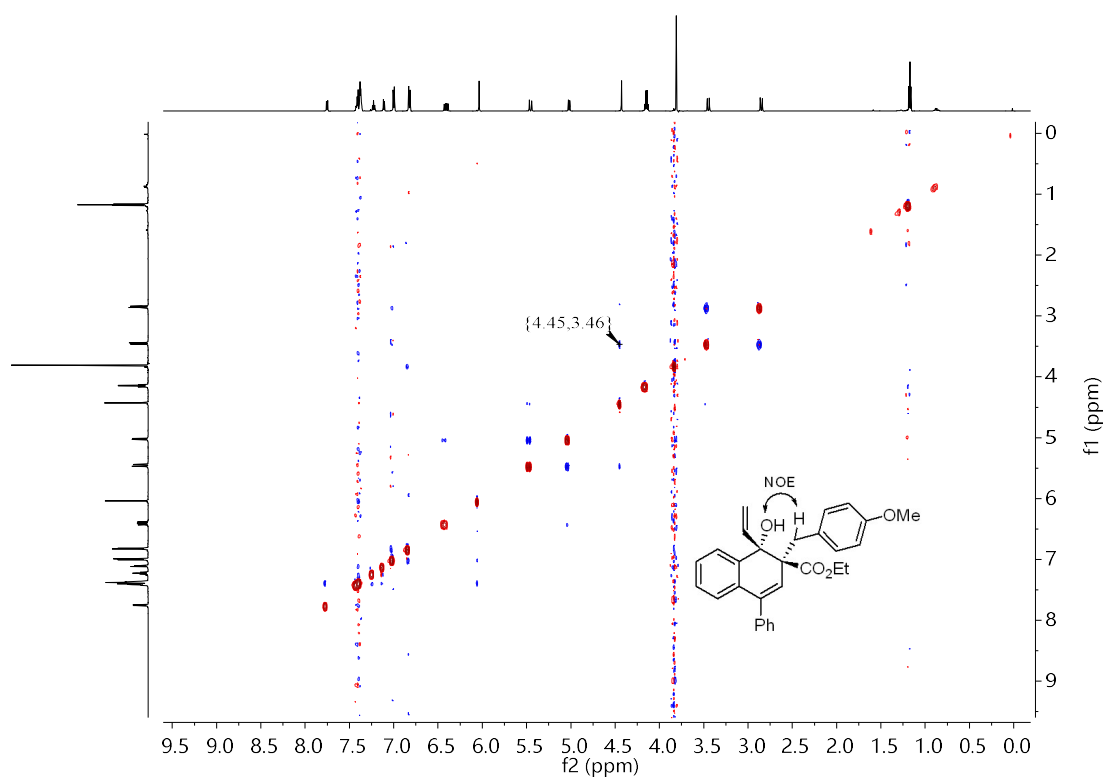

**Ethyl (1aR,2S,7bS)-2-(4-methoxybenzyl)-3-oxo-7b-phenyl-1a,2,3,7b-tetrahydronaphtho[1,2-b]oxirene-2-carboxylate (C3)**

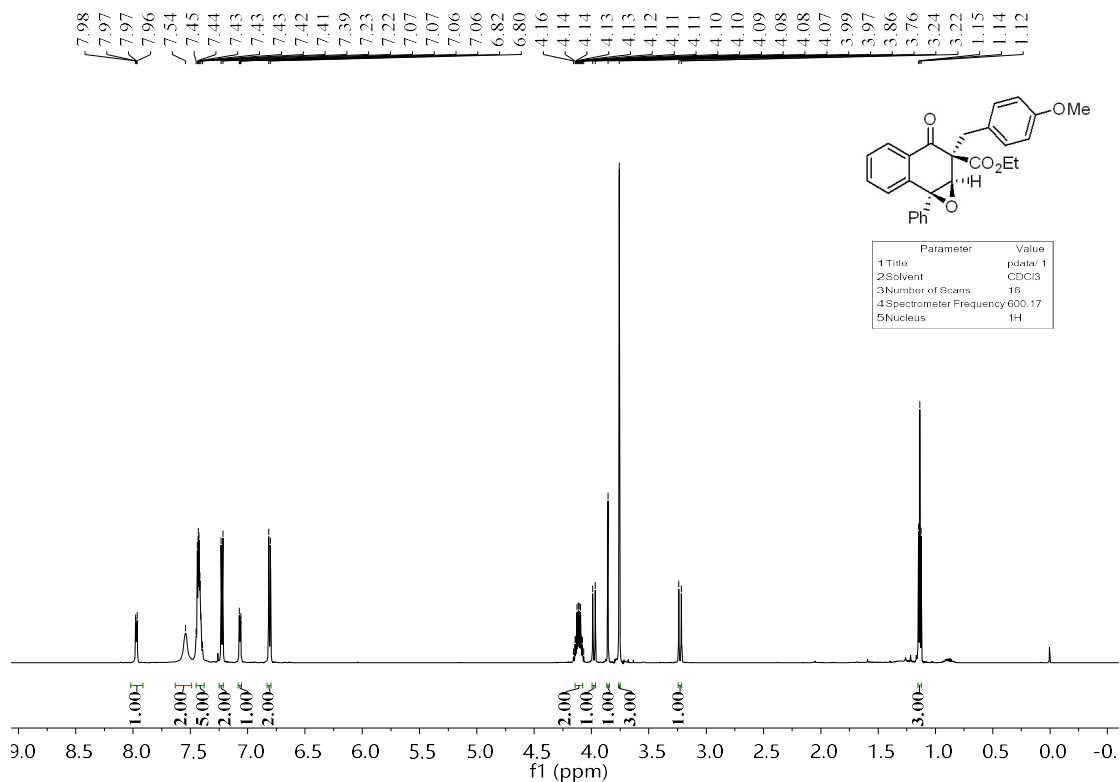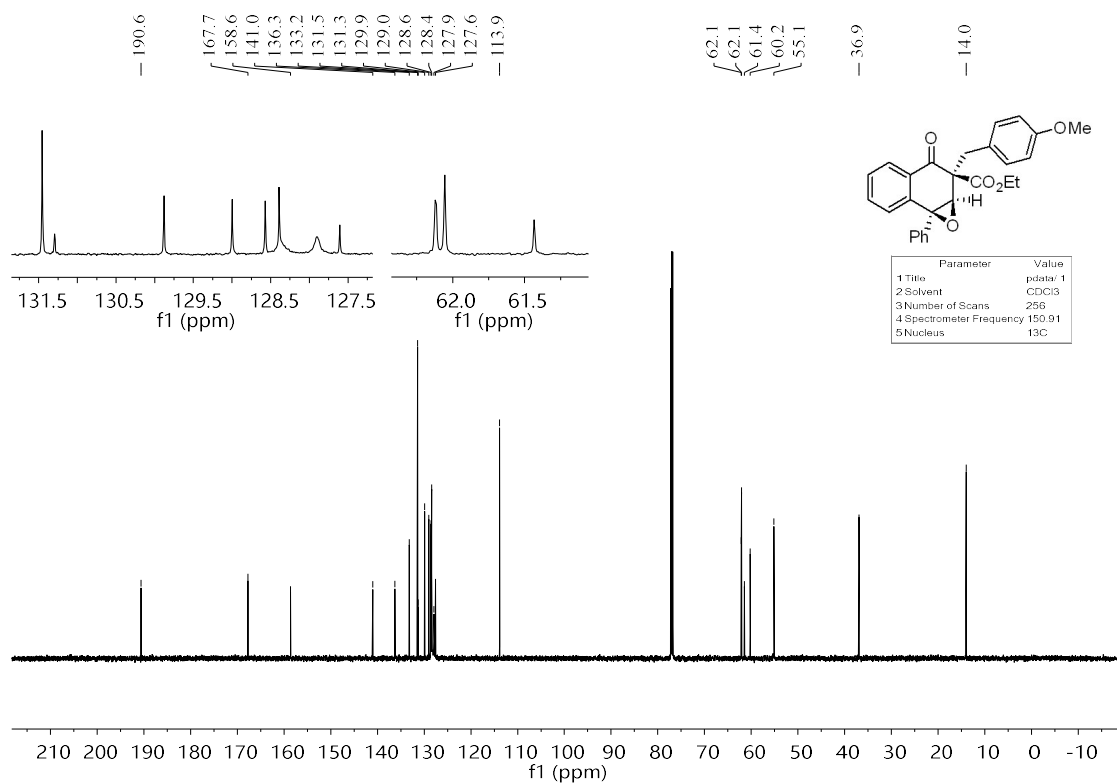

NOESY spectra of C3 in CDCl<sub>3</sub> (600 MHz)

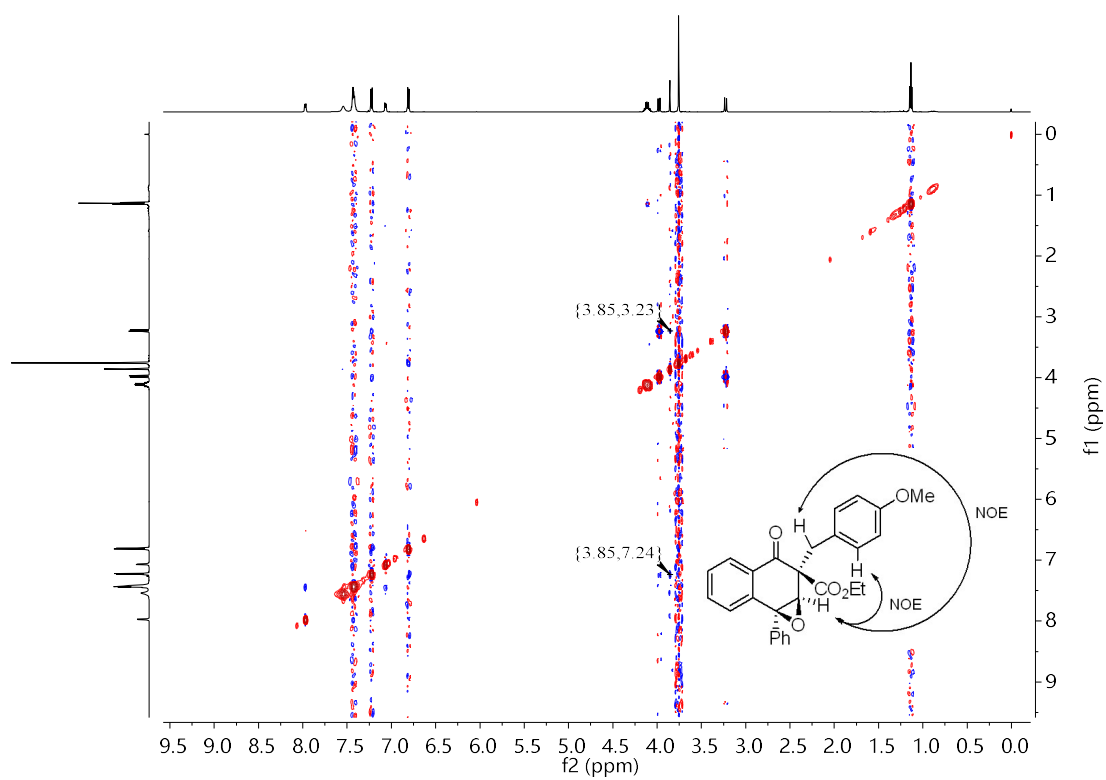

## 12. Copies of NMR Spectra for the Reaction Substrates

### Ethyl 1-((4-methoxybenzyl)oxy)-4-phenyl-2-naphthoate (A1)

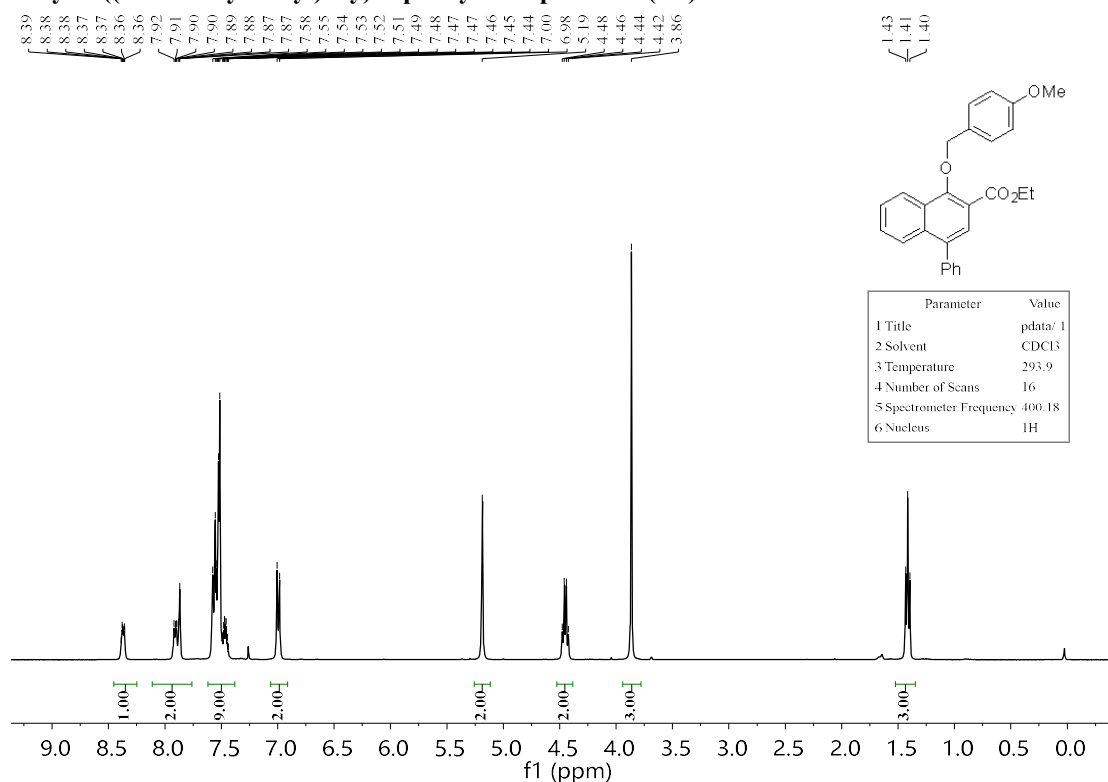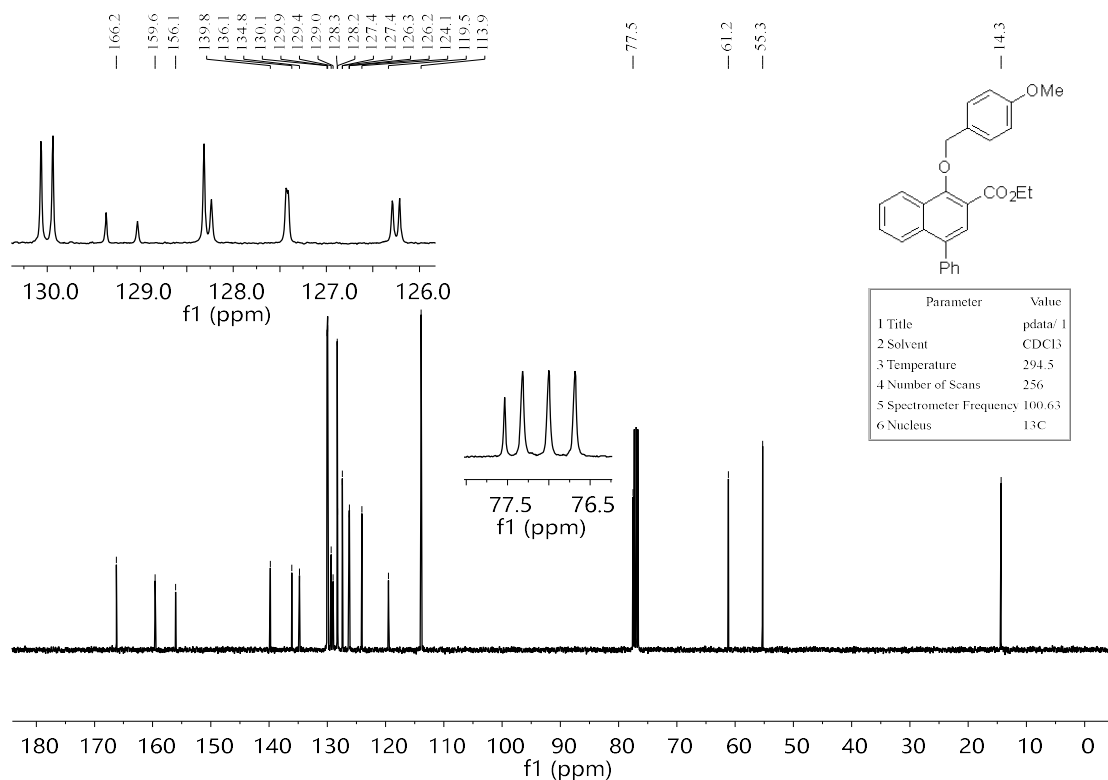



### Methyl 1-((4-methoxybenzyl)oxy)-4-phenyl-2-naphthoate (A2)

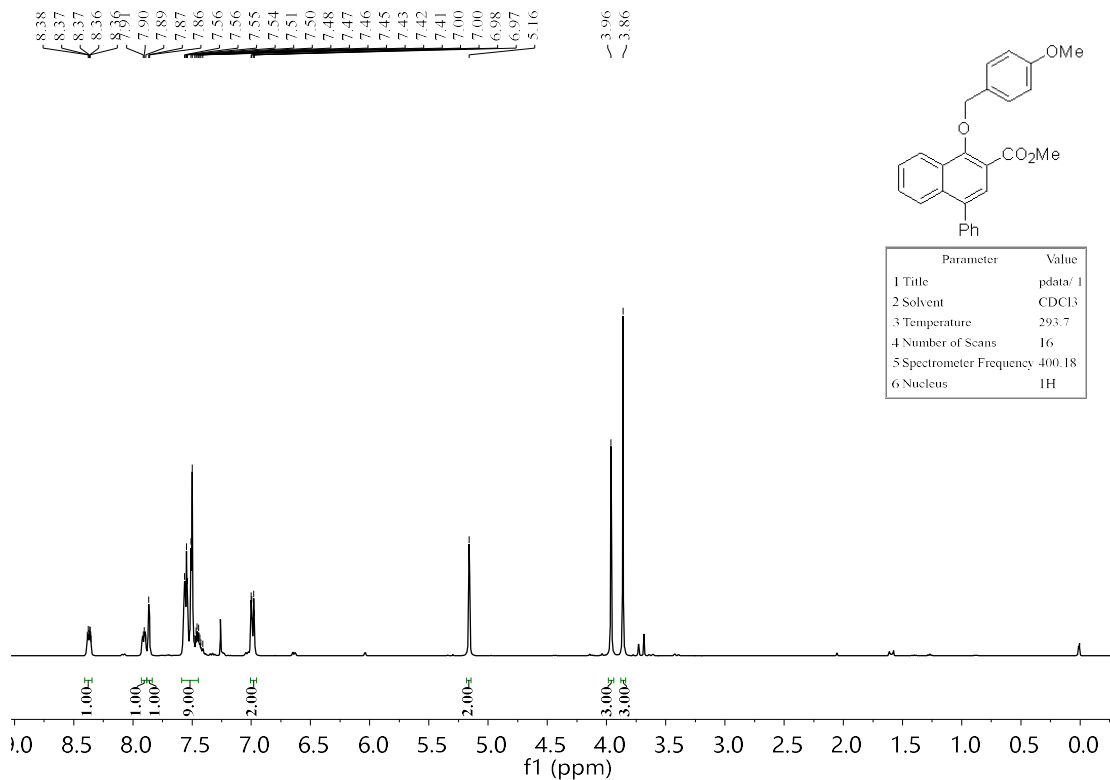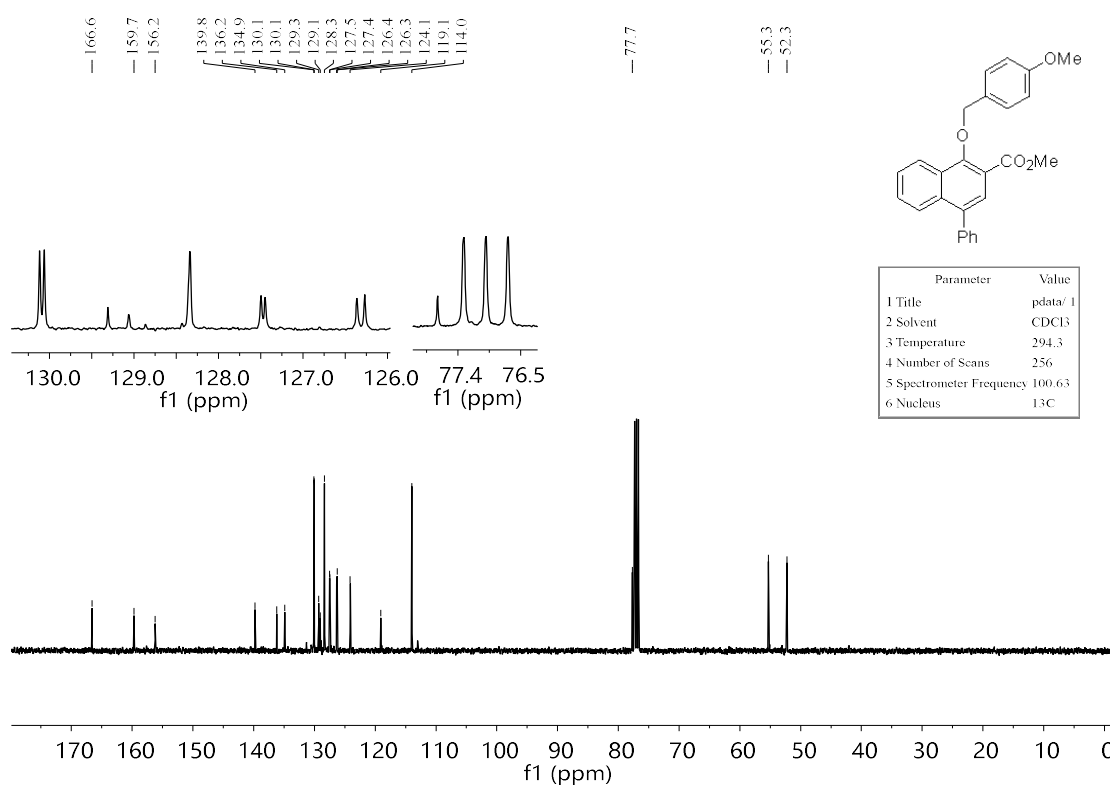

### Isopropyl 1-((4-methoxybenzyl)oxy)-4-phenyl-2-naphthoate (A3)

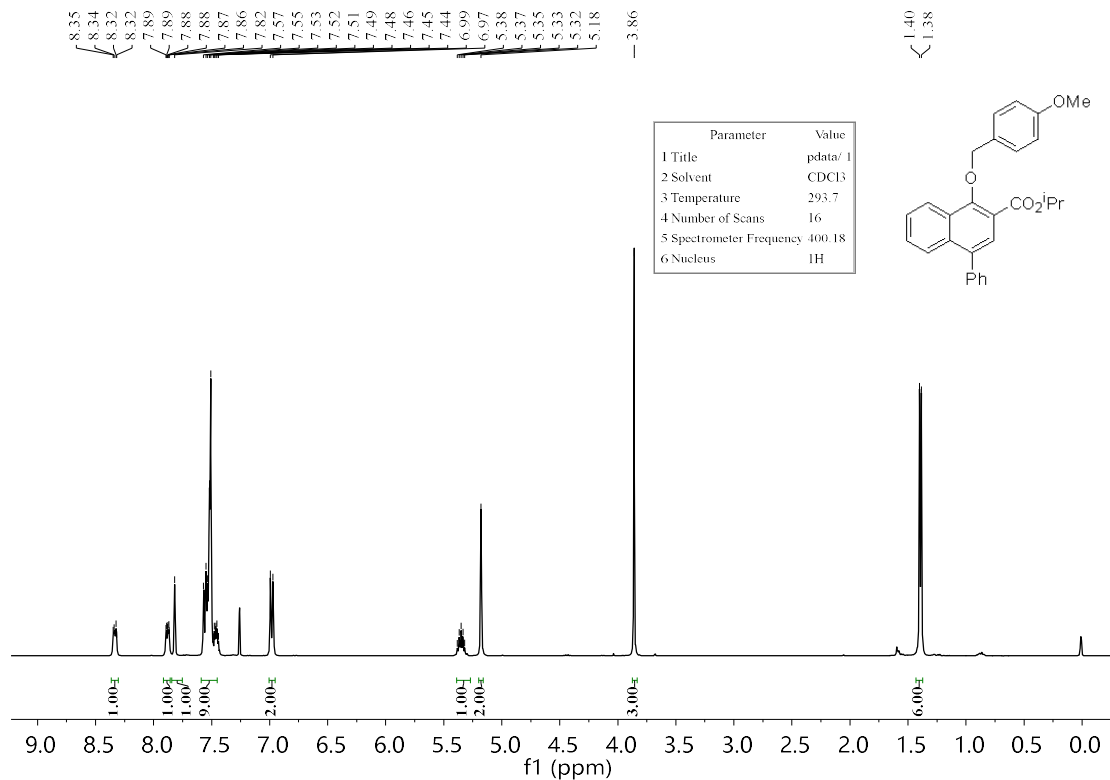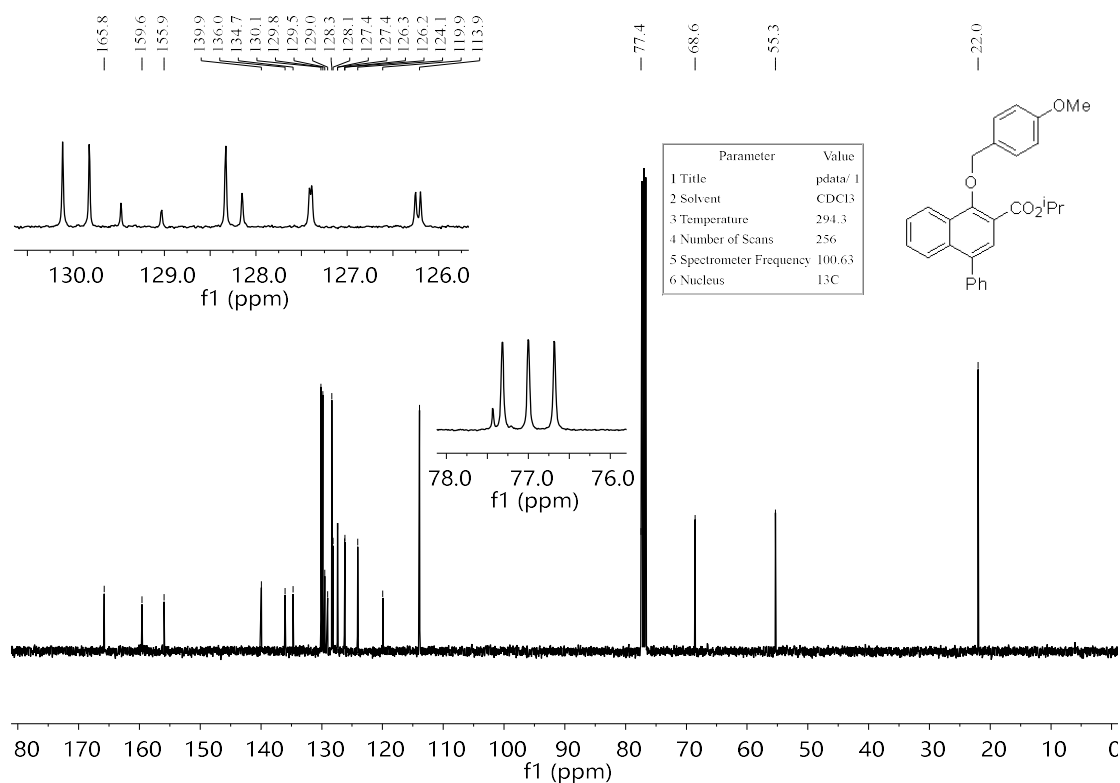

### Benzyl 1-((4-methoxybenzyl)oxy)-4-phenyl-2-naphthoate (A4)

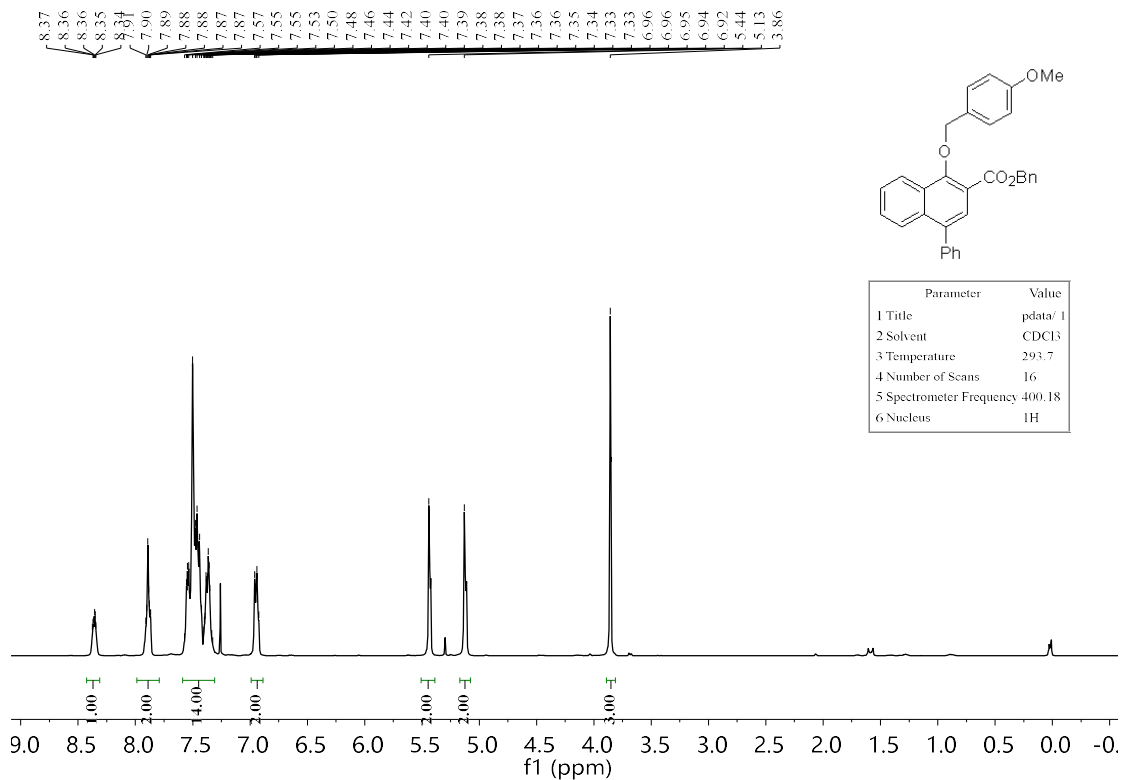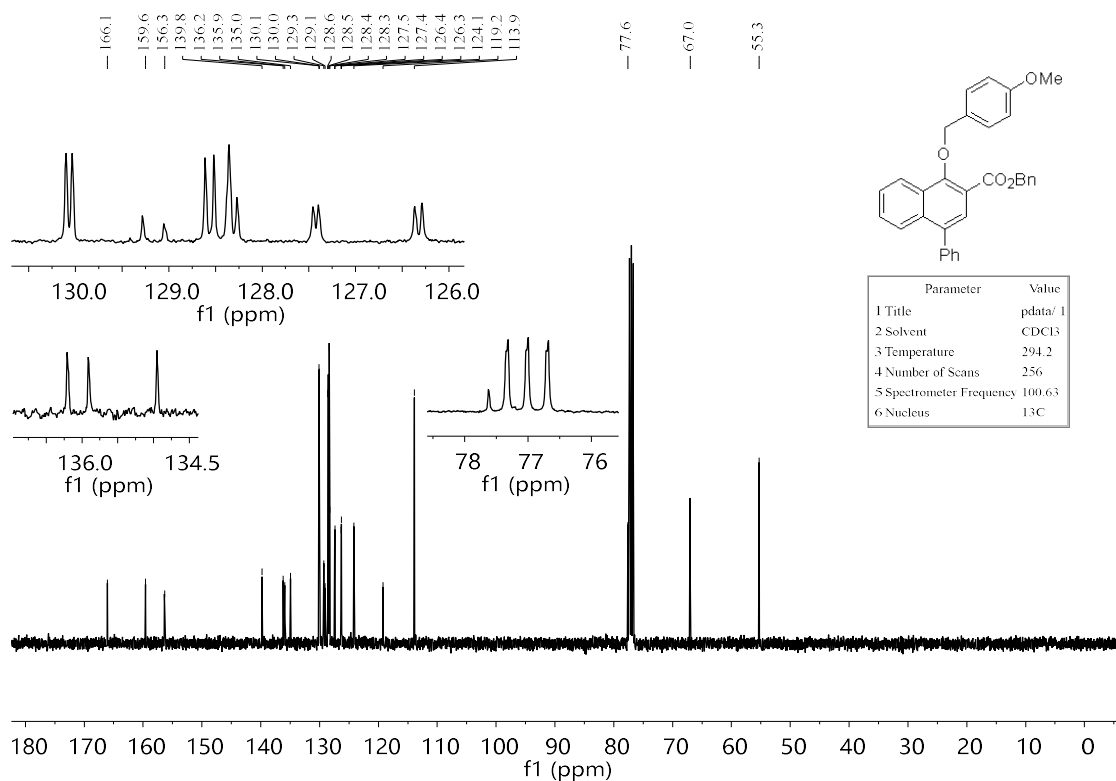

### Adamantan-1-yl 1-((4-methoxybenzyl)oxy)-4-phenyl-2-naphthoate (A5)

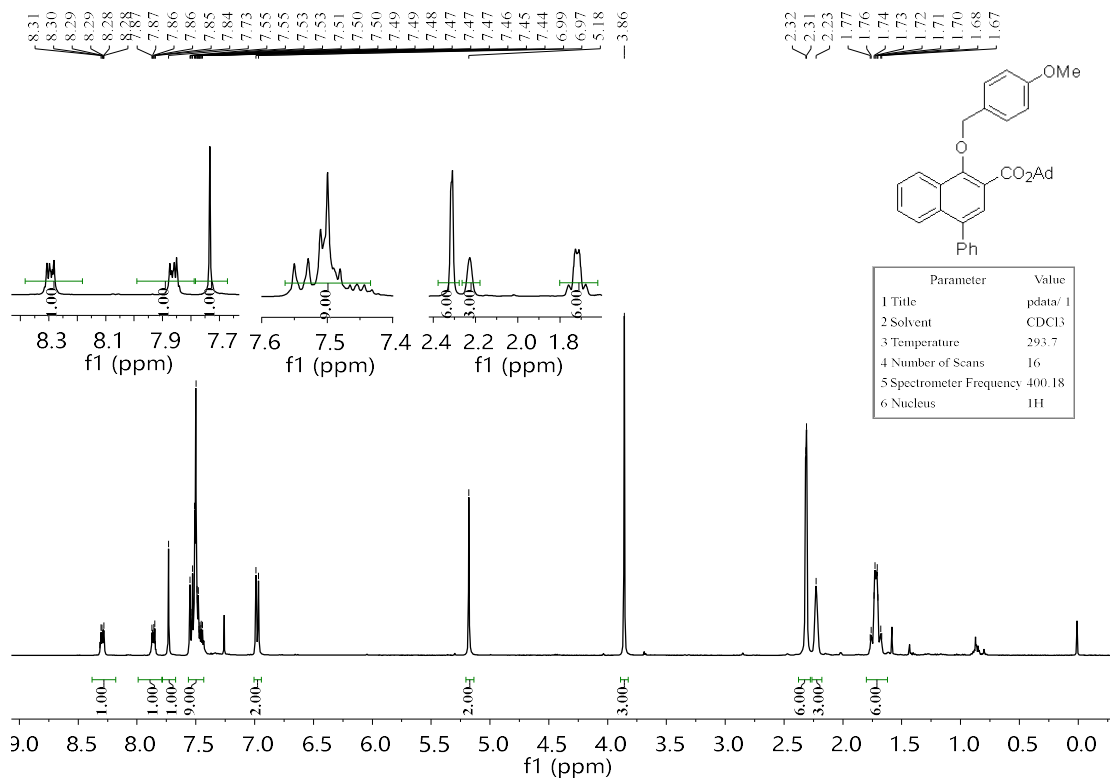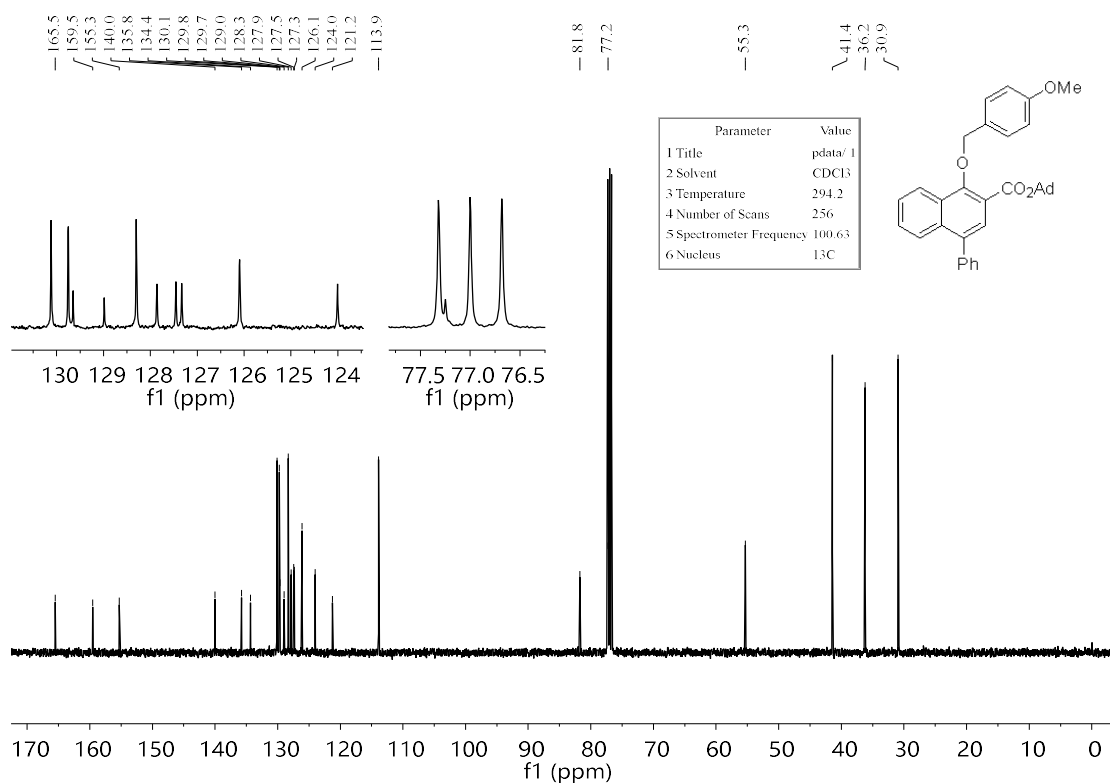

**Diethyl (1-((4-methoxybenzyl)oxy)-4-phenylnaphthalen-2-yl)phosphonate (A6)**

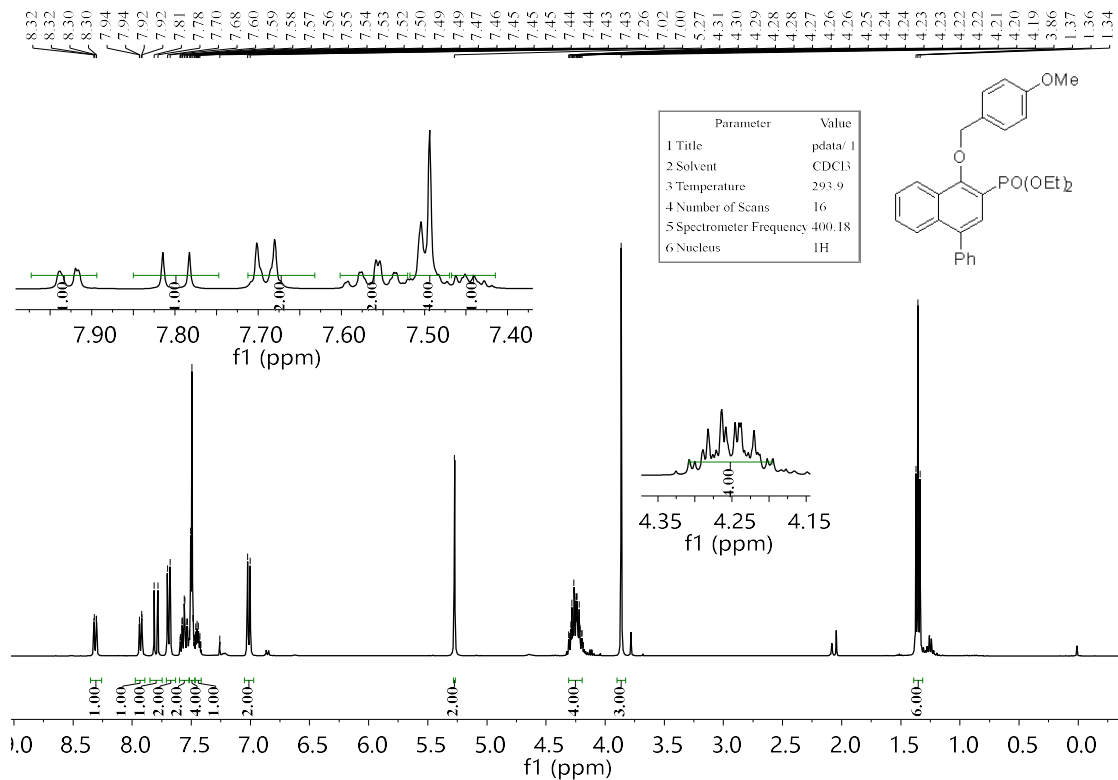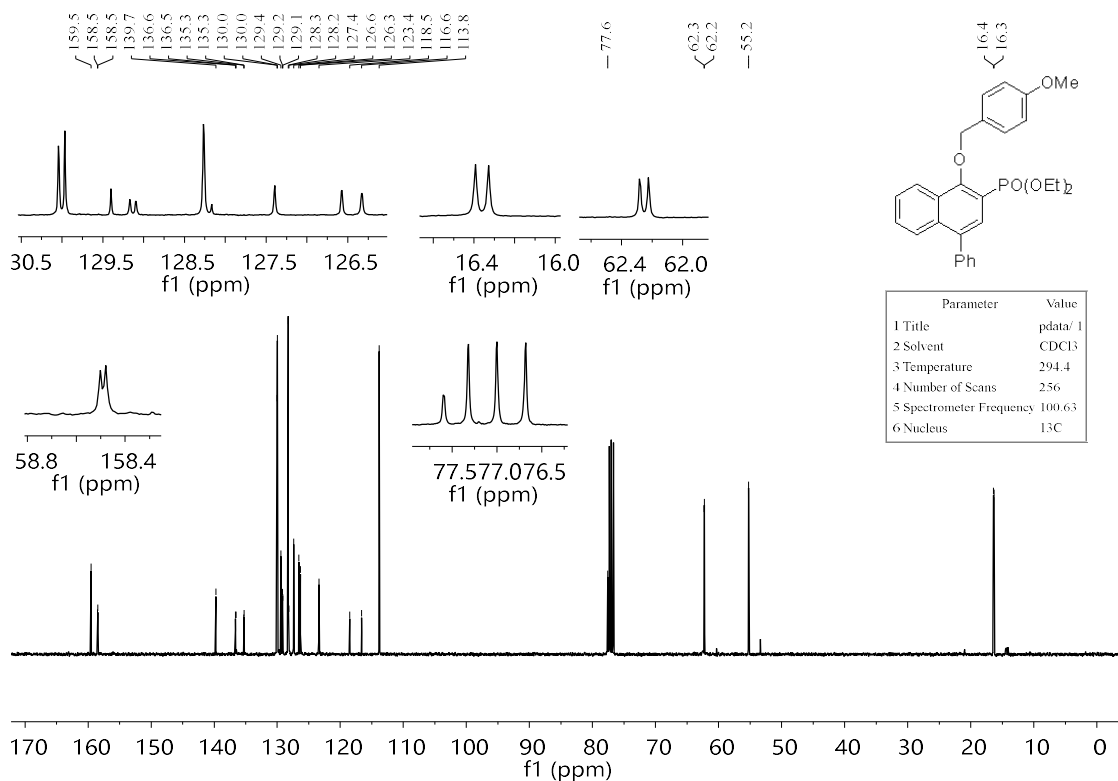

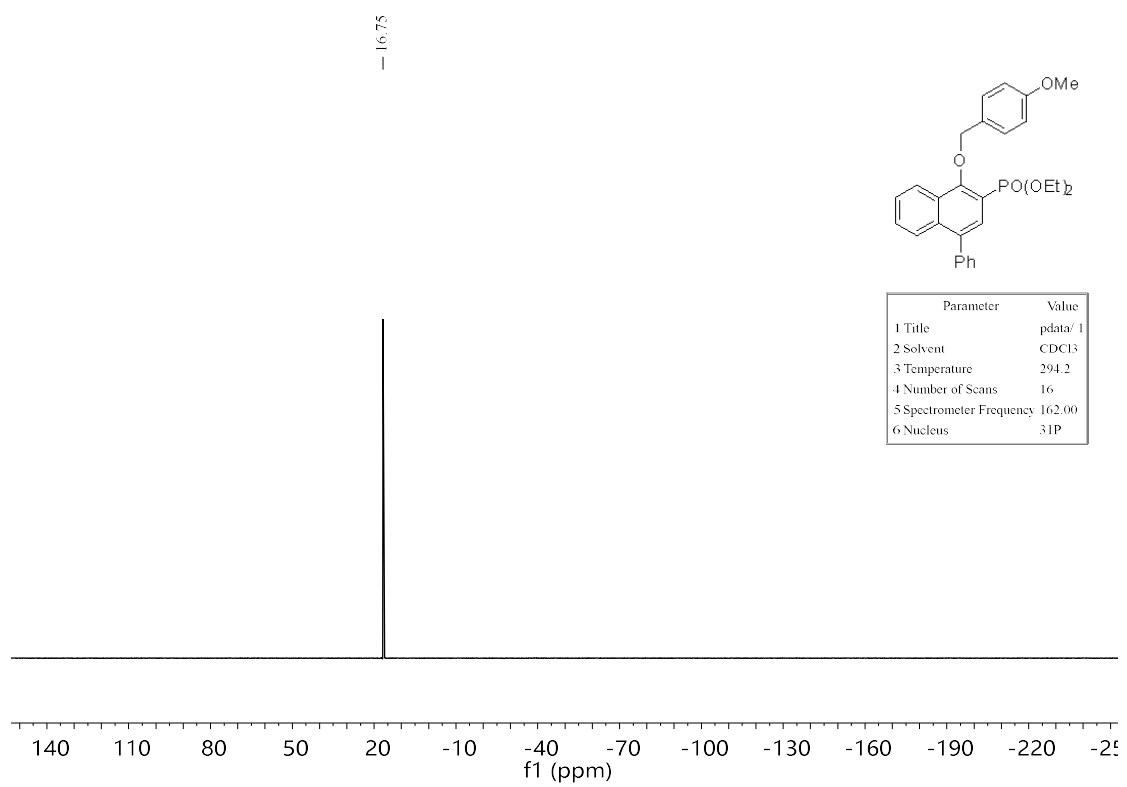

**1-(1-(4-methoxybenzyl)oxy)-4-phenylnaphthalen-2-yl)ethan-1-one (A7)**

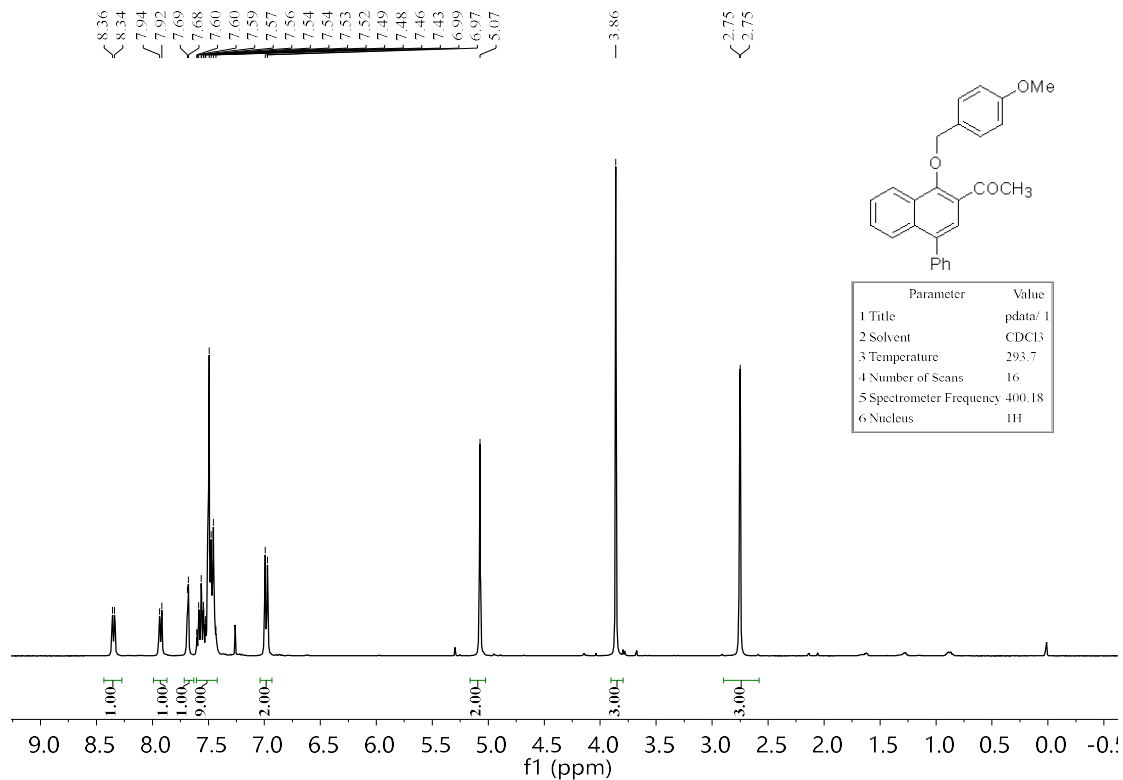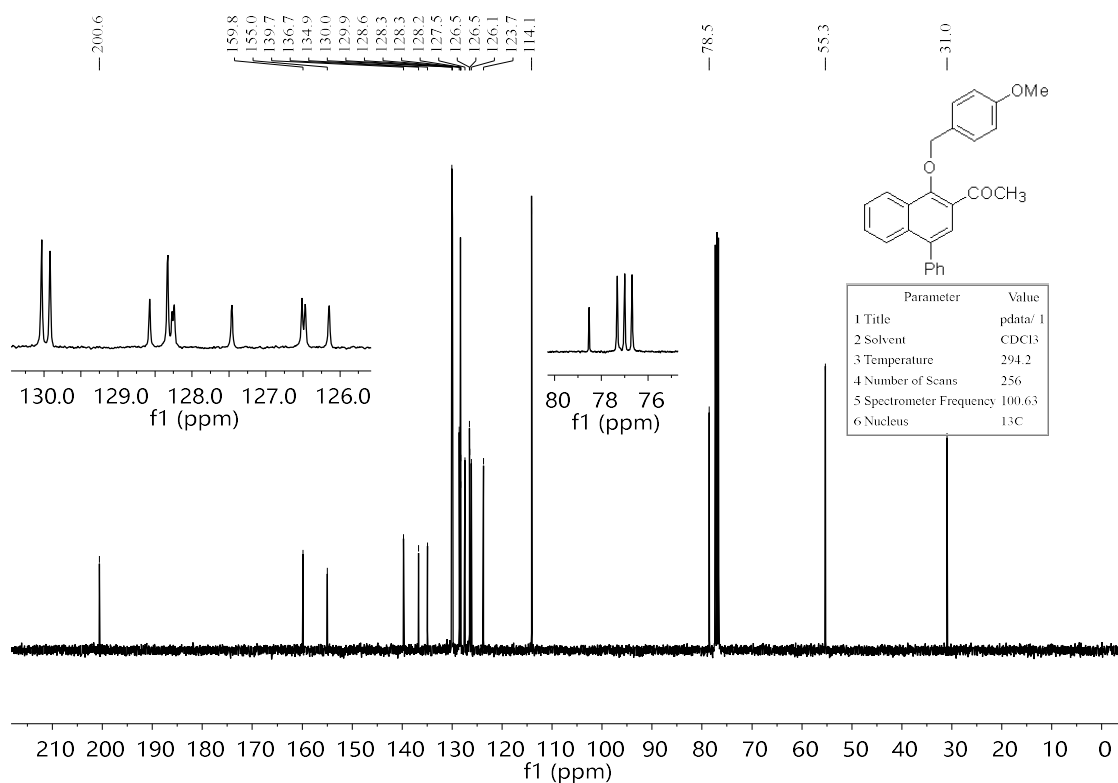

**Diethyl 1-((4-methoxybenzyl)oxy)-4-phenylnaphthalene-2,3-dicarboxylate (A8)**

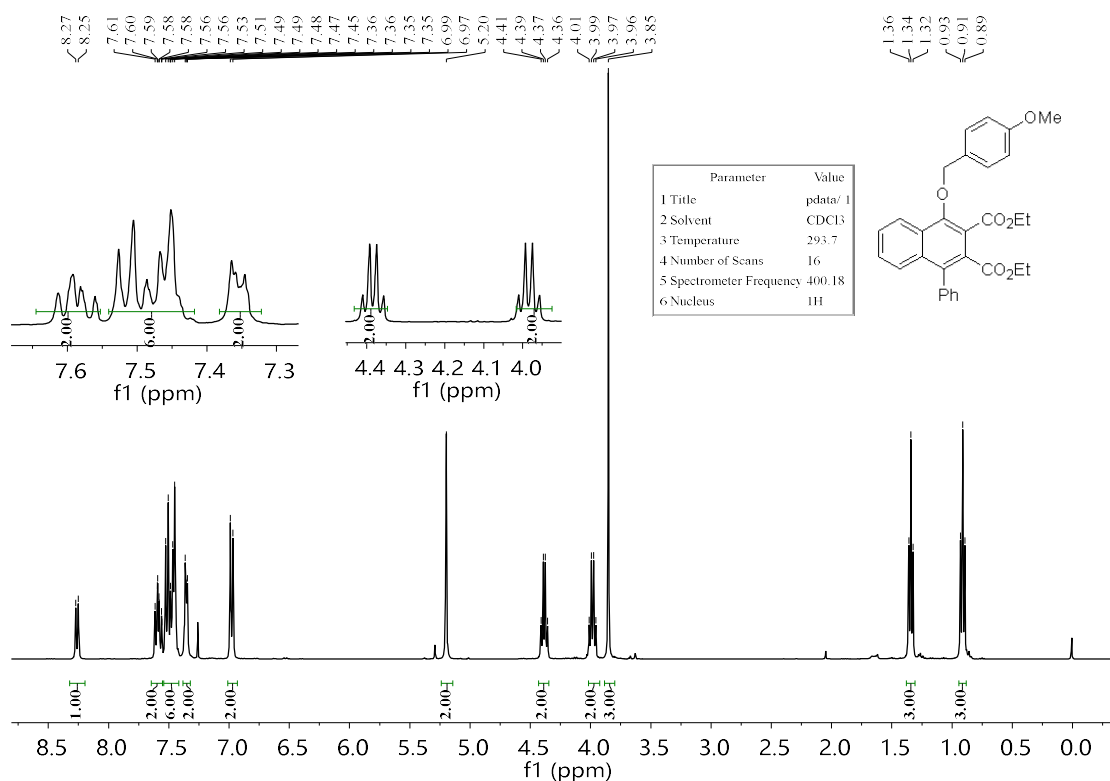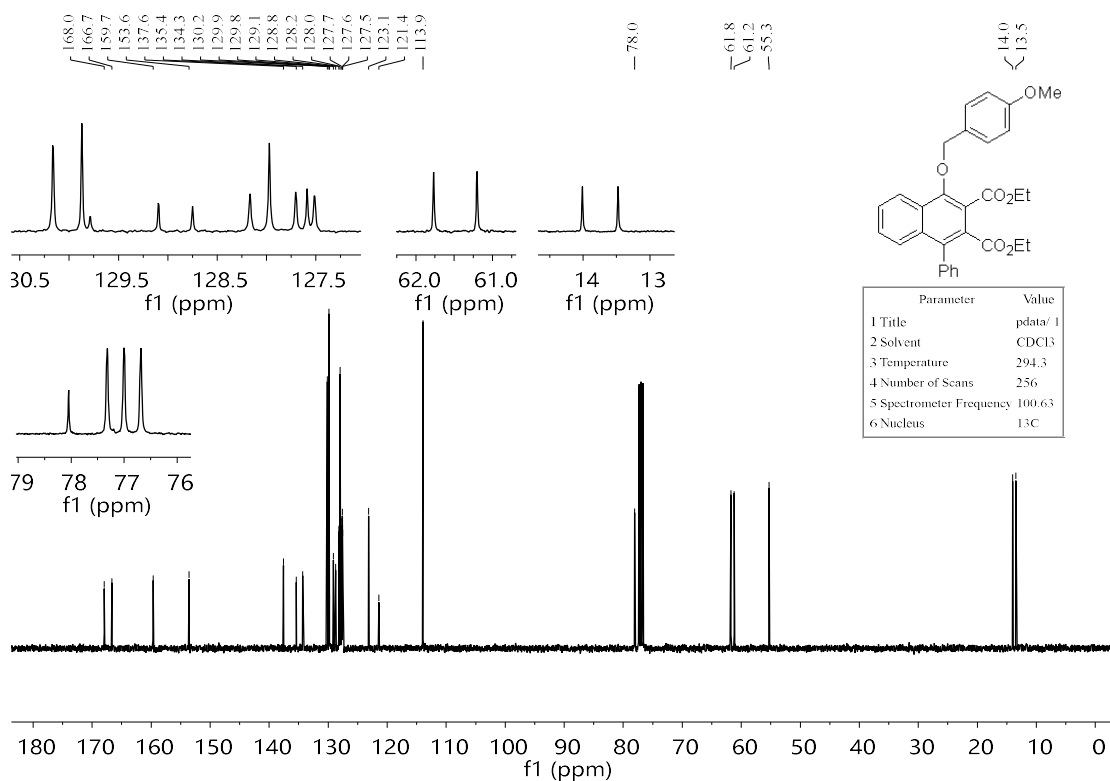



**Ethyl 1-((4-methoxybenzyl)oxy)-3,4-diphenyl-2-naphthoate (A9)**

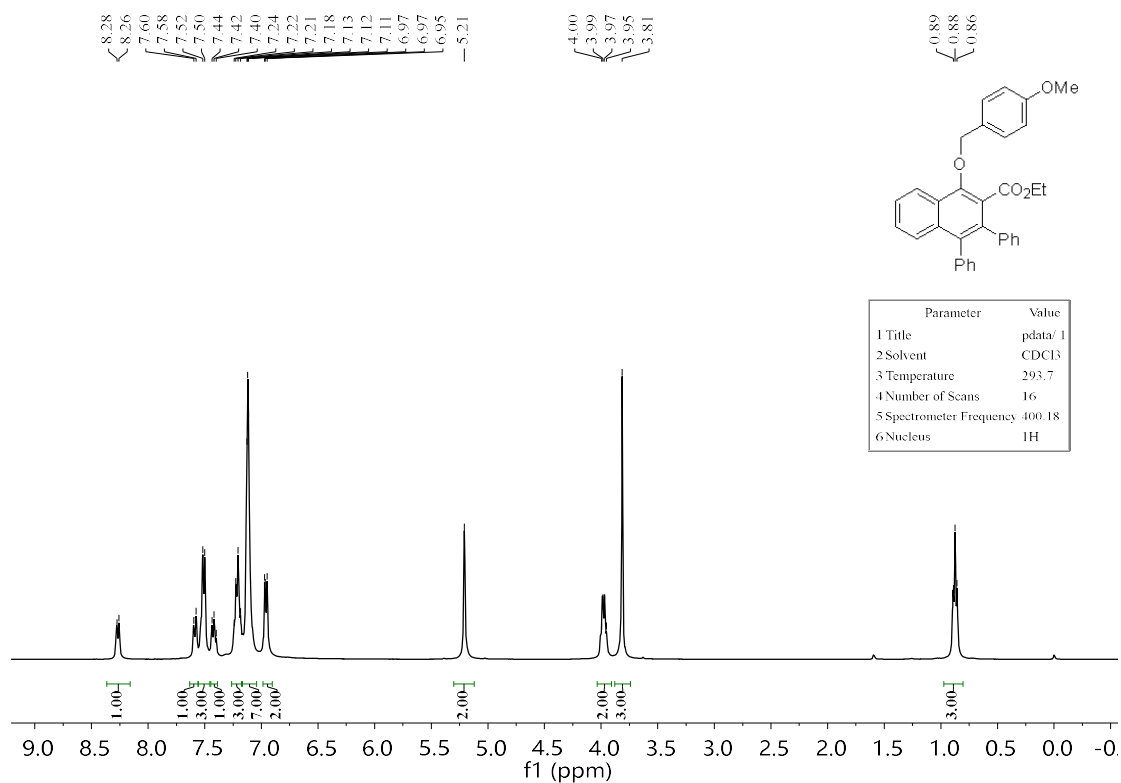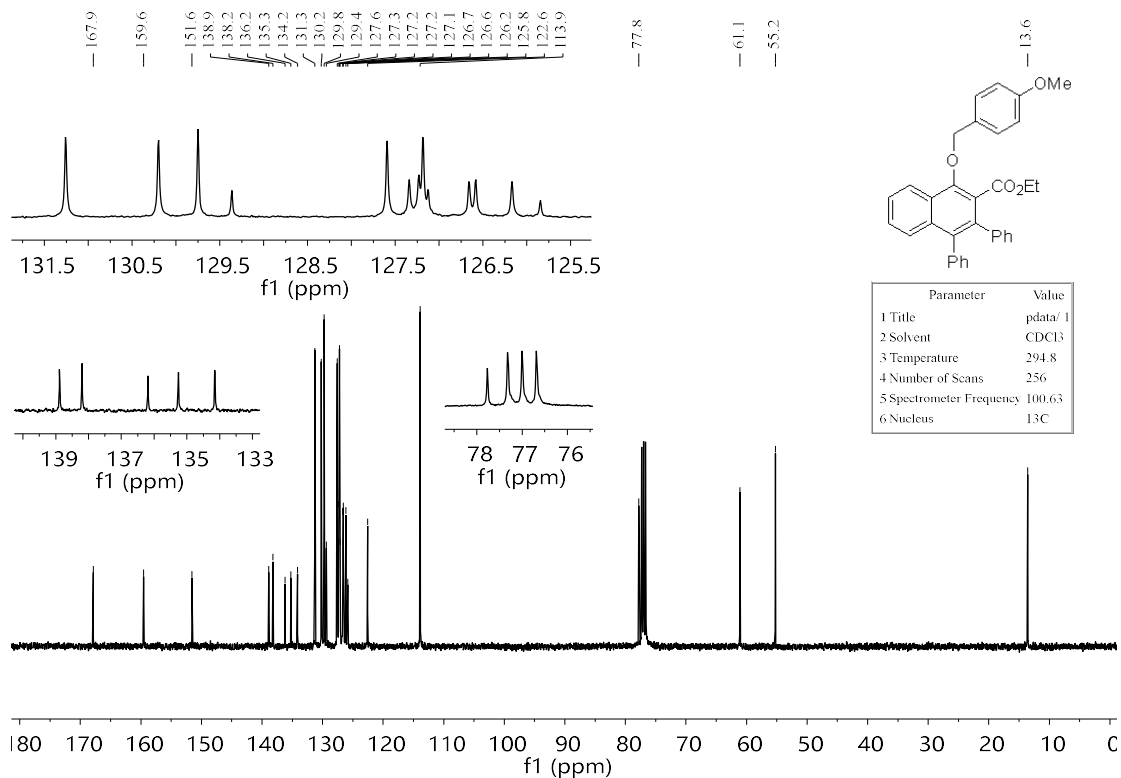

**Ethyl 1-((4-methoxybenzyl)oxy)-2-naphthoate (A10)**

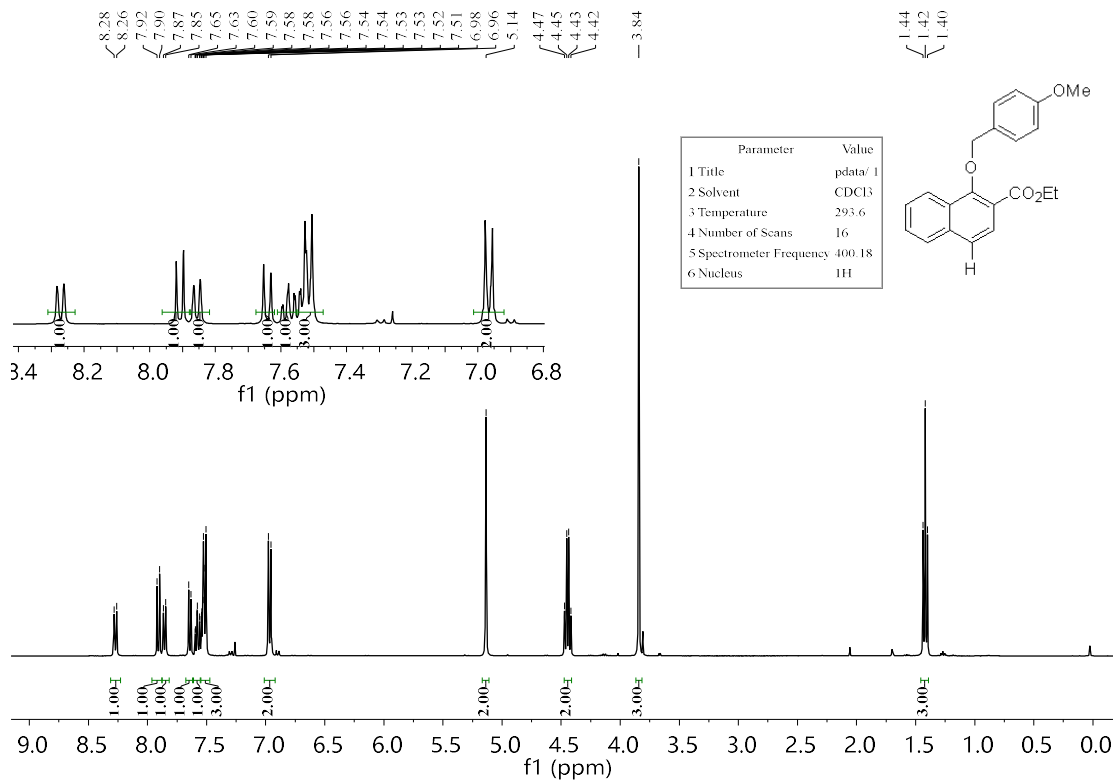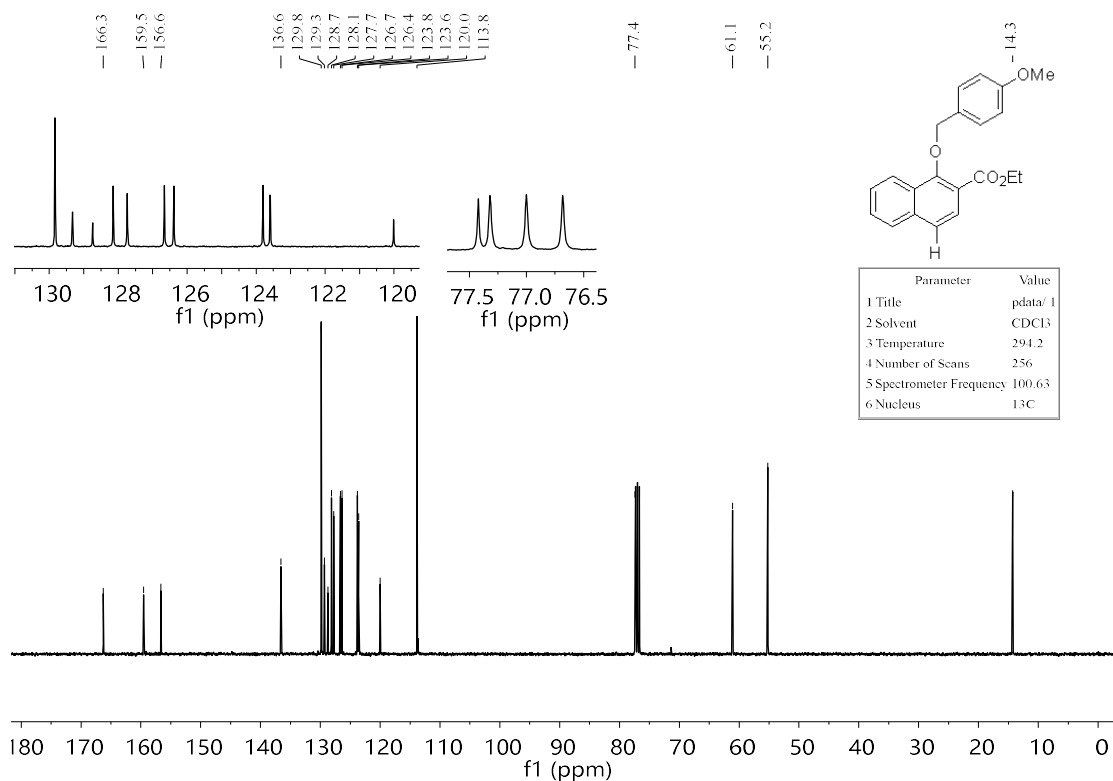

### Ethyl 4-chloro-1-((4-methoxybenzyl)oxy)-2-naphthoate (A11)

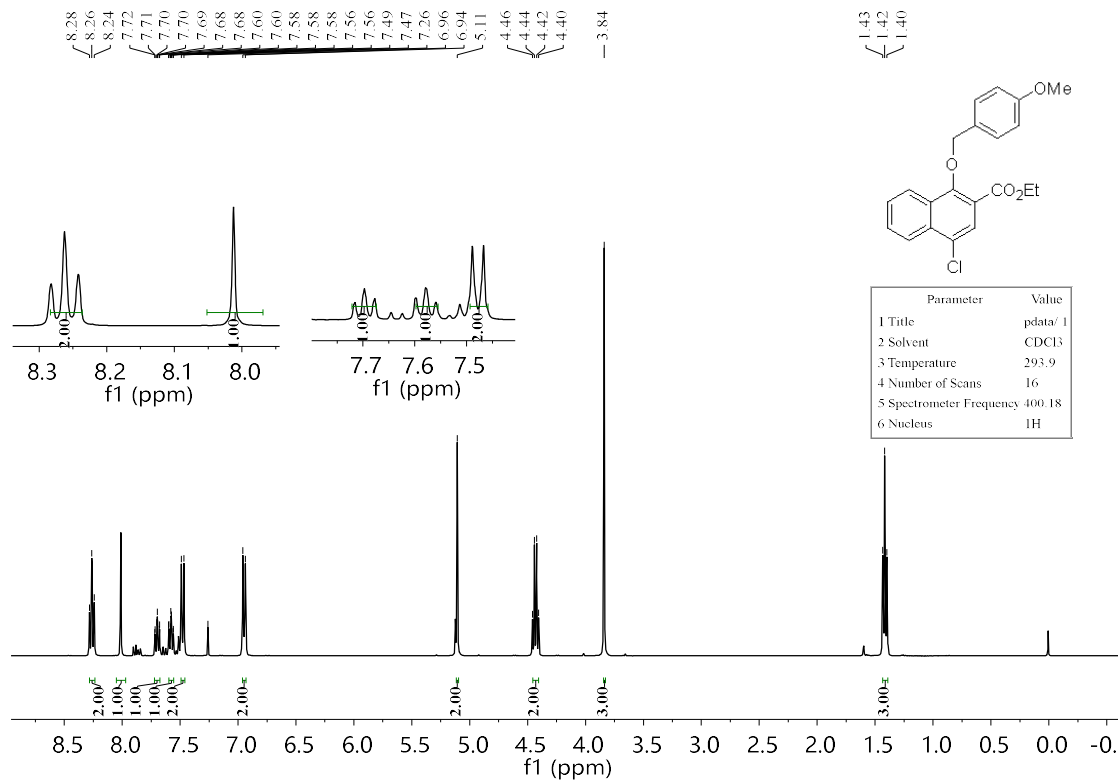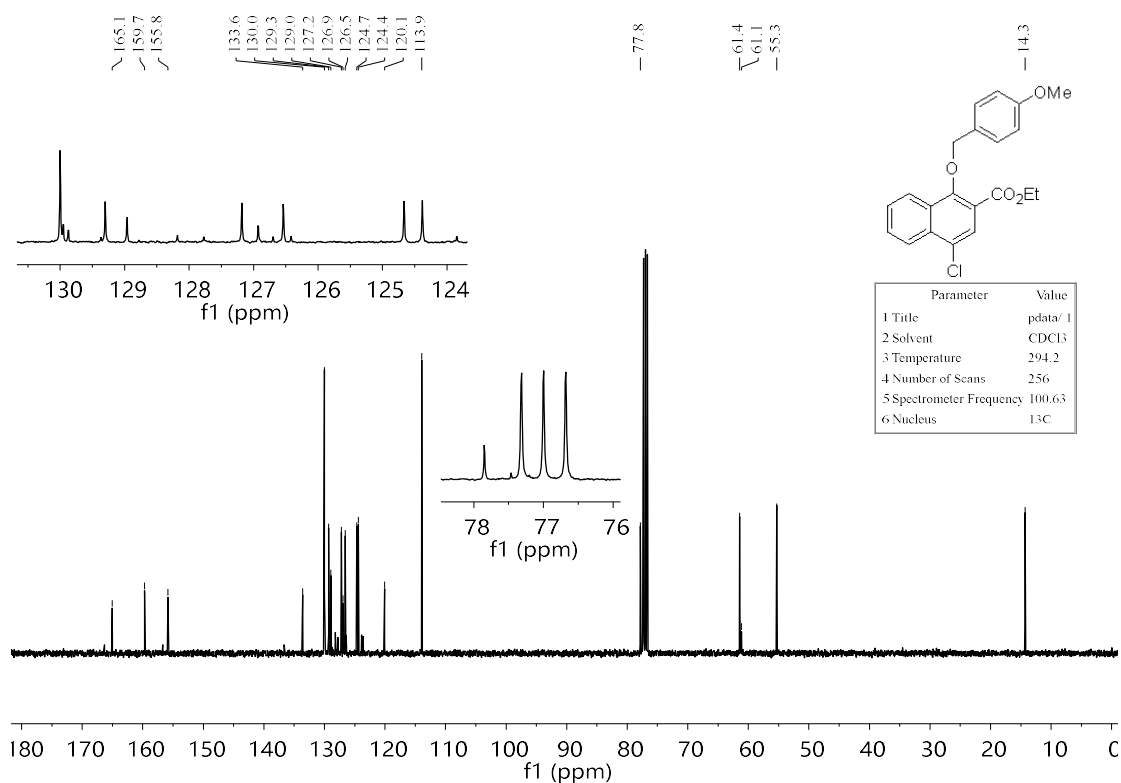

### Ethyl 4-bromo-1-((4-methoxybenzyl)oxy)-2-naphthoate (A12)

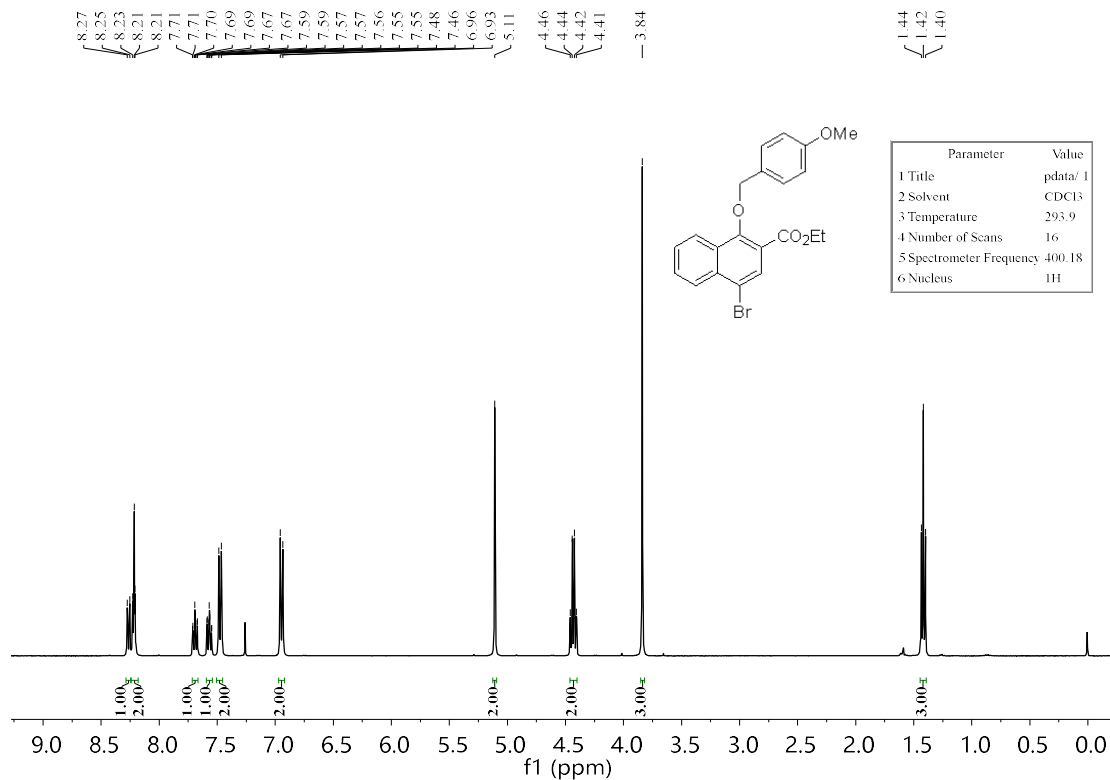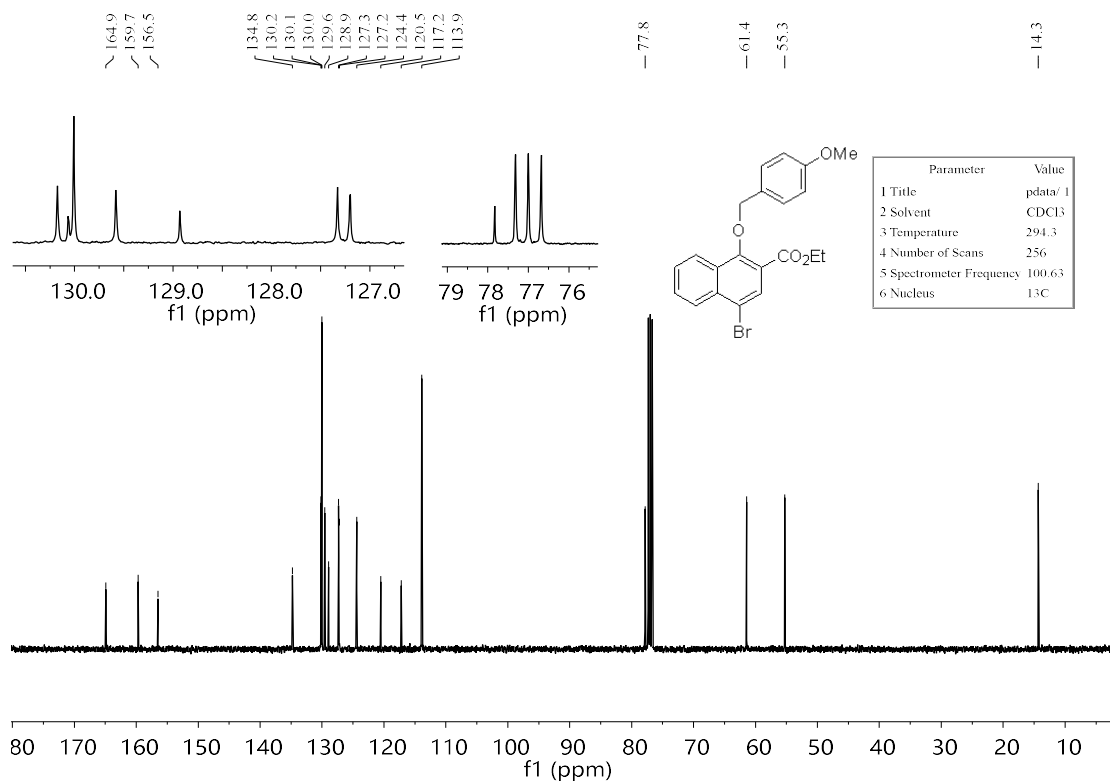

**Ethyl 1-((4-methoxybenzyl)oxy)-4-(4-methoxyphenyl)-2-naphthoate (A13)**

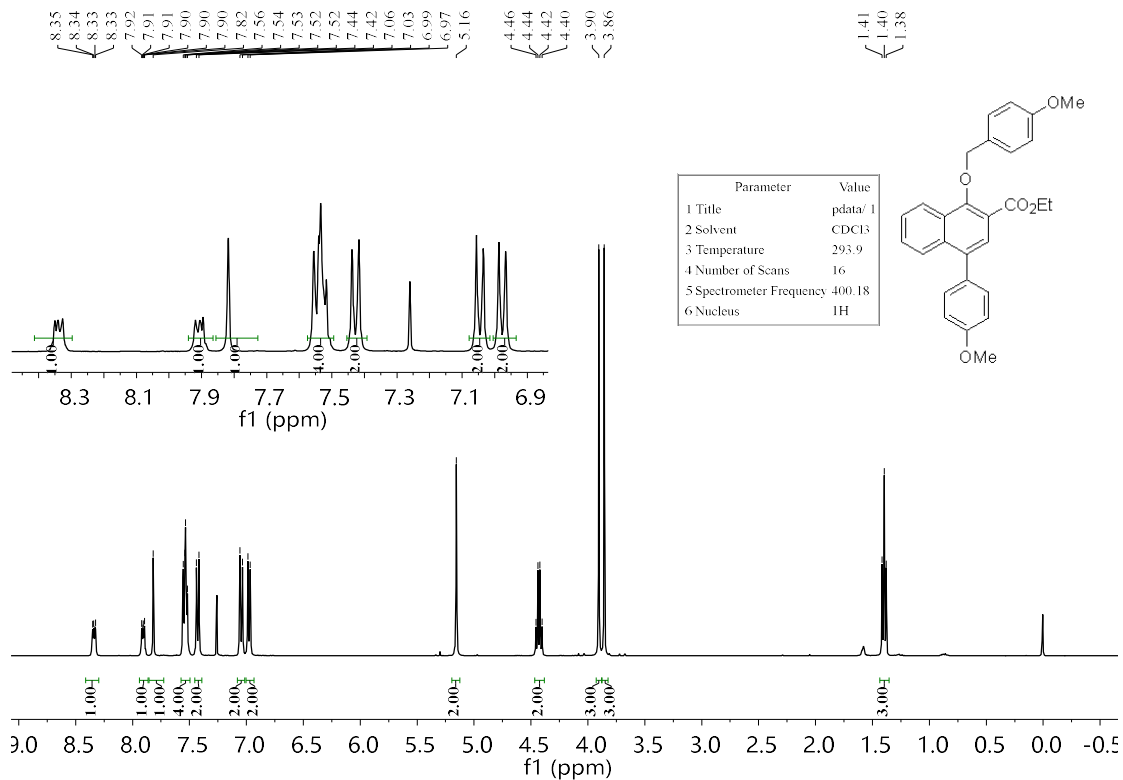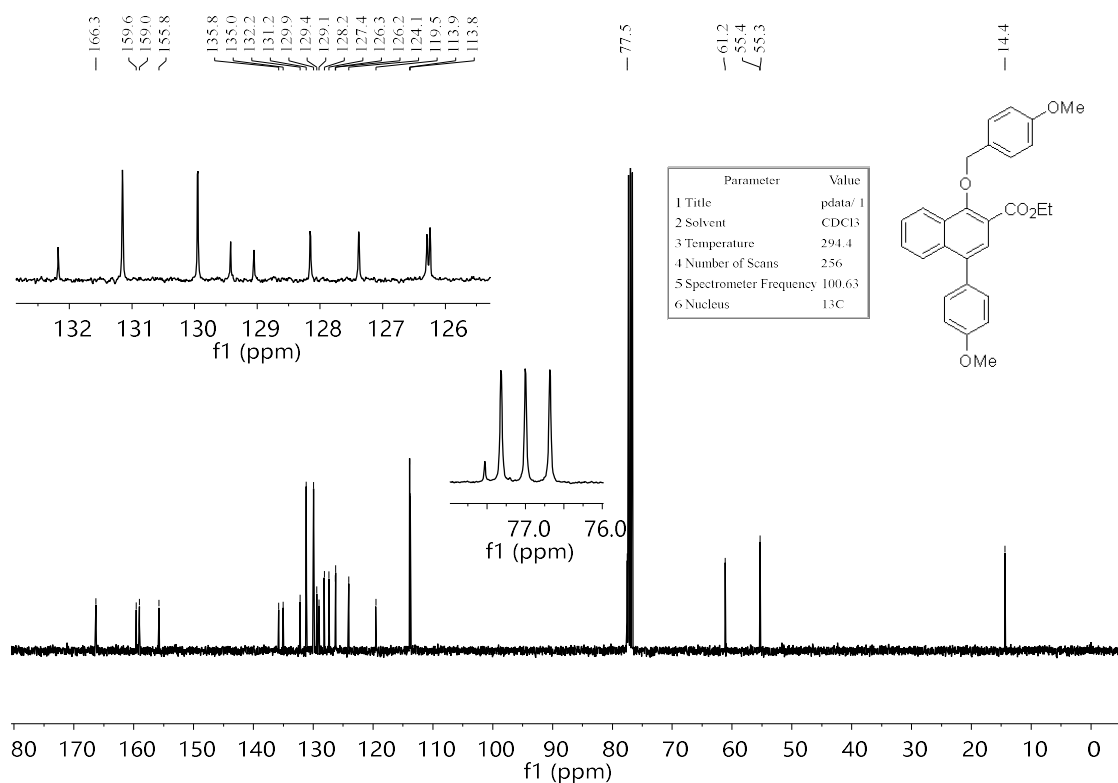

**Ethyl 4-(4-bromophenyl)-1-((4-methoxybenzyl)oxy)-2-naphthoate (A14)**

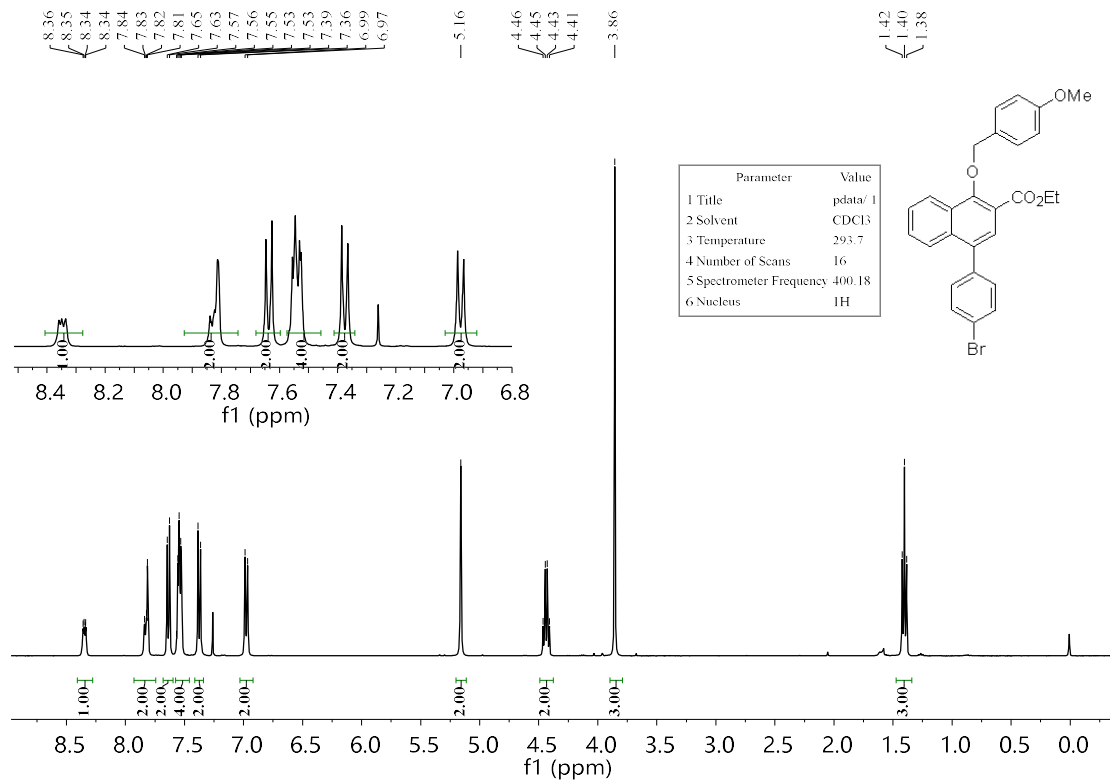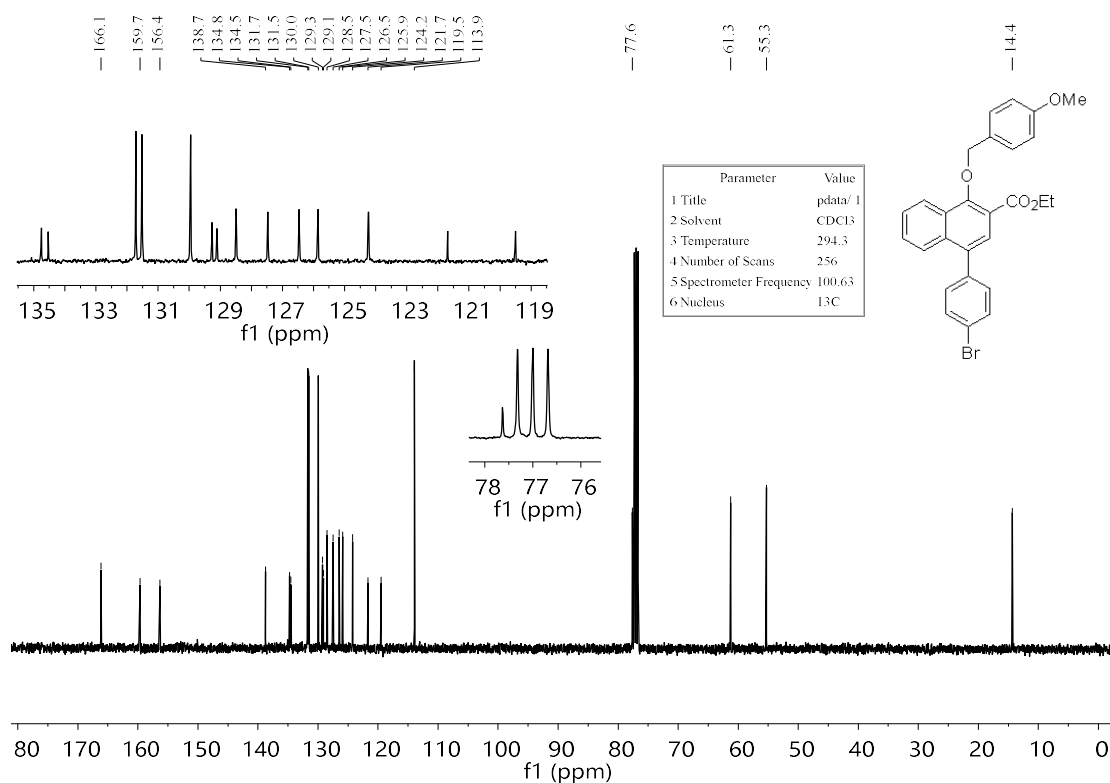

# Ethyl 1-((4-methoxybenzyl)oxy)-4-(thiophen-2-yl)-2-naphthoate (A15)

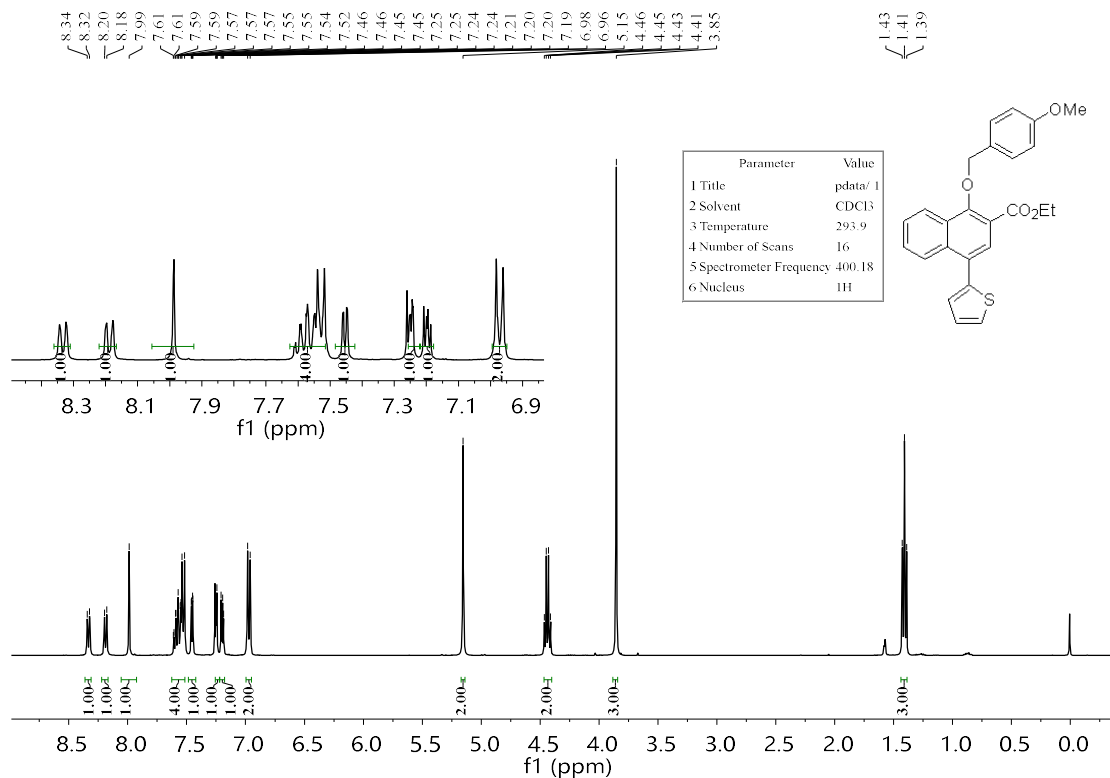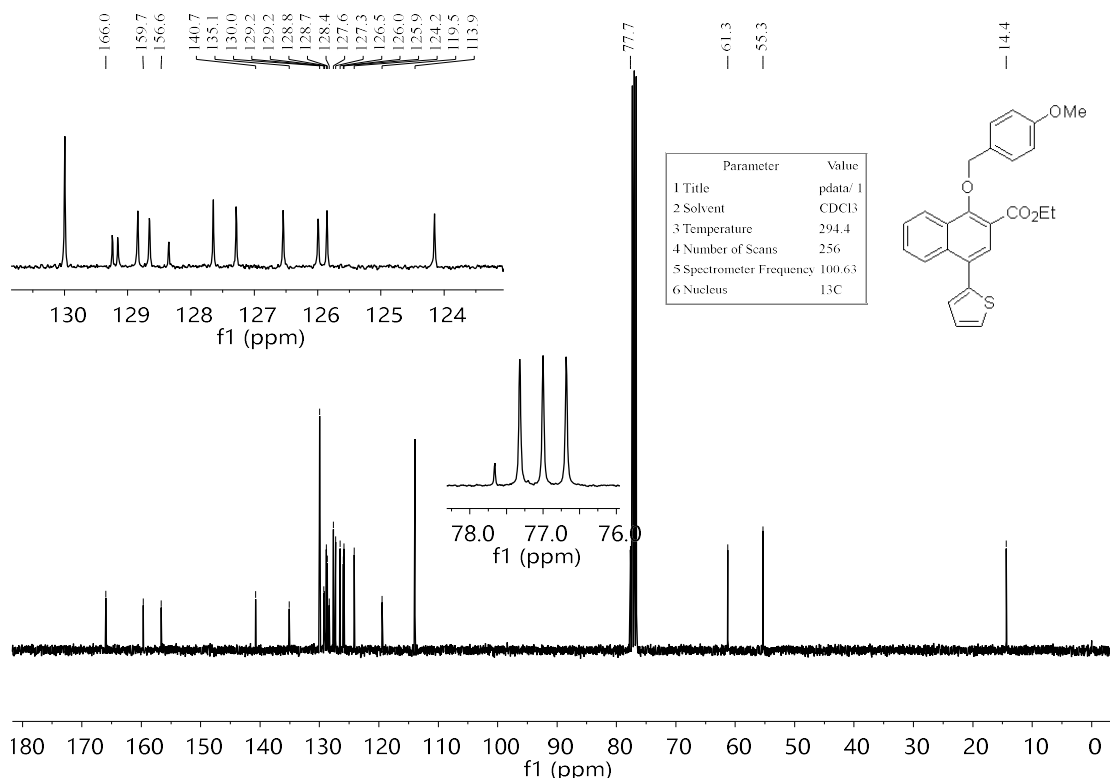

**Ethyl 4-cyclopropyl-1-((4-methoxybenzyl)oxy)-2-naphthoate (A16)**

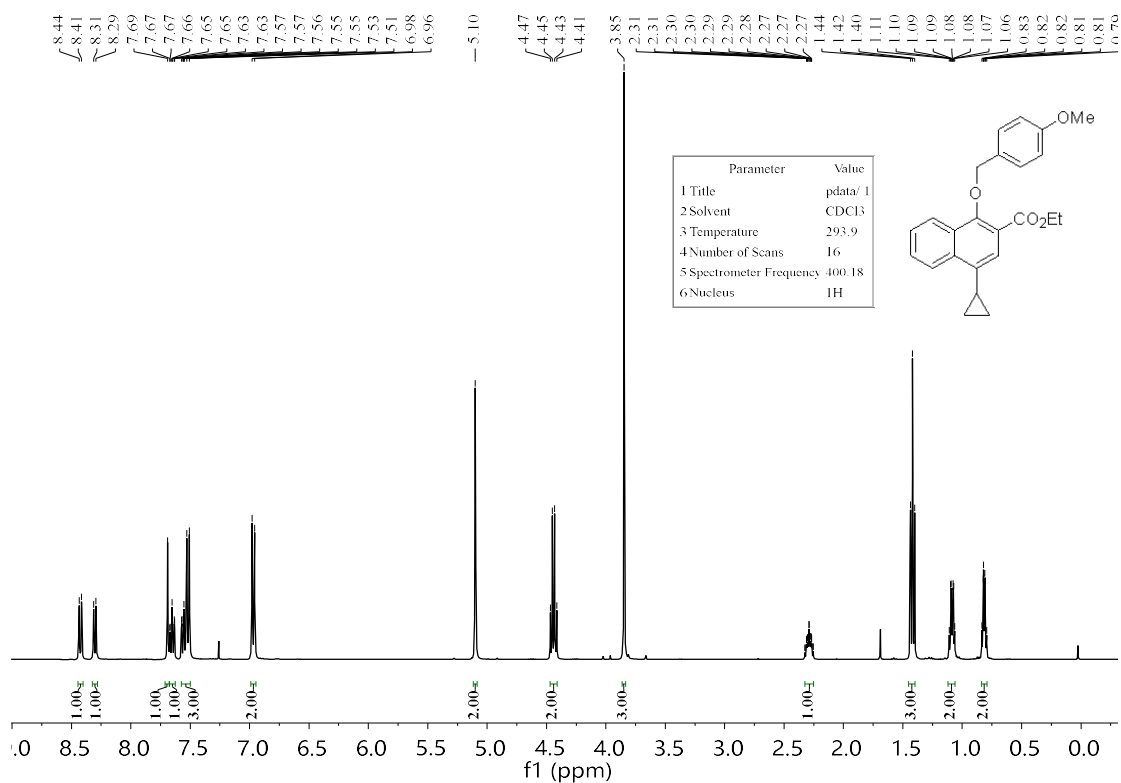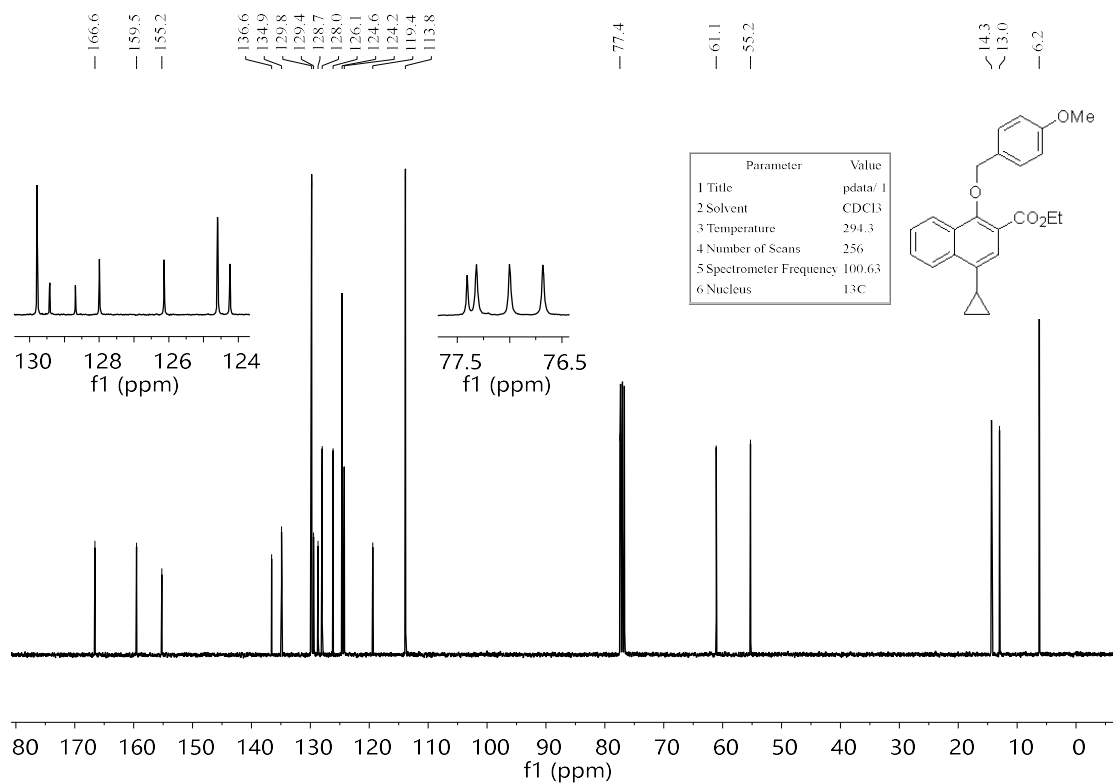



**Ethyl 1-((4-methoxybenzyl)oxy)-4-(3-phenylprop-2-yn-1-yl)-2-naphthoate (A17)**

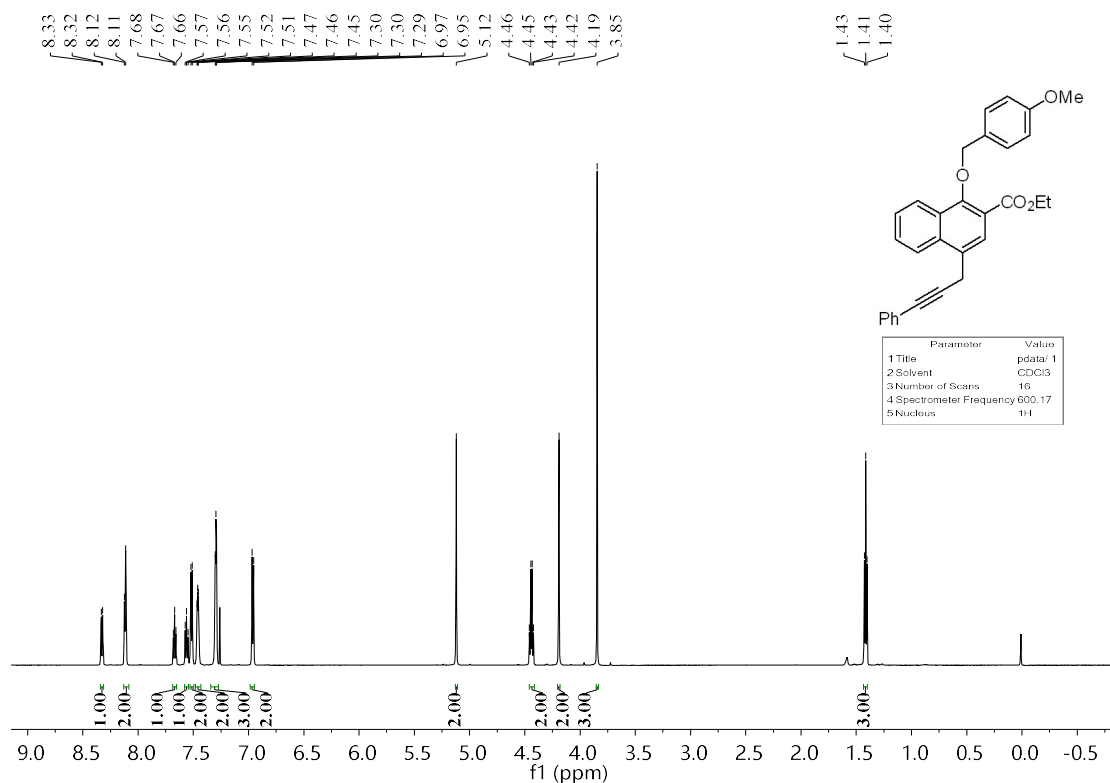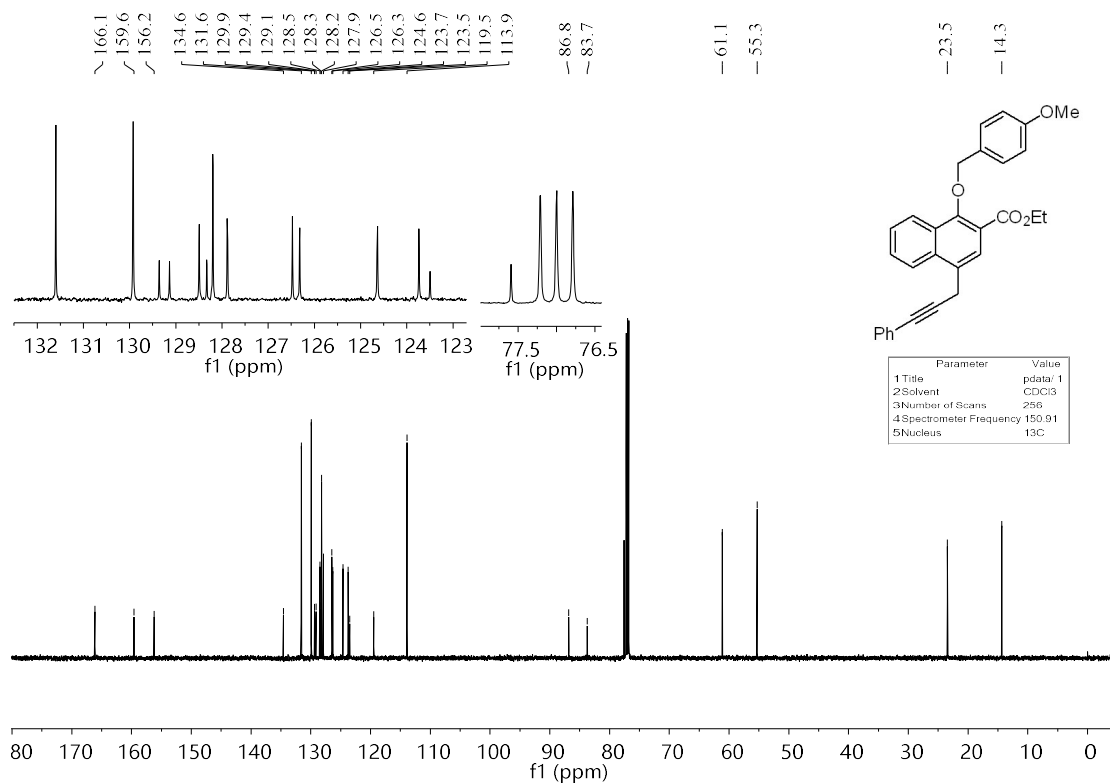

**Ethyl 1-((4-methoxybenzyl)oxy)-6-methyl-4-phenyl-2-naphthoate (A18)**

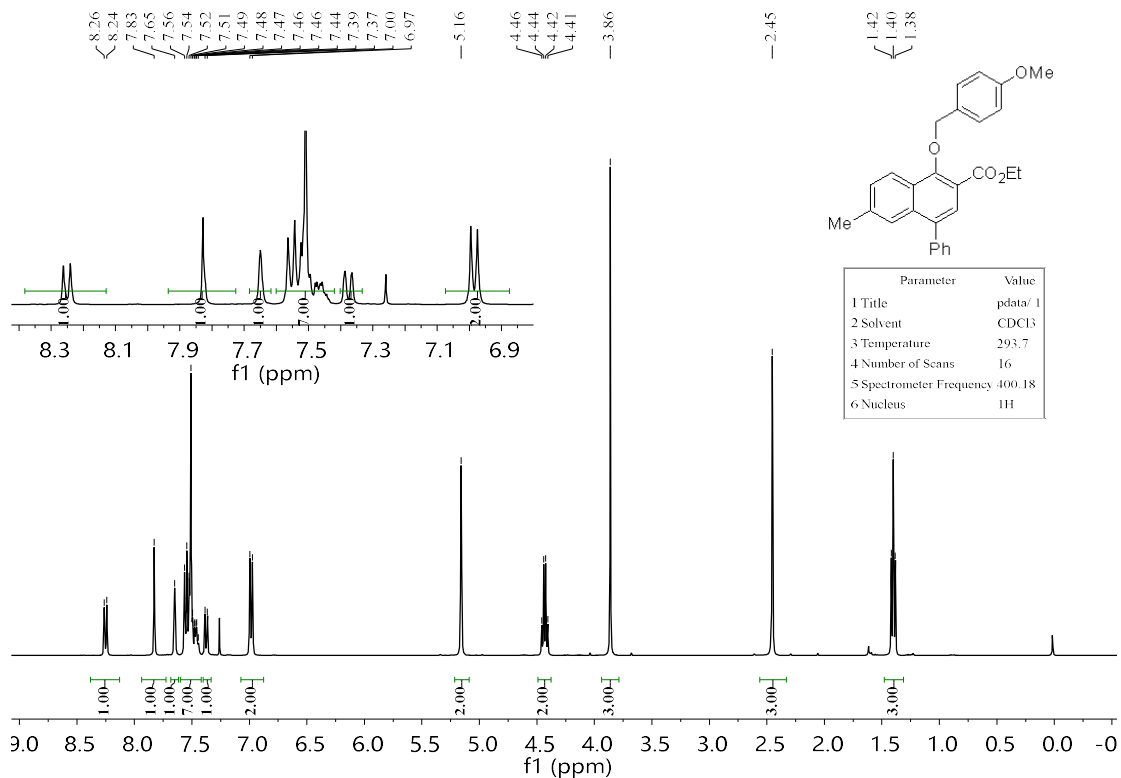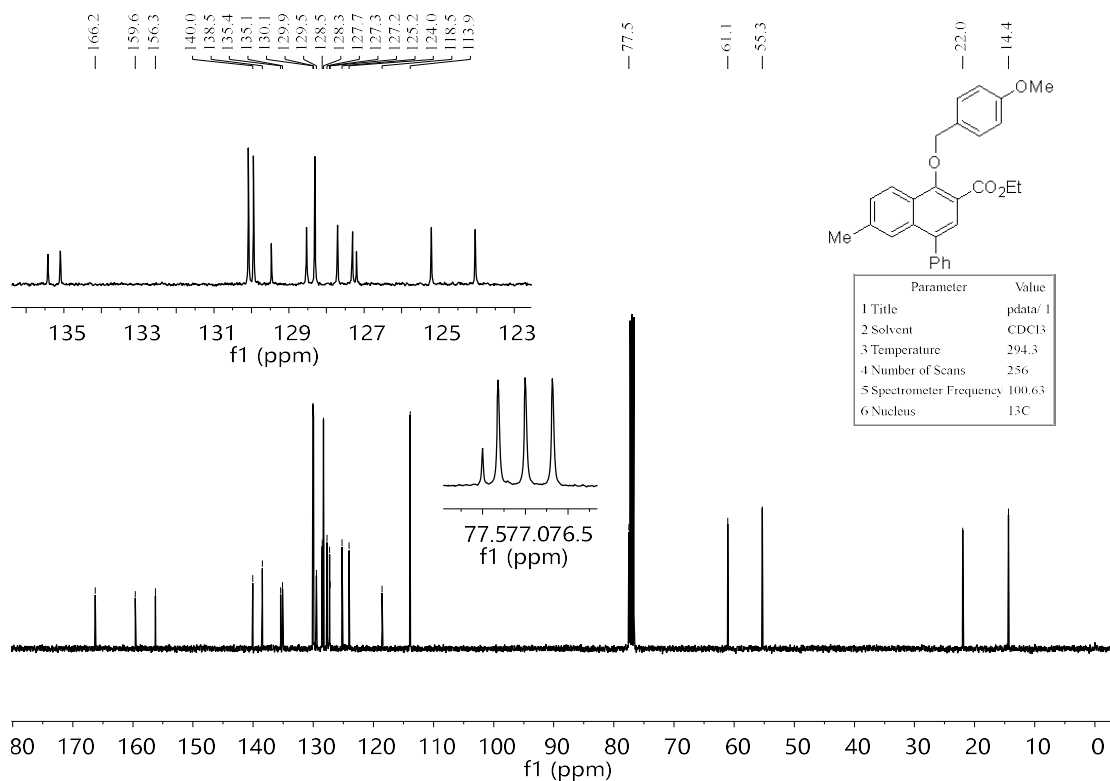

# Ethyl 1-((4-methoxybenzyl)oxy)-4,6-diphenyl-2-naphthoate (A19)

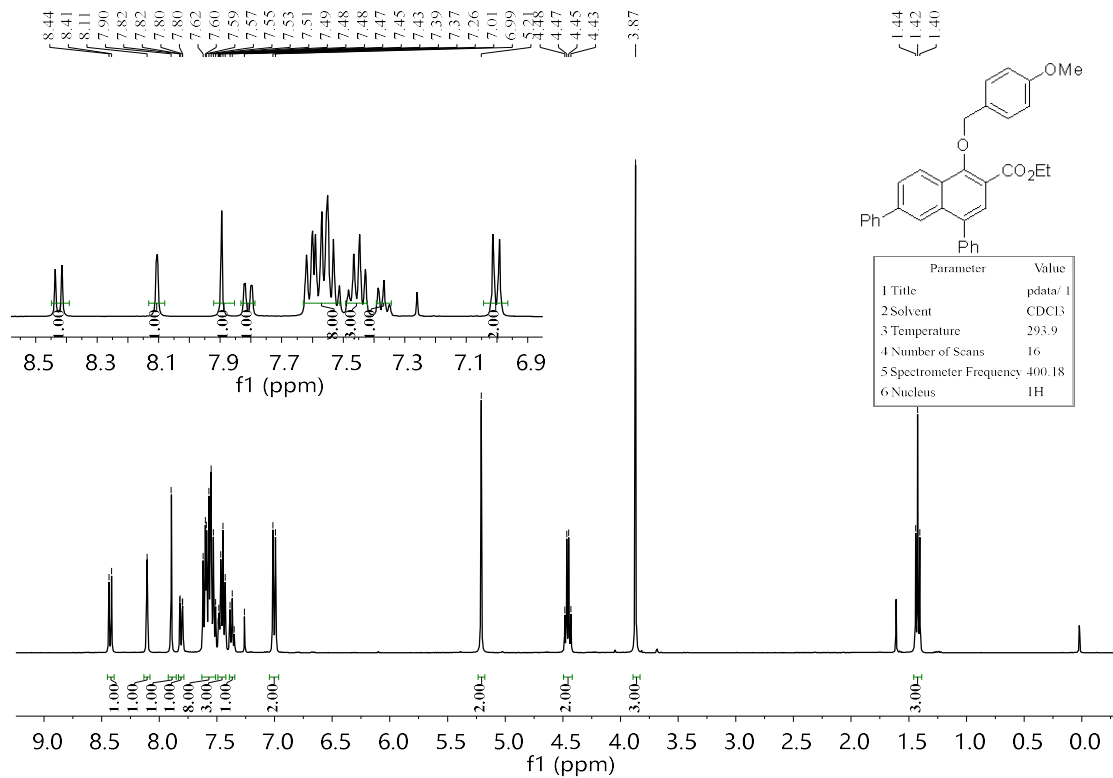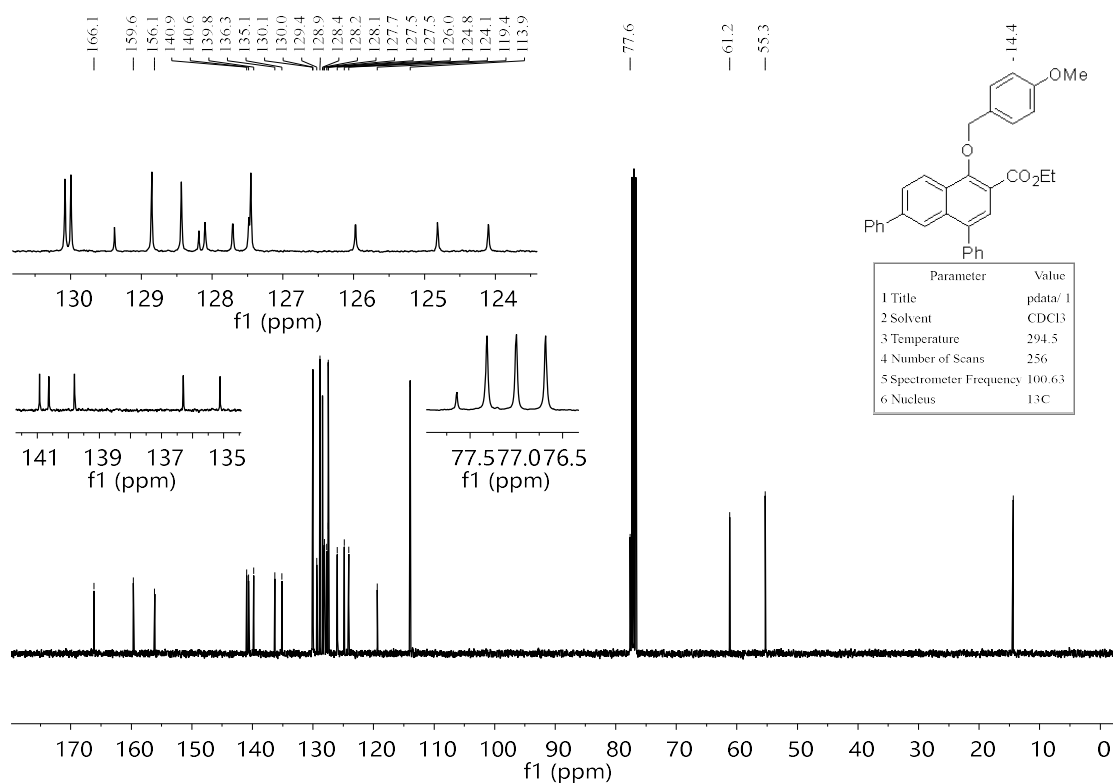

**Ethyl 6-methoxy-1-((4-methoxybenzyl)oxy)-4-phenyl-2-naphthoate (A20)**

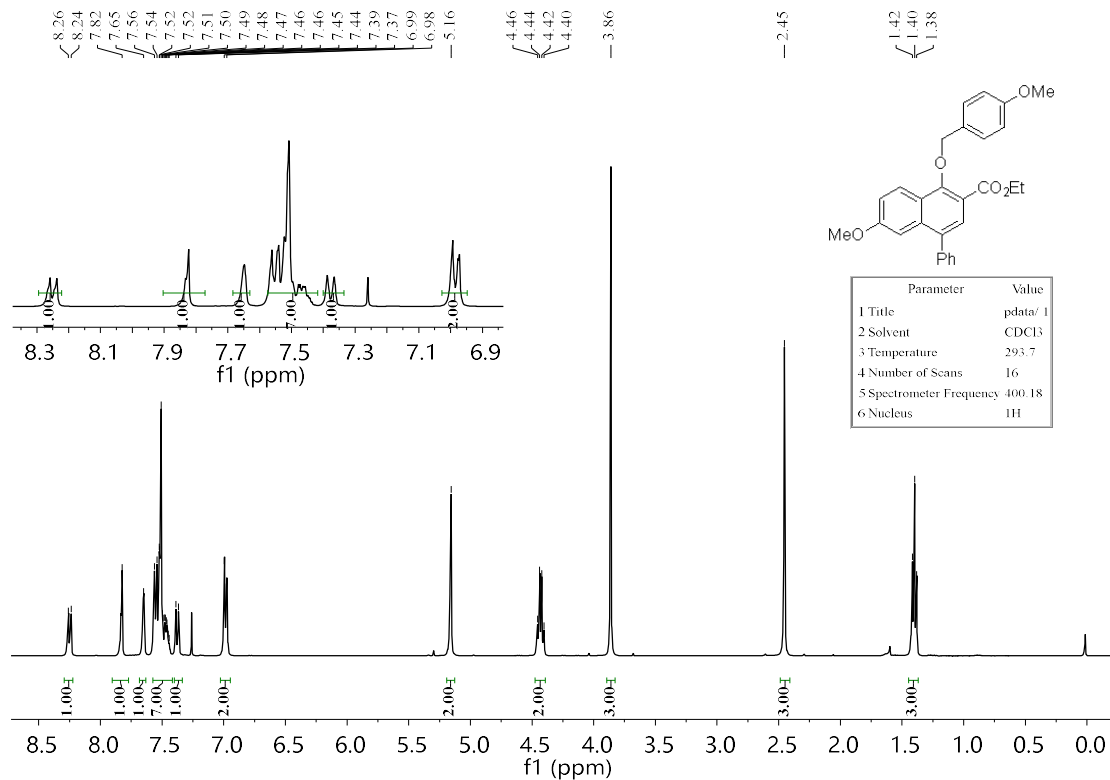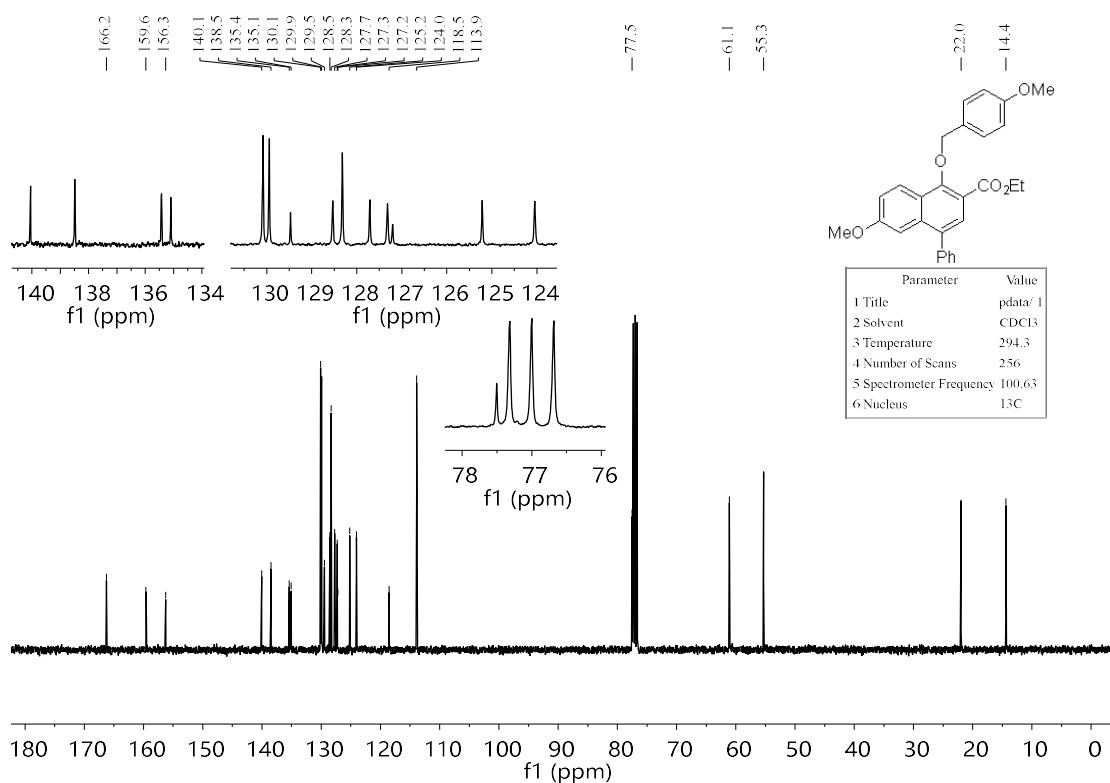

**Ethyl 6-fluoro-1-((4-methoxybenzyl)oxy)-4-phenyl-2-naphthoate (A21)**

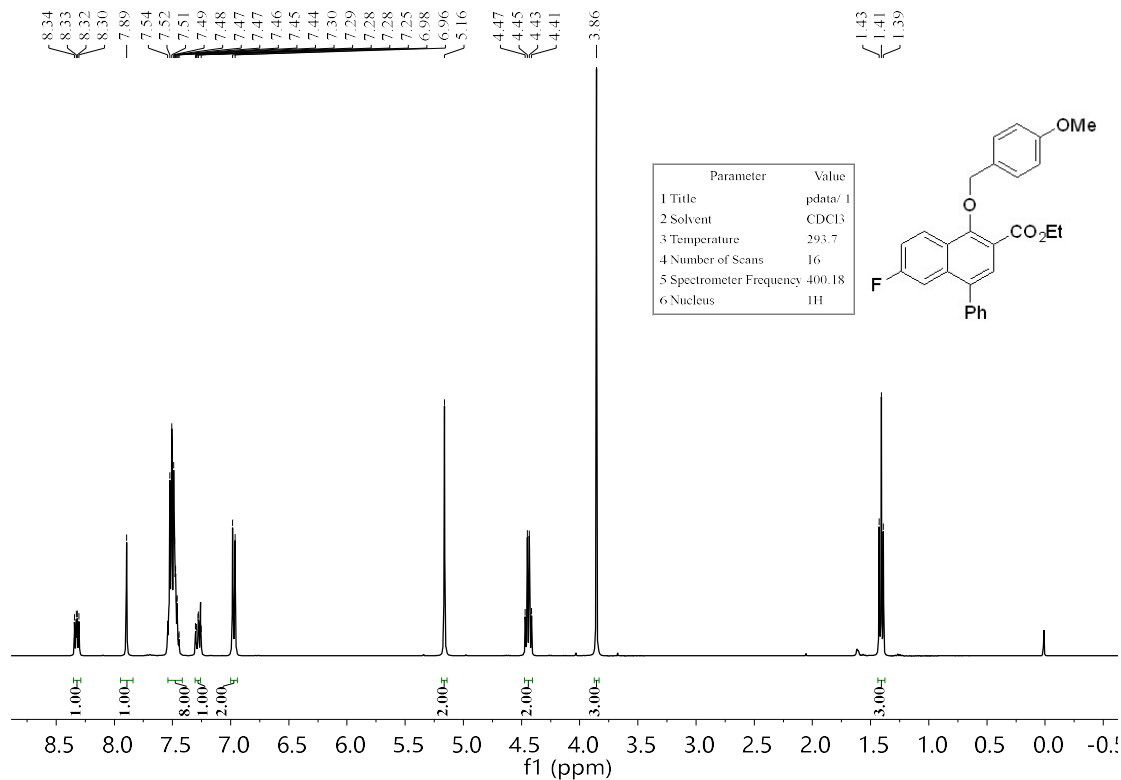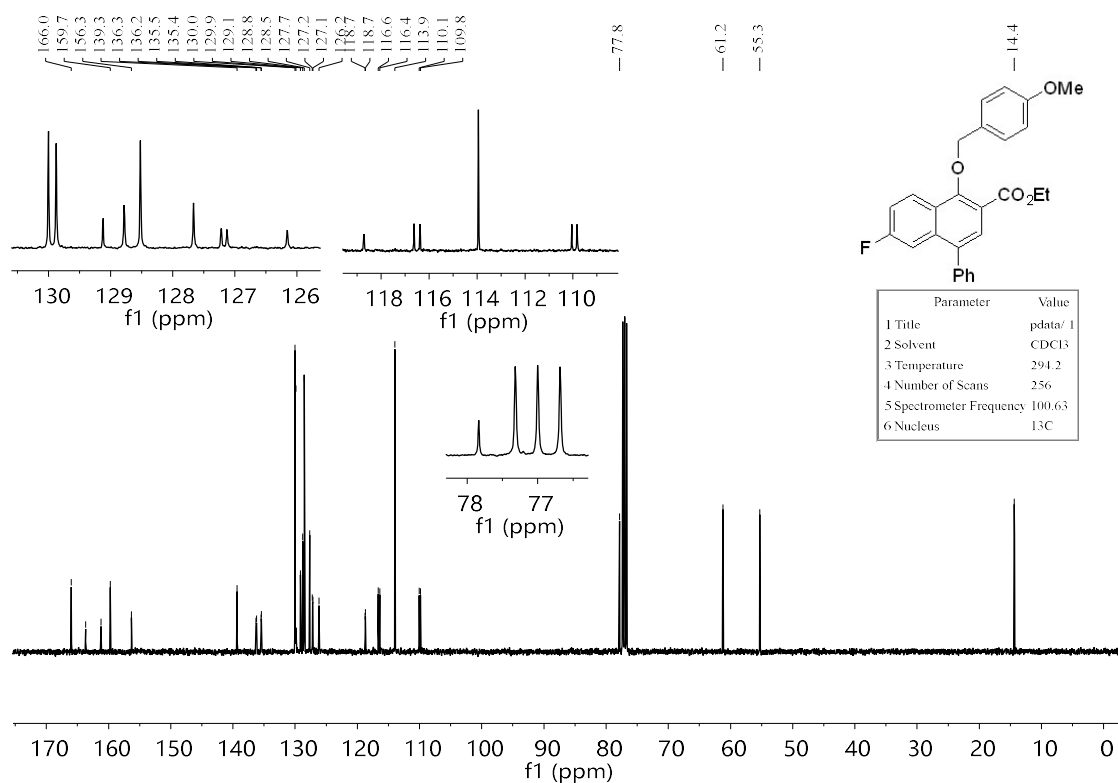

**Ethyl 6-chloro-1-((4-methoxybenzyl)oxy)-4-phenyl-2-naphthoate (A22)**

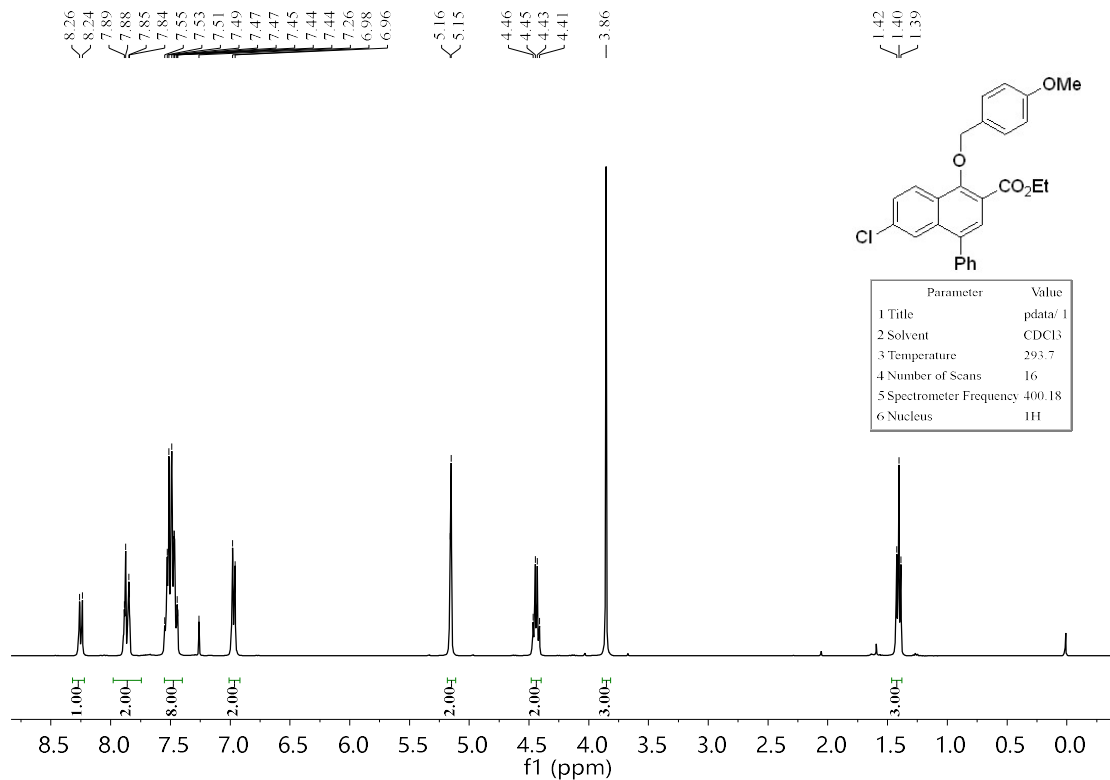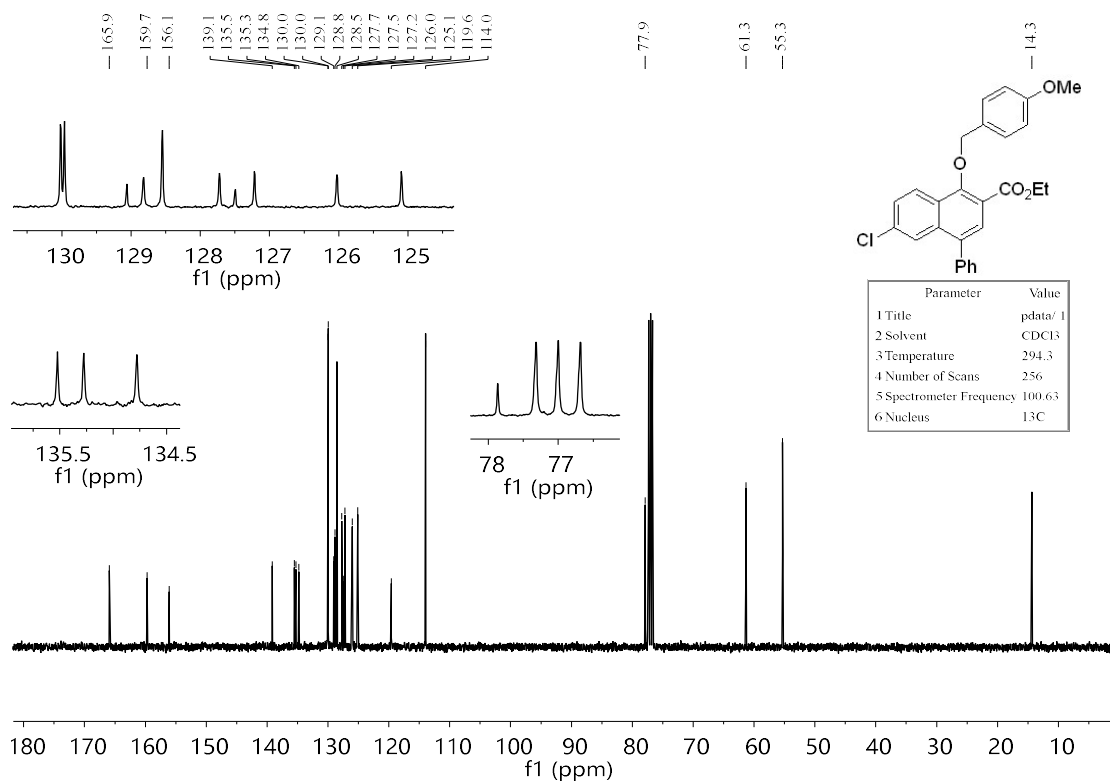

**Ethyl 6-bromo-1-((4-methoxybenzyl)oxy)-4-phenyl-2-naphthoate (A23)**

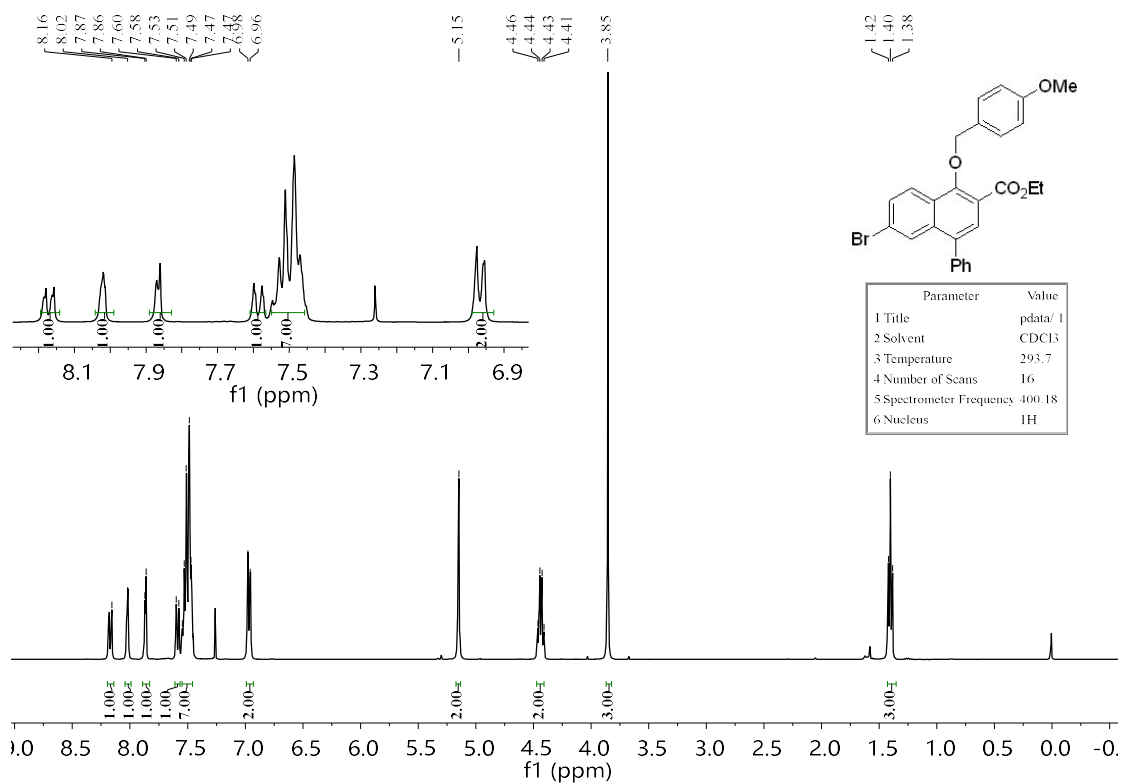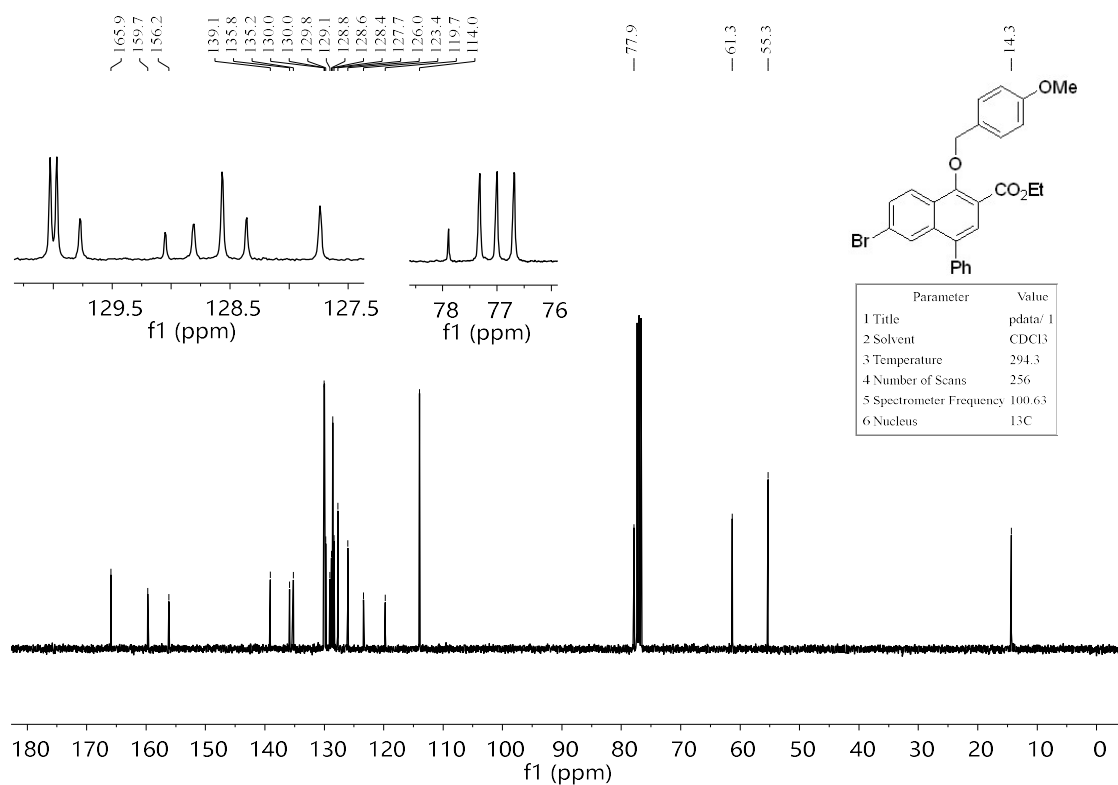

**Ethyl 1-((4-methoxybenzyl)oxy)-4-phenyl-6-(trifluoromethoxy)-2-naphthoate (A24)**

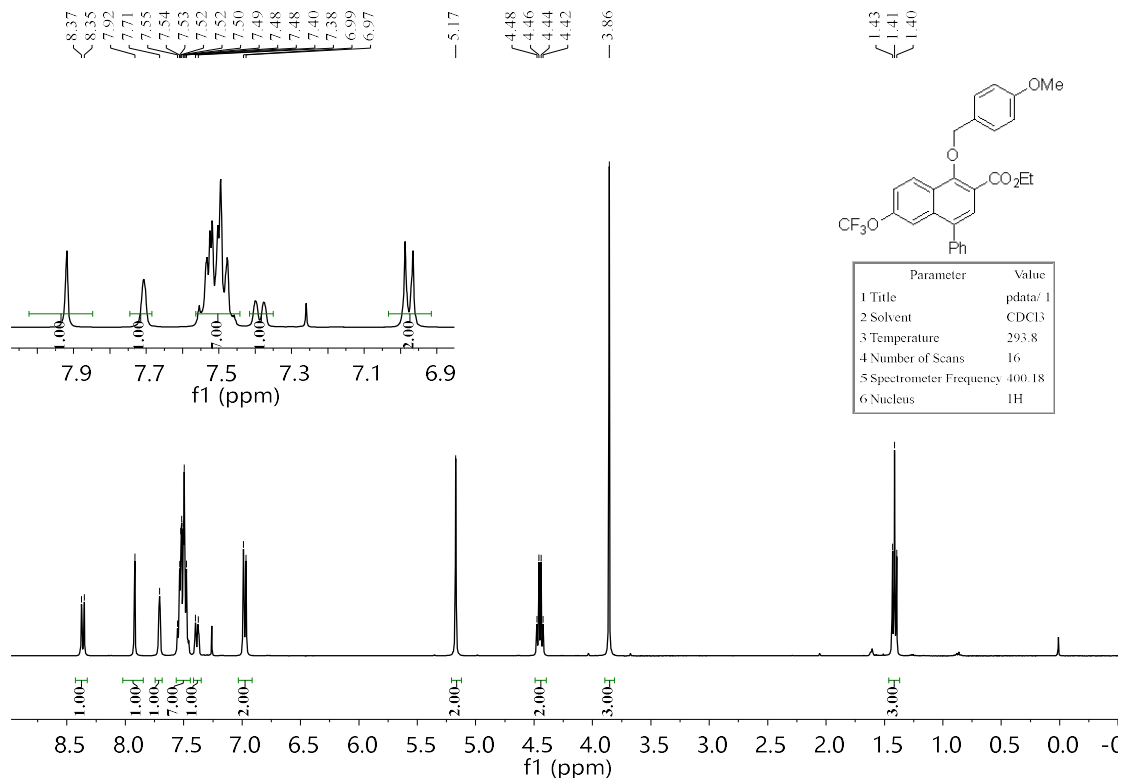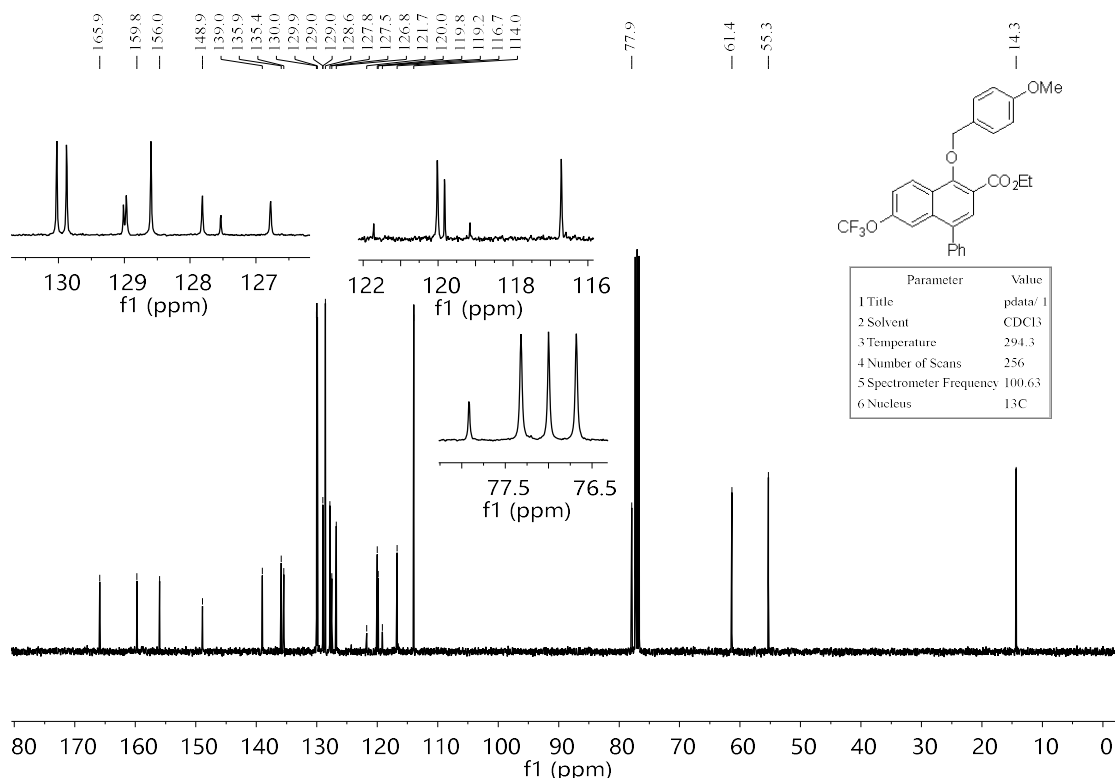



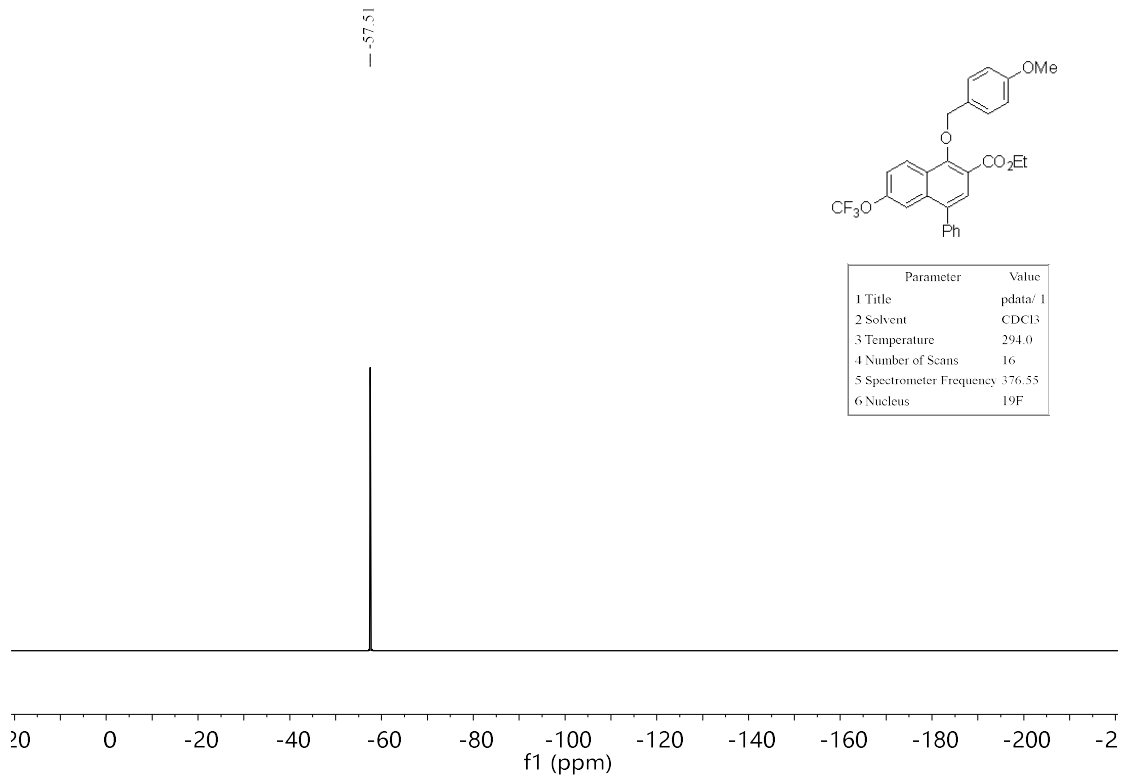

**Ethyl 8-fluoro-1-((4-methoxybenzyl)oxy)-4-phenyl-2-naphthoate (A25)**

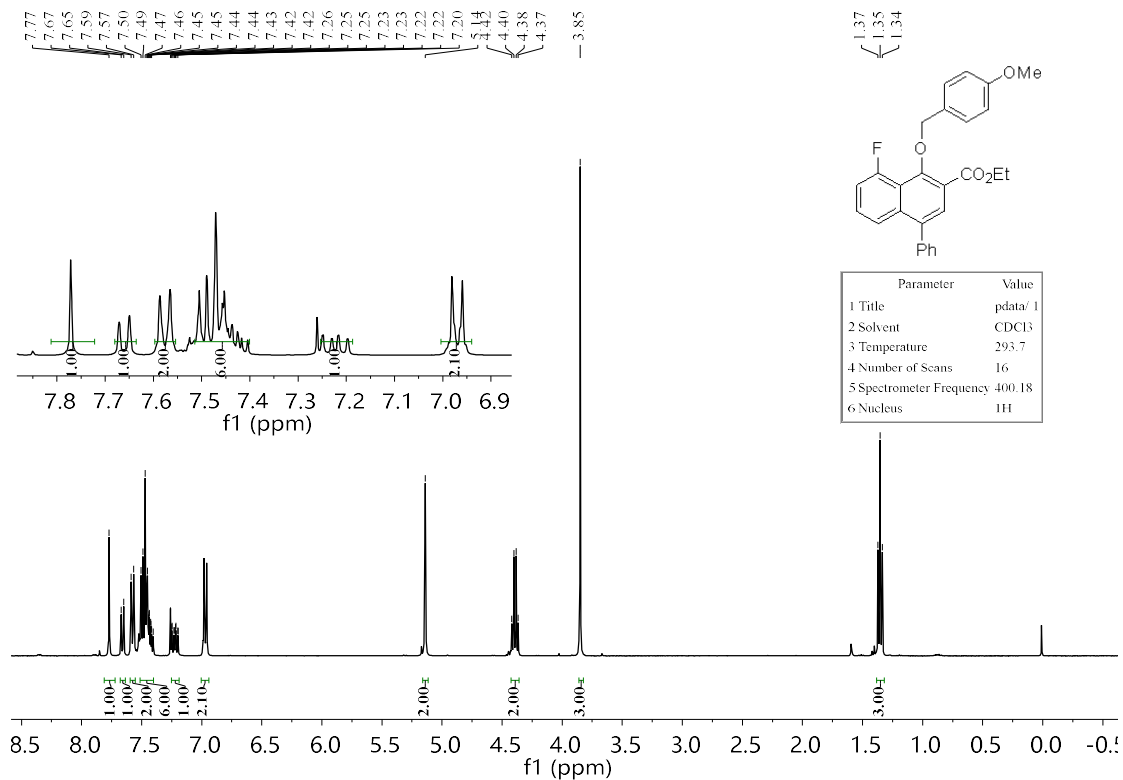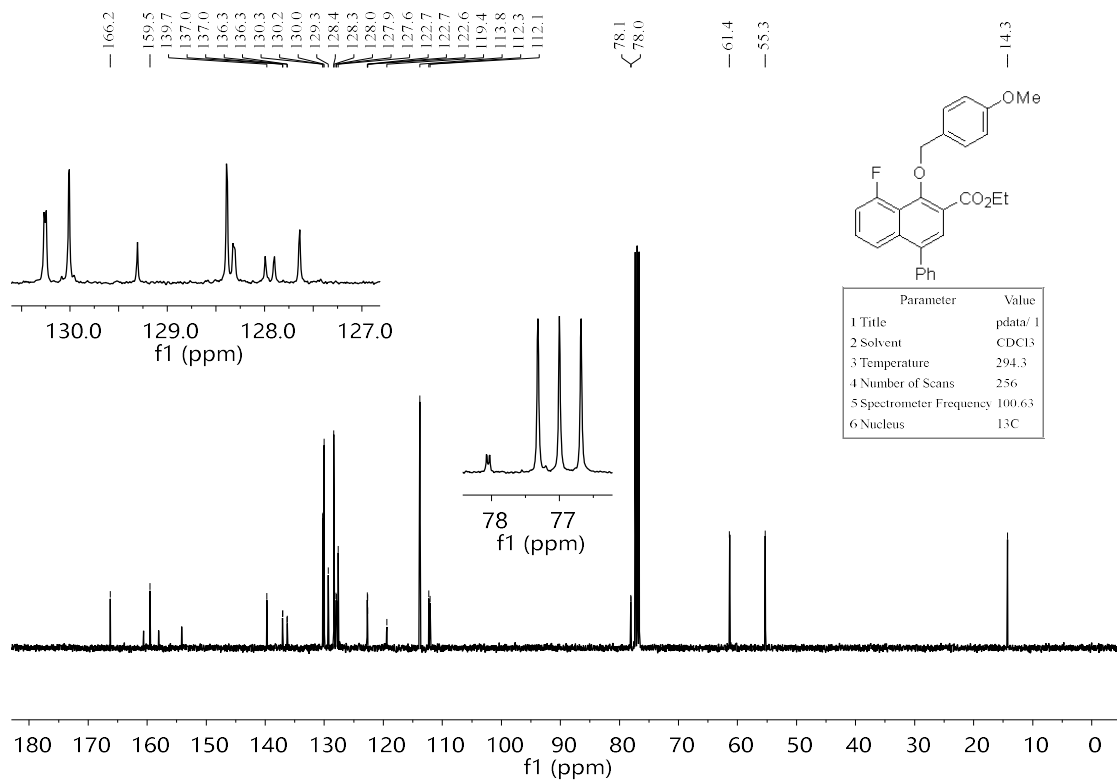

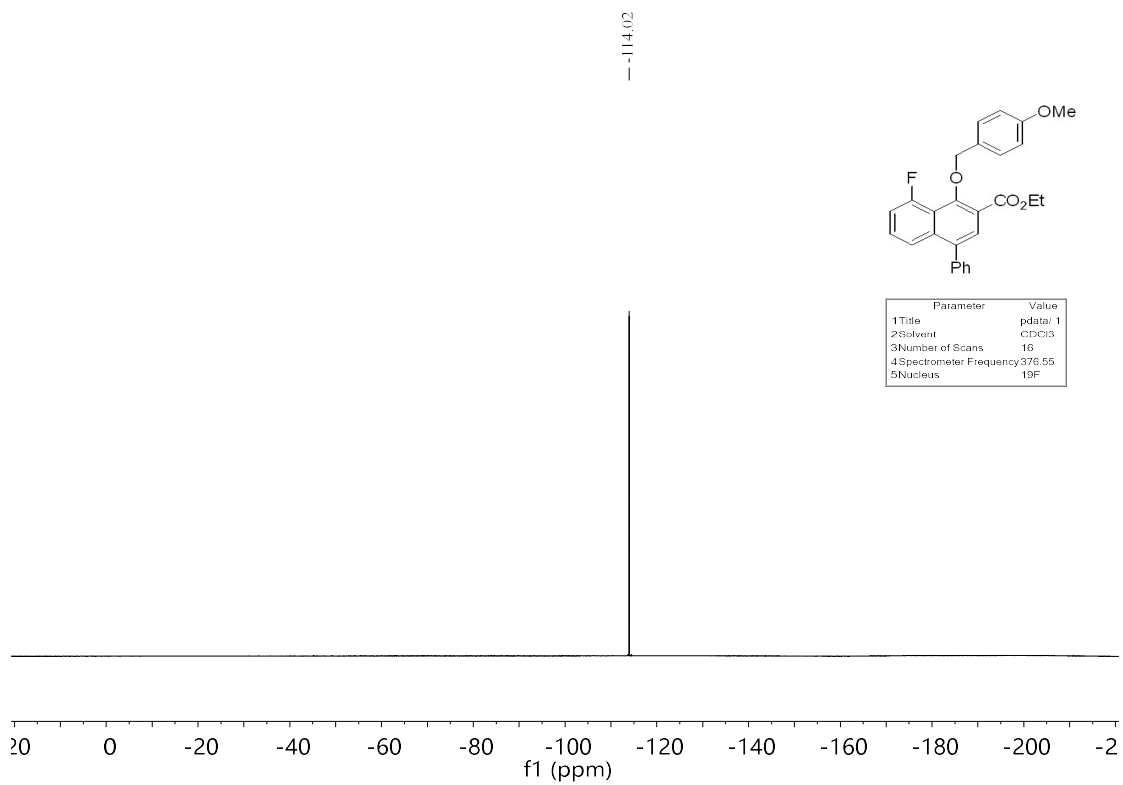

**Ethyl 1-((4-methoxybenzyl)oxy)-8-methyl-4-phenyl-2-naphthoate (A26)**

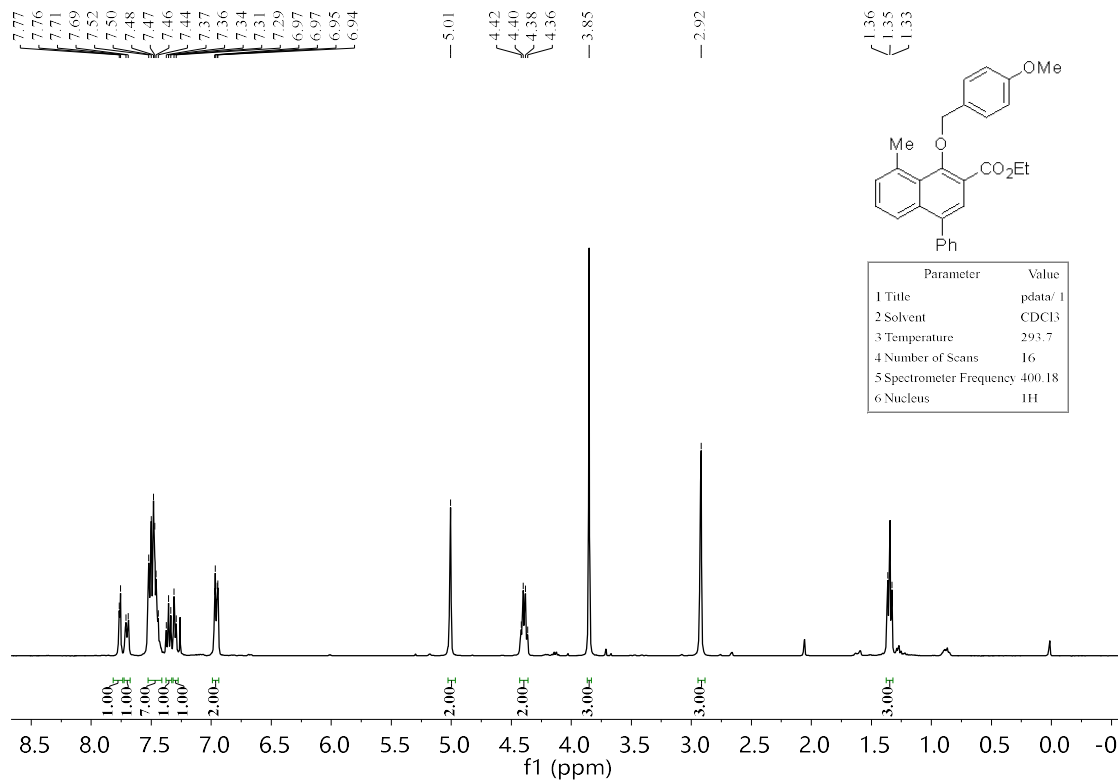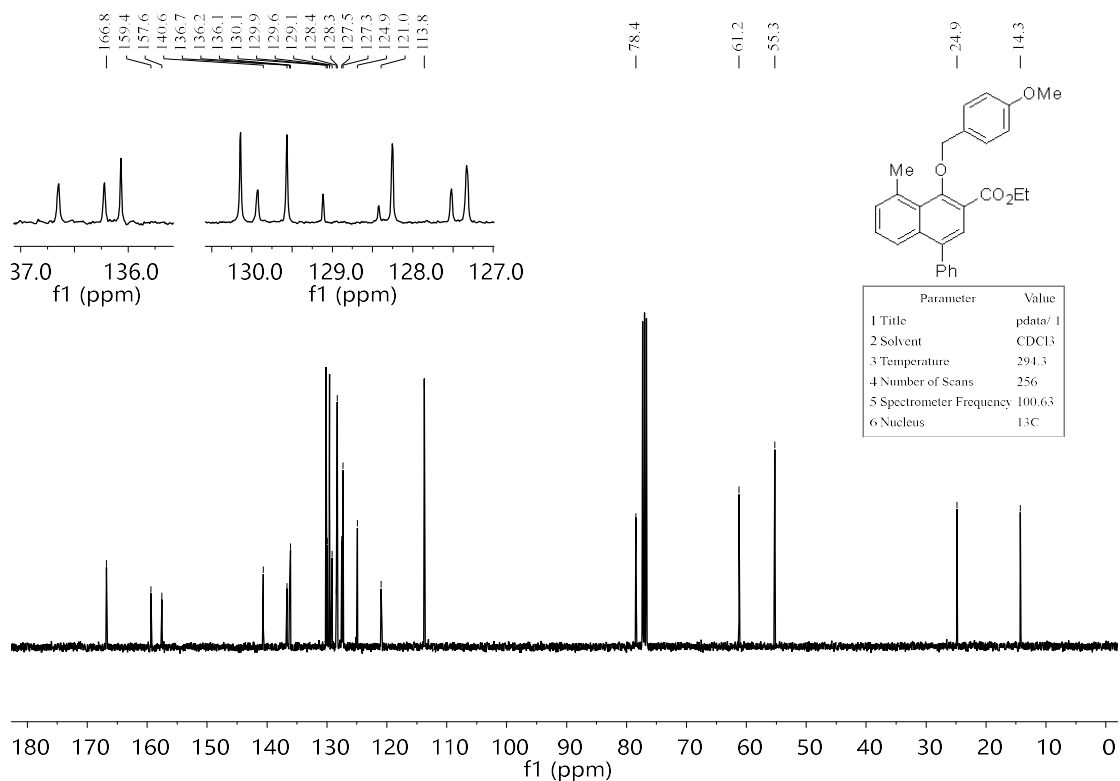

**Ethyl 1-((4-methoxybenzyl)oxy)-5,7-dimethyl-4-phenyl-2-naphthoate (A27)**

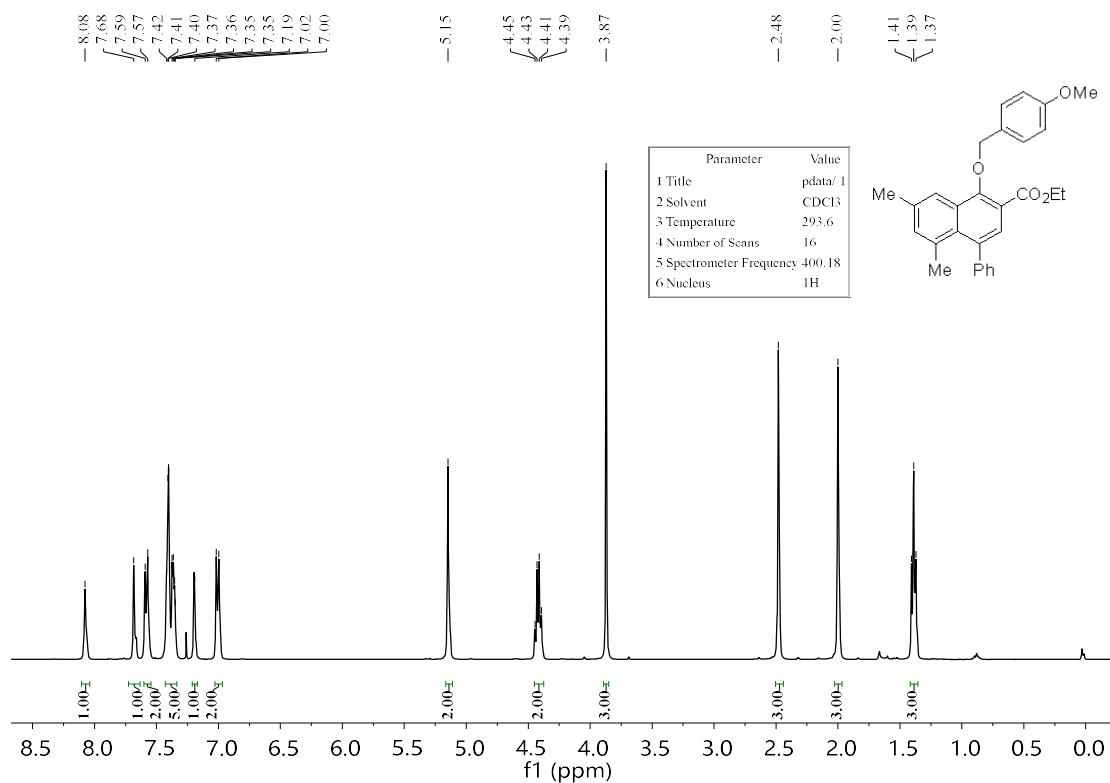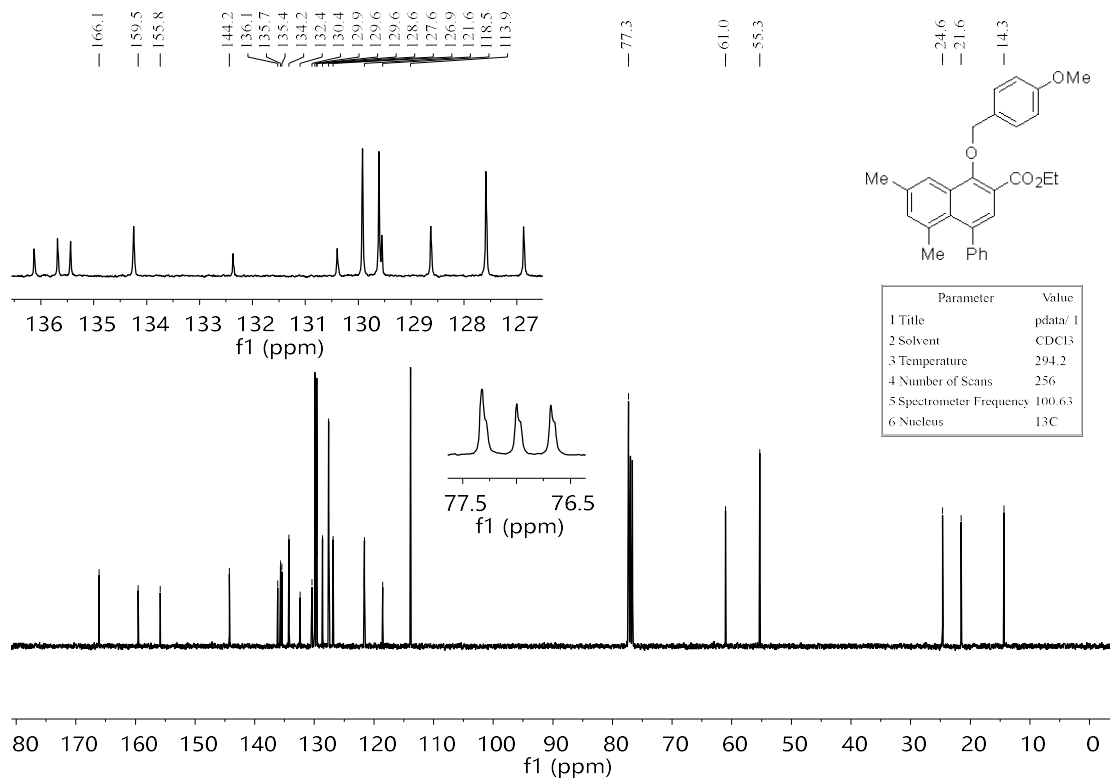

**Ethyl 5,7-dibromo-1-((4-methoxybenzyl)oxy)-4-phenyl-2-naphthoate (A28)**

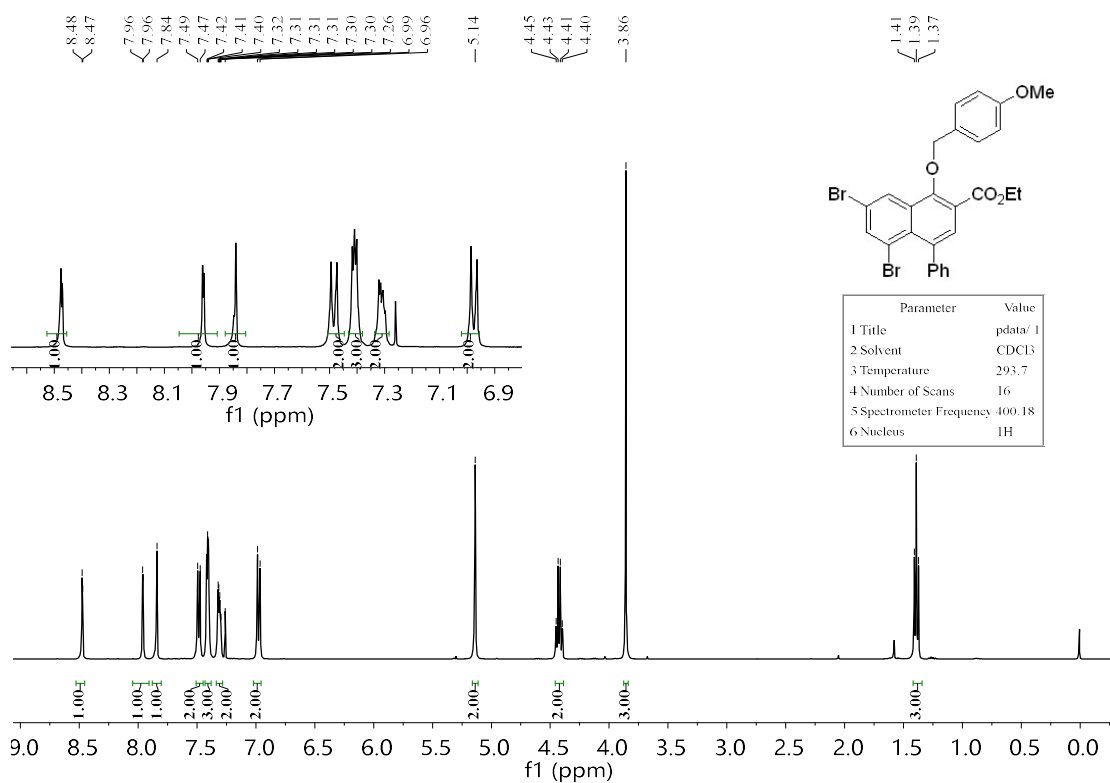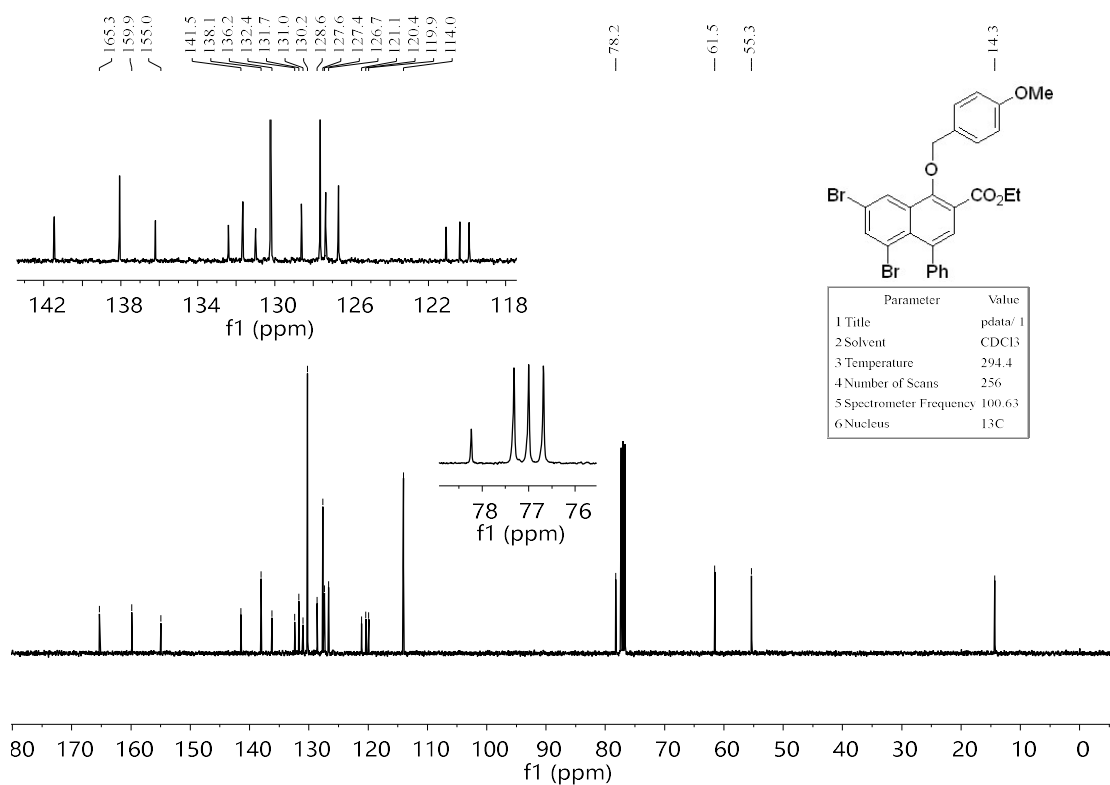

**Ethyl 5,7-dichloro-1-((4-methoxybenzyl)oxy)-4-phenyl-2-naphthoate (A29)**

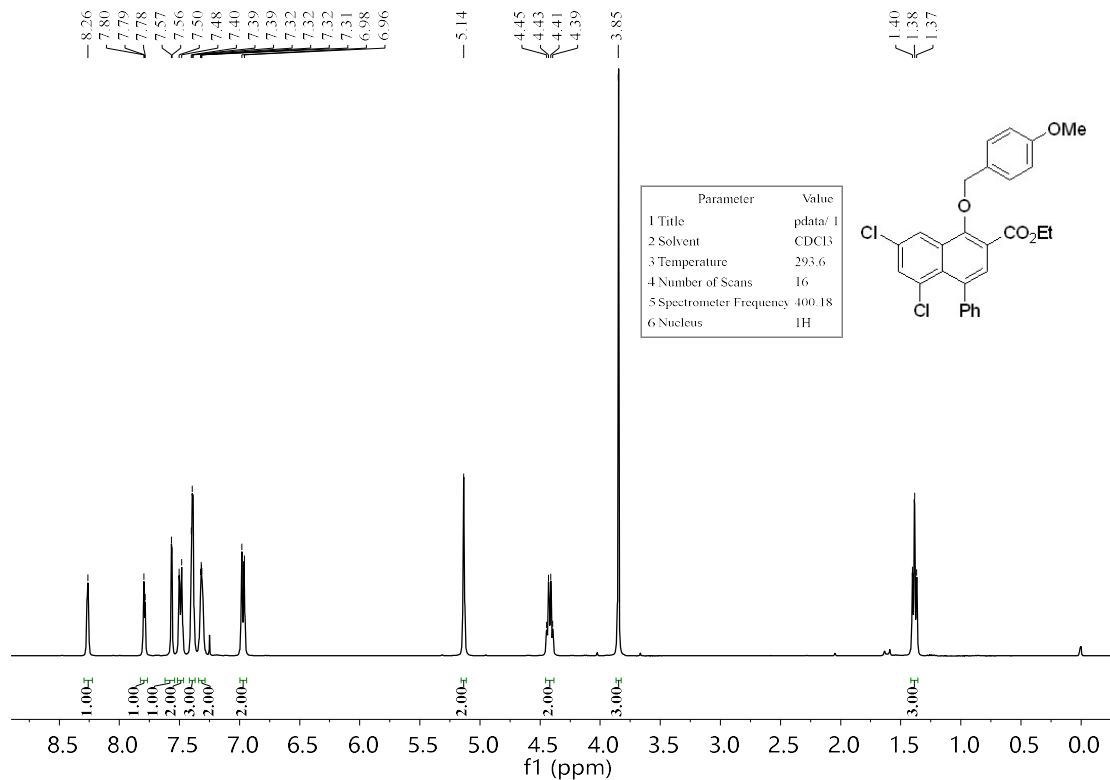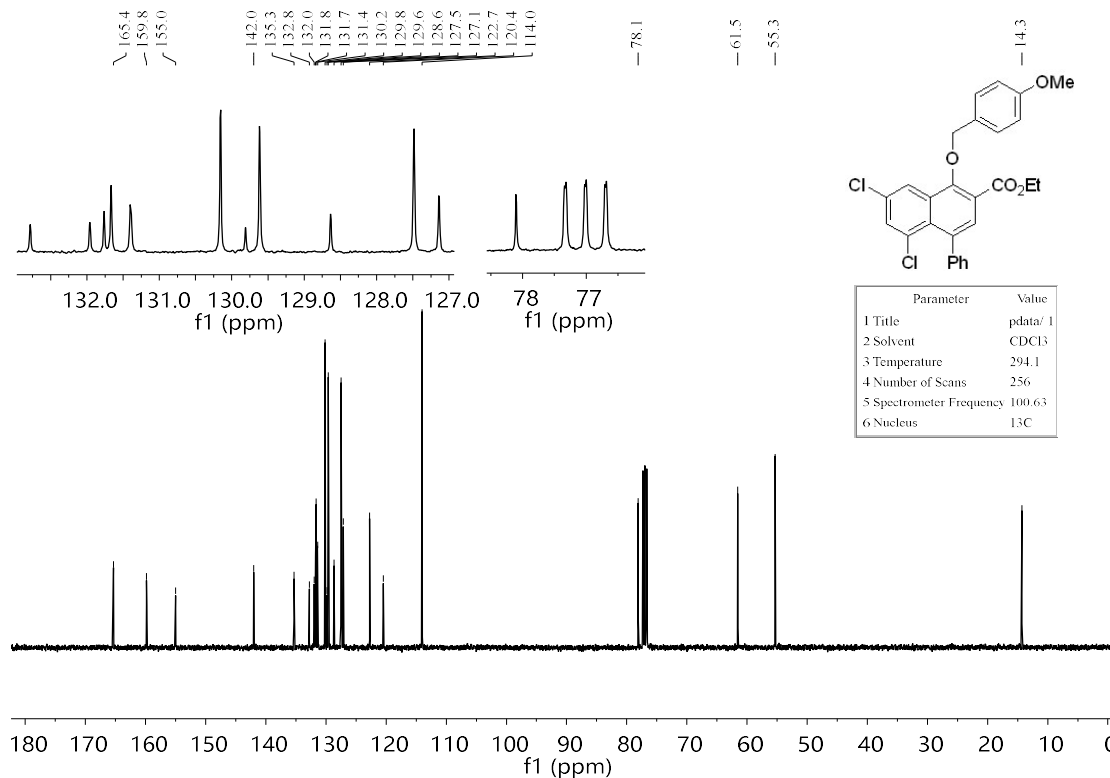

# Ethyl 1-((4-methylbenzyl)oxy)-4-phenyl-2-naphthoate (A30)

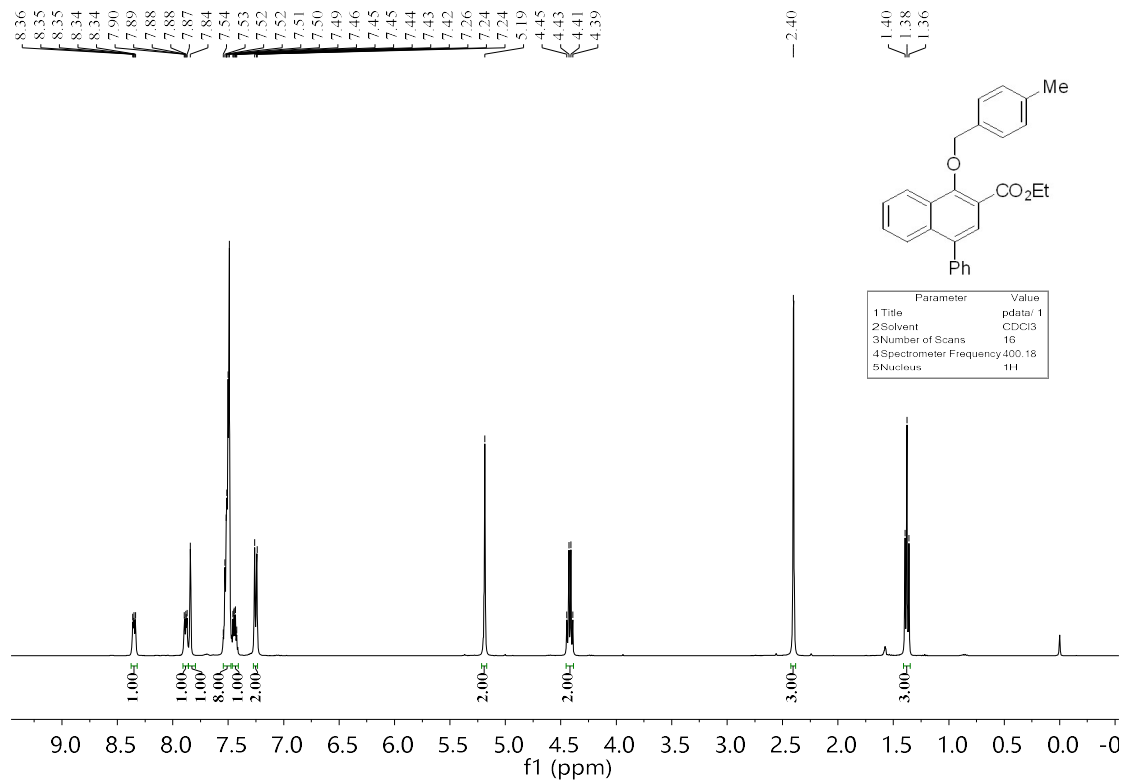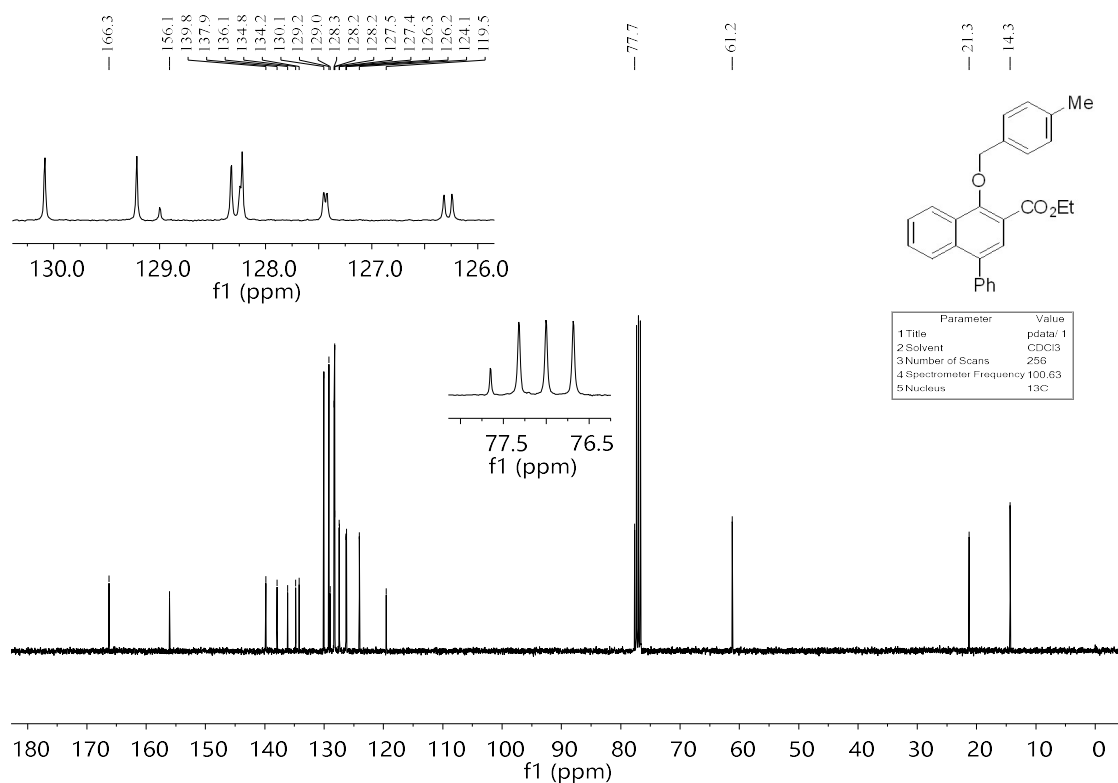



### Ethyl 1-((2-methoxybenzyl)oxy)-4-phenyl-2-naphthoate (A31)

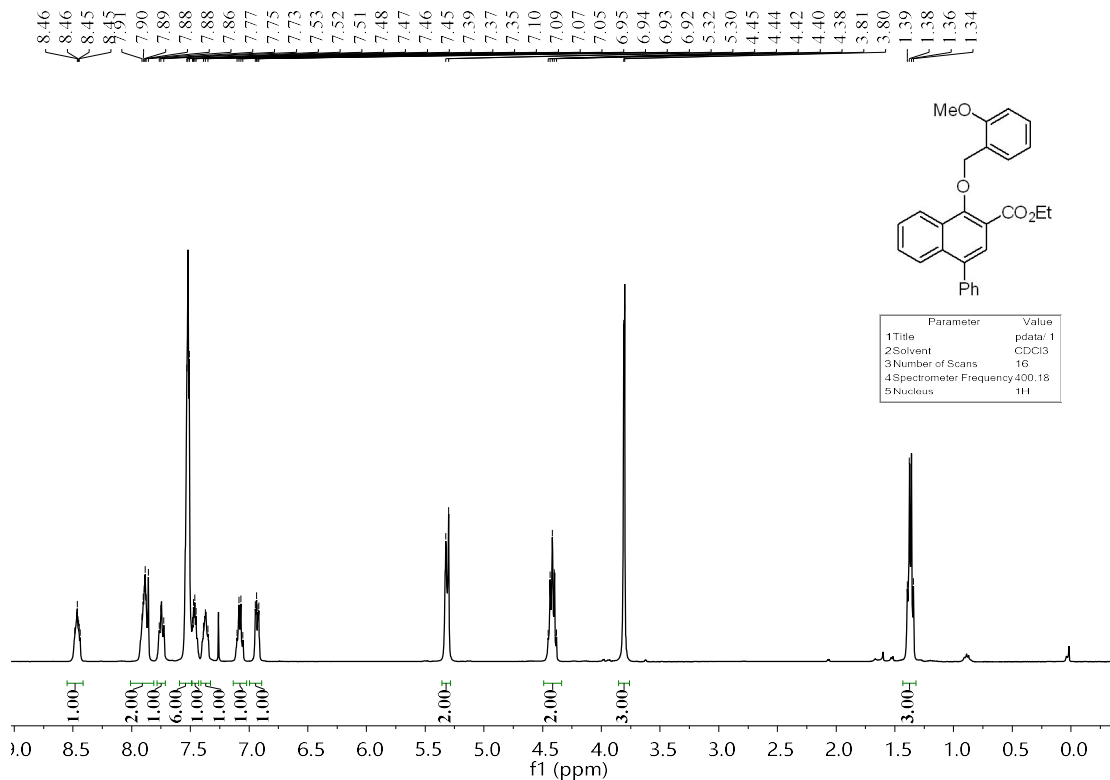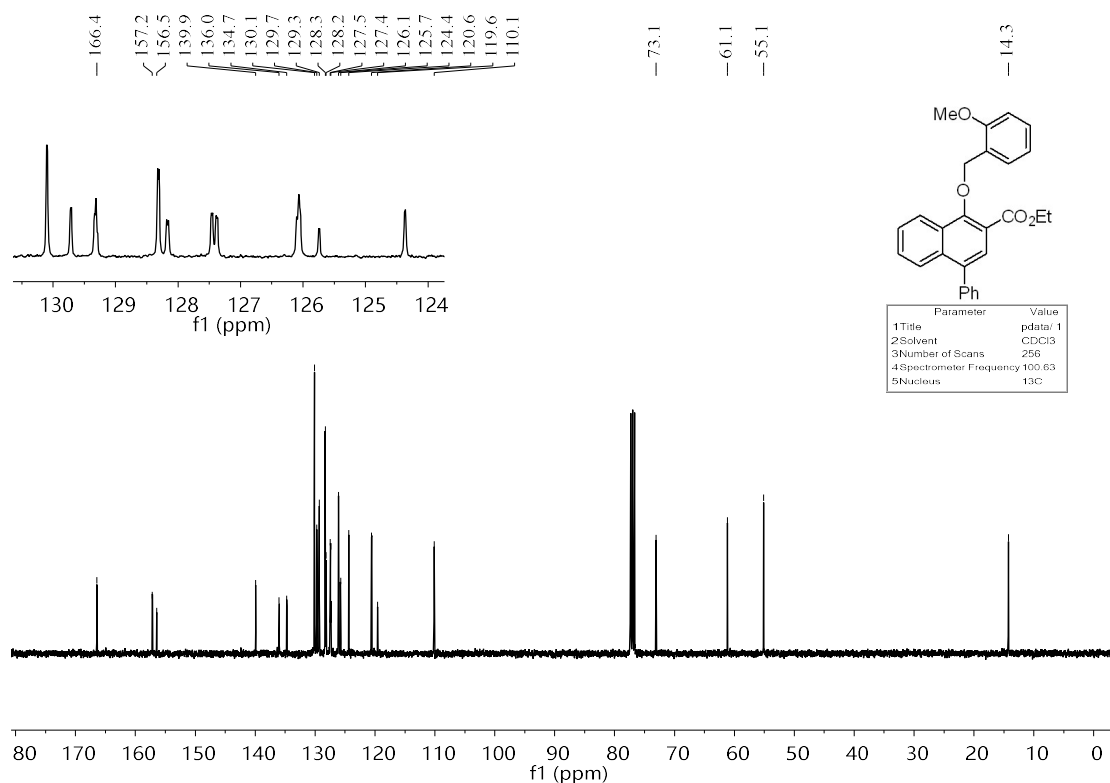

**Ethyl 1-((4-(methylthio)benzyl)oxy)-4-phenyl-2-naphthoate (A32)**

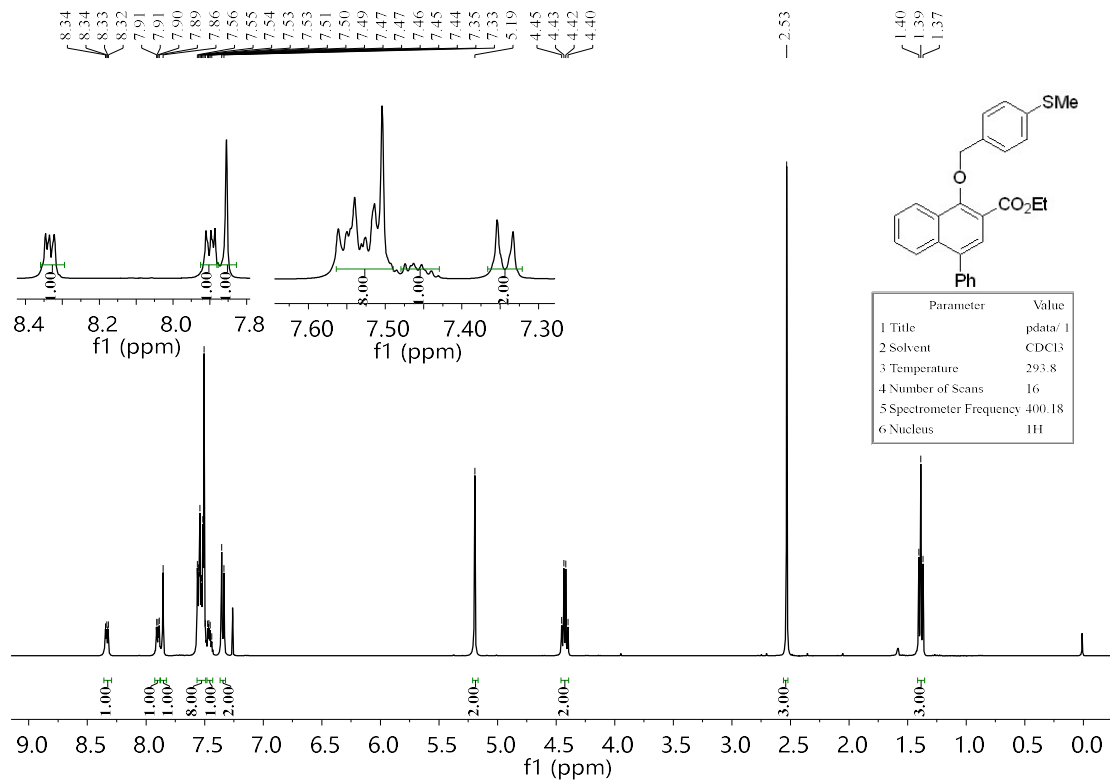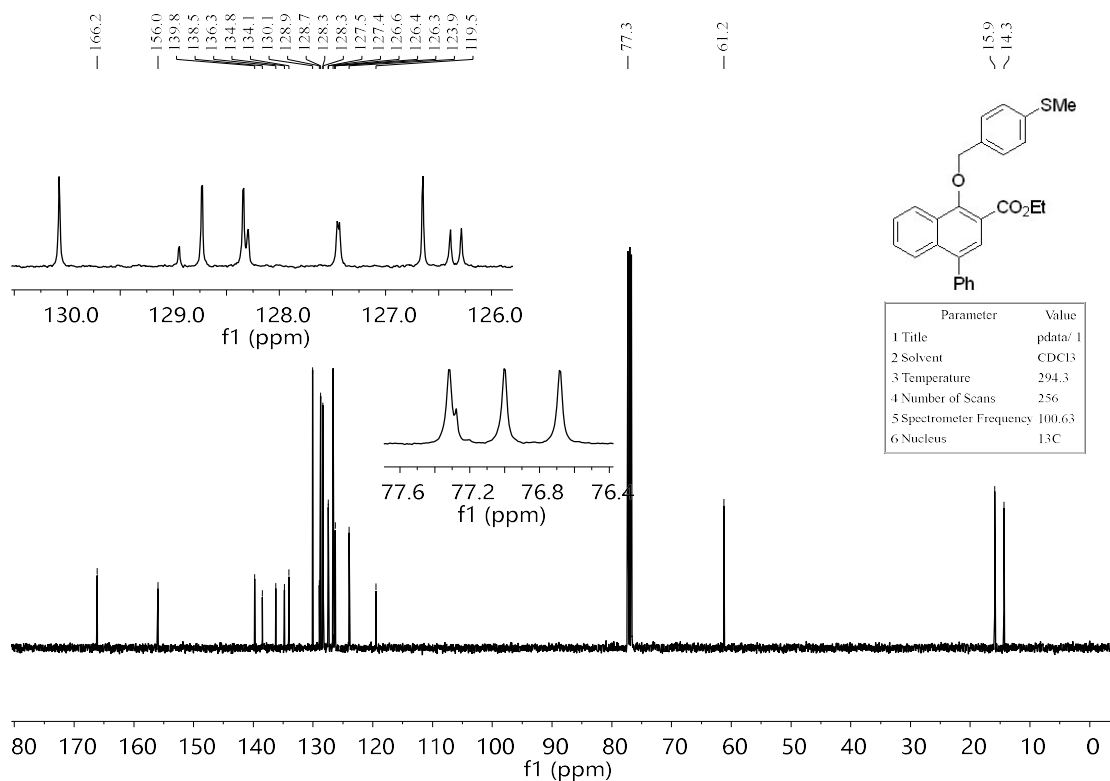

### Ethyl 1-((3,4-dimethoxybenzyl)oxy)-4-phenyl-2-naphthoate (A33)

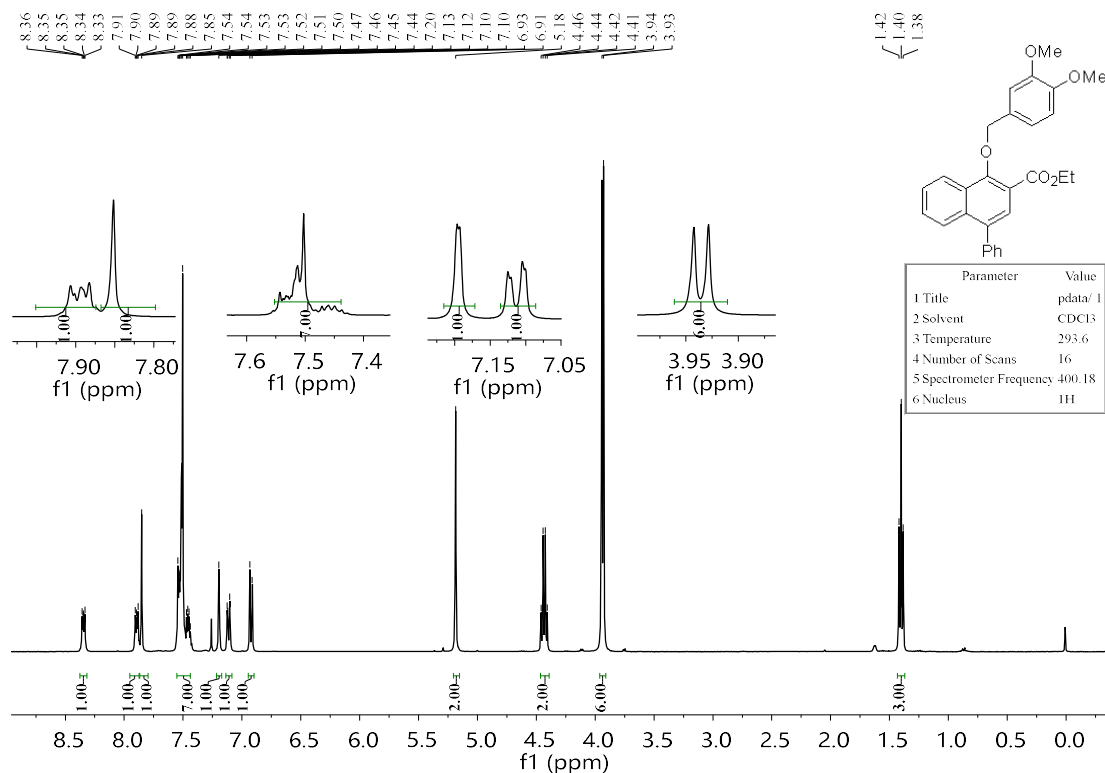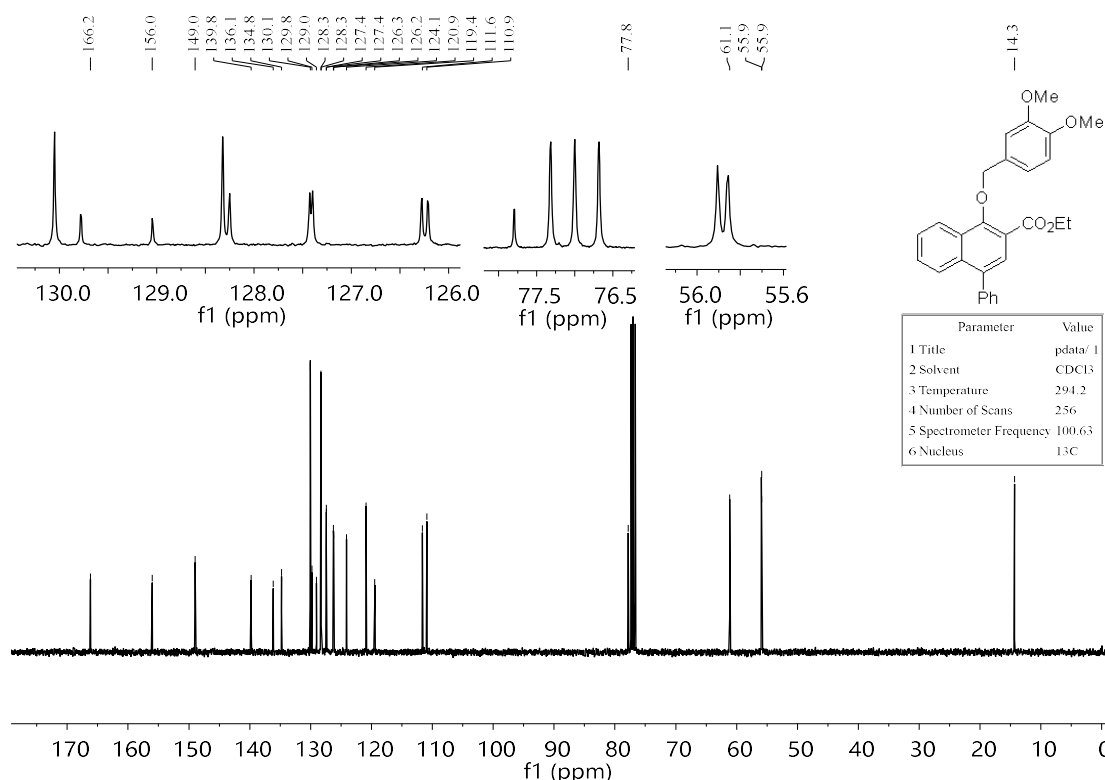

**Ethyl 4-phenyl-1-((3,4,5-trimethoxybenzyl)oxy)-2-naphthoate (A34)**

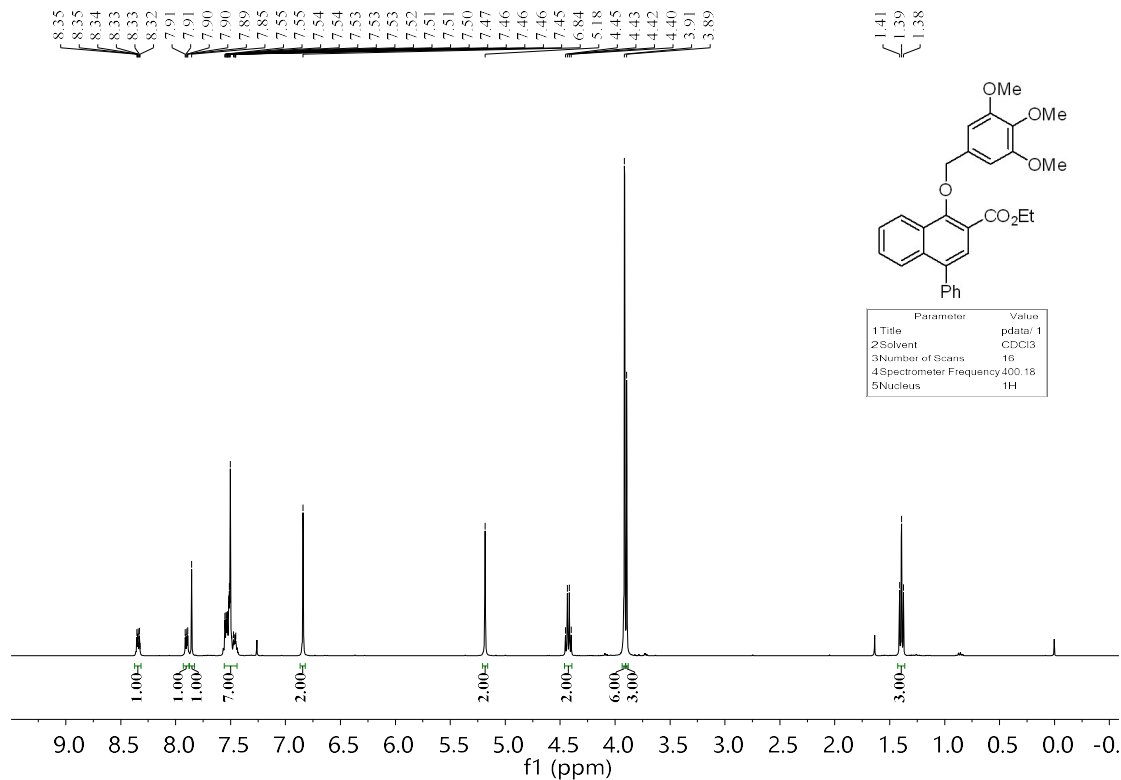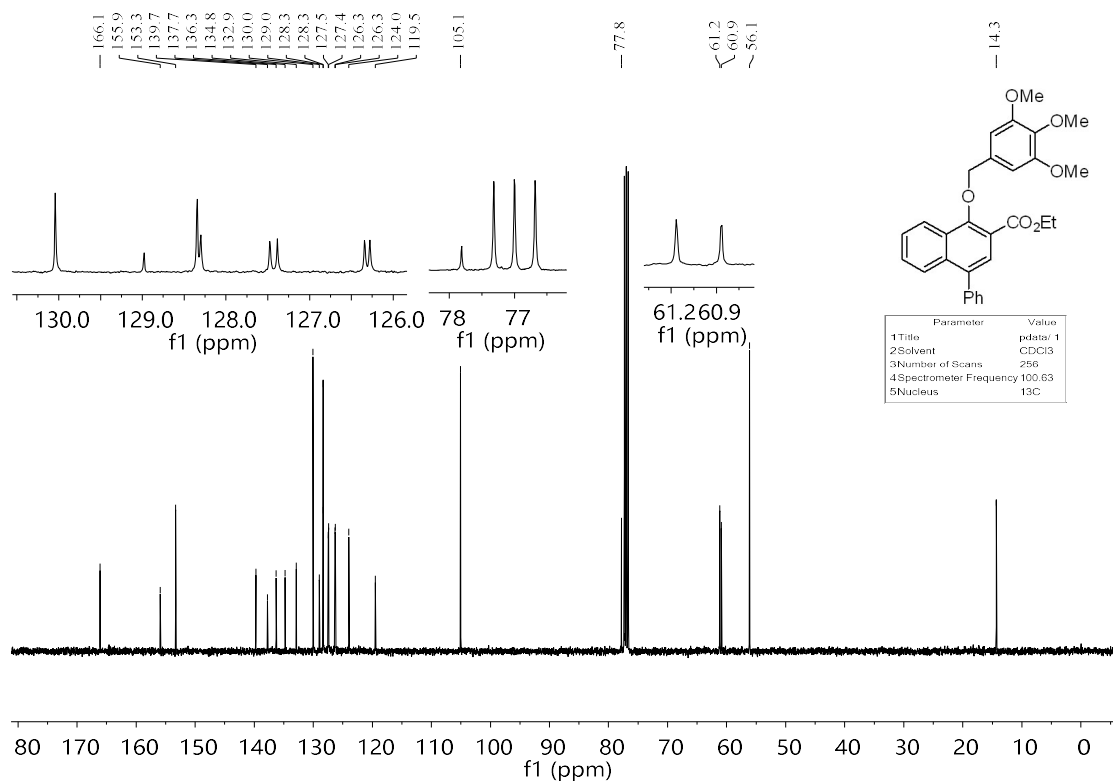

**Ethyl 1-((3-fluoro-4-methoxybenzyl)oxy)-4-phenyl-2-naphthoate (A35)**

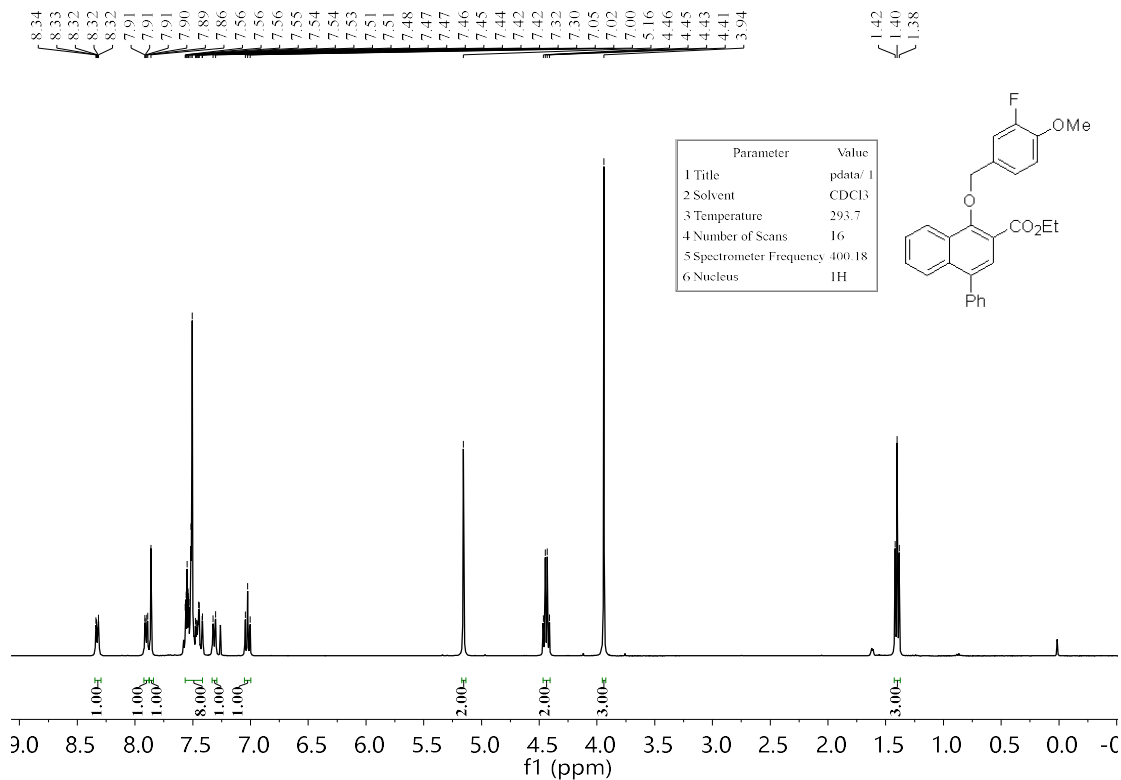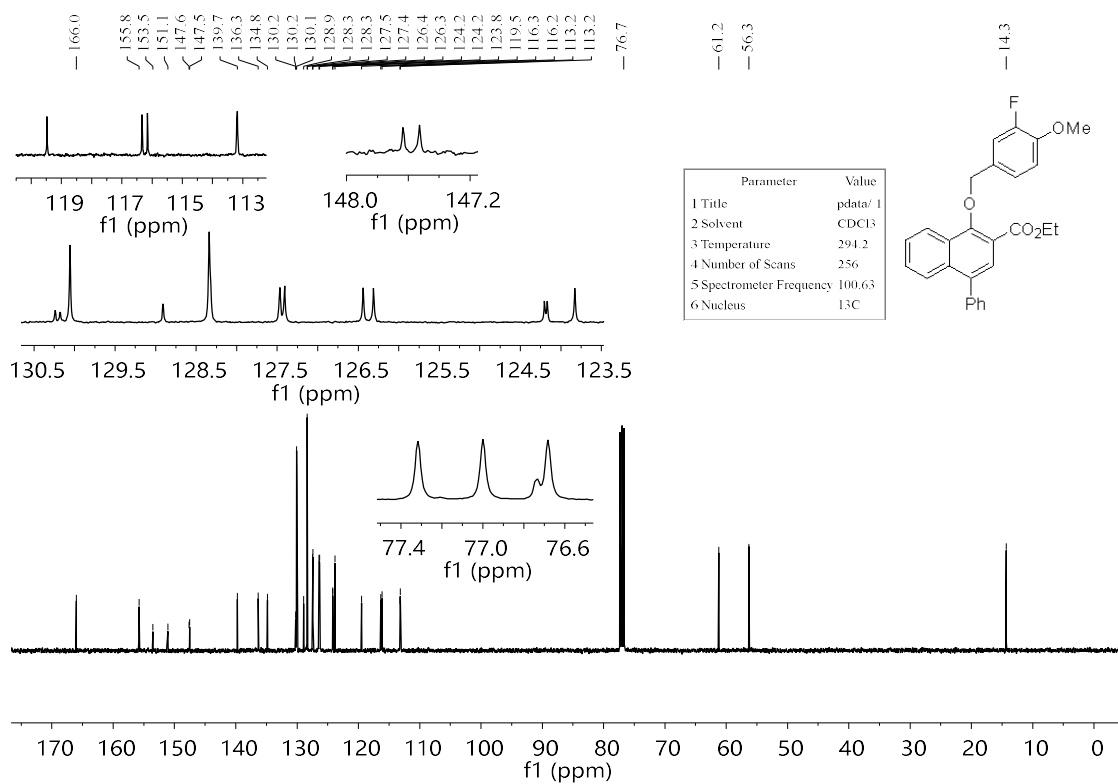

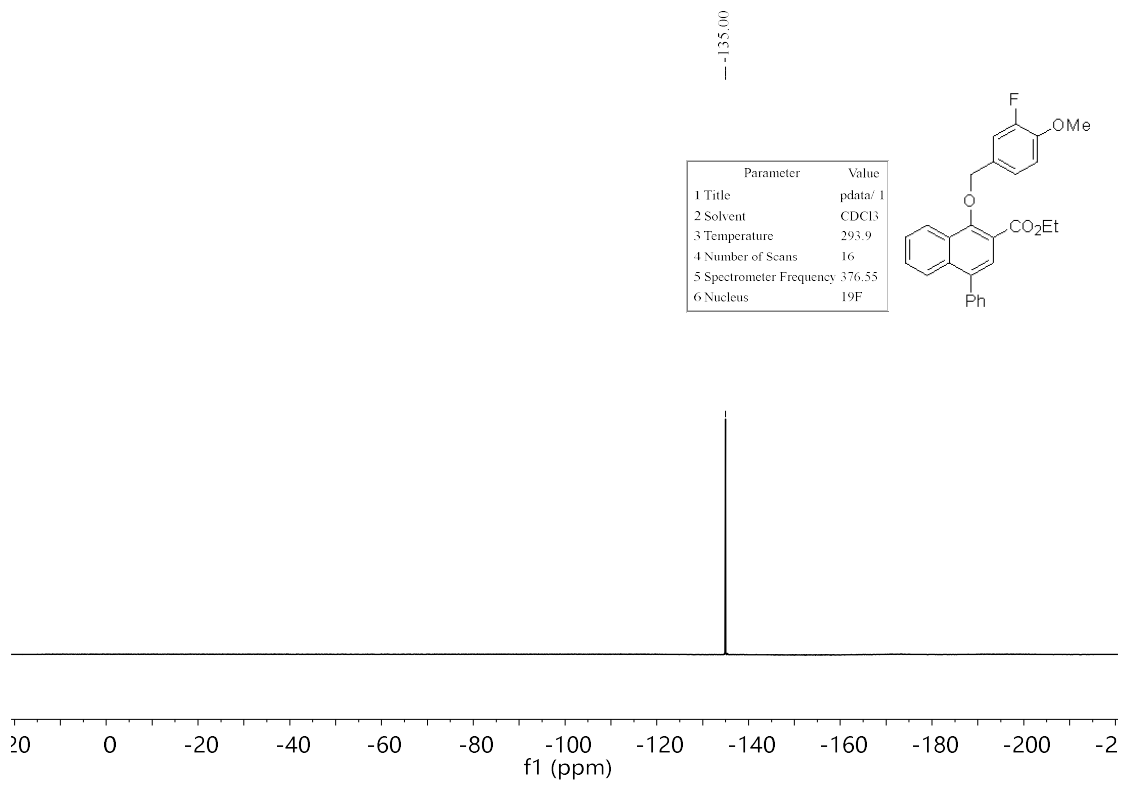

**Ethyl 1-((3-chloro-4-methoxybenzyl)oxy)-4-phenyl-2-naphthoate (A36)**

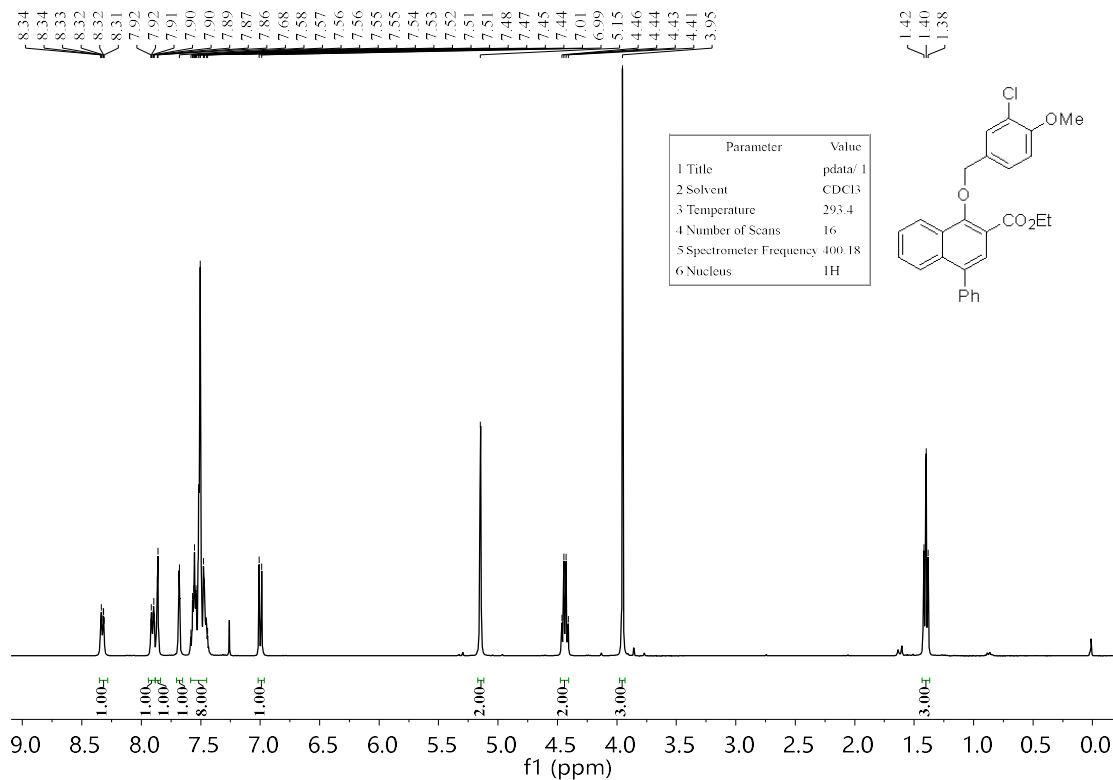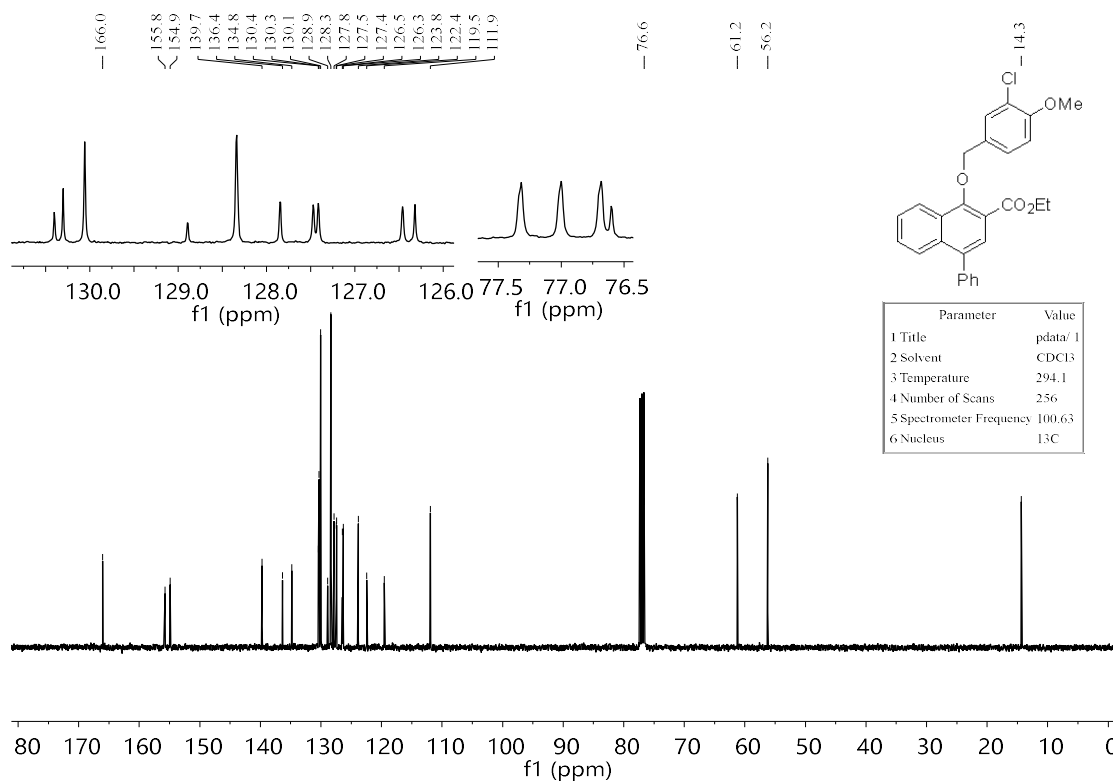

# Ethyl 1-((3-bromo-4-methoxybenzyl)oxy)-4-phenyl-2-naphthoate (A37)

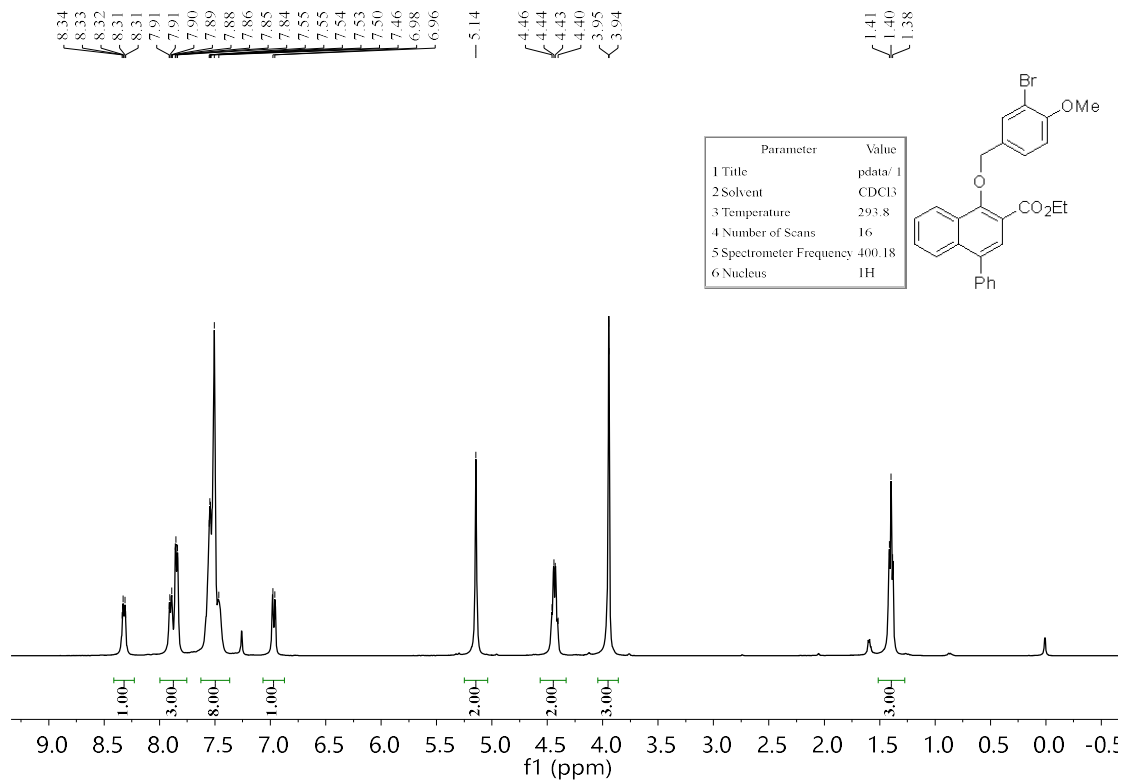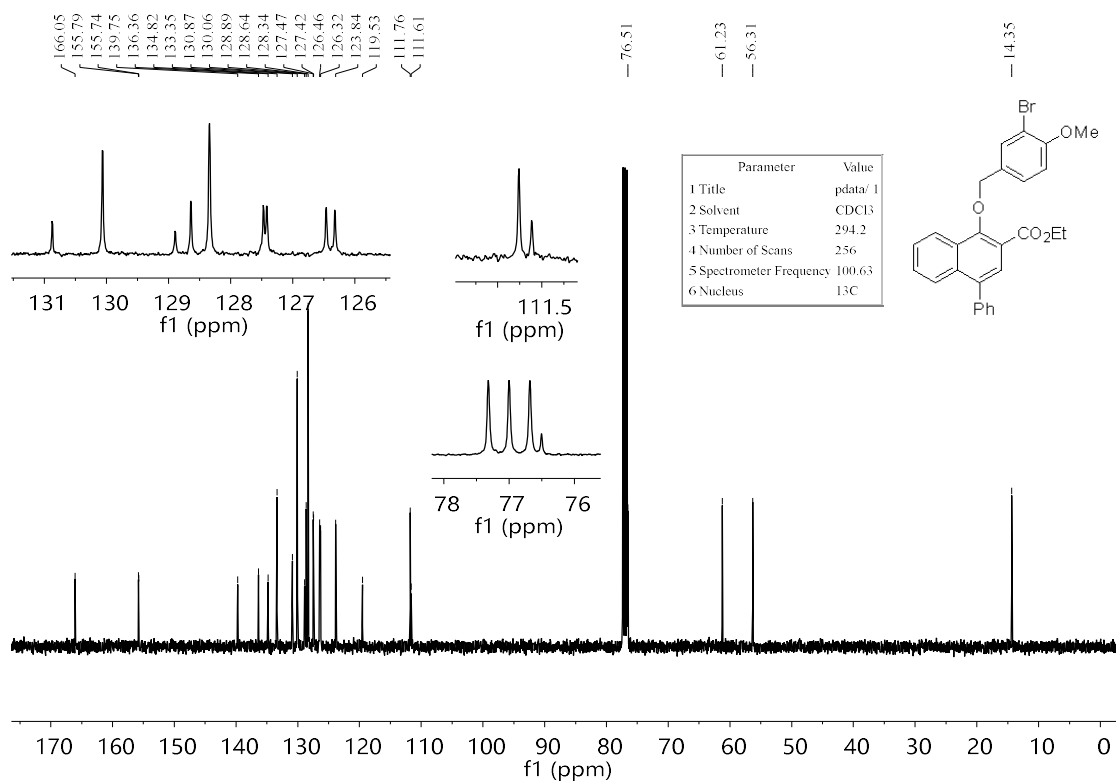



# Ethyl 1-(benzofuran-5-ylmethoxy)-4-phenyl-2-naphthoate (A38)

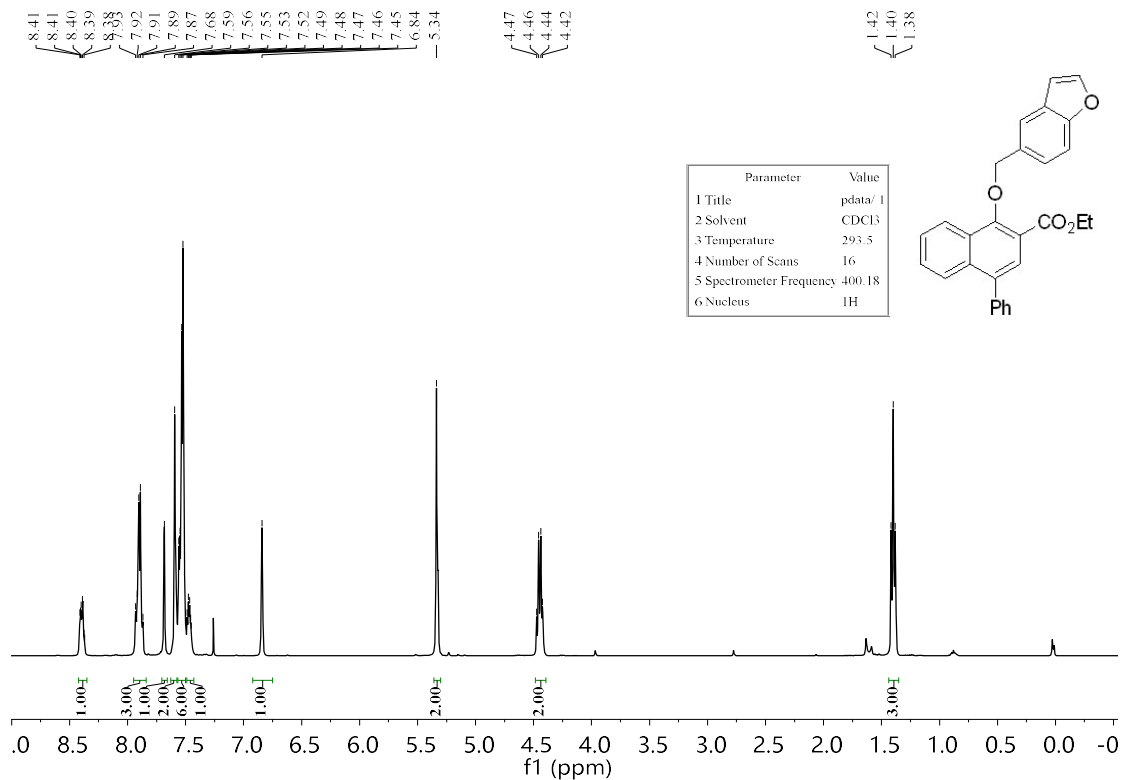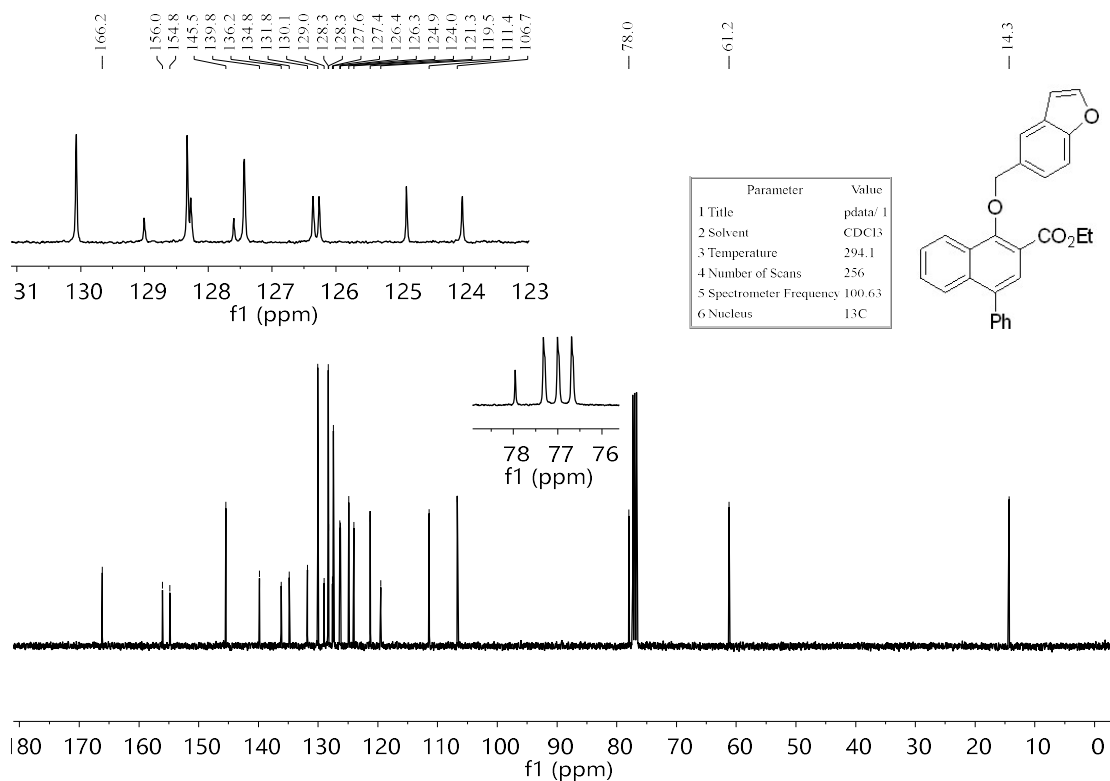

**Ethyl 1-((2,3-dihydrobenzofuran-5-yl)methoxy)-4-phenyl-2-naphthoate (A39)**

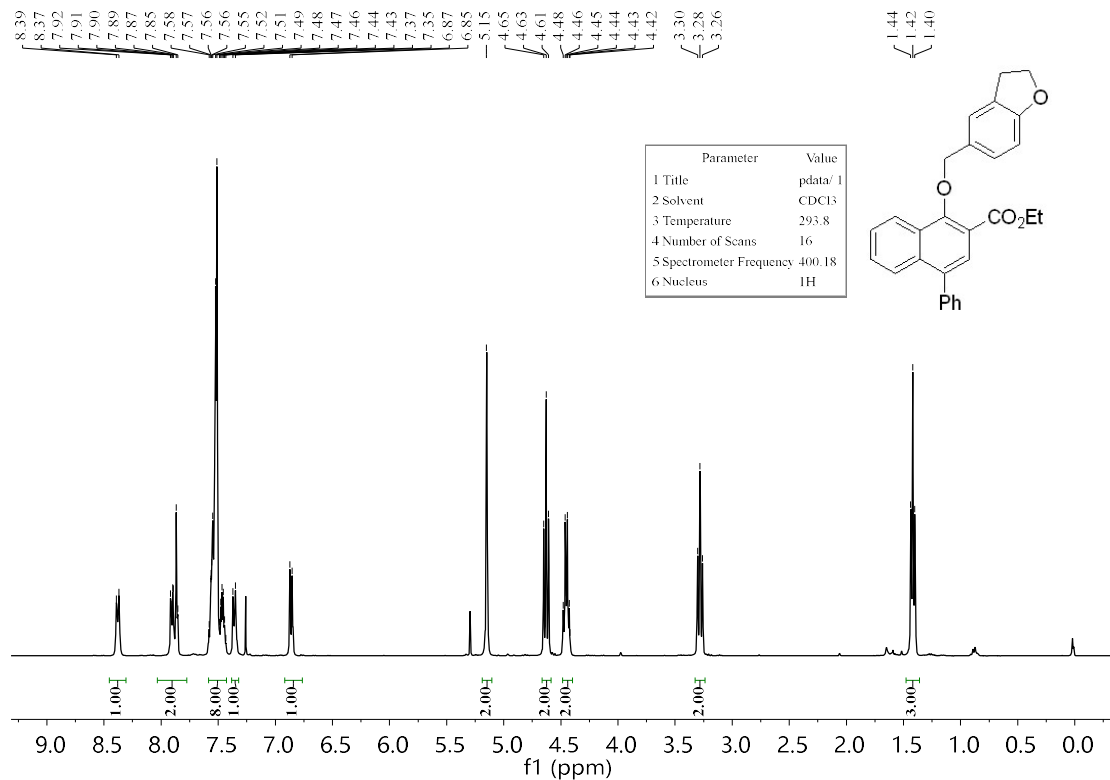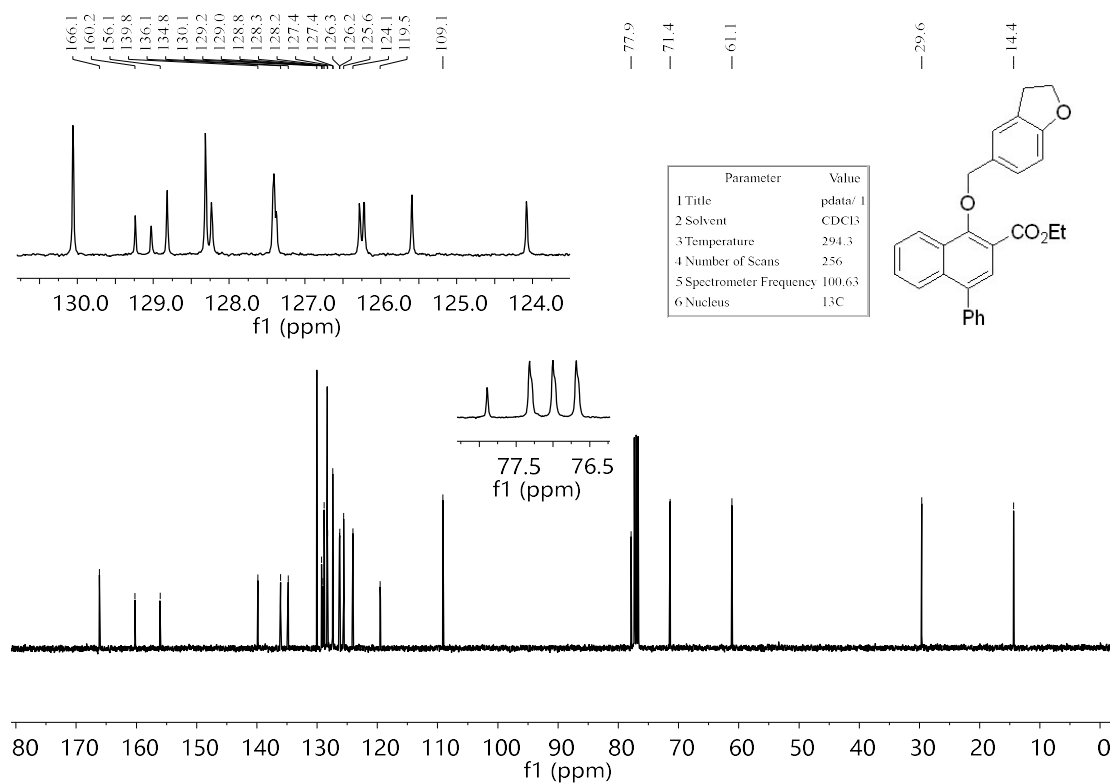

# Ethyl 1-(benzo[d][1,3]dioxol-5-ylmethoxy)-4-phenyl-2-naphthoate (A40)

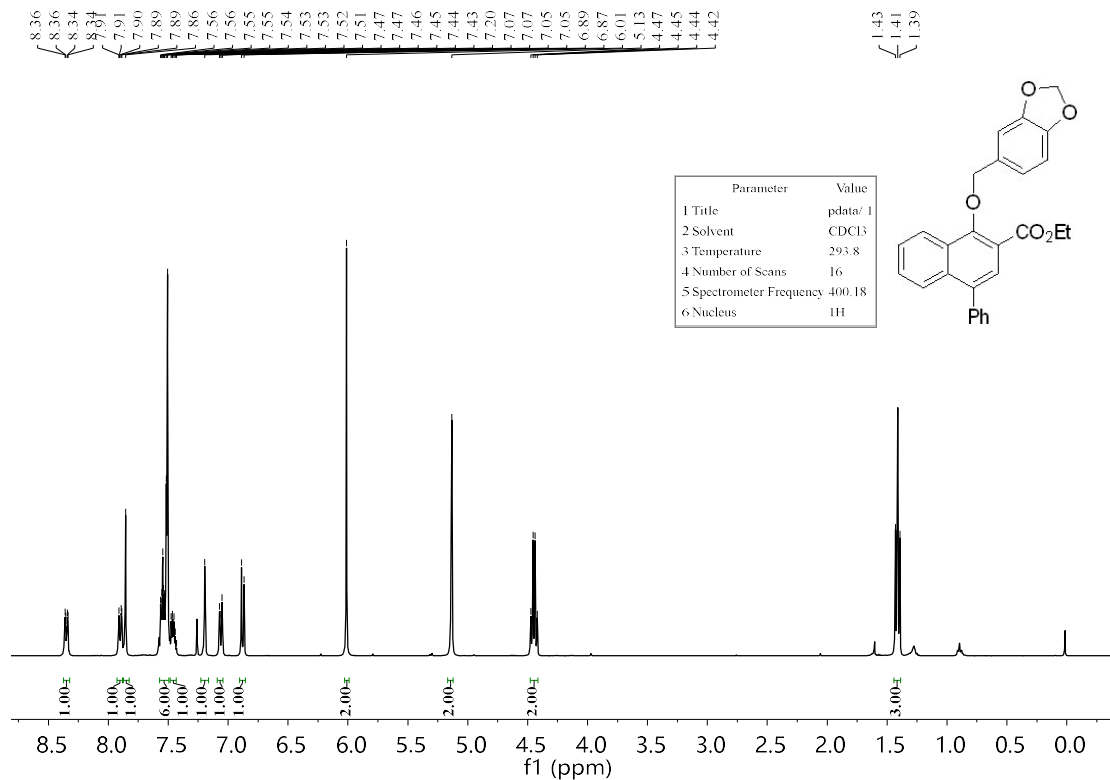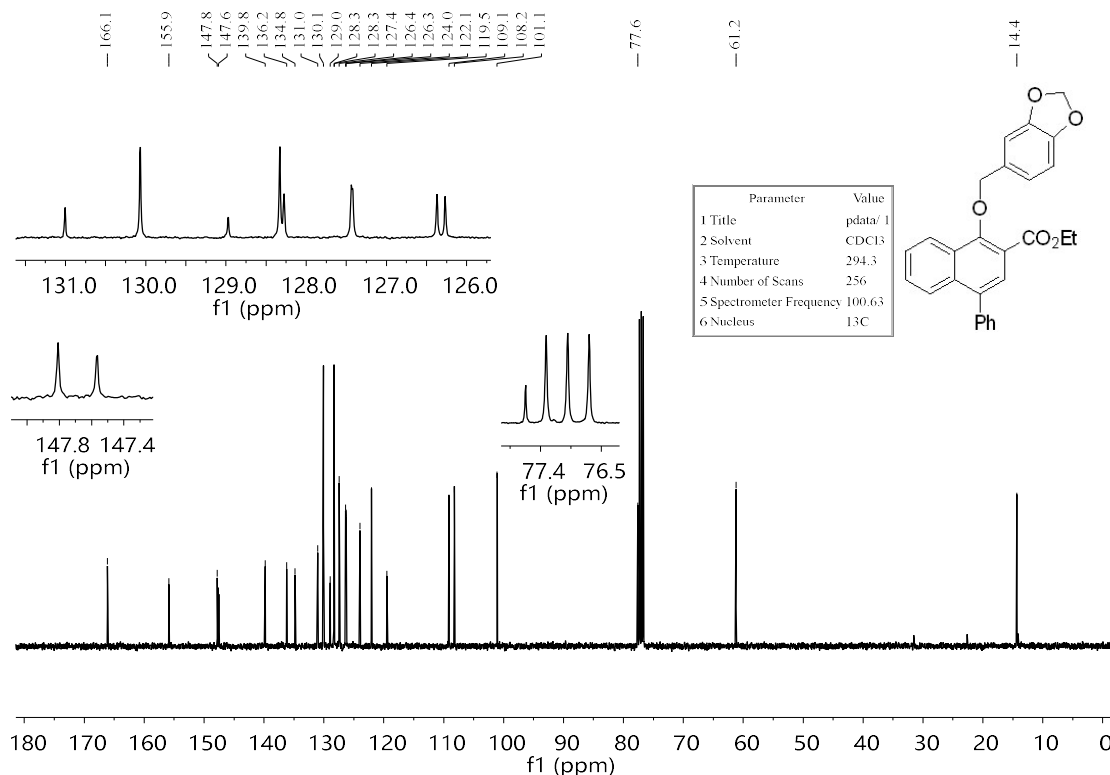

### Ethyl 1-((2,3-dihydrobenzo[b][1,4]dioxin-6-yl)methoxy)-4-phenyl-2-naphthoate (A41)

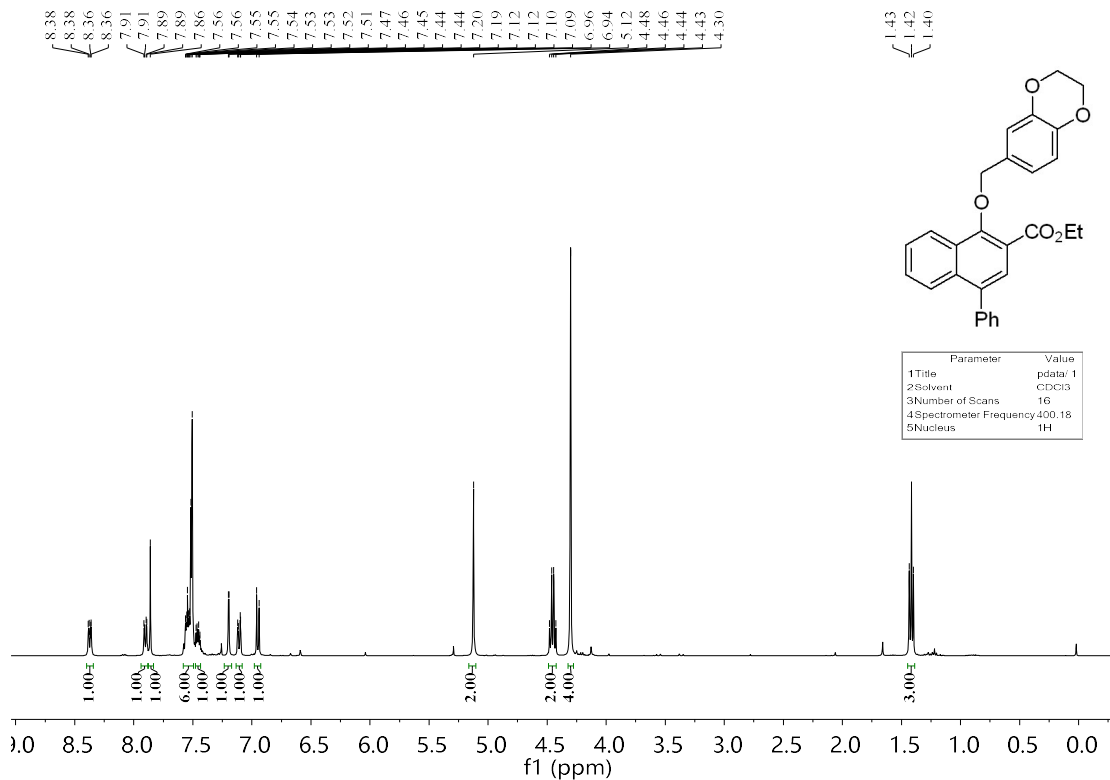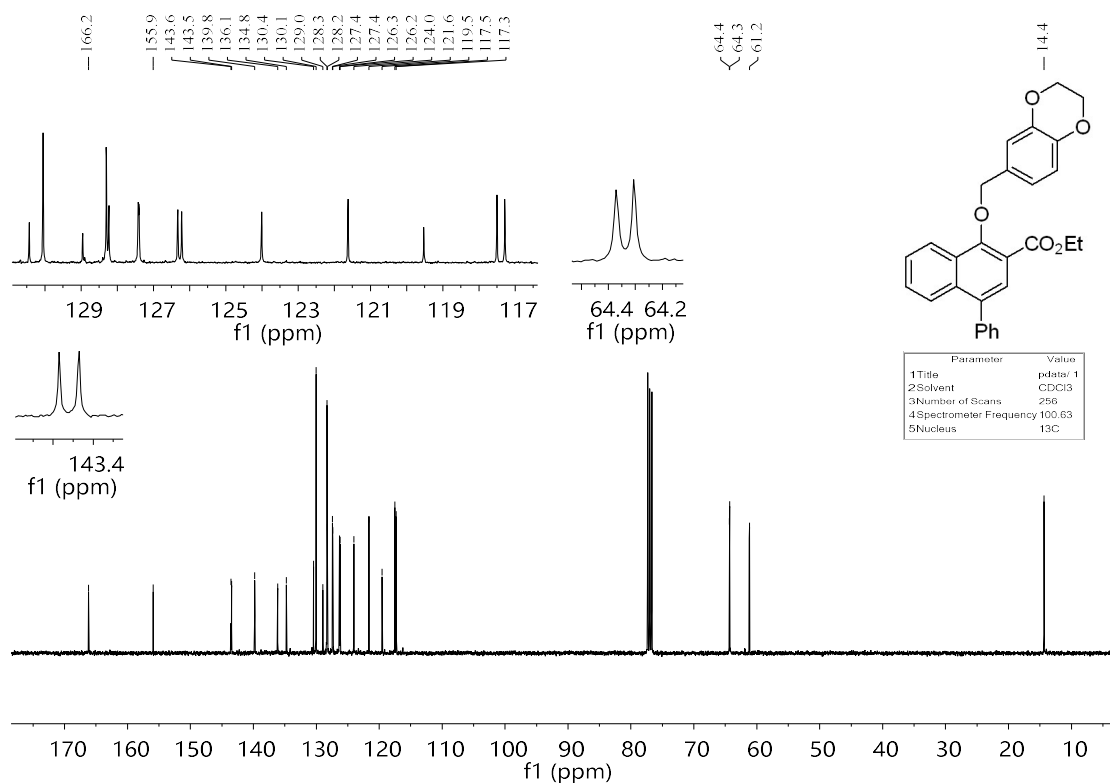

### Ethyl 1-((4-methoxynaphthalen-1-yl)methoxy)-4-phenyl-2-naphthoate (A42)

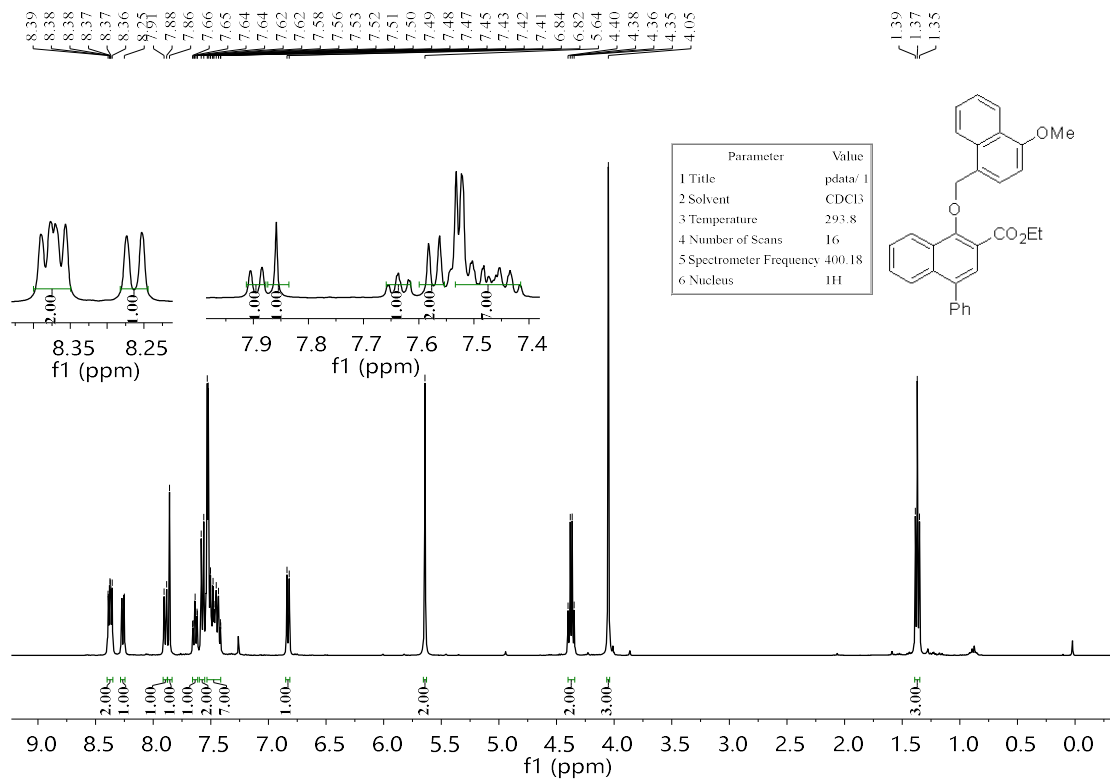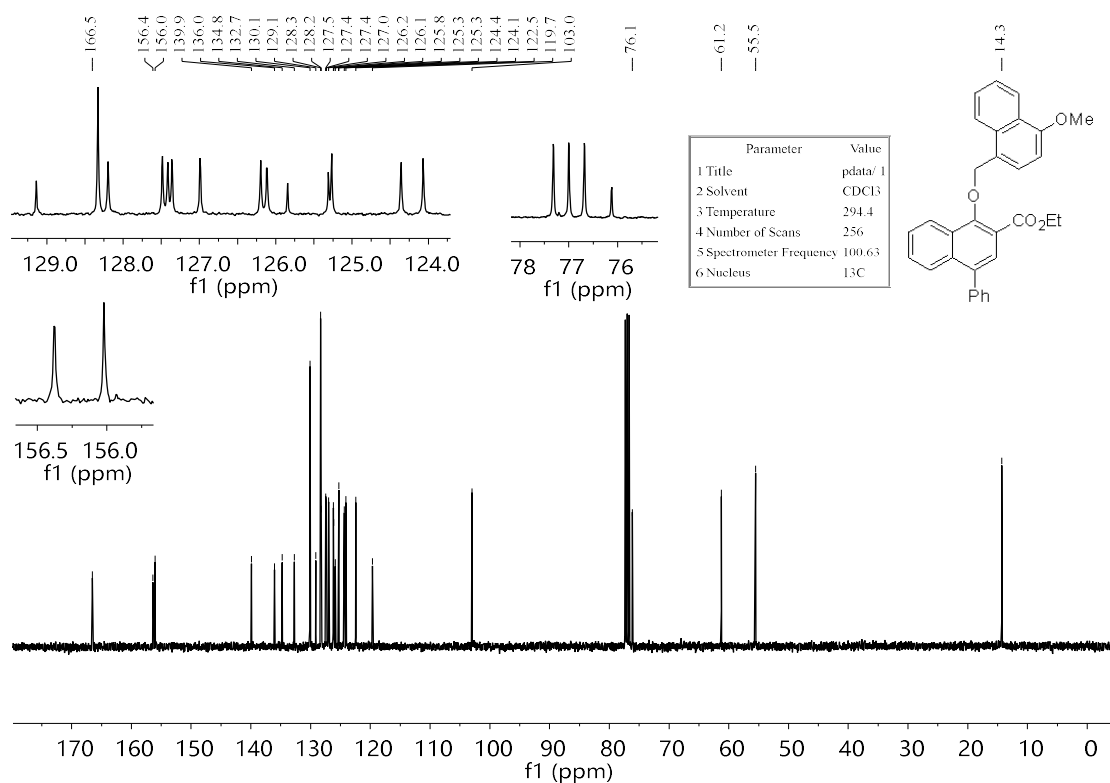

### Ethyl 1-(furan-2-ylmethoxy)-4-phenyl-2-naphthoate (A43)

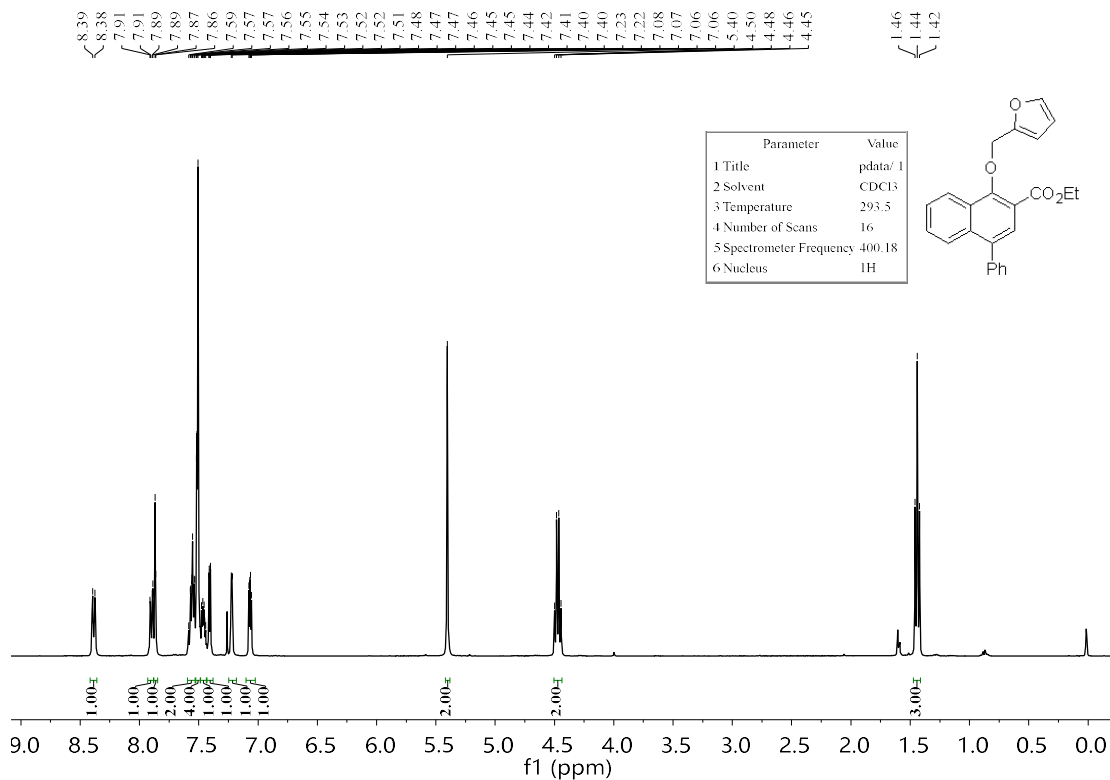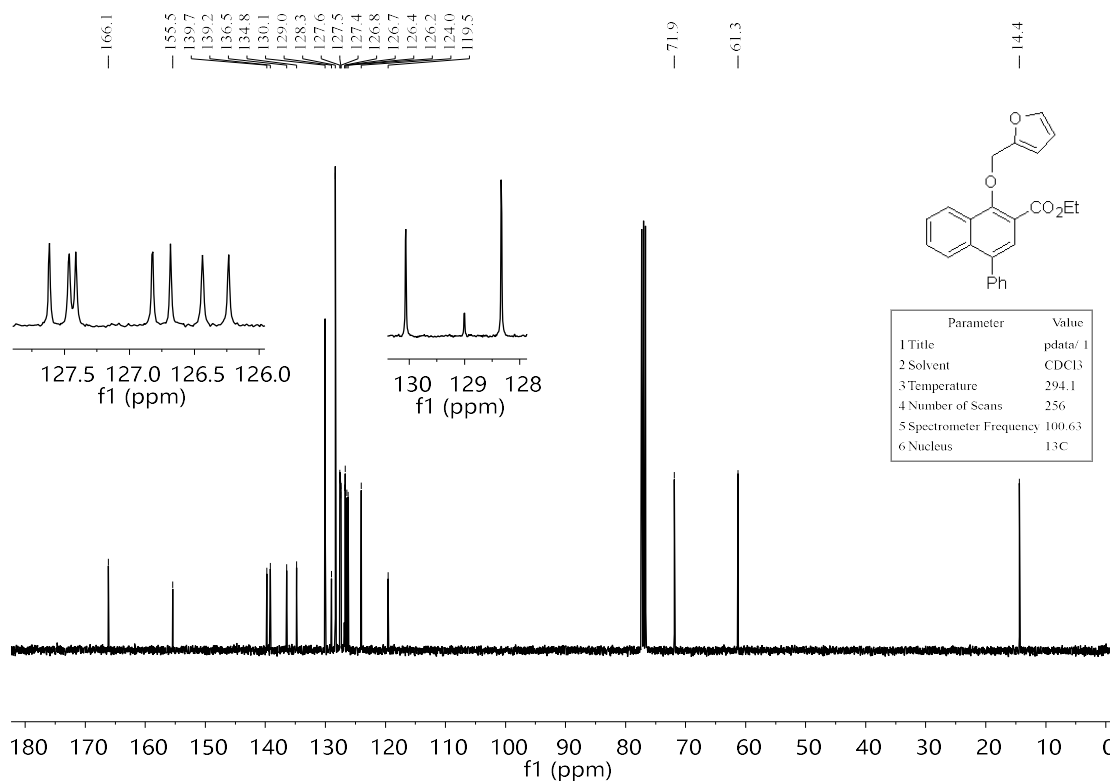

### Ethyl 4-phenyl-1-(thiophen-2-ylmethoxy)-2-naphthoate (A44)

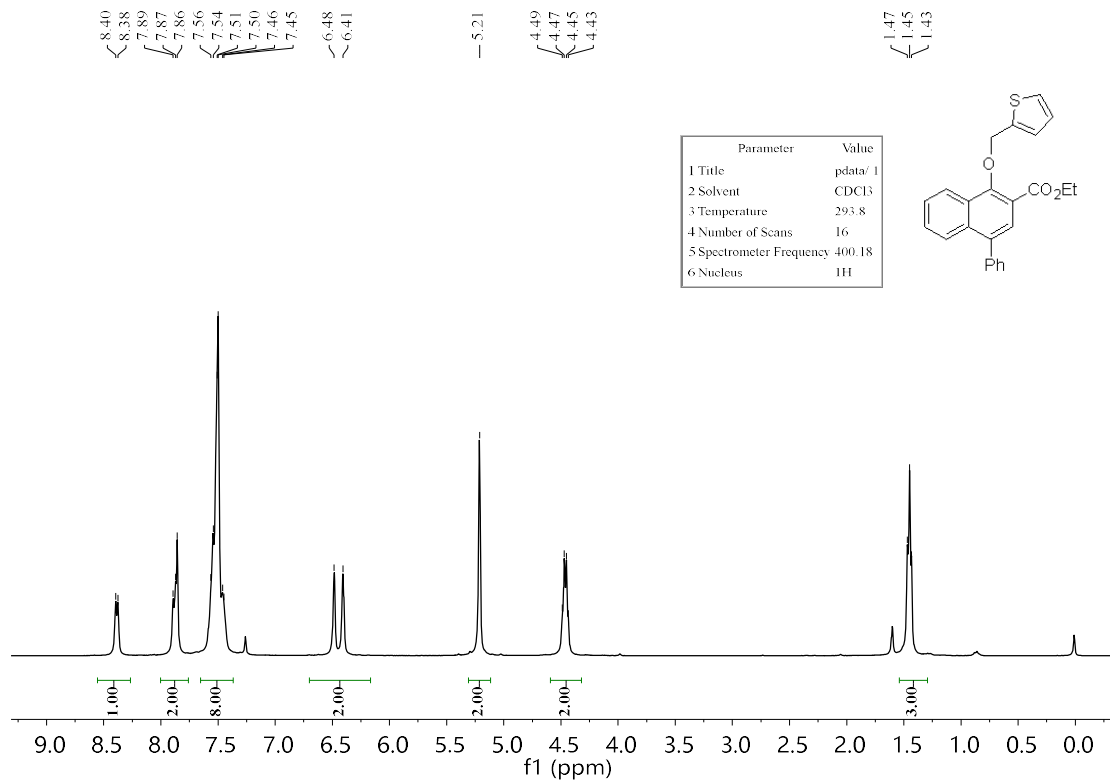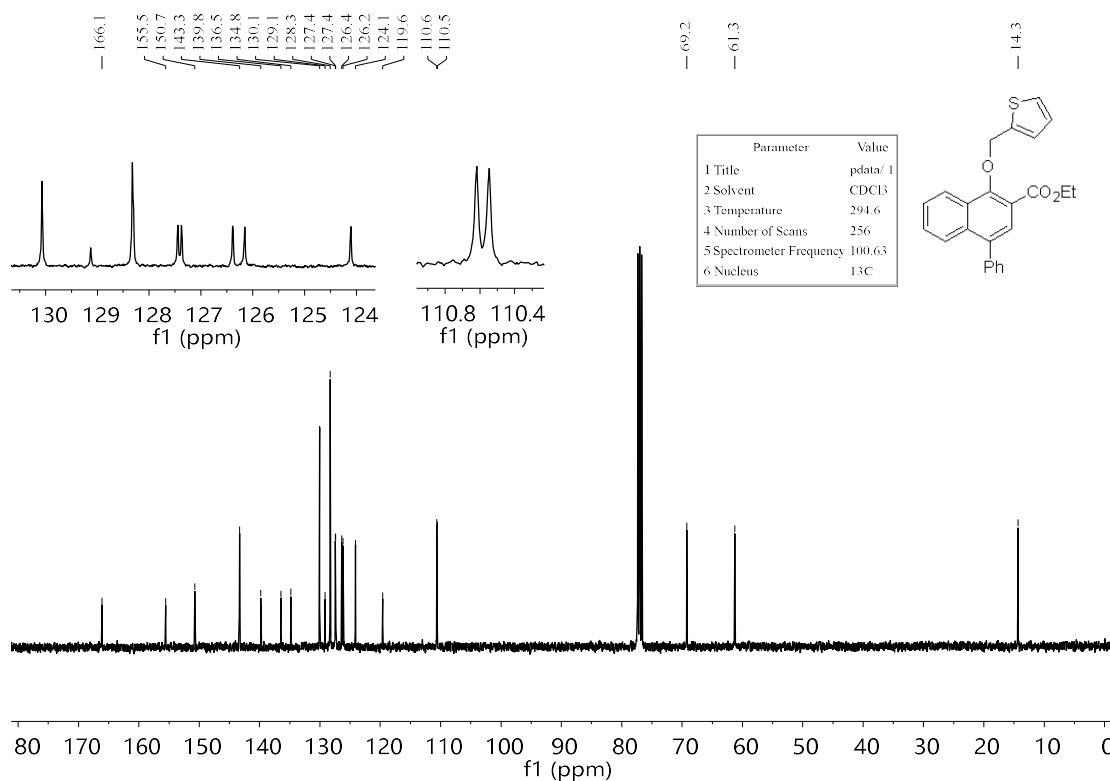

**Ethyl 1-(1-(4-methoxyphenyl)ethoxy)-4-phenyl-2-naphthoate (A45)**

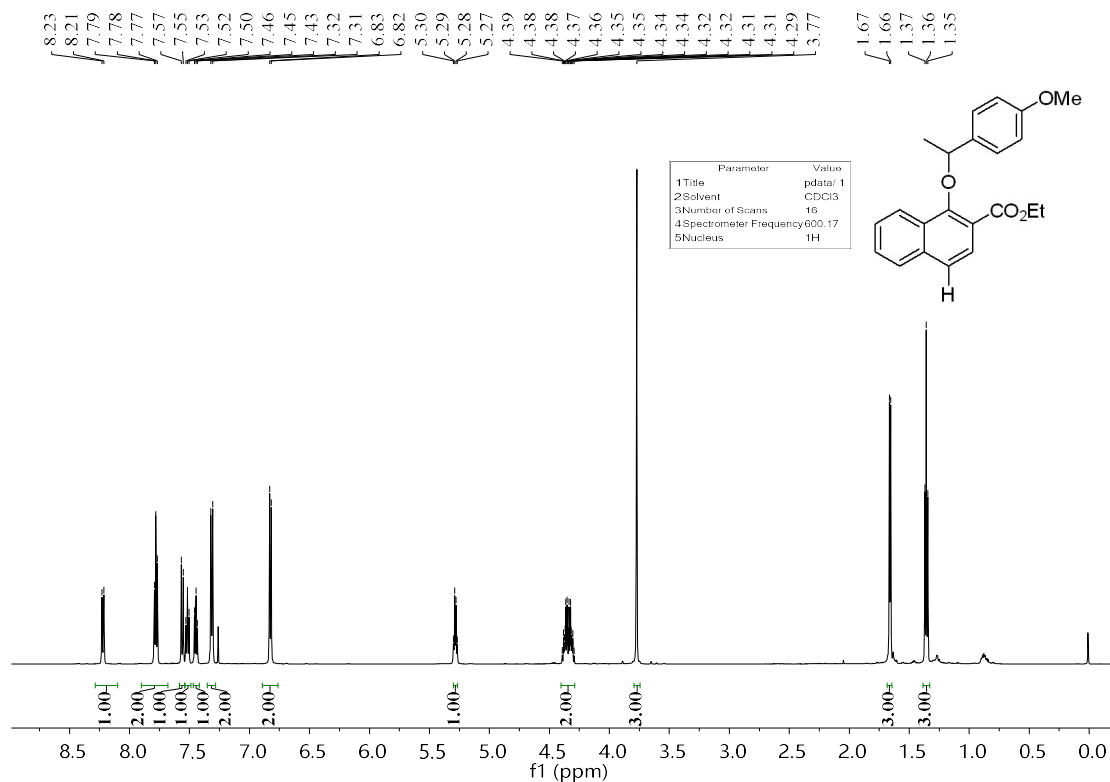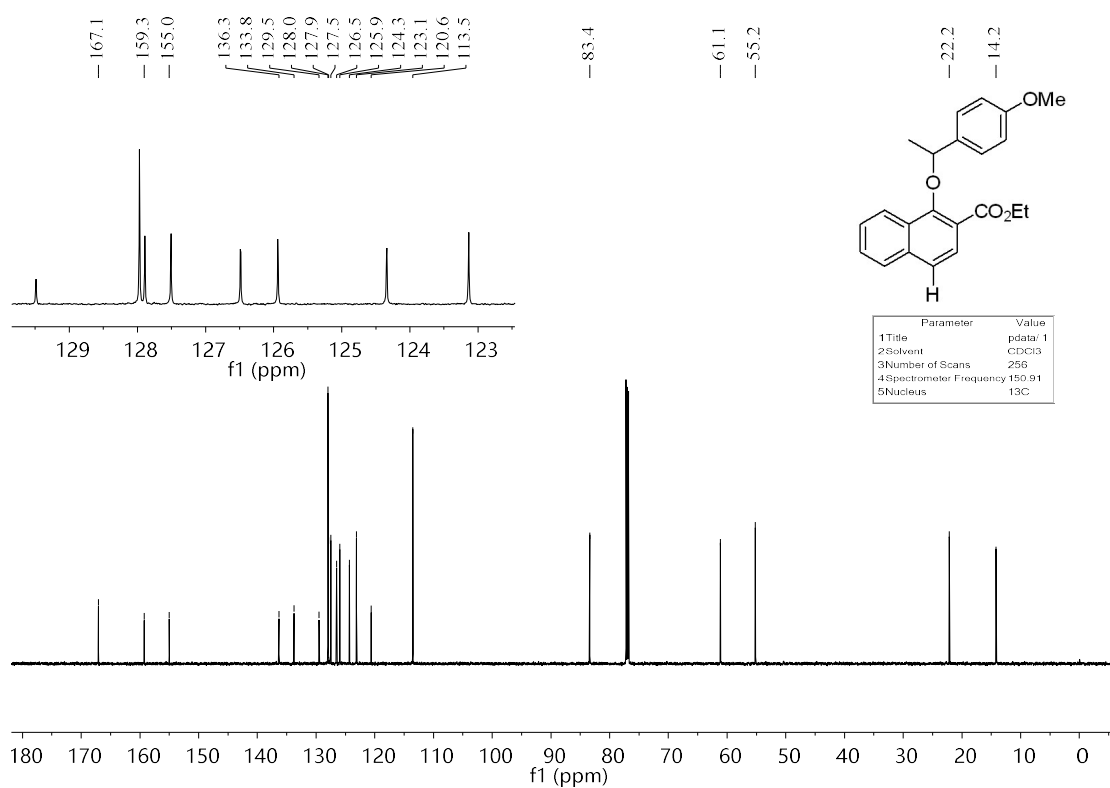



**1-((4-methoxybenzyl)oxy)-4-phenyl-2-naphthonitrile (A46)**

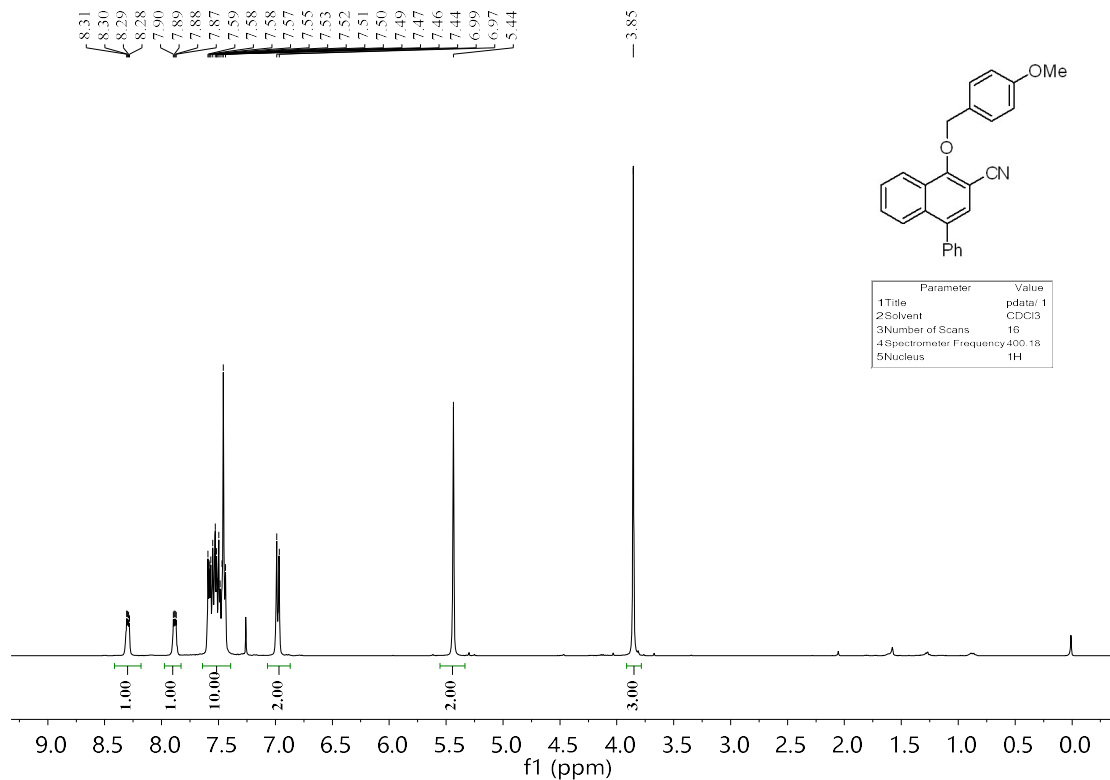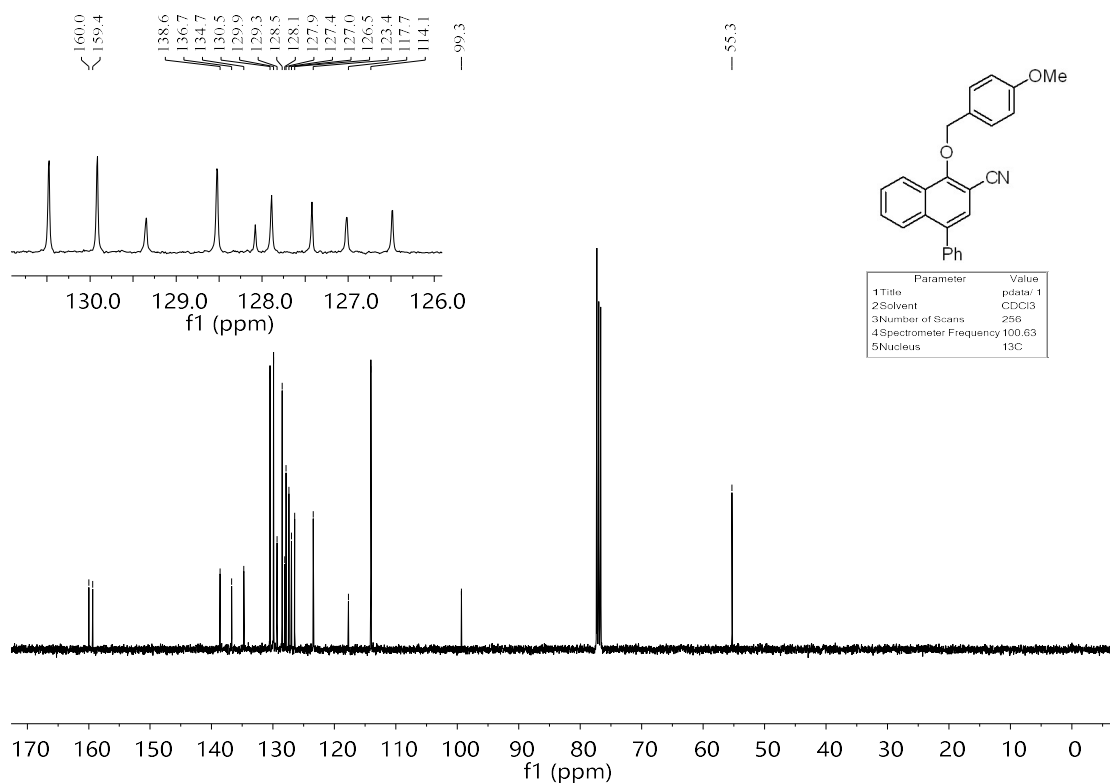

**1-((4-methoxybenzyl)oxy)-2-(methoxymethyl)-4-phenylnaphthalene (A47)**

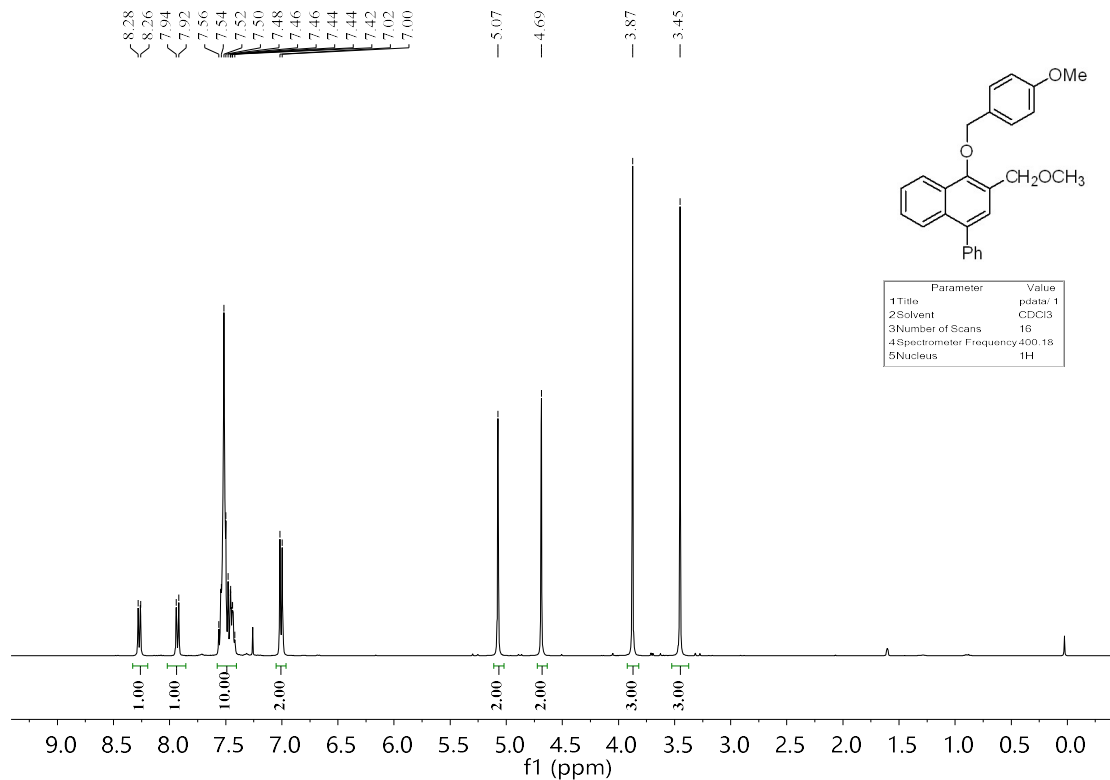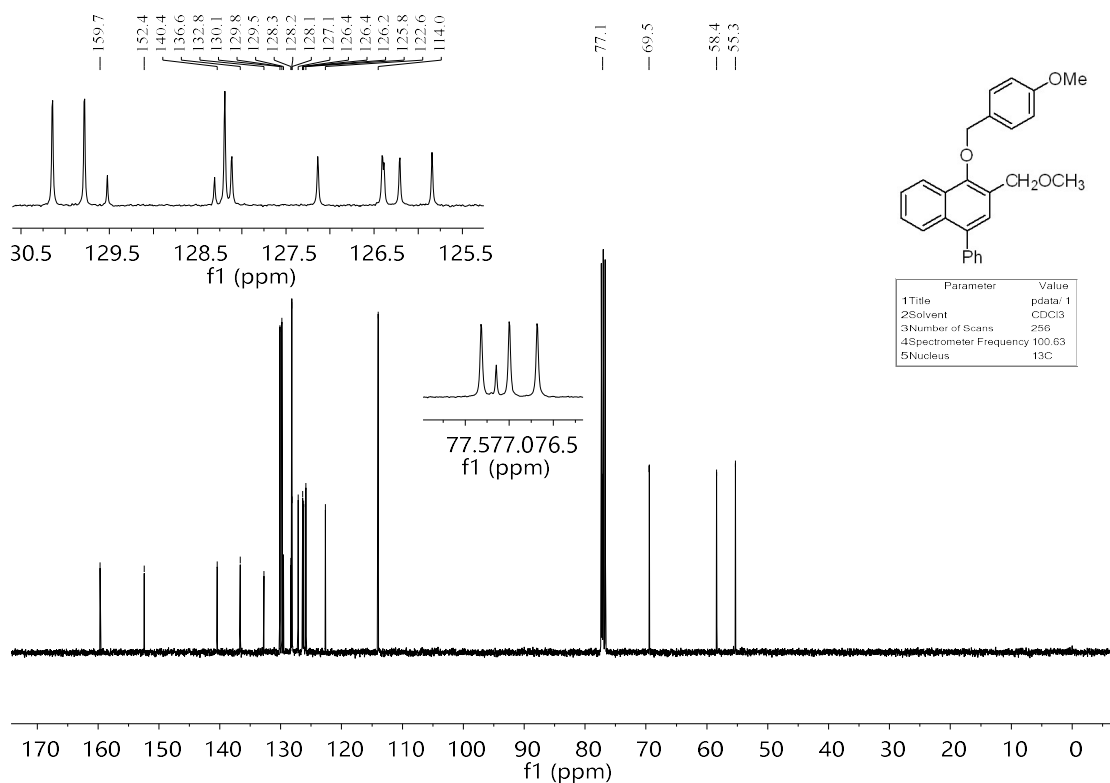

**1-((4-methoxybenzyl)oxy)-N,4-diphenyl-2-naphthamide (A48)**

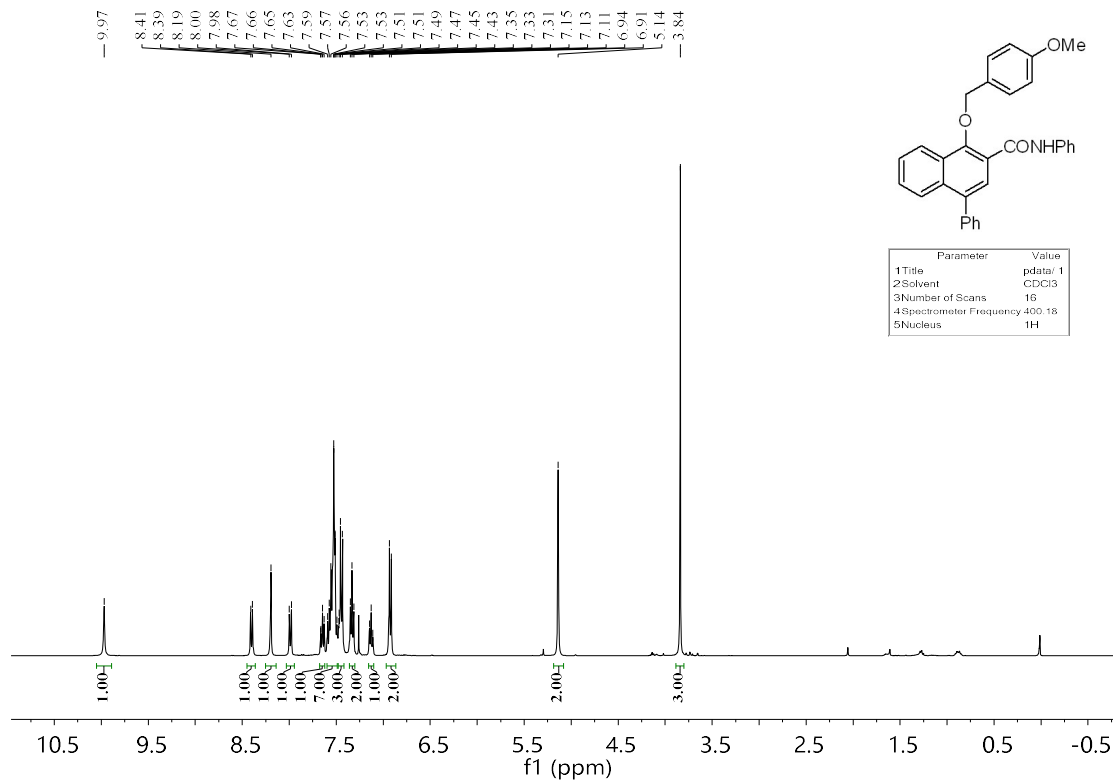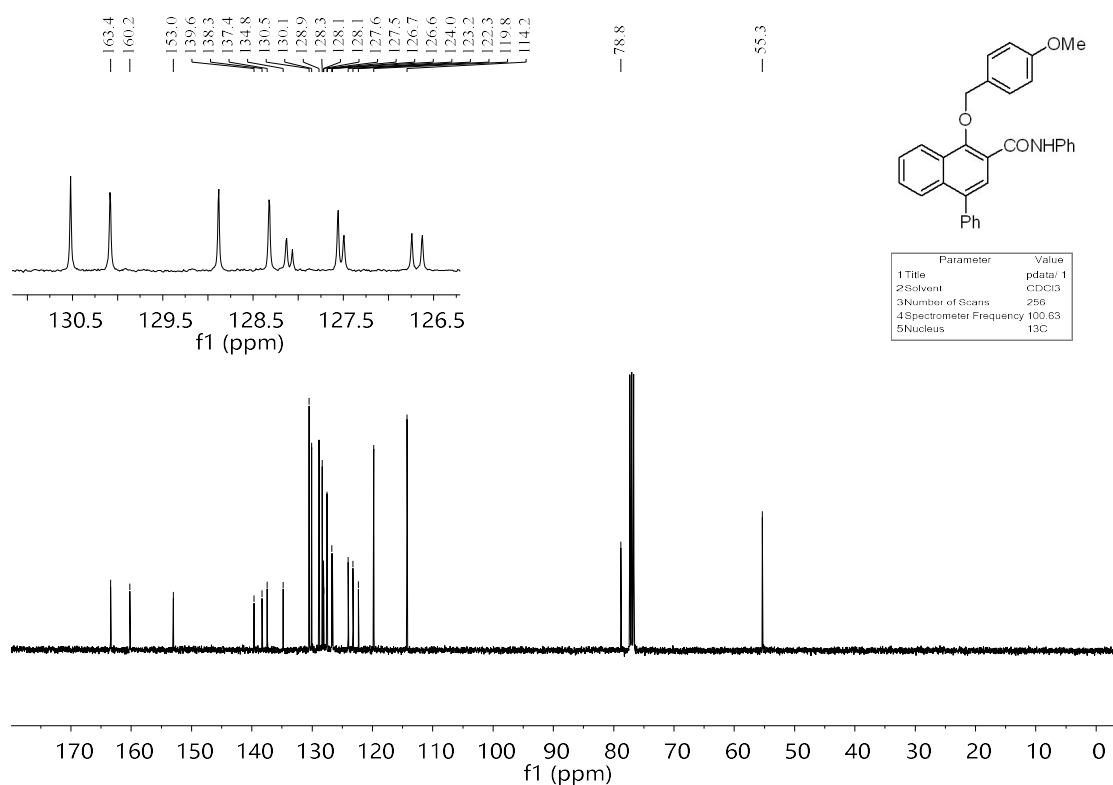

**Ethyl 1-((4-methoxybenzyl)oxy)-4-nitro-2-naphthoate (A49)**

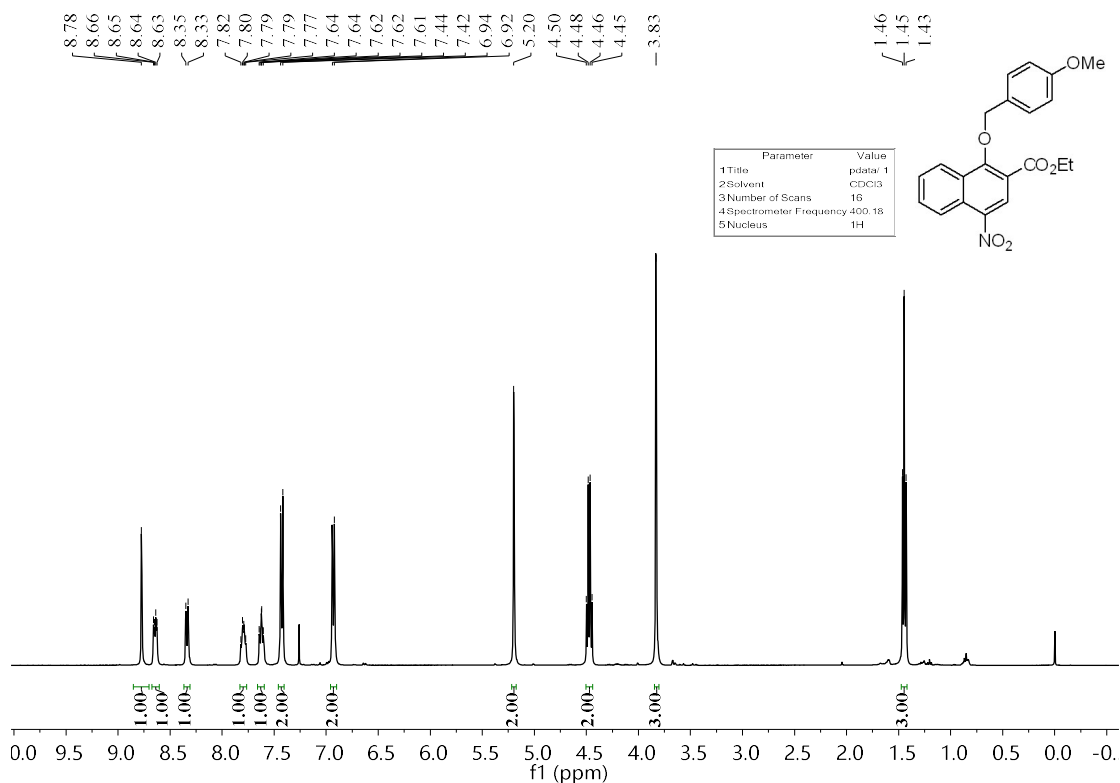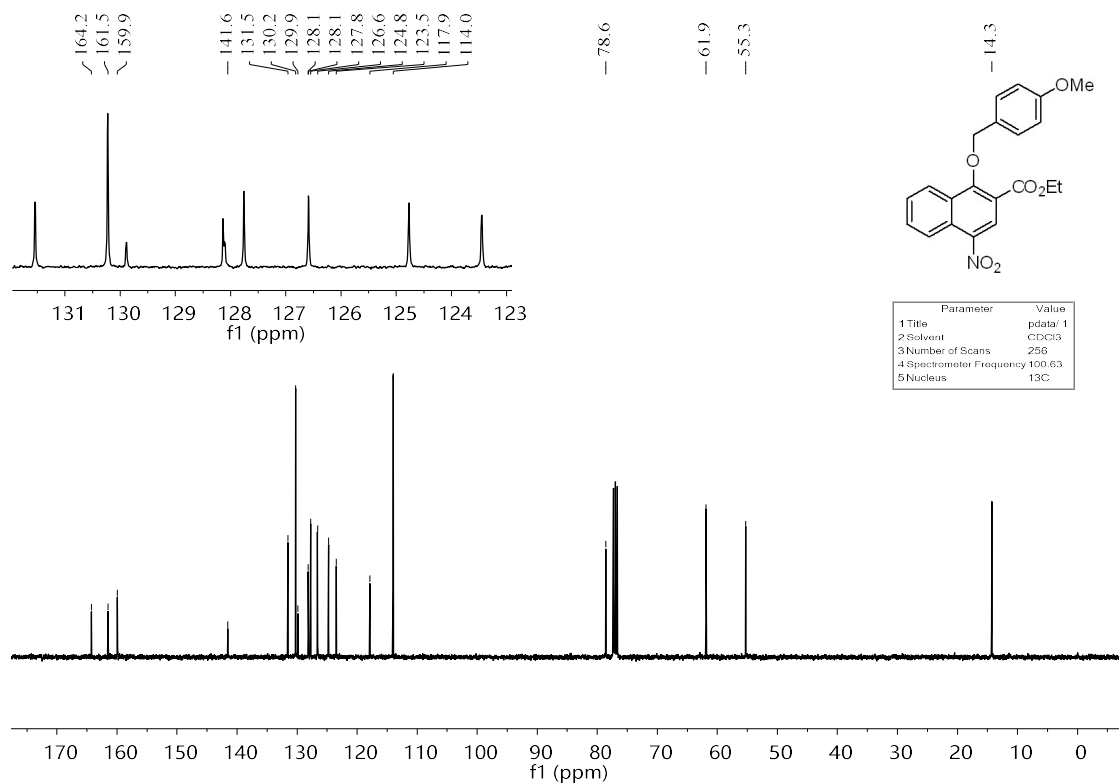

**3-Ethyl 1-methyl 4-((4-methoxybenzyl)oxy)naphthalene-1,3-dicarboxylate (A50)**

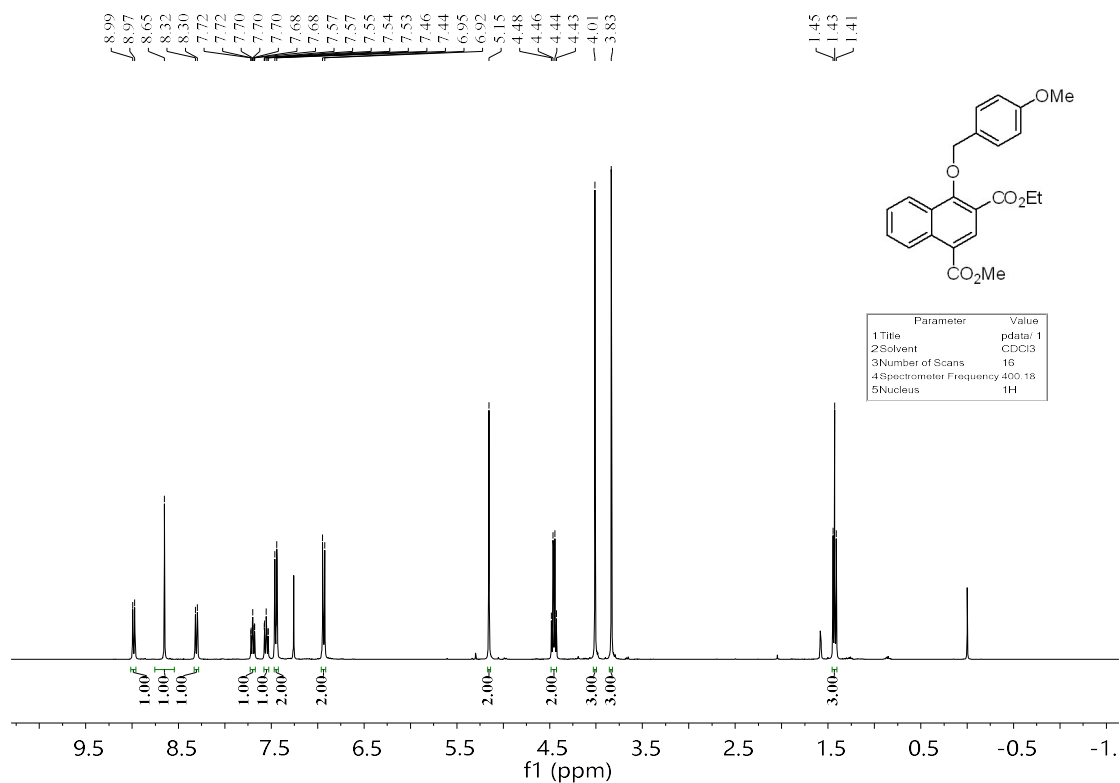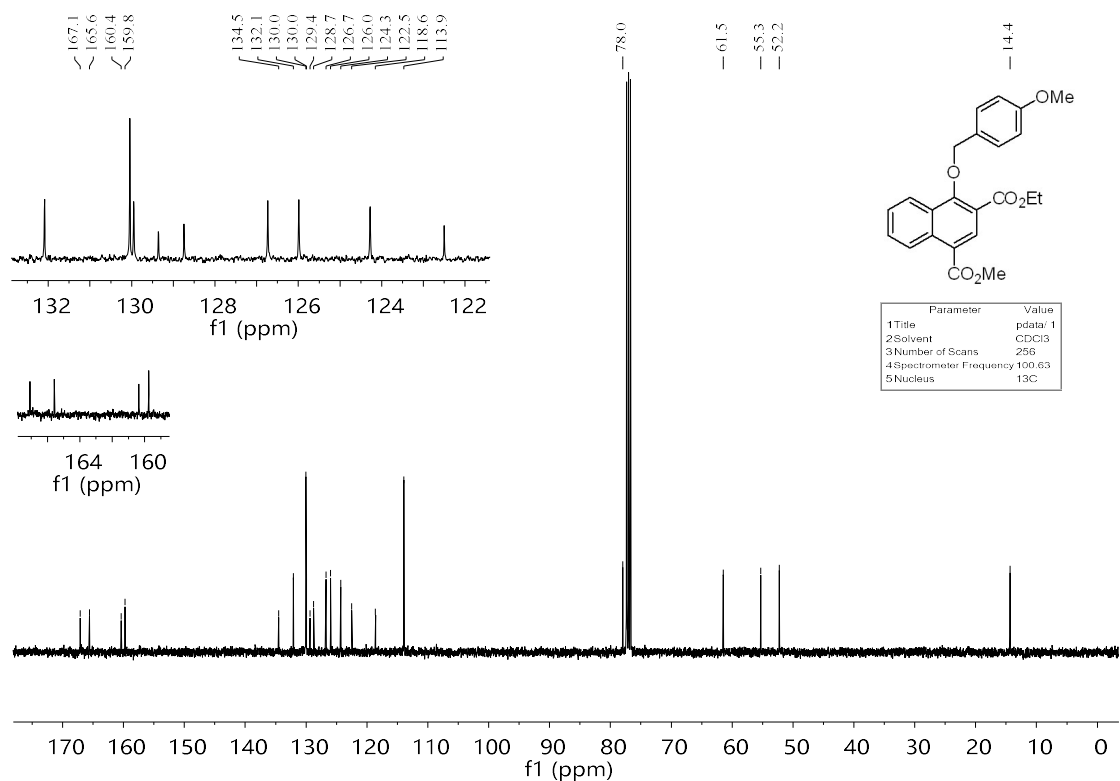

**Ethyl 1-((4-methoxybenzyl)oxy)-4-phenylanthracene-2-carboxylate (A51)**

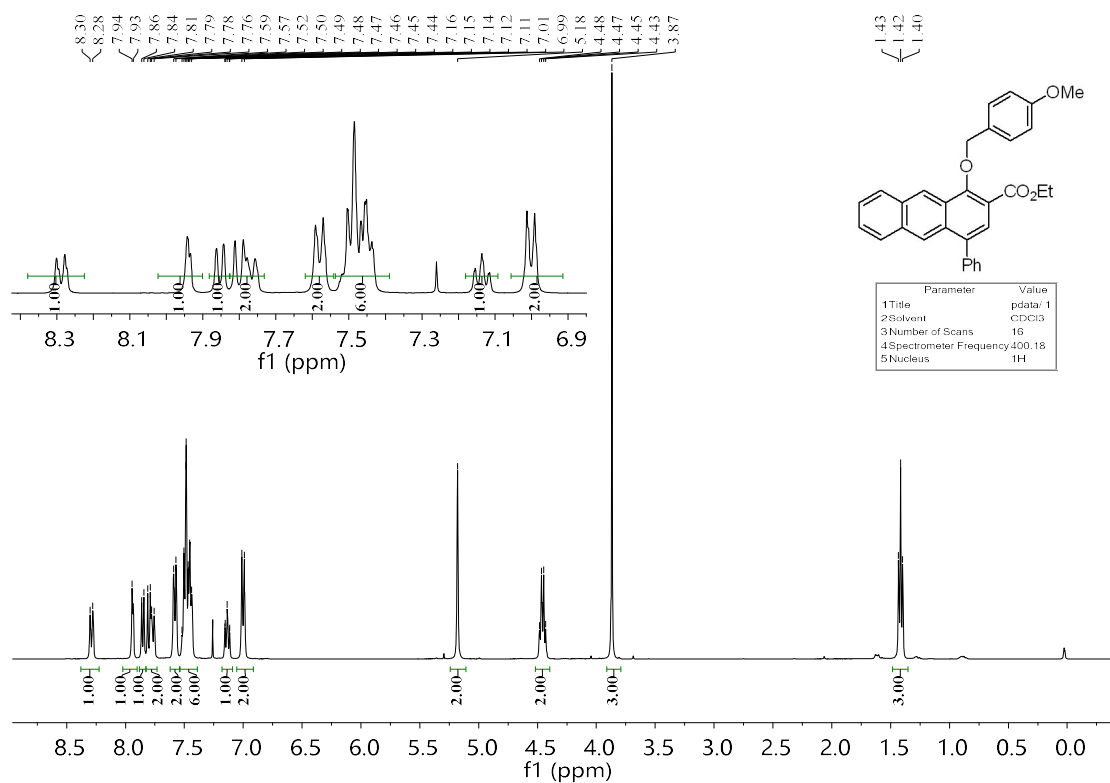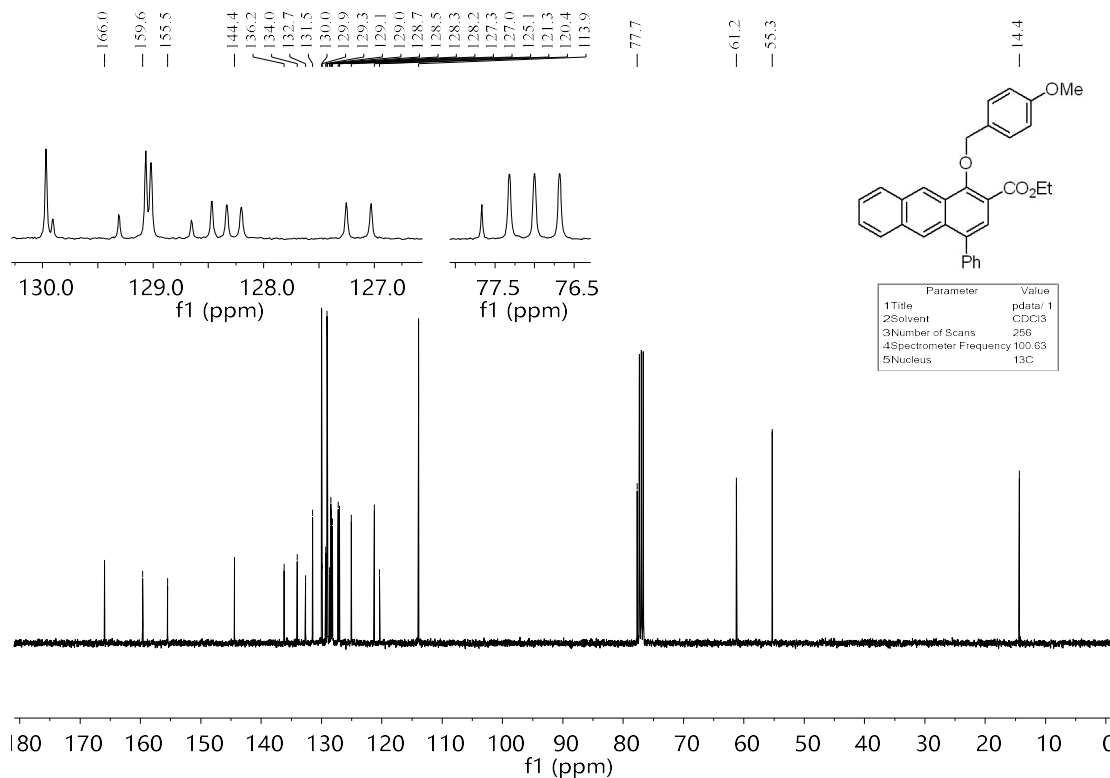

**Ethyl 7-((4-methoxybenzyl)oxy)-4-phenylbenzo[b]thiophene-6-carboxylate (A52)**

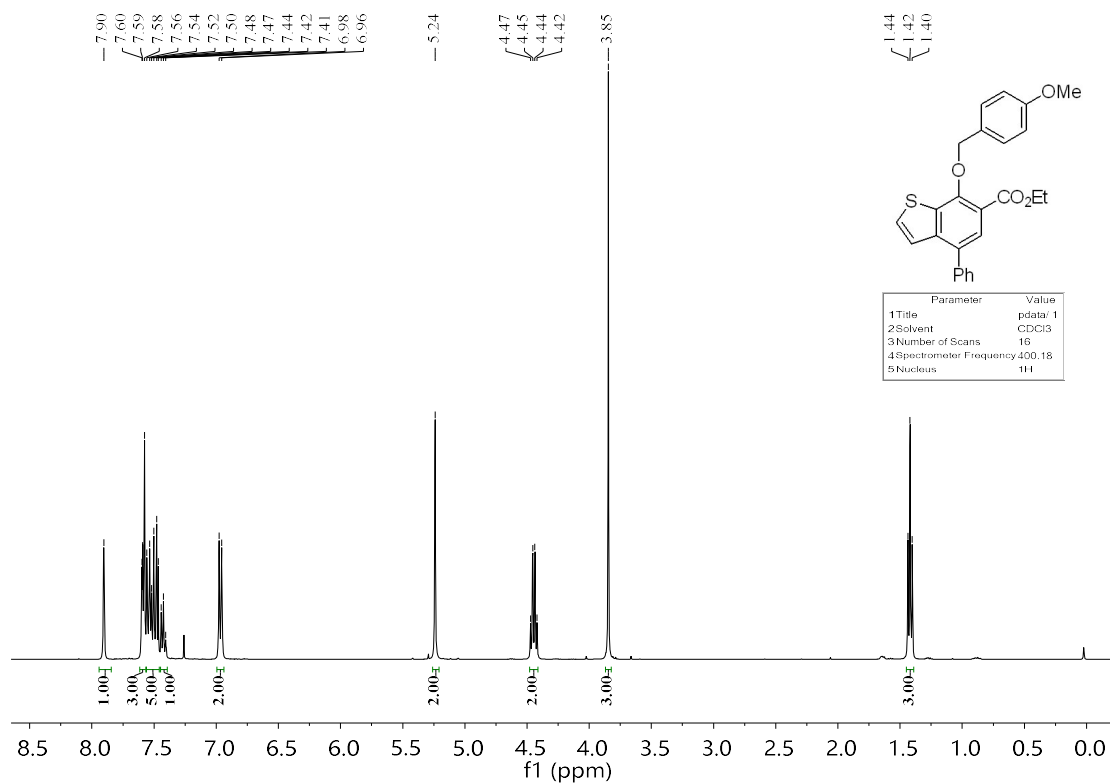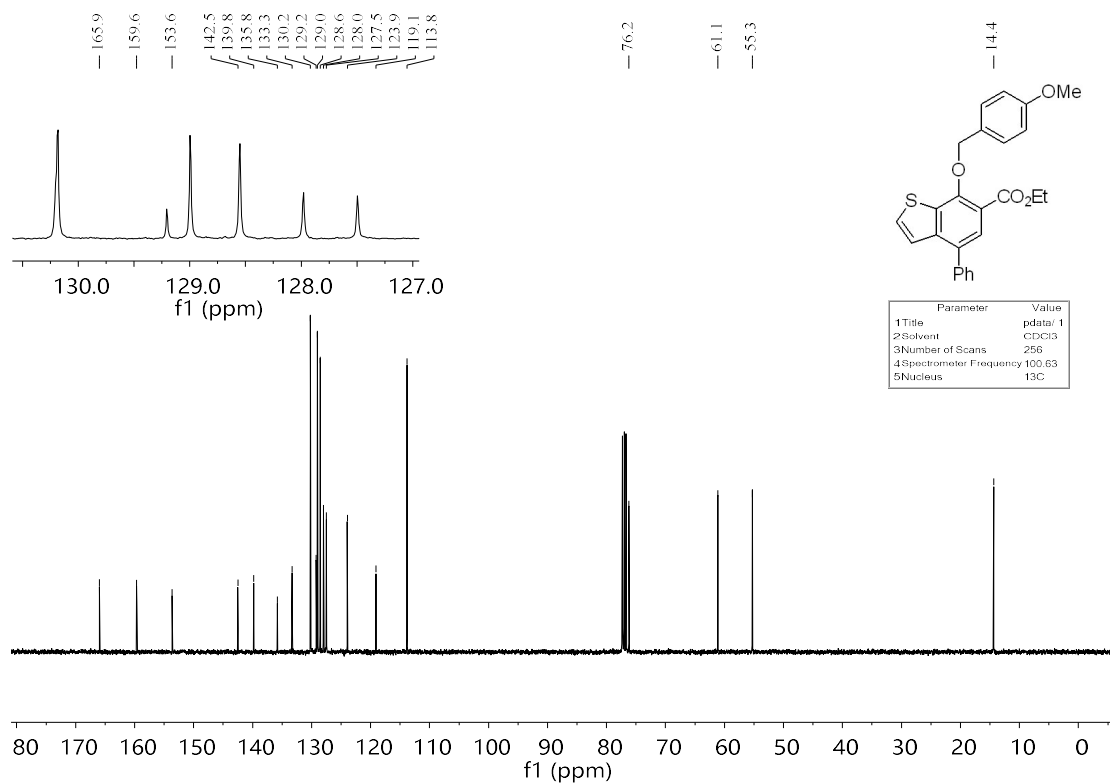

### 13. References

1. a) T. Lu, Y. T. Jiang, F. P. Ma, Z. J. Tang, L. Kuang, Y. X. Wang, B. Wang, *Org. Lett.*, **2017**, *19*, 6344;  
b) S. Y. Peng, L. Wang, J. Wang, *Chem. Eur. J.*, **2013**, *19*, 13322; c) G. Naresh, R. Kant, T. Narender, *Org. Lett.*, **2015**, *17*, 3446.
2. Y. H. Wen, X. Huang, J. L. Huang, Y. Xiong, B. Qin, X. M. Feng, *Synlett*, **2005**, 2445.
